# Supplementary material for: GCN2 eIF2 kinase promotes prostate cancer by maintaining amino acid homeostasis
Source: bioRxiv preprint, doi:10.1101/2022.06.17.496598, version 4 (2022-08-30)
Supplement: Supplementary File 2 [file 496598_file05.xlsx]

## Sheet: Compiled
Ensembl ID	BaseMean	Gene Name	Gene Description	GCN2iB - 6 hours					GCN2iB - 24 hours
				Log2 FC	SE	Wald Stat	p-val	p-adj	Log2 FC	SE	Wald Stat	p-val	p-adj
ENSG00000000003	159.026	TSPAN6	tetraspanin 6 [Source:HGNC Symbol;Acc:HGNC:11858]	-0.039988	0.118238	-0.3382	0.735213	0.85328	-0.407526	0.122234	-3.33399	0.000856095	0.00310254
ENSG00000000005	0	TNMD	tenomodulin [Source:HGNC Symbol;Acc:HGNC:17757]	NA	NA	NA	NA	NA	NA	NA	NA	NA	NA
ENSG00000000419	1147.85	DPM1	dolichyl-phosphate mannosyltransferase subunit 1, catalytic [Source:HGNC Symbol;Acc:HGNC:3005]	0.0017906	0.0428937	0.0417452	0.966702	0.983588	0.277374	0.0419465	6.61256	3.77732e-11	3.22607e-10
ENSG00000000457	203.356	SCYL3	SCY1 like pseudokinase 3 [Source:HGNC Symbol;Acc:HGNC:19285]	0.221142	0.0904144	2.44587	0.0144502	0.0531942	0.268985	0.0901081	2.98514	0.00283447	0.00932649
ENSG00000000460	339.434	C1orf112	chromosome 1 open reading frame 112 [Source:HGNC Symbol;Acc:HGNC:25565]	0.190216	0.0838465	2.26862	0.0232917	0.0773295	0.878164	0.0802292	10.9457	6.96841e-28	1.70941e-26
ENSG00000000938	0.105312	FGR	FGR proto-oncogene, Src family tyrosine kinase [Source:HGNC Symbol;Acc:HGNC:3697]	0	5.94781	0	1	NA	0	5.94781	0	1	NA
ENSG00000000971	0.0617433	CFH	complement factor H [Source:HGNC Symbol;Acc:HGNC:4883]	0	5.94781	0	1	NA	0.962587	5.94781	0.161839	0.871433	NA
ENSG00000001036	397.218	FUCA2	alpha-L-fucosidase 2 [Source:HGNC Symbol;Acc:HGNC:4008]	-0.0725686	0.0681559	-1.06474	0.286992	0.477679	-0.245162	0.0695339	-3.52579	0.000422217	0.00160794
ENSG00000001084	546.37	GCLC	glutamate-cysteine ligase catalytic subunit [Source:HGNC Symbol;Acc:HGNC:4311]	-0.373996	0.0605966	-6.1719	6.74749e-10	1.79081e-08	-0.234639	0.0598366	-3.92133	8.80616e-05	0.00037499
ENSG00000001167	1287.25	NFYA	nuclear transcription factor Y subunit alpha [Source:HGNC Symbol;Acc:HGNC:7804]	0.182368	0.0394033	4.62823	3.68809e-06	4.43784e-05	-0.0397169	0.0402038	-0.98789	0.323207	0.495137
ENSG00000001460	162.736	STPG1	sperm tail PG-rich repeat containing 1 [Source:HGNC Symbol;Acc:HGNC:28070]	0.158806	0.11242	1.41261	0.15777	0.319275	0.121649	0.112927	1.07724	0.281375	0.448827
ENSG00000001461	1390.95	NIPAL3	NIPA like domain containing 3 [Source:HGNC Symbol;Acc:HGNC:25233]	0.0198815	0.0451026	0.440807	0.659353	0.802794	-0.0238131	0.0453068	-0.525596	0.599169	0.747139
ENSG00000001497	1604.34	LAS1L	LAS1 like ribosome biogenesis factor [Source:HGNC Symbol;Acc:HGNC:25726]	0.0254901	0.0350252	0.727766	0.466757	0.656029	0.187997	0.0345669	5.43865	5.36857e-08	3.4444e-07
ENSG00000001561	638.259	ENPP4	ectonucleotide pyrophosphatase/phosphodiesterase 4 [Source:HGNC Symbol;Acc:HGNC:3359]	-0.0185616	0.0689281	-0.26929	0.787707	0.885814	0.173187	0.0681733	2.54039	0.0110729	0.0315275
ENSG00000001617	793.867	SEMA3F	semaphorin 3F [Source:HGNC Symbol;Acc:HGNC:10728]	0.00667804	0.0573524	0.116439	0.907305	0.955425	-0.626729	0.060545	-10.3515	4.12174e-25	8.74049e-24
ENSG00000001626	1.49772	CFTR	CF transmembrane conductance regulator [Source:HGNC Symbol;Acc:HGNC:1884]	-0.0166686	1.07316	-0.0155322	0.987608	NA	0.425271	1.03078	0.412572	0.679921	0.803615
ENSG00000001629	981.999	ANKIB1	ankyrin repeat and IBR domain containing 1 [Source:HGNC Symbol;Acc:HGNC:22215]	-0.122691	0.0465562	-2.63533	0.00840551	0.0344168	-0.011383	0.0461642	-0.246576	0.805236	0.887744
ENSG00000001630	176.142	CYP51A1	cytochrome P450 family 51 subfamily A member 1 [Source:HGNC Symbol;Acc:HGNC:2649]	0.218378	0.117539	1.85792	0.0631805	0.163754	0.394869	0.116199	3.39822	0.000678269	0.0024962
ENSG00000001631	106.379	KRIT1	KRIT1 ankyrin repeat containing [Source:HGNC Symbol;Acc:HGNC:1573]	-0.0209228	0.13211	-0.158375	0.874162	0.935009	-0.224556	0.135049	-1.66277	0.0963592	0.19906
ENSG00000002016	162.277	RAD52	RAD52 homolog, DNA repair protein [Source:HGNC Symbol;Acc:HGNC:9824]	0.0102702	0.106005	0.0968844	0.922818	0.963079	0.028024	0.105992	0.264397	0.791474	0.879601
ENSG00000002079	3.48007	MYH16	myosin heavy chain 16 pseudogene [Source:HGNC Symbol;Acc:HGNC:31038]	-1.77692	0.903718	-1.96623	0.0492719	NA	-0.754771	0.779092	-0.968782	0.332654	0.505285
ENSG00000002330	186.226	BAD	BCL2 associated agonist of cell death [Source:HGNC Symbol;Acc:HGNC:936]	0.10926	0.124927	0.874594	0.381795	0.577531	-0.0649133	0.126556	-0.51292	0.608007	0.753844
ENSG00000002549	2306.21	LAP3	leucine aminopeptidase 3 [Source:HGNC Symbol;Acc:HGNC:18449]	-0.0587095	0.0288597	-2.03431	0.0419201	0.120673	-0.0763995	0.028957	-2.63838	0.00833025	0.0245217
ENSG00000002586	4434.18	CD99	CD99 molecule (Xg blood group) [Source:HGNC Symbol;Acc:HGNC:7082]	-0.134975	0.0360628	-3.74277	0.000182006	0.00138734	-0.220062	0.0361866	-6.08132	1.19197e-09	8.94655e-09
ENSG00000002587	123.307	HS3ST1	heparan sulfate-glucosamine 3-sulfotransferase 1 [Source:HGNC Symbol;Acc:HGNC:5194]	0.0816196	0.127955	0.637879	0.523553	0.701273	0.0645322	0.128389	0.502631	0.615224	0.759136
ENSG00000002726	6.84617	AOC1	amine oxidase copper containing 1 [Source:HGNC Symbol;Acc:HGNC:80]	0.231171	0.985669	0.234532	0.814572	NA	0.509857	0.950142	0.536612	0.591536	0.740733
ENSG00000002745	0.0846695	WNT16	Wnt family member 16 [Source:HGNC Symbol;Acc:HGNC:16267]	-0.496385	5.94781	-0.0834568	0.933488	NA	-0.47998	5.94781	-0.0806987	0.935682	NA
ENSG00000002746	0.267537	HECW1	HECT, C2 and WW domain containing E3 ubiquitin protein ligase 1 [Source:HGNC Symbol;Acc:HGNC:22195]	-0.496418	3.55617	-0.139594	0.888981	NA	-0.480014	3.55617	-0.13498	0.892627	NA
ENSG00000002822	2.93208	MAD1L1	mitotic arrest deficient 1 like 1 [Source:HGNC Symbol;Acc:HGNC:6762]	1.24438	0.785136	1.58492	0.112984	NA	0.62416	0.820807	0.760422	0.447002	0.61582
ENSG00000002834	2257.19	LASP1	LIM and SH3 protein 1 [Source:HGNC Symbol;Acc:HGNC:6513]	0.103029	0.0348738	2.95435	0.00313328	0.015379	-0.103274	0.0355151	-2.90788	0.00363888	0.0116821
ENSG00000002919	506.624	SNX11	sorting nexin 11 [Source:HGNC Symbol;Acc:HGNC:14975]	0.146053	0.0663853	2.20009	0.0278009	0.0882708	-0.292494	0.0688981	-4.24532	2.18284e-05	0.000101327
ENSG00000002933	0.124201	TMEM176A	transmembrane protein 176A [Source:HGNC Symbol;Acc:HGNC:24930]	0.224939	5.45009	0.0412726	0.967079	NA	-0.479993	5.45009	-0.0880706	0.929821	NA
ENSG00000003056	1010.13	M6PR	mannose-6-phosphate receptor, cation dependent [Source:HGNC Symbol;Acc:HGNC:6752]	-0.0507553	0.0435521	-1.16539	0.24386	0.429803	0.01548	0.0433376	0.357195	0.720946	0.831968
ENSG00000003096	65.6806	KLHL13	kelch like family member 13 [Source:HGNC Symbol;Acc:HGNC:22931]	-0.0481799	0.184931	-0.260529	0.794456	0.889834	-0.0808746	0.185823	-0.435224	0.6634	0.792328
ENSG00000003137	1.55198	CYP26B1	cytochrome P450 family 26 subfamily B member 1 [Source:HGNC Symbol;Acc:HGNC:20581]	-0.258624	1.04206	-0.248185	0.803991	NA	-0.567462	1.09129	-0.51999	0.60307	0.750011
ENSG00000003147	734.245	ICA1	islet cell autoantigen 1 [Source:HGNC Symbol;Acc:HGNC:5343]	-0.119814	0.05084	-2.35668	0.018439	0.0643168	-0.487298	0.0529639	-9.20058	3.56019e-20	5.92551e-19
ENSG00000003249	1376.17	DBNDD1	dysbindin domain containing 1 [Source:HGNC Symbol;Acc:HGNC:28455]	-0.157871	0.0494959	-3.18958	0.00142481	0.00797796	-0.569932	0.0508425	-11.2098	3.65216e-29	9.51137e-28
ENSG00000003393	616.012	ALS2	alsin Rho guanine nucleotide exchange factor ALS2 [Source:HGNC Symbol;Acc:HGNC:443]	0.180844	0.0536412	3.37137	0.000747948	0.004702	0.0293528	0.0545589	0.538001	0.590576	0.74011
ENSG00000003400	52.601	CASP10	caspase 10 [Source:HGNC Symbol;Acc:HGNC:1500]	-0.208444	0.193851	-1.07528	0.282249	0.472292	-0.397837	0.198103	-2.00823	0.0446184	0.105448
ENSG00000003402	682.076	CFLAR	CASP8 and FADD like apoptosis regulator [Source:HGNC Symbol;Acc:HGNC:1876]	0.132351	0.0563322	2.34948	0.0187998	0.0651973	0.306545	0.055644	5.50904	3.60804e-08	2.34623e-07
ENSG00000003436	2576.06	TFPI	tissue factor pathway inhibitor [Source:HGNC Symbol;Acc:HGNC:11760]	0.0603086	0.0463015	1.30252	0.192739	0.36533	0.351075	0.0459653	7.63782	2.20938e-14	2.47556e-13
ENSG00000003509	236.075	NDUFAF7	NADH:ubiquinone oxidoreductase complex assembly factor 7 [Source:HGNC Symbol;Acc:HGNC:28816]	0.113605	0.0888019	1.27931	0.200788	0.375878	-0.0800742	0.0906452	-0.883381	0.377031	0.550177
ENSG00000003756	819.361	RBM5	RNA binding motif protein 5 [Source:HGNC Symbol;Acc:HGNC:9902]	-0.088535	0.0523937	-1.6898	0.091066	0.214683	0.106876	0.0516087	2.07089	0.0383691	0.092967
ENSG00000003987	15.5538	MTMR7	myotubularin related protein 7 [Source:HGNC Symbol;Acc:HGNC:7454]	-0.0898376	0.341462	-0.263097	0.792476	NA	-0.181616	0.345942	-0.52499	0.59959	0.74723
ENSG00000003989	467.902	SLC7A2	solute carrier family 7 member 2 [Source:HGNC Symbol;Acc:HGNC:11060]	0.186018	0.0890851	2.08809	0.0367896	0.108831	0.306414	0.0886615	3.456	0.000548264	0.0020517
ENSG00000004059	1979.44	ARF5	ADP ribosylation factor 5 [Source:HGNC Symbol;Acc:HGNC:658]	-0.109376	0.045384	-2.41001	0.0159522	0.0574071	-0.00240947	0.0451868	-0.0533225	0.957475	0.976147
ENSG00000004139	383.643	SARM1	sterile alpha and TIR motif containing 1 [Source:HGNC Symbol;Acc:HGNC:17074]	-0.096596	0.0796219	-1.21318	0.22506	0.407634	-0.50036	0.0824565	-6.06817	1.29373e-09	9.67596e-09
ENSG00000004142	4815.88	POLDIP2	DNA polymerase delta interacting protein 2 [Source:HGNC Symbol;Acc:HGNC:23781]	-0.198259	0.0241719	-8.20202	2.36375e-16	1.49598e-14	-0.649409	0.0250435	-25.9312	2.96293e-148	2.31778e-145
ENSG00000004399	6.37086	PLXND1	plexin D1 [Source:HGNC Symbol;Acc:HGNC:9107]	-0.207741	0.563196	-0.36886	0.712232	NA	-0.13395	0.560067	-0.239167	0.810976	0.891234
ENSG00000004455	4352.32	AK2	adenylate kinase 2 [Source:HGNC Symbol;Acc:HGNC:362]	0.030582	0.0222505	1.37444	0.169305	0.334544	0.107538	0.022138	4.85761	1.18809e-06	6.4875e-06
ENSG00000004468	1.70321	CD38	CD38 molecule [Source:HGNC Symbol;Acc:HGNC:1667]	-0.769277	1.20029	-0.640908	0.521583	NA	0.815035	0.993045	0.820744	0.411792	0.583018
ENSG00000004478	7471.05	FKBP4	FKBP prolyl isomerase 4 [Source:HGNC Symbol;Acc:HGNC:3720]	-0.0199615	0.0228777	-0.872532	0.382918	0.578464	-0.0195166	0.0228944	-0.852462	0.393958	0.566271
ENSG00000004487	1764.16	KDM1A	lysine demethylase 1A [Source:HGNC Symbol;Acc:HGNC:29079]	0.0640341	0.0387402	1.65291	0.0983493	0.227428	0.173054	0.0385037	4.49448	6.9741e-06	3.45288e-05
ENSG00000004534	1020.9	RBM6	RNA binding motif protein 6 [Source:HGNC Symbol;Acc:HGNC:9903]	0.0956782	0.0489382	1.95508	0.0505732	0.139307	0.269152	0.048386	5.56261	2.65772e-08	1.75473e-07
ENSG00000004660	835.474	CAMKK1	calcium/calmodulin dependent protein kinase kinase 1 [Source:HGNC Symbol;Acc:HGNC:1469]	0.143276	0.0477119	3.00294	0.00267383	0.0134653	-0.278007	0.0498971	-5.5716	2.52412e-08	1.67017e-07
ENSG00000004700	543.886	RECQL	RecQ like helicase [Source:HGNC Symbol;Acc:HGNC:9948]	0.00329775	0.0646099	0.0510409	0.959293	0.980797	0.113663	0.0641438	1.772	0.0763954	0.165119
ENSG00000004766	400.526	VPS50	VPS50 subunit of EARP/GARPII complex [Source:HGNC Symbol;Acc:HGNC:25956]	0.105023	0.0693743	1.51385	0.130063	0.278274	0.350244	0.0679491	5.15451	2.54295e-07	1.51039e-06
ENSG00000004776	2.27633	HSPB6	heat shock protein family B (small) member 6 [Source:HGNC Symbol;Acc:HGNC:26511]	-0.95346	0.900255	-1.0591	0.289554	NA	-1.92724	1.03365	-1.8645	0.0622516	0.139267
ENSG00000004777	268.37	ARHGAP33	Rho GTPase activating protein 33 [Source:HGNC Symbol;Acc:HGNC:23085]	-0.00577185	0.0825306	-0.0699358	0.944245	0.973683	-0.121521	0.0836999	-1.45186	0.14654	0.27786
ENSG00000004779	2534.55	NDUFAB1	NADH:ubiquinone oxidoreductase subunit AB1 [Source:HGNC Symbol;Acc:HGNC:7694]	-0.085862	0.0328526	-2.61355	0.00896064	0.0361338	0.0400132	0.0326057	1.22718	0.219754	0.376373
ENSG00000004799	0.373221	PDK4	pyruvate dehydrogenase kinase 4 [Source:HGNC Symbol;Acc:HGNC:8812]	2.1854	5.89721	0.370581	0.710949	NA	2.54827	5.88919	0.432703	0.665231	NA
ENSG00000004809	2.89712	SLC22A16	solute carrier family 22 member 16 [Source:HGNC Symbol;Acc:HGNC:20302]	-0.371368	0.893837	-0.415476	0.677794	NA	0.895589	0.805067	1.11244	0.265949	0.430892
ENSG00000004838	28.2131	ZMYND10	zinc finger MYND-type containing 10 [Source:HGNC Symbol;Acc:HGNC:19412]	-0.172412	0.260478	-0.661908	0.50803	0.689953	-0.156674	0.2605	-0.601434	0.547551	0.703385
ENSG00000004846	4.09574	ABCB5	ATP binding cassette subfamily B member 5 [Source:HGNC Symbol;Acc:HGNC:46]	-1.45801	0.843774	-1.72796	0.0839948	NA	2.1787	0.624796	3.48706	0.000488354	0.0018465
ENSG00000004848	33.7932	ARX	aristaless related homeobox [Source:HGNC Symbol;Acc:HGNC:18060]	0.219581	0.242117	0.90692	0.364449	0.559945	-0.343927	0.256652	-1.34005	0.180228	0.32546
ENSG00000004864	1107.05	SLC25A13	solute carrier family 25 member 13 [Source:HGNC Symbol;Acc:HGNC:10983]	-0.0250172	0.0435522	-0.574419	0.565684	0.735474	-0.0161524	0.0435799	-0.370639	0.710906	0.824528
ENSG00000004866	1181.97	ST7	suppression of tumorigenicity 7 [Source:HGNC Symbol;Acc:HGNC:11351]	-0.0157181	0.0456462	-0.344346	0.730586	0.849972	0.445342	0.0440559	10.1086	5.06226e-24	1.02316e-22
ENSG00000004897	1818.93	CDC27	cell division cycle 27 [Source:HGNC Symbol;Acc:HGNC:1728]	0.0498702	0.0429303	1.16166	0.245375	0.431719	0.259215	0.0425037	6.09865	1.06969e-09	8.06601e-09
ENSG00000004939	1.08822	SLC4A1	solute carrier family 4 member 1 (Diego blood group) [Source:HGNC Symbol;Acc:HGNC:11027]	-0.112911	1.31056	-0.0861546	0.931344	NA	-0.0759115	1.30775	-0.0580474	0.953711	NA
ENSG00000004948	0.036491	CALCR	calcitonin receptor [Source:HGNC Symbol;Acc:HGNC:1440]	0	5.94781	0	1	NA	0	5.94781	0	1	NA
ENSG00000004961	696.198	HCCS	holocytochrome c synthase [Source:HGNC Symbol;Acc:HGNC:4837]	0.159437	0.0507915	3.13906	0.00169492	0.00925803	0.169184	0.0508255	3.32872	0.000872471	0.00315755
ENSG00000004975	1450.65	DVL2	dishevelled segment polarity protein 2 [Source:HGNC Symbol;Acc:HGNC:3086]	0.0812106	0.0387191	2.09743	0.0359557	0.107037	0.0569061	0.0388565	1.46452	0.143052	0.272813
ENSG00000005001	24.4985	PRSS22	serine protease 22 [Source:HGNC Symbol;Acc:HGNC:14368]	0.51599	0.378271	1.36408	0.172543	0.338655	0.763053	0.371301	2.05508	0.0398714	0.0960341
ENSG00000005007	4025.01	UPF1	UPF1 RNA helicase and ATPase [Source:HGNC Symbol;Acc:HGNC:9962]	0.214824	0.0351504	6.11156	9.86646e-10	2.55171e-08	-0.043417	0.0354877	-1.22344	0.221164	0.37796
ENSG00000005020	1208.73	SKAP2	src kinase associated phosphoprotein 2 [Source:HGNC Symbol;Acc:HGNC:15687]	-0.0726592	0.042019	-1.7292	0.0837737	0.202981	0.142441	0.0412732	3.45116	0.000558174	0.00208584
ENSG00000005022	7981.77	SLC25A5	solute carrier family 25 member 5 [Source:HGNC Symbol;Acc:HGNC:10991]	-0.0785048	0.0262279	-2.99317	0.00276092	0.0138298	0.0686727	0.0261181	2.62931	0.00855581	0.0251331
ENSG00000005059	43.8944	MCUB	mitochondrial calcium uniporter dominant negative beta subunit [Source:HGNC Symbol;Acc:HGNC:26076]	-0.051096	0.205411	-0.24875	0.803554	0.895529	-0.222186	0.209383	-1.06115	0.288624	0.457059
ENSG00000005073	5.60437	HOXA11	homeobox A11 [Source:HGNC Symbol;Acc:HGNC:5101]	0.782249	0.578117	1.3531	0.176025	NA	-0.0302856	0.631771	-0.0479377	0.961766	0.978728
ENSG00000005075	734.697	POLR2J	RNA polymerase II subunit J [Source:HGNC Symbol;Acc:HGNC:9197]	-0.0916688	0.0702042	-1.30575	0.191639	0.363769	0.140592	0.0694159	2.02536	0.0428306	0.101895
ENSG00000005100	1243.05	DHX33	DEAH-box helicase 33 [Source:HGNC Symbol;Acc:HGNC:16718]	0.169041	0.0442804	3.81752	0.000134801	0.00107092	0.112741	0.0445017	2.53341	0.0112959	0.0321235
ENSG00000005102	0	MEOX1	mesenchyme homeobox 1 [Source:HGNC Symbol;Acc:HGNC:7013]	NA	NA	NA	NA	NA	NA	NA	NA	NA	NA
ENSG00000005108	1.46763	THSD7A	thrombospondin type 1 domain containing 7A [Source:HGNC Symbol;Acc:HGNC:22207]	-0.358252	1.06157	-0.337474	0.73576	NA	-0.00948819	1.03588	-0.00915958	0.992692	0.995756
ENSG00000005156	1148.02	LIG3	DNA ligase 3 [Source:HGNC Symbol;Acc:HGNC:6600]	-0.0860619	0.0478558	-1.79836	0.0721199	0.181284	-0.224833	0.0483836	-4.64689	3.36976e-06	1.74358e-05
ENSG00000005175	1387.68	RPAP3	RNA polymerase II associated protein 3 [Source:HGNC Symbol;Acc:HGNC:26151]	0.0640986	0.0455253	1.40798	0.159138	0.321302	0.49566	0.0443869	11.1668	5.92648e-29	1.53023e-27
ENSG00000005187	396.285	ACSM3	acyl-CoA synthetase medium chain family member 3 [Source:HGNC Symbol;Acc:HGNC:10522]	-0.135634	0.063302	-2.14265	0.032141	0.0985566	-0.407077	0.0655504	-6.21014	5.29383e-10	4.09564e-09
ENSG00000005189	507.118	REXO5	RNA exonuclease 5 [Source:HGNC Symbol;Acc:HGNC:24661]	0.0998475	0.0593363	1.68274	0.0924255	0.216956	0.136177	0.0592298	2.29912	0.0214981	0.0562443
ENSG00000005194	1493.27	CIAPIN1	cytokine induced apoptosis inhibitor 1 [Source:HGNC Symbol;Acc:HGNC:28050]	0.193694	0.0449413	4.30994	1.63301e-05	0.000166643	0.117655	0.0451786	2.60422	0.00920826	0.0268148
ENSG00000005206	726.5	SPPL2B	signal peptide peptidase like 2B [Source:HGNC Symbol;Acc:HGNC:30627]	-0.109705	0.0618451	-1.77388	0.0760838	0.188654	-0.315276	0.0628448	-5.01674	5.25555e-07	3.00494e-06
ENSG00000005238	485.83	FAM214B	family with sequence similarity 214 member B [Source:HGNC Symbol;Acc:HGNC:25666]	-0.114625	0.0679126	-1.68783	0.0914442	0.215382	-0.195664	0.0684918	-2.85675	0.00428001	0.0135343
ENSG00000005243	0.77416	COPZ2	coatomer protein complex subunit zeta 2 [Source:HGNC Symbol;Acc:HGNC:19356]	0.8165	1.82463	0.447487	0.654523	NA	-0.725167	2.00288	-0.362061	0.717306	NA
ENSG00000005249	543.777	PRKAR2B	protein kinase cAMP-dependent type II regulatory subunit beta [Source:HGNC Symbol;Acc:HGNC:9392]	-0.0915206	0.0636085	-1.43881	0.150204	0.309047	-0.190257	0.0643051	-2.95867	0.00308974	0.0100754
ENSG00000005302	490.366	MSL3	MSL complex subunit 3 [Source:HGNC Symbol;Acc:HGNC:7370]	-0.0175527	0.0666074	-0.263524	0.792147	0.888653	-0.0882828	0.0671038	-1.31562	0.188303	0.335965
ENSG00000005339	1573.43	CREBBP	CREB binding protein [Source:HGNC Symbol;Acc:HGNC:2348]	0.189418	0.0466203	4.06299	4.84487e-05	0.000434751	0.57112	0.0457991	12.4701	1.08655e-35	3.87653e-34
ENSG00000005379	76.1089	TSPOAP1	TSPO associated protein 1 [Source:HGNC Symbol;Acc:HGNC:16831]	-0.348795	0.166742	-2.09182	0.0364546	0.108156	-0.677777	0.173075	-3.9161	8.99941e-05	0.000382448
ENSG00000005381	0.279126	MPO	myeloperoxidase [Source:HGNC Symbol;Acc:HGNC:7218]	0.749206	3.4776	0.215437	0.829426	NA	-1.23395	3.5251	-0.350048	0.726303	NA
ENSG00000005421	0.148118	PON1	paraoxonase 1 [Source:HGNC Symbol;Acc:HGNC:9204]	0.207948	5.16675	0.0402473	0.967896	NA	-0.466049	5.16809	-0.0901782	0.928146	NA
ENSG00000005436	775.296	GCFC2	GC-rich sequence DNA-binding factor 2 [Source:HGNC Symbol;Acc:HGNC:1317]	0.118912	0.0592076	2.00839	0.0446017	0.126565	0.31664	0.0585748	5.40575	6.45391e-08	4.10211e-07
ENSG00000005448	296.638	WDR54	WD repeat domain 54 [Source:HGNC Symbol;Acc:HGNC:25770]	-0.0637202	0.0862367	-0.738899	0.459968	0.649541	0.154128	0.0848143	1.81725	0.0691796	0.152107
ENSG00000005469	705.203	CROT	carnitine O-octanoyltransferase [Source:HGNC Symbol;Acc:HGNC:2366]	-0.0183809	0.0572767	-0.320914	0.748276	0.861718	0.177313	0.0566497	3.12999	0.00174813	0.0059861
ENSG00000005471	3.17644	ABCB4	ATP binding cassette subfamily B member 4 [Source:HGNC Symbol;Acc:HGNC:45]	-0.110208	0.673994	-0.163515	0.870113	NA	-0.179254	0.679907	-0.263645	0.792053	0.879962
ENSG00000005483	1185.2	KMT2E	lysine methyltransferase 2E [Source:HGNC Symbol;Acc:HGNC:18541]	0.0619169	0.0530729	1.16664	0.243356	0.429257	0.282871	0.0524545	5.3927	6.94061e-08	4.40218e-07
ENSG00000005486	1897.06	RHBDD2	rhomboid domain containing 2 [Source:HGNC Symbol;Acc:HGNC:23082]	0.00714166	0.0371842	0.192062	0.847694	0.919681	-0.281902	0.0380388	-7.41091	1.2544e-13	1.32404e-12
ENSG00000005513	152.803	SOX8	SRY-box transcription factor 8 [Source:HGNC Symbol;Acc:HGNC:11203]	0.234346	0.108334	2.16317	0.0305282	0.0946028	-0.473746	0.117267	-4.0399	5.34751e-05	0.000235351
ENSG00000005700	3049.82	IBTK	inhibitor of Bruton tyrosine kinase [Source:HGNC Symbol;Acc:HGNC:17853]	-0.068731	0.0507729	-1.3537	0.175834	0.342965	-0.0280753	0.0507424	-0.553292	0.580064	0.731696
ENSG00000005801	554.118	ZNF195	zinc finger protein 195 [Source:HGNC Symbol;Acc:HGNC:12986]	-0.121234	0.0569325	-2.12943	0.0332184	0.100871	-0.0240419	0.0564617	-0.425808	0.670248	0.796798
ENSG00000005810	4045.48	MYCBP2	MYC binding protein 2 [Source:HGNC Symbol;Acc:HGNC:23386]	-0.0372955	0.0646301	-0.57706	0.563899	0.734095	0.105148	0.0645507	1.62893	0.103329	0.210555
ENSG00000005812	963.521	FBXL3	F-box and leucine rich repeat protein 3 [Source:HGNC Symbol;Acc:HGNC:13599]	0.133897	0.0552433	2.42376	0.0153606	0.0556736	0.400735	0.05448	7.35563	1.90025e-13	1.97553e-12
ENSG00000005844	0.476067	ITGAL	integrin subunit alpha L [Source:HGNC Symbol;Acc:HGNC:6148]	-0.496417	2.34944	-0.211291	0.83266	NA	1.54486	2.27472	0.679143	0.497047	NA
ENSG00000005882	210.116	PDK2	pyruvate dehydrogenase kinase 2 [Source:HGNC Symbol;Acc:HGNC:8810]	0.0446519	0.0960723	0.464774	0.642094	0.790251	-0.801496	0.105647	-7.58654	3.28572e-14	3.63719e-13
ENSG00000005884	211.869	ITGA3	integrin subunit alpha 3 [Source:HGNC Symbol;Acc:HGNC:6139]	0.0652664	0.108898	0.599336	0.548949	0.722925	-0.275883	0.112407	-2.45433	0.0141147	0.0389492
ENSG00000005889	724.788	ZFX	zinc finger protein X-linked [Source:HGNC Symbol;Acc:HGNC:12869]	0.113231	0.063827	1.77403	0.0760575	0.188654	0.319054	0.0631716	5.0506	4.40425e-07	2.54367e-06
ENSG00000005893	5894.41	LAMP2	lysosomal associated membrane protein 2 [Source:HGNC Symbol;Acc:HGNC:6501]	-0.0886127	0.030169	-2.93721	0.00331177	0.0160694	0.073418	0.0300043	2.44691	0.0144086	0.0396644
ENSG00000005961	4.90737	ITGA2B	integrin subunit alpha 2b [Source:HGNC Symbol;Acc:HGNC:6138]	-0.176793	0.71236	-0.24818	0.803995	NA	-0.255816	0.719006	-0.355792	0.721997	0.832794
ENSG00000005981	0	ASB4	ankyrin repeat and SOCS box containing 4 [Source:HGNC Symbol;Acc:HGNC:16009]	NA	NA	NA	NA	NA	NA	NA	NA	NA	NA
ENSG00000006007	1709.28	GDE1	glycerophosphodiester phosphodiesterase 1 [Source:HGNC Symbol;Acc:HGNC:29644]	-0.0569865	0.0340799	-1.67214	0.0944961	0.220558	-0.104857	0.0343065	-3.05647	0.00223959	0.00752504
ENSG00000006015	772.016	REX1BD	required for excision 1-B domain containing [Source:HGNC Symbol;Acc:HGNC:26098]	0.00785684	0.0744852	0.105482	0.915993	0.959625	-0.0338341	0.0746786	-0.453063	0.650503	0.78425
ENSG00000006016	5.09788	CRLF1	cytokine receptor like factor 1 [Source:HGNC Symbol;Acc:HGNC:2364]	0.0162736	0.591902	0.0274938	0.978066	NA	-0.221309	0.609394	-0.363162	0.716484	0.828735
ENSG00000006025	8.79498	OSBPL7	oxysterol binding protein like 7 [Source:HGNC Symbol;Acc:HGNC:16387]	-0.0822232	0.469203	-0.17524	0.860891	NA	-0.724323	0.510219	-1.41963	0.155715	0.290943
ENSG00000006042	521.471	TMEM98	transmembrane protein 98 [Source:HGNC Symbol;Acc:HGNC:24529]	-0.0102898	0.060136	-0.171108	0.864139	0.929416	-0.0353198	0.0603992	-0.584772	0.558701	0.712919
ENSG00000006047	21.0693	YBX2	Y-box binding protein 2 [Source:HGNC Symbol;Acc:HGNC:17948]	0.242169	0.318382	0.760624	0.446882	NA	-0.0478878	0.325914	-0.146934	0.883184	0.935446
ENSG00000006059	0.330632	KRT33A	keratin 33A [Source:HGNC Symbol;Acc:HGNC:6450]	3.01041	5.89462	0.510705	0.609557	NA	0	5.94781	0	1	NA
ENSG00000006062	407.869	MAP3K14	mitogen-activated protein kinase kinase kinase 14 [Source:HGNC Symbol;Acc:HGNC:6853]	0.344034	0.0817513	4.2083	2.57301e-05	0.000250156	0.230526	0.0824059	2.79745	0.00515079	0.0159868
ENSG00000006071	13.2315	ABCC8	ATP binding cassette subfamily C member 8 [Source:HGNC Symbol;Acc:HGNC:59]	-0.387374	0.368801	-1.05036	0.293552	NA	-0.465349	0.373147	-1.24709	0.212364	0.366719
ENSG00000006116	0	CACNG3	calcium voltage-gated channel auxiliary subunit gamma 3 [Source:HGNC Symbol;Acc:HGNC:1407]	NA	NA	NA	NA	NA	NA	NA	NA	NA	NA
ENSG00000006118	2589.95	TMEM132A	transmembrane protein 132A [Source:HGNC Symbol;Acc:HGNC:31092]	-0.0674042	0.0471179	-1.43054	0.152561	0.311947	-0.273614	0.0474951	-5.7609	8.36651e-09	5.78994e-08
ENSG00000006125	6850.83	AP2B1	adaptor related protein complex 2 subunit beta 1 [Source:HGNC Symbol;Acc:HGNC:563]	-0.239774	0.0276942	-8.65792	4.80438e-18	3.59346e-16	-0.378086	0.0278631	-13.5694	6.07942e-42	2.89197e-40
ENSG00000006128	0.143437	TAC1	tachykinin precursor 1 [Source:HGNC Symbol;Acc:HGNC:11517]	0	5.91921	0	1	NA	0	5.91921	0	1	NA
ENSG00000006194	1028.15	ZNF263	zinc finger protein 263 [Source:HGNC Symbol;Acc:HGNC:13056]	-0.0706617	0.0479088	-1.47492	0.140233	0.293954	-0.441228	0.0495102	-8.91186	5.01821e-19	7.7648e-18
ENSG00000006210	0.111972	CX3CL1	C-X3-C motif chemokine ligand 1 [Source:HGNC Symbol;Acc:HGNC:10647]	0	5.94781	0	1	NA	0	5.94781	0	1	NA
ENSG00000006282	4017.02	SPATA20	spermatogenesis associated 20 [Source:HGNC Symbol;Acc:HGNC:26125]	-0.139666	0.0363494	-3.84233	0.00012187	0.000981818	-0.126941	0.0363534	-3.49187	0.00047965	0.00181553
ENSG00000006283	3.52208	CACNA1G	calcium voltage-gated channel subunit alpha1 G [Source:HGNC Symbol;Acc:HGNC:1394]	-1.30405	0.734653	-1.77506	0.075888	NA	-0.700441	0.67287	-1.04098	0.297887	0.467263
ENSG00000006327	306.719	TNFRSF12A	TNF receptor superfamily member 12A [Source:HGNC Symbol;Acc:HGNC:18152]	0.326264	0.0943287	3.4588	0.000542584	0.00359104	-0.147674	0.0980549	-1.50604	0.132058	0.256054
ENSG00000006377	0	DLX6	distal-less homeobox 6 [Source:HGNC Symbol;Acc:HGNC:2919]	NA	NA	NA	NA	NA	NA	NA	NA	NA	NA
ENSG00000006432	586.572	MAP3K9	mitogen-activated protein kinase kinase kinase 9 [Source:HGNC Symbol;Acc:HGNC:6861]	0.142171	0.0671854	2.1161	0.0343362	0.103292	0.28223	0.0666159	4.23668	2.26853e-05	0.000104982
ENSG00000006451	1284.6	RALA	RAS like proto-oncogene A [Source:HGNC Symbol;Acc:HGNC:9839]	0.00776429	0.0411623	0.188626	0.850386	0.920902	0.30469	0.0402099	7.5775	3.52287e-14	3.89156e-13
ENSG00000006453	1370.85	BAIAP2L1	BAR/IMD domain containing adaptor protein 2 like 1 [Source:HGNC Symbol;Acc:HGNC:21649]	0.15563	0.0392417	3.96592	7.31139e-05	0.000624982	0.199401	0.0391479	5.09352	3.51469e-07	2.05691e-06
ENSG00000006459	529.015	KDM7A	lysine demethylase 7A [Source:HGNC Symbol;Acc:HGNC:22224]	0.0947692	0.067413	1.4058	0.159784	0.321912	0.244731	0.0667568	3.666	0.00024637	0.000975183
ENSG00000006468	4309.39	ETV1	ETS variant transcription factor 1 [Source:HGNC Symbol;Acc:HGNC:3490]	0.0246118	0.0331833	0.741694	0.458273	0.648399	-0.00872665	0.033241	-0.262526	0.792916	0.880318
ENSG00000006530	1235.07	AGK	acylglycerol kinase [Source:HGNC Symbol;Acc:HGNC:21869]	0.00128021	0.0390926	0.0327481	0.973875	0.987376	-0.0911868	0.039515	-2.30765	0.0210185	0.0551535
ENSG00000006534	33.537	ALDH3B1	aldehyde dehydrogenase 3 family member B1 [Source:HGNC Symbol;Acc:HGNC:410]	-0.15999	0.255434	-0.626346	0.531088	0.707616	-0.160989	0.255872	-0.629177	0.529233	0.687407
ENSG00000006555	0.315296	TTC22	tetratricopeptide repeat domain 22 [Source:HGNC Symbol;Acc:HGNC:26067]	-3.03456	2.94814	-1.02931	0.303332	NA	-3.01816	2.94814	-1.02375	0.305953	NA
ENSG00000006576	1312.52	PHTF2	putative homeodomain transcription factor 2 [Source:HGNC Symbol;Acc:HGNC:13411]	0.0673371	0.0482396	1.39589	0.162748	0.325529	0.553635	0.0470358	11.7705	5.54e-32	1.67158e-30
ENSG00000006606	0.257507	CCL26	C-C motif chemokine ligand 26 [Source:HGNC Symbol;Acc:HGNC:10625]	0	3.55621	0	1	NA	0	3.55621	0	1	NA
ENSG00000006607	1887.91	FARP2	FERM, ARH/RhoGEF and pleckstrin domain protein 2 [Source:HGNC Symbol;Acc:HGNC:16460]	-0.041327	0.0443746	-0.931322	0.351687	0.546609	0.0479605	0.0442079	1.08489	0.277972	0.444878
ENSG00000006611	0.255165	USH1C	USH1 protein network component harmonin [Source:HGNC Symbol;Acc:HGNC:12597]	-1.20615	2.95677	-0.407928	0.683327	NA	-0.468401	2.95677	-0.158416	0.874129	NA
ENSG00000006625	1158.52	GGCT	gamma-glutamylcyclotransferase [Source:HGNC Symbol;Acc:HGNC:21705]	-0.00269946	0.0542056	-0.0498004	0.960281	0.980922	-0.0323143	0.0543332	-0.594742	0.552016	0.707278
ENSG00000006634	653.435	DBF4	DBF4 zinc finger [Source:HGNC Symbol;Acc:HGNC:17364]	0.183253	0.068613	2.67082	0.00756659	0.0316312	0.194382	0.0686292	2.83235	0.00462074	0.0145295
ENSG00000006638	3.93995	TBXA2R	thromboxane A2 receptor [Source:HGNC Symbol;Acc:HGNC:11608]	-1.16464	0.779635	-1.49383	0.135221	NA	-1.34027	0.803113	-1.66884	0.0951492	0.197043
ENSG00000006652	750.217	IFRD1	interferon related developmental regulator 1 [Source:HGNC Symbol;Acc:HGNC:5456]	-0.995399	0.0503534	-19.7683	5.58608e-87	6.12793e-84	-0.928673	0.0499886	-18.5777	4.86835e-77	8.03316e-75
ENSG00000006659	0	LGALS14	galectin 14 [Source:HGNC Symbol;Acc:HGNC:30054]	NA	NA	NA	NA	NA	NA	NA	NA	NA	NA
ENSG00000006695	543.342	COX10	cytochrome c oxidase assembly factor heme A:farnesyltransferase COX10 [Source:HGNC Symbol;Acc:HGNC:2260]	0.0570558	0.0558645	1.02132	0.307101	0.500207	-0.0777037	0.0568057	-1.36788	0.171348	0.313446
ENSG00000006704	427.271	GTF2IRD1	GTF2I repeat domain containing 1 [Source:HGNC Symbol;Acc:HGNC:4661]	-0.0266492	0.0798468	-0.333754	0.738565	0.85508	0.21955	0.0785042	2.79666	0.00516331	0.0160185
ENSG00000006712	1801.84	PAF1	PAF1 homolog, Paf1/RNA polymerase II complex component [Source:HGNC Symbol;Acc:HGNC:25459]	0.0797218	0.0331409	2.40554	0.0161485	0.0579981	0.226696	0.0327606	6.91976	4.524e-12	4.20932e-11
ENSG00000006715	1006.34	VPS41	VPS41 subunit of HOPS complex [Source:HGNC Symbol;Acc:HGNC:12713]	-0.156956	0.0485389	-3.23361	0.00122238	0.00702681	-0.435344	0.049856	-8.73203	2.50132e-18	3.68817e-17
ENSG00000006740	454.081	ARHGAP44	Rho GTPase activating protein 44 [Source:HGNC Symbol;Acc:HGNC:29096]	-0.210341	0.06076	-3.46183	0.000536513	0.0035616	-0.566347	0.0636352	-8.89989	5.59028e-19	8.61841e-18
ENSG00000006744	2818.95	ELAC2	elaC ribonuclease Z 2 [Source:HGNC Symbol;Acc:HGNC:14198]	0.0994969	0.0291254	3.41616	0.000635119	0.00410442	0.0724494	0.0292221	2.47927	0.0131652	0.0366691
ENSG00000006747	10.0305	SCIN	scinderin [Source:HGNC Symbol;Acc:HGNC:21695]	-0.167534	0.420151	-0.398747	0.690079	NA	0.310017	0.398417	0.778122	0.436497	0.60633
ENSG00000006756	1075.51	ARSD	arylsulfatase D [Source:HGNC Symbol;Acc:HGNC:717]	-0.112868	0.0429549	-2.6276	0.00859908	0.0349935	-0.370514	0.0441384	-8.39436	4.6842e-17	6.34606e-16
ENSG00000006757	768.418	PNPLA4	patatin like phospholipase domain containing 4 [Source:HGNC Symbol;Acc:HGNC:24887]	-0.0580063	0.056147	-1.03311	0.30155	0.494441	-0.0591413	0.0562251	-1.05187	0.292861	0.461882
ENSG00000006788	1.81939	MYH13	myosin heavy chain 13 [Source:HGNC Symbol;Acc:HGNC:7571]	-1.16067	0.962114	-1.20637	0.227674	NA	-1.60926	1.02002	-1.57768	0.11464	0.229117
ENSG00000006831	1819.16	ADIPOR2	adiponectin receptor 2 [Source:HGNC Symbol;Acc:HGNC:24041]	-0.0913773	0.0372073	-2.4559	0.0140533	0.0520535	-0.144043	0.0374066	-3.85073	0.000117768	0.000490686
ENSG00000006837	15.1272	CDKL3	cyclin dependent kinase like 3 [Source:HGNC Symbol;Acc:HGNC:15483]	-0.0620391	0.355151	-0.174684	0.861328	NA	-0.0211063	0.354328	-0.0595672	0.9525	0.973848
ENSG00000007001	0.901207	UPP2	uridine phosphorylase 2 [Source:HGNC Symbol;Acc:HGNC:23061]	-0.496817	1.42703	-0.348148	0.727729	NA	-0.0785011	1.36701	-0.0574255	0.954206	NA
ENSG00000007038	2.8547	PRSS21	serine protease 21 [Source:HGNC Symbol;Acc:HGNC:9485]	0.199699	0.716297	0.278793	0.780404	NA	-0.961649	0.824168	-1.16681	0.243287	0.403903
ENSG00000007047	275.846	MARK4	microtubule affinity regulating kinase 4 [Source:HGNC Symbol;Acc:HGNC:13538]	-0.0763603	0.0900173	-0.848285	0.396279	0.591789	0.0346281	0.0892438	0.388016	0.698004	0.815722
ENSG00000007062	0.633739	PROM1	prominin 1 [Source:HGNC Symbol;Acc:HGNC:9454]	-0.188671	2.14561	-0.0879337	0.929929	NA	-0.742468	2.22243	-0.334079	0.73832	NA
ENSG00000007080	2621.71	CCDC124	coiled-coil domain containing 124 [Source:HGNC Symbol;Acc:HGNC:25171]	-0.0183751	0.0542403	-0.338771	0.734782	0.852969	-0.23563	0.0545501	-4.31953	1.56365e-05	7.40824e-05
ENSG00000007129	0.260274	CEACAM21	CEA cell adhesion molecule 21 [Source:HGNC Symbol;Acc:HGNC:28834]	-0.496412	3.89273	-0.127523	0.898526	NA	0.241334	3.89273	0.0619963	0.950566	NA
ENSG00000007168	3678.3	PAFAH1B1	platelet activating factor acetylhydrolase 1b regulatory subunit 1 [Source:HGNC Symbol;Acc:HGNC:8574]	0.253541	0.0286957	8.83549	9.96596e-19	7.8558e-17	0.781578	0.0278606	28.0532	3.65463e-173	4.54056e-170
ENSG00000007171	0.295761	NOS2	nitric oxide synthase 2 [Source:HGNC Symbol;Acc:HGNC:7873]	-1.84085	3.13435	-0.587314	0.556993	NA	0.183287	3.08008	0.0595073	0.952548	NA
ENSG00000007174	15.9412	DNAH9	dynein axonemal heavy chain 9 [Source:HGNC Symbol;Acc:HGNC:2953]	0.575664	0.312851	1.84006	0.0657599	NA	-0.0182597	0.33307	-0.0548225	0.95628	0.975503
ENSG00000007202	5193.33	KIAA0100	KIAA0100 [Source:HGNC Symbol;Acc:HGNC:28960]	-0.0812339	0.0300324	-2.70488	0.00683297	0.0290816	-0.292553	0.0303198	-9.6489	4.96865e-22	9.14137e-21
ENSG00000007216	0.0289253	SLC13A2	solute carrier family 13 member 2 [Source:HGNC Symbol;Acc:HGNC:10917]	0	5.94781	0	1	NA	0	5.94781	0	1	NA
ENSG00000007237	2.99813	AC005747.1	growth arrest specific 7 [Source:NCBI gene;Acc:8522]	0.76655	0.761744	1.00631	0.314266	NA	-0.213919	0.842685	-0.253854	0.799608	0.884488
ENSG00000007255	287.083	TRAPPC6A	trafficking protein particle complex 6A [Source:HGNC Symbol;Acc:HGNC:23069]	-0.16819	0.0977951	-1.71982	0.085466	0.2054	-0.193093	0.0980889	-1.96856	0.049004	0.114013
ENSG00000007264	1.19984	MATK	megakaryocyte-associated tyrosine kinase [Source:HGNC Symbol;Acc:HGNC:6906]	2.2753	1.51448	1.50236	0.133004	NA	0.24133	1.70883	0.141225	0.887692	NA
ENSG00000007306	0	CEACAM7	CEA cell adhesion molecule 7 [Source:HGNC Symbol;Acc:HGNC:1819]	NA	NA	NA	NA	NA	NA	NA	NA	NA	NA
ENSG00000007312	0.0289253	CD79B	CD79b molecule [Source:HGNC Symbol;Acc:HGNC:1699]	0	5.94781	0	1	NA	0	5.94781	0	1	NA
ENSG00000007314	0.334649	SCN4A	sodium voltage-gated channel alpha subunit 4 [Source:HGNC Symbol;Acc:HGNC:10591]	0	2.45081	0	1	NA	0.962662	2.45081	0.392793	0.694472	NA
ENSG00000007341	709.185	ST7L	suppression of tumorigenicity 7 like [Source:HGNC Symbol;Acc:HGNC:18441]	-0.035798	0.055749	-0.642128	0.52079	0.699488	0.0388024	0.0554767	0.699436	0.48428	0.649727
ENSG00000007350	2.04429	TKTL1	transketolase like 1 [Source:HGNC Symbol;Acc:HGNC:11835]	0.996714	0.930566	1.07108	0.284132	NA	0.756758	0.948577	0.797782	0.424997	0.596461
ENSG00000007372	0.279111	PAX6	paired box 6 [Source:HGNC Symbol;Acc:HGNC:8620]	0.946238	3.19719	0.29596	0.767261	NA	1.67528	3.19677	0.524053	0.600242	NA
ENSG00000007376	993.608	RPUSD1	RNA pseudouridine synthase domain containing 1 [Source:HGNC Symbol;Acc:HGNC:14173]	0.174801	0.0620704	2.81618	0.00485987	0.0220605	-0.340635	0.0637401	-5.34412	9.08559e-08	5.68246e-07
ENSG00000007384	897.251	RHBDF1	rhomboid 5 homolog 1 [Source:HGNC Symbol;Acc:HGNC:20561]	-0.0638025	0.0633387	-1.00732	0.31378	0.507819	-0.0127873	0.0632164	-0.202278	0.839699	0.907501
ENSG00000007392	661.531	LUC7L	LUC7 like [Source:HGNC Symbol;Acc:HGNC:6723]	0.283208	0.0617782	4.58428	4.55562e-06	5.36406e-05	0.79637	0.0599046	13.294	2.50856e-40	1.10612e-38
ENSG00000007402	80.55	CACNA2D2	calcium voltage-gated channel auxiliary subunit alpha2delta 2 [Source:HGNC Symbol;Acc:HGNC:1400]	0.00680338	0.149519	0.0455017	0.963707	0.981907	-1.01997	0.170095	-5.99647	2.01655e-09	1.48041e-08
ENSG00000007516	160.512	BAIAP3	BAI1 associated protein 3 [Source:HGNC Symbol;Acc:HGNC:948]	-0.0407764	0.107273	-0.380117	0.703858	0.83189	-0.438061	0.11216	-3.90567	9.39649e-05	0.000397403
ENSG00000007520	925.536	TSR3	TSR3 ribosome maturation factor [Source:HGNC Symbol;Acc:HGNC:14175]	-0.000114532	0.0864909	-0.00132421	0.998943	0.999437	-0.116754	0.0868073	-1.34498	0.178631	0.323369
ENSG00000007541	677.26	PIGQ	phosphatidylinositol glycan anchor biosynthesis class Q [Source:HGNC Symbol;Acc:HGNC:14135]	0.059473	0.0641074	0.927709	0.353559	0.548785	-0.125417	0.0650148	-1.92905	0.0537248	0.123152
ENSG00000007545	238.063	CRAMP1	cramped chromatin regulator homolog 1 [Source:HGNC Symbol;Acc:HGNC:14122]	-0.205296	0.0889106	-2.30902	0.0209425	0.0710352	-0.135134	0.0884369	-1.52803	0.126505	0.24756
ENSG00000007866	405.132	TEAD3	TEA domain transcription factor 3 [Source:HGNC Symbol;Acc:HGNC:11716]	-0.00144688	0.0744326	-0.0194388	0.984491	0.992103	-0.0331997	0.0747491	-0.444149	0.656935	0.788091
ENSG00000007908	0.494624	SELE	selectin E [Source:HGNC Symbol;Acc:HGNC:10718]	2.96275	2.03975	1.45251	0.146361	NA	0.962667	2.18562	0.440456	0.659607	NA
ENSG00000007923	1336.23	DNAJC11	DnaJ heat shock protein family (Hsp40) member C11 [Source:HGNC Symbol;Acc:HGNC:25570]	0.0946406	0.0431182	2.19491	0.0281702	0.0891638	0.148195	0.0430039	3.44609	0.00056876	0.00212165
ENSG00000007933	0.693342	FMO3	flavin containing dimethylaniline monoxygenase 3 [Source:HGNC Symbol;Acc:HGNC:3771]	-0.102957	1.63128	-0.0631143	0.949675	NA	-0.0627051	1.62858	-0.038503	0.969287	NA
ENSG00000007944	405.652	MYLIP	myosin regulatory light chain interacting protein [Source:HGNC Symbol;Acc:HGNC:21155]	0.0235061	0.068345	0.343933	0.730897	0.850184	0.357563	0.0662048	5.40086	6.63222e-08	4.21038e-07
ENSG00000007952	24.9651	NOX1	NADPH oxidase 1 [Source:HGNC Symbol;Acc:HGNC:7889]	0.273201	0.275281	0.992442	0.320982	0.515734	0.115638	0.279964	0.413047	0.679572	0.803492
ENSG00000007968	253.775	E2F2	E2F transcription factor 2 [Source:HGNC Symbol;Acc:HGNC:3114]	0.455743	0.0911452	5.00018	5.72761e-07	8.24926e-06	-0.103029	0.095259	-1.08157	0.279443	0.446657
ENSG00000008018	4735.78	PSMB1	proteasome 20S subunit beta 1 [Source:HGNC Symbol;Acc:HGNC:9537]	-0.0236003	0.0321447	-0.734188	0.462834	0.652468	0.259164	0.0318196	8.14477	3.79989e-16	4.81738e-15
ENSG00000008056	1.07493	SYN1	synapsin I [Source:HGNC Symbol;Acc:HGNC:11494]	-0.114381	1.36803	-0.0836103	0.933366	NA	-0.0733648	1.36478	-0.0537558	0.95713	NA
ENSG00000008083	626.705	JARID2	jumonji and AT-rich interaction domain containing 2 [Source:HGNC Symbol;Acc:HGNC:6196]	-0.0982711	0.0606792	-1.61952	0.105336	0.239035	0.205139	0.0591925	3.46563	0.000528991	0.00198628
ENSG00000008086	208.507	CDKL5	cyclin dependent kinase like 5 [Source:HGNC Symbol;Acc:HGNC:11411]	-0.156794	0.0979284	-1.60111	0.109352	0.245231	-0.144226	0.0979761	-1.47205	0.141006	0.269593
ENSG00000008118	0.203492	CAMK1G	calcium/calmodulin dependent protein kinase IG [Source:HGNC Symbol;Acc:HGNC:14585]	-0.49641	4.18619	-0.118583	0.905606	NA	-0.480006	4.18619	-0.114664	0.908711	NA
ENSG00000008128	10.8716	CDK11A	cyclin dependent kinase 11A [Source:HGNC Symbol;Acc:HGNC:1730]	-0.189142	0.442202	-0.427728	0.668849	NA	0.303764	0.42339	0.717458	0.473092	0.639499
ENSG00000008130	2688.53	NADK	NAD kinase [Source:HGNC Symbol;Acc:HGNC:29831]	-0.148465	0.0347122	-4.27703	1.89404e-05	0.00018975	-0.251084	0.0349743	-7.17909	7.01778e-13	6.98175e-12
ENSG00000008196	0.344507	TFAP2B	transcription factor AP-2 beta [Source:HGNC Symbol;Acc:HGNC:11743]	2.27689	3.00799	0.756947	0.449082	NA	2.26524	3.01013	0.752538	0.451727	NA
ENSG00000008197	0.0367833	TFAP2D	transcription factor AP-2 delta [Source:HGNC Symbol;Acc:HGNC:15581]	0	5.94781	0	1	NA	0	5.94781	0	1	NA
ENSG00000008226	24.2588	DLEC1	DLEC1 cilia and flagella associated protein [Source:HGNC Symbol;Acc:HGNC:2899]	-0.500671	0.272852	-1.83495	0.066513	NA	0.188962	0.25537	0.739953	0.459328	0.626773
ENSG00000008256	1698.41	CYTH3	cytohesin 3 [Source:HGNC Symbol;Acc:HGNC:9504]	0.0767222	0.0402758	1.90492	0.0567906	0.151518	0.345079	0.0395437	8.72654	2.62593e-18	3.86228e-17
ENSG00000008277	272.679	ADAM22	ADAM metallopeptidase domain 22 [Source:HGNC Symbol;Acc:HGNC:201]	-0.0481997	0.085838	-0.56152	0.574443	0.742316	0.0648971	0.0850182	0.763331	0.445266	0.614109
ENSG00000008282	2825.74	SYPL1	synaptophysin like 1 [Source:HGNC Symbol;Acc:HGNC:11507]	-0.00301559	0.0445888	-0.067631	0.946079	0.974608	0.0490081	0.0445357	1.10042	0.271148	0.436902
ENSG00000008283	5116.26	CYB561	cytochrome b561 [Source:HGNC Symbol;Acc:HGNC:2571]	-0.00557339	0.025222	-0.220974	0.825113	0.907604	-0.291298	0.0256831	-11.342	8.12557e-30	2.18903e-28
ENSG00000008294	1911.97	SPAG9	sperm associated antigen 9 [Source:HGNC Symbol;Acc:HGNC:14524]	0.00520429	0.0402923	0.129163	0.897228	0.949208	0.265537	0.0397098	6.68693	2.27906e-11	1.98254e-10
ENSG00000008300	140.021	CELSR3	cadherin EGF LAG seven-pass G-type receptor 3 [Source:HGNC Symbol;Acc:HGNC:3230]	0.00753149	0.113124	0.0665776	0.946918	0.97476	-0.211961	0.115939	-1.8282	0.0675191	0.14903
ENSG00000008311	325.177	AASS	aminoadipate-semialdehyde synthase [Source:HGNC Symbol;Acc:HGNC:17366]	-0.112377	0.0883255	-1.2723	0.203265	0.379544	-0.400641	0.090488	-4.42756	9.53049e-06	4.64452e-05
ENSG00000008323	48.8657	PLEKHG6	pleckstrin homology and RhoGEF domain containing G6 [Source:HGNC Symbol;Acc:HGNC:25562]	-0.292036	0.188898	-1.546	0.122105	0.265915	-0.420707	0.192232	-2.18854	0.0286302	0.0723843
ENSG00000008324	334.791	SS18L2	SS18 like 2 [Source:HGNC Symbol;Acc:HGNC:15593]	-0.0804286	0.0779067	-1.03237	0.301899	0.494733	-0.072081	0.0779611	-0.924576	0.355187	0.528265
ENSG00000008382	173.941	MPND	MPN domain containing [Source:HGNC Symbol;Acc:HGNC:25934]	0.0390143	0.11257	0.346577	0.728909	0.849222	-0.0726533	0.113835	-0.638232	0.523323	0.682543
ENSG00000008394	6096.92	MGST1	microsomal glutathione S-transferase 1 [Source:HGNC Symbol;Acc:HGNC:7061]	-0.0865969	0.0307847	-2.81298	0.00490844	0.0222502	0.0113025	0.0306993	0.368167	0.712749	0.825825
ENSG00000008405	675.082	CRY1	cryptochrome circadian regulator 1 [Source:HGNC Symbol;Acc:HGNC:2384]	-0.074836	0.0585757	-1.27759	0.201393	0.376796	0.0742756	0.0579569	1.28156	0.199995	0.35154
ENSG00000008438	1.03104	PGLYRP1	peptidoglycan recognition protein 1 [Source:HGNC Symbol;Acc:HGNC:8904]	-0.246009	1.21069	-0.203198	0.838981	NA	0.0394849	1.18092	0.0334358	0.973327	NA
ENSG00000008441	12833.1	NFIX	nuclear factor I X [Source:HGNC Symbol;Acc:HGNC:7788]	0.0874362	0.0303114	2.8846	0.00391914	0.0184783	0.182826	0.0302716	6.03951	1.54579e-09	1.14556e-08
ENSG00000008513	11424.8	ST3GAL1	ST3 beta-galactoside alpha-2,3-sialyltransferase 1 [Source:HGNC Symbol;Acc:HGNC:10862]	0.148321	0.0183376	8.08837	6.04666e-16	3.6181e-14	-0.240753	0.0187283	-12.8551	8.05589e-38	3.17441e-36
ENSG00000008516	4.5833	MMP25	matrix metallopeptidase 25 [Source:HGNC Symbol;Acc:HGNC:14246]	-0.377723	0.612806	-0.616383	0.537642	NA	-0.869587	0.653513	-1.33064	0.183309	0.329616
ENSG00000008517	32.5147	IL32	interleukin 32 [Source:HGNC Symbol;Acc:HGNC:16830]	-1.01324	0.247234	-4.09828	4.16229e-05	0.000381032	-0.131835	0.221571	-0.595002	0.551842	0.707201
ENSG00000008710	1580.3	PKD1	polycystin 1, transient receptor potential channel interacting [Source:HGNC Symbol;Acc:HGNC:9008]	-0.513196	0.060518	-8.48006	2.25071e-17	1.59292e-15	-0.297508	0.0600672	-4.95292	7.31076e-07	4.10145e-06
ENSG00000008735	695.305	MAPK8IP2	mitogen-activated protein kinase 8 interacting protein 2 [Source:HGNC Symbol;Acc:HGNC:6883]	0.118415	0.060754	1.94909	0.0512851	0.140628	0.462092	0.0593675	7.78359	7.04963e-15	8.18106e-14
ENSG00000008838	1947.21	MED24	mediator complex subunit 24 [Source:HGNC Symbol;Acc:HGNC:22963]	0.0738709	0.0340205	2.17137	0.0299035	0.0932158	0.229155	0.0336456	6.81085	9.70257e-12	8.75386e-11
ENSG00000008853	356.282	RHOBTB2	Rho related BTB domain containing 2 [Source:HGNC Symbol;Acc:HGNC:18756]	0.156373	0.0722359	2.16475	0.0304067	0.0943593	-0.0297451	0.0735883	-0.404209	0.686059	0.80738
ENSG00000008869	1056.91	HEATR5B	HEAT repeat containing 5B [Source:HGNC Symbol;Acc:HGNC:29273]	-0.0631405	0.0502808	-1.25576	0.209203	0.387553	0.0239782	0.0500325	0.479252	0.631759	0.771567
ENSG00000008952	2924.73	SEC62	SEC62 homolog, preprotein translocation factor [Source:HGNC Symbol;Acc:HGNC:11846]	-0.0550319	0.0377637	-1.45727	0.145042	0.3013	0.163096	0.0374263	4.35779	1.31381e-05	6.29318e-05
ENSG00000008988	9708.77	RPS20	ribosomal protein S20 [Source:HGNC Symbol;Acc:HGNC:10405]	-0.134104	0.0418418	-3.20502	0.00135051	0.00764322	0.0232366	0.0417748	0.556236	0.57805	0.729941
ENSG00000009307	20003.9	CSDE1	cold shock domain containing E1 [Source:HGNC Symbol;Acc:HGNC:29905]	-0.0412251	0.0231473	-1.78098	0.074915	0.186615	0.173183	0.0230687	7.50729	6.0366e-14	6.53506e-13
ENSG00000009335	5153.17	UBE3C	ubiquitin protein ligase E3C [Source:HGNC Symbol;Acc:HGNC:16803]	-0.0931843	0.0229329	-4.06334	4.83756e-05	0.00043439	-0.22212	0.0231703	-9.58642	9.11978e-22	1.66194e-20
ENSG00000009413	797.714	REV3L	REV3 like, DNA directed polymerase zeta catalytic subunit [Source:HGNC Symbol;Acc:HGNC:9968]	0.158975	0.0618893	2.5687	0.0102081	0.0400533	0.64572	0.0603185	10.7052	9.62552e-27	2.22917e-25
ENSG00000009694	127.414	TENM1	teneurin transmembrane protein 1 [Source:HGNC Symbol;Acc:HGNC:8117]	-0.144634	0.151482	-0.954799	0.339679	0.534745	0.0535221	0.150052	0.35669	0.721324	0.8322
ENSG00000009709	0.036491	PAX7	paired box 7 [Source:HGNC Symbol;Acc:HGNC:8621]	0	5.94781	0	1	NA	0	5.94781	0	1	NA
ENSG00000009724	26.7662	MASP2	mannan binding lectin serine peptidase 2 [Source:HGNC Symbol;Acc:HGNC:6902]	-0.274273	0.288071	-0.9521	0.341046	0.536448	0.0632147	0.279851	0.225887	0.821289	0.897385
ENSG00000009765	376.385	IYD	iodotyrosine deiodinase [Source:HGNC Symbol;Acc:HGNC:21071]	-0.105133	0.0792483	-1.32663	0.184632	0.355129	-0.175434	0.0798117	-2.1981	0.027942	0.0708649
ENSG00000009780	229.854	FAM76A	family with sequence similarity 76 member A [Source:HGNC Symbol;Acc:HGNC:28530]	0.158639	0.0938743	1.68991	0.0910444	0.214671	0.0612222	0.0948565	0.64542	0.518655	0.678466
ENSG00000009790	5.91408	TRAF3IP3	TRAF3 interacting protein 3 [Source:HGNC Symbol;Acc:HGNC:30766]	-0.179994	0.546992	-0.329062	0.742109	NA	-0.371676	0.560309	-0.663342	0.507112	0.669037
ENSG00000009830	442.463	POMT2	protein O-mannosyltransferase 2 [Source:HGNC Symbol;Acc:HGNC:19743]	-0.0353899	0.0707105	-0.500491	0.616729	0.771879	-0.406424	0.0730859	-5.56092	2.68364e-08	1.77018e-07
ENSG00000009844	9156.91	VTA1	vesicle trafficking 1 [Source:HGNC Symbol;Acc:HGNC:20954]	0.214466	0.0356931	6.0086	1.8713e-09	4.55338e-08	0.642299	0.0354732	18.1066	2.82719e-73	4.17574e-71
ENSG00000009950	19.3603	MLXIPL	MLX interacting protein like [Source:HGNC Symbol;Acc:HGNC:12744]	0.487714	0.307299	1.5871	0.11249	NA	-1.03196	0.37207	-2.77356	0.00554464	0.0170762
ENSG00000009954	3749.65	BAZ1B	bromodomain adjacent to zinc finger domain 1B [Source:HGNC Symbol;Acc:HGNC:961]	0.0662374	0.0320658	2.06567	0.0388593	0.1135	0.0981813	0.0320415	3.06419	0.00218263	0.00734884
ENSG00000010017	1533.46	RANBP9	RAN binding protein 9 [Source:HGNC Symbol;Acc:HGNC:13727]	-0.0678186	0.0356979	-1.89979	0.0574606	0.152718	0.0393938	0.035368	1.11383	0.265354	0.430225
ENSG00000010030	7.43592	ETV7	ETS variant transcription factor 7 [Source:HGNC Symbol;Acc:HGNC:18160]	-0.900542	0.477149	-1.88734	0.0591146	NA	-0.825157	0.473211	-1.74374	0.0812044	0.17356
ENSG00000010072	521.716	SPRTN	SprT-like N-terminal domain [Source:HGNC Symbol;Acc:HGNC:25356]	0.224216	0.0714605	3.13763	0.00170321	0.00929948	0.517264	0.07026	7.36214	1.80988e-13	1.8868e-12
ENSG00000010165	1514.27	EEF1AKNMT	eEF1A lysine and N-terminal methyltransferase [Source:HGNC Symbol;Acc:HGNC:24248]	0.229621	0.0359922	6.37975	1.77379e-10	5.28284e-09	-0.104566	0.0371326	-2.81602	0.00486229	0.0151828
ENSG00000010219	208.24	DYRK4	dual specificity tyrosine phosphorylation regulated kinase 4 [Source:HGNC Symbol;Acc:HGNC:3095]	-0.158145	0.0893917	-1.76913	0.0768724	0.19018	-0.157019	0.0895643	-1.75314	0.0795781	0.17081
ENSG00000010244	3519.25	ZNF207	zinc finger protein 207 [Source:HGNC Symbol;Acc:HGNC:12998]	0.161348	0.033128	4.87042	1.11359e-06	1.51283e-05	0.0777593	0.0332778	2.33667	0.0194562	0.0515602
ENSG00000010256	4891.12	UQCRC1	ubiquinol-cytochrome c reductase core protein 1 [Source:HGNC Symbol;Acc:HGNC:12585]	0.00262784	0.026782	0.0981196	0.921837	0.962689	0.222977	0.0264962	8.41544	3.91406e-17	5.33348e-16
ENSG00000010270	927.899	STARD3NL	STARD3 N-terminal like [Source:HGNC Symbol;Acc:HGNC:19169]	0.00532788	0.0507925	0.104895	0.916459	0.959625	0.0653092	0.0506383	1.28972	0.197148	0.347563
ENSG00000010278	8498.71	CD9	CD9 molecule [Source:HGNC Symbol;Acc:HGNC:1709]	-0.114388	0.0219806	-5.20405	1.9499e-07	3.08515e-06	-0.100517	0.0219824	-4.57261	4.81679e-06	2.44263e-05
ENSG00000010282	0.130676	HHATL	hedgehog acyltransferase like [Source:HGNC Symbol;Acc:HGNC:13242]	-0.496398	5.36003	-0.0926111	0.926213	NA	0.241344	5.36003	0.0450266	0.964086	NA
ENSG00000010292	3519.18	NCAPD2	non-SMC condensin I complex subunit D2 [Source:HGNC Symbol;Acc:HGNC:24305]	-0.10563	0.0406483	-2.59864	0.00935947	0.0373019	0.388219	0.0400913	9.68338	3.54785e-22	6.57317e-21
ENSG00000010295	1.64011	IFFO1	intermediate filament family orphan 1 [Source:HGNC Symbol;Acc:HGNC:24970]	0.66104	1.33933	0.493559	0.621618	NA	0.914145	1.32194	0.691517	0.489241	0.653754
ENSG00000010310	0.302715	GIPR	gastric inhibitory polypeptide receptor [Source:HGNC Symbol;Acc:HGNC:4271]	-1.20627	2.90869	-0.414713	0.678352	NA	0.818621	2.85006	0.287229	0.773937	NA
ENSG00000010318	236.081	PHF7	PHD finger protein 7 [Source:HGNC Symbol;Acc:HGNC:18458]	0.0467316	0.0928505	0.503299	0.614754	0.770799	0.531385	0.0890174	5.96945	2.3806e-09	1.73621e-08
ENSG00000010319	61.2172	SEMA3G	semaphorin 3G [Source:HGNC Symbol;Acc:HGNC:30400]	0.15429	0.166025	0.929321	0.352723	0.547746	-0.928429	0.190352	-4.87744	1.0747e-06	5.9019e-06
ENSG00000010322	1614.38	NISCH	nischarin [Source:HGNC Symbol;Acc:HGNC:18006]	-0.079303	0.0412069	-1.92451	0.0542908	0.146602	-0.357515	0.0421044	-8.49117	2.04574e-17	2.85014e-16
ENSG00000010327	4.00221	STAB1	stabilin 1 [Source:HGNC Symbol;Acc:HGNC:18628]	-0.536849	0.934854	-0.57426	0.565792	NA	-0.210557	0.910296	-0.231306	0.817077	0.894847
ENSG00000010361	73.2486	FUZ	fuzzy planar cell polarity protein [Source:HGNC Symbol;Acc:HGNC:26219]	-0.200526	0.165672	-1.21038	0.226132	0.408902	-0.349911	0.168638	-2.07493	0.0379935	0.0921732
ENSG00000010379	0.707703	SLC6A13	solute carrier family 6 member 13 [Source:HGNC Symbol;Acc:HGNC:11046]	-0.452102	1.73009	-0.261317	0.793848	NA	-0.485311	1.73686	-0.279418	0.779924	NA
ENSG00000010404	147.367	IDS	iduronate 2-sulfatase [Source:HGNC Symbol;Acc:HGNC:5389]	0.0426188	0.127745	0.333623	0.738664	0.85508	0.160407	0.12672	1.26584	0.205571	0.358387
ENSG00000010438	1.13893	PRSS3	serine protease 3 [Source:HGNC Symbol;Acc:HGNC:9486]	-0.0651115	1.22142	-0.0533079	0.957487	NA	-1.35232	1.45139	-0.931741	0.351471	NA
ENSG00000010539	307.923	ZNF200	zinc finger protein 200 [Source:HGNC Symbol;Acc:HGNC:12993]	0.123014	0.0767435	1.60293	0.10895	0.244581	0.121045	0.0768761	1.57454	0.115362	0.23019
ENSG00000010610	68.5287	CD4	CD4 molecule [Source:HGNC Symbol;Acc:HGNC:1678]	-0.0589253	0.233758	-0.252078	0.80098	0.894019	2.24572	0.197861	11.35	7.41393e-30	2.00756e-28
ENSG00000010626	150.049	LRRC23	leucine rich repeat containing 23 [Source:HGNC Symbol;Acc:HGNC:19138]	-0.117328	0.113572	-1.03307	0.30157	0.494441	-0.325435	0.116259	-2.79923	0.00512248	0.0159106
ENSG00000010671	1.54321	BTK	Bruton tyrosine kinase [Source:HGNC Symbol;Acc:HGNC:1133]	-0.258133	1.10463	-0.233684	0.815231	NA	-1.55775	1.35586	-1.1489	0.250598	0.412572
ENSG00000010704	128.181	HFE	homeostatic iron regulator [Source:HGNC Symbol;Acc:HGNC:4886]	-0.285892	0.124578	-2.29488	0.0217403	0.0732558	-0.377533	0.126202	-2.99149	0.00277615	0.00915315
ENSG00000010803	1772.43	SCMH1	Scm polycomb group protein homolog 1 [Source:HGNC Symbol;Acc:HGNC:19003]	-0.100681	0.0310405	-3.24355	0.00118049	0.00684082	-0.367369	0.0320366	-11.4672	1.92857e-30	5.39515e-29
ENSG00000010810	19.299	FYN	FYN proto-oncogene, Src family tyrosine kinase [Source:HGNC Symbol;Acc:HGNC:4037]	-0.927303	0.319875	-2.89896	0.00374406	NA	-1.04023	0.325111	-3.19962	0.00137611	0.00480091
ENSG00000010818	804.104	HIVEP2	HIVEP zinc finger 2 [Source:HGNC Symbol;Acc:HGNC:4921]	0.0243818	0.0568398	0.428957	0.667955	0.808369	-0.114723	0.0574911	-1.99548	0.0459902	0.108073
ENSG00000010932	5.13823	FMO1	flavin containing dimethylaniline monoxygenase 1 [Source:HGNC Symbol;Acc:HGNC:3769]	0.219	0.597428	0.366571	0.713939	NA	0.545759	0.581124	0.939144	0.347657	0.520106
ENSG00000011007	1591.67	ELOA	elongin A [Source:HGNC Symbol;Acc:HGNC:11620]	0.0783807	0.0400803	1.95559	0.050513	0.13922	0.0277303	0.0402645	0.688705	0.491009	0.655247
ENSG00000011009	736.424	LYPLA2	lysophospholipase 2 [Source:HGNC Symbol;Acc:HGNC:6738]	-0.0354388	0.0526438	-0.673181	0.500832	0.683562	0.2084	0.0516127	4.03776	5.39631e-05	0.00023735
ENSG00000011021	260.363	CLCN6	chloride voltage-gated channel 6 [Source:HGNC Symbol;Acc:HGNC:2024]	-0.0359892	0.0920932	-0.390791	0.695952	0.826329	0.716936	0.0867577	8.26366	1.41271e-16	1.85213e-15
ENSG00000011028	0.603617	MRC2	mannose receptor C type 2 [Source:HGNC Symbol;Acc:HGNC:16875]	-2.15816	2.29883	-0.938808	0.347829	NA	-1.42041	2.29883	-0.617884	0.536652	NA
ENSG00000011052	0	NME1-NME2	NME1-NME2 readthrough [Source:HGNC Symbol;Acc:HGNC:33531]	NA	NA	NA	NA	NA	NA	NA	NA	NA	NA
ENSG00000011083	0.0989072	SLC6A7	solute carrier family 6 member 7 [Source:HGNC Symbol;Acc:HGNC:11054]	0	5.94781	0	1	NA	0	5.94781	0	1	NA
ENSG00000011105	750.009	TSPAN9	tetraspanin 9 [Source:HGNC Symbol;Acc:HGNC:21640]	-0.192732	0.0573644	-3.35979	0.00078003	0.00486189	-0.740969	0.0602363	-12.301	8.94353e-35	3.08654e-33
ENSG00000011114	1344.47	BTBD7	BTB domain containing 7 [Source:HGNC Symbol;Acc:HGNC:18269]	0.0808113	0.0429174	1.88295	0.0597075	0.156884	0.169915	0.0426802	3.98112	6.85911e-05	0.000297233
ENSG00000011132	186.491	APBA3	amyloid beta precursor protein binding family A member 3 [Source:HGNC Symbol;Acc:HGNC:580]	-0.114294	0.0959197	-1.19156	0.233432	0.417699	-0.162033	0.0966601	-1.67632	0.0936765	0.194674
ENSG00000011143	419.022	MKS1	MKS transition zone complex subunit 1 [Source:HGNC Symbol;Acc:HGNC:7121]	-0.191748	0.0658106	-2.91363	0.00357253	0.0170828	-0.209611	0.0660613	-3.17299	0.0015088	0.00522587
ENSG00000011198	1011.29	ABHD5	abhydrolase domain containing 5 [Source:HGNC Symbol;Acc:HGNC:21396]	0.077755	0.0493231	1.57644	0.114924	0.254007	0.0773244	0.04938	1.56591	0.11737	0.233338
ENSG00000011201	3.00645	ANOS1	anosmin 1 [Source:HGNC Symbol;Acc:HGNC:6211]	0.532988	0.827576	0.644035	0.519553	NA	-0.385207	0.891602	-0.432039	0.665713	0.793662
ENSG00000011243	711.969	AKAP8L	A-kinase anchoring protein 8 like [Source:HGNC Symbol;Acc:HGNC:29857]	0.57758	0.0586777	9.84327	7.32925e-23	8.04019e-21	0.801259	0.0578772	13.8441	1.38081e-43	7.14804e-42
ENSG00000011258	540.389	MBTD1	mbt domain containing 1 [Source:HGNC Symbol;Acc:HGNC:19866]	-0.147742	0.055401	-2.66678	0.00765829	0.031893	0.0126035	0.0544559	0.231444	0.81697	0.894818
ENSG00000011260	1615.48	UTP18	UTP18 small subunit processome component [Source:HGNC Symbol;Acc:HGNC:24274]	0.104324	0.0364736	2.86026	0.004233	0.0196347	0.332636	0.0358406	9.28097	1.67941e-20	2.85252e-19
ENSG00000011275	751.545	RNF216	ring finger protein 216 [Source:HGNC Symbol;Acc:HGNC:21698]	0.035978	0.0587611	0.612275	0.540356	0.715402	-0.0818694	0.0593474	-1.37949	0.167742	0.308345
ENSG00000011295	1755.22	TTC19	tetratricopeptide repeat domain 19 [Source:HGNC Symbol;Acc:HGNC:26006]	-0.0952986	0.0357077	-2.66885	0.00761117	0.031747	-0.273165	0.0363242	-7.52019	5.46974e-14	5.94272e-13
ENSG00000011304	9370.58	PTBP1	polypyrimidine tract binding protein 1 [Source:HGNC Symbol;Acc:HGNC:9583]	0.199471	0.028064	7.10774	1.17957e-12	4.76314e-11	0.506209	0.0278856	18.153	1.21492e-73	1.80707e-71
ENSG00000011332	86.6369	DPF1	double PHD fingers 1 [Source:HGNC Symbol;Acc:HGNC:20225]	0.0981276	0.158752	0.61812	0.536496	0.712155	-0.282833	0.164491	-1.71945	0.0855327	0.180943
ENSG00000011347	1752.12	SYT7	synaptotagmin 7 [Source:HGNC Symbol;Acc:HGNC:11514]	0.0275414	0.0392797	0.701161	0.483202	0.668862	-0.529074	0.0411091	-12.87	6.64194e-38	2.63198e-36
ENSG00000011376	1973.95	LARS2	leucyl-tRNA synthetase 2, mitochondrial [Source:HGNC Symbol;Acc:HGNC:17095]	0.0112016	0.0328075	0.341434	0.732777	0.851618	-0.0273357	0.0329653	-0.829227	0.406976	0.578137
ENSG00000011405	2605.96	PIK3C2A	phosphatidylinositol-4-phosphate 3-kinase catalytic subunit type 2 alpha [Source:HGNC Symbol;Acc:HGNC:8971]	-0.0668334	0.0470823	-1.4195	0.155753	0.31644	-0.00910271	0.0470143	-0.193616	0.846477	0.911979
ENSG00000011422	9.11966	PLAUR	plasminogen activator, urokinase receptor [Source:HGNC Symbol;Acc:HGNC:9053]	-0.136934	0.439933	-0.311261	0.755602	NA	-0.821108	0.479554	-1.71223	0.086854	0.183115
ENSG00000011426	2499.53	ANLN	anillin actin binding protein [Source:HGNC Symbol;Acc:HGNC:14082]	0.369822	0.0513182	7.20646	5.74238e-13	2.43847e-11	0.979036	0.0506798	19.3181	3.78517e-83	7.33455e-81
ENSG00000011451	2159.24	WIZ	WIZ zinc finger [Source:HGNC Symbol;Acc:HGNC:30917]	0.0496263	0.0409194	1.21278	0.225213	0.407843	0.202501	0.0406437	4.98236	6.28149e-07	3.54926e-06
ENSG00000011454	1883.31	RABGAP1	RAB GTPase activating protein 1 [Source:HGNC Symbol;Acc:HGNC:17155]	-0.154014	0.0354241	-4.34772	1.37557e-05	0.000143033	0.0694943	0.03483	1.99524	0.0460165	0.108101
ENSG00000011465	0.0598489	DCN	decorin [Source:HGNC Symbol;Acc:HGNC:2705]	-0.496372	5.94781	-0.0834547	0.93349	NA	-0.479968	5.94781	-0.0806966	0.935683	NA
ENSG00000011478	221.649	QPCTL	glutaminyl-peptide cyclotransferase like [Source:HGNC Symbol;Acc:HGNC:25952]	0.0640264	0.0947902	0.675454	0.499387	0.682688	-0.206246	0.0974034	-2.11744	0.0342227	0.0842695
ENSG00000011485	1634.91	PPP5C	protein phosphatase 5 catalytic subunit [Source:HGNC Symbol;Acc:HGNC:9322]	0.0585899	0.0474997	1.23348	0.217397	0.397806	0.322002	0.0469436	6.85933	6.91863e-12	6.3177e-11
ENSG00000011523	214.229	CEP68	centrosomal protein 68 [Source:HGNC Symbol;Acc:HGNC:29076]	-0.00206585	0.093745	-0.022037	0.982418	0.991758	-0.0566627	0.0944313	-0.600041	0.548479	0.704134
ENSG00000011566	412.414	MAP4K3	mitogen-activated protein kinase kinase kinase kinase 3 [Source:HGNC Symbol;Acc:HGNC:6865]	0.0969264	0.0689143	1.40648	0.159582	0.321661	0.120147	0.0688706	1.74453	0.0810668	0.173353
ENSG00000011590	43.3287	ZBTB32	zinc finger and BTB domain containing 32 [Source:HGNC Symbol;Acc:HGNC:16763]	0.312543	0.210736	1.4831	0.138047	0.290295	0.418466	0.209041	2.00183	0.0453029	0.106871
ENSG00000011600	0	TYROBP	TYRO protein tyrosine kinase binding protein [Source:HGNC Symbol;Acc:HGNC:12449]	NA	NA	NA	NA	NA	NA	NA	NA	NA	NA
ENSG00000011638	435.784	TMEM159	transmembrane protein 159 [Source:HGNC Symbol;Acc:HGNC:30136]	0.140227	0.0687955	2.03831	0.041519	0.119727	-0.1262	0.0706283	-1.78682	0.0739672	0.16076
ENSG00000011677	77.2369	GABRA3	gamma-aminobutyric acid type A receptor alpha3 subunit [Source:HGNC Symbol;Acc:HGNC:4077]	-0.254939	0.159138	-1.60199	0.109157	0.245002	-0.320877	0.160656	-1.9973	0.0457926	0.107696
ENSG00000012048	1200.45	BRCA1	BRCA1 DNA repair associated [Source:HGNC Symbol;Acc:HGNC:1100]	0.0531176	0.056394	0.941901	0.346243	0.541452	-0.0861535	0.0567818	-1.51727	0.129198	0.25178
ENSG00000012061	398.995	ERCC1	ERCC excision repair 1, endonuclease non-catalytic subunit [Source:HGNC Symbol;Acc:HGNC:3433]	-0.0571808	0.0707403	-0.808321	0.418906	0.612108	-0.200048	0.0718957	-2.78248	0.00539456	0.0166625
ENSG00000012124	0.627438	CD22	CD22 molecule [Source:HGNC Symbol;Acc:HGNC:1643]	0.278344	1.66423	0.167251	0.867173	NA	0.253989	1.67004	0.152086	0.879119	NA
ENSG00000012171	211.14	SEMA3B	semaphorin 3B [Source:HGNC Symbol;Acc:HGNC:10724]	-0.364683	0.0972355	-3.75051	0.000176473	0.00135063	-0.618024	0.100262	-6.16407	7.08988e-10	5.42359e-09
ENSG00000012174	1693.05	MBTPS2	membrane bound transcription factor peptidase, site 2 [Source:HGNC Symbol;Acc:HGNC:15455]	-0.0105113	0.0432365	-0.243111	0.807919	0.898264	0.284769	0.0425793	6.68797	2.26288e-11	1.96928e-10
ENSG00000012211	245.901	PRICKLE3	prickle planar cell polarity protein 3 [Source:HGNC Symbol;Acc:HGNC:6645]	0.151474	0.083482	1.81445	0.0696084	0.176386	-0.479181	0.0894499	-5.35698	8.46264e-08	5.32914e-07
ENSG00000012223	19.9581	LTF	lactotransferrin [Source:HGNC Symbol;Acc:HGNC:6720]	-0.78295	0.303547	-2.57934	0.00989892	NA	-2.89989	0.432	-6.7127	1.91054e-11	1.67091e-10
ENSG00000012232	1059.55	EXTL3	exostosin like glycosyltransferase 3 [Source:HGNC Symbol;Acc:HGNC:3518]	0.216238	0.0460183	4.69895	2.61501e-06	3.26294e-05	0.217764	0.0460699	4.72681	2.28071e-06	1.20217e-05
ENSG00000012504	0.127366	NR1H4	nuclear receptor subfamily 1 group H member 4 [Source:HGNC Symbol;Acc:HGNC:7967]	-0.496398	5.40533	-0.0918349	0.926829	NA	-0.479993	5.40533	-0.0888	0.929241	NA
ENSG00000012660	14966.7	ELOVL5	ELOVL fatty acid elongase 5 [Source:HGNC Symbol;Acc:HGNC:21308]	-0.0981659	0.0297971	-3.29447	0.000986059	0.00591097	-0.149058	0.0298204	-4.99852	5.77708e-07	3.28269e-06
ENSG00000012779	1.04212	ALOX5	arachidonate 5-lipoxygenase [Source:HGNC Symbol;Acc:HGNC:435]	0.498002	1.34678	0.369772	0.711553	NA	-0.504704	1.47186	-0.342903	0.731671	NA
ENSG00000012817	959.22	KDM5D	lysine demethylase 5D [Source:HGNC Symbol;Acc:HGNC:11115]	0.0952531	0.047616	2.00045	0.0454522	0.12848	0.404274	0.0465194	8.69043	3.61072e-18	5.28131e-17
ENSG00000012822	336.079	CALCOCO1	calcium binding and coiled-coil domain 1 [Source:HGNC Symbol;Acc:HGNC:29306]	-0.341506	0.0920812	-3.70875	0.000208288	0.00156056	-0.16961	0.0909223	-1.86544	0.0621203	0.139032
ENSG00000012963	1460.24	UBR7	ubiquitin protein ligase E3 component n-recognin 7 (putative) [Source:HGNC Symbol;Acc:HGNC:20344]	0.156981	0.0435298	3.60629	0.00031061	0.00221499	0.587316	0.0425003	13.8191	1.95535e-43	1.0024e-41
ENSG00000012983	592.592	MAP4K5	mitogen-activated protein kinase kinase kinase kinase 5 [Source:HGNC Symbol;Acc:HGNC:6867]	-0.145141	0.0649881	-2.23335	0.0255261	0.0827693	0.176091	0.0635984	2.7688	0.00562636	0.0173102
ENSG00000013016	291.589	EHD3	EH domain containing 3 [Source:HGNC Symbol;Acc:HGNC:3244]	0.098057	0.0805772	1.21693	0.22363	0.405938	-0.277911	0.0837989	-3.3164	0.000911842	0.00328989
ENSG00000013275	2973.47	PSMC4	proteasome 26S subunit, ATPase 4 [Source:HGNC Symbol;Acc:HGNC:9551]	-0.059749	0.0334084	-1.78845	0.073704	0.184456	-0.100073	0.0335172	-2.98573	0.00282905	0.00931168
ENSG00000013288	1045.79	MAN2B2	mannosidase alpha class 2B member 2 [Source:HGNC Symbol;Acc:HGNC:29623]	-0.0596775	0.04782	-1.24796	0.212046	0.391058	-0.541622	0.0499597	-10.8412	2.19627e-27	5.23559e-26
ENSG00000013293	0.0377402	SLC7A14	solute carrier family 7 member 14 [Source:HGNC Symbol;Acc:HGNC:29326]	0	5.94781	0	1	NA	0	5.94781	0	1	NA
ENSG00000013297	0.838319	CLDN11	claudin 11 [Source:HGNC Symbol;Acc:HGNC:8514]	-1.08702	1.53354	-0.708828	0.478432	NA	-1.79392	1.54192	-1.16343	0.244654	NA
ENSG00000013306	4272.22	SLC25A39	solute carrier family 25 member 39 [Source:HGNC Symbol;Acc:HGNC:24279]	-0.0747337	0.0327001	-2.28542	0.022288	0.0746752	-0.0856751	0.032737	-2.61707	0.0088688	0.0259695
ENSG00000013364	326.72	MVP	major vault protein [Source:HGNC Symbol;Acc:HGNC:7531]	0.0147973	0.0780244	0.18965	0.849583	0.920468	0.131882	0.0771968	1.70839	0.0875642	0.184244
ENSG00000013374	1120.25	NUB1	negative regulator of ubiquitin like proteins 1 [Source:HGNC Symbol;Acc:HGNC:17623]	0.00954314	0.0478767	0.199327	0.842007	0.916729	-0.0389296	0.0481016	-0.809321	0.418331	0.589909
ENSG00000013375	1969.45	PGM3	phosphoglucomutase 3 [Source:HGNC Symbol;Acc:HGNC:8907]	-0.0937122	0.0418649	-2.23844	0.0251921	0.0819241	0.267592	0.0411108	6.50906	7.56236e-11	6.28095e-10
ENSG00000013392	1502.15	RWDD2A	RWD domain containing 2A [Source:HGNC Symbol;Acc:HGNC:21385]	0.351193	0.0459752	7.63874	2.19352e-14	1.11489e-12	0.521185	0.0455805	11.4344	2.81504e-30	7.84385e-29
ENSG00000013441	668.62	CLK1	CDC like kinase 1 [Source:HGNC Symbol;Acc:HGNC:2068]	0.201091	0.0553304	3.63437	0.000278659	0.00201997	0.34578	0.0547808	6.31206	2.75344e-10	2.18876e-09
ENSG00000013503	792.469	POLR3B	RNA polymerase III subunit B [Source:HGNC Symbol;Acc:HGNC:30348]	-0.162712	0.0482685	-3.37099	0.000748993	0.00470632	-0.634983	0.0509584	-12.4608	1.22133e-35	4.35002e-34
ENSG00000013523	898.734	ANGEL1	angel homolog 1 [Source:HGNC Symbol;Acc:HGNC:19961]	0.0243206	0.0531513	0.457573	0.647259	0.793947	-0.00606877	0.0533385	-0.113778	0.909413	0.950611
ENSG00000013561	1562.9	RNF14	ring finger protein 14 [Source:HGNC Symbol;Acc:HGNC:10058]	0.025904	0.0402542	0.643509	0.519894	0.698998	-0.163342	0.0408638	-3.99723	6.40874e-05	0.000279263
ENSG00000013563	211.387	DNASE1L1	deoxyribonuclease 1 like 1 [Source:HGNC Symbol;Acc:HGNC:2957]	0.0351535	0.0973283	0.361185	0.717961	0.841832	-0.115588	0.098952	-1.16812	0.242757	0.403341
ENSG00000013573	660.48	DDX11	DEAD/H-box helicase 11 [Source:HGNC Symbol;Acc:HGNC:2736]	0.0157373	0.0528183	0.297951	0.765741	0.871999	-0.171524	0.0538991	-3.18231	0.00146105	0.00507295
ENSG00000013583	572.979	HEBP1	heme binding protein 1 [Source:HGNC Symbol;Acc:HGNC:17176]	0.113702	0.0721048	1.5769	0.114818	0.253919	0.196869	0.071812	2.74145	0.00611696	0.0186619
ENSG00000013588	2.71116	GPRC5A	G protein-coupled receptor class C group 5 member A [Source:HGNC Symbol;Acc:HGNC:9836]	-0.281296	0.924033	-0.304422	0.760807	NA	-0.262252	0.923787	-0.283888	0.776496	0.870693
ENSG00000013619	3.1794	MAMLD1	mastermind like domain containing 1 [Source:HGNC Symbol;Acc:HGNC:2568]	0.947813	0.923526	1.0263	0.304751	NA	1.55617	0.884542	1.7593	0.0785273	0.16907
ENSG00000013725	0.143886	CD6	CD6 molecule [Source:HGNC Symbol;Acc:HGNC:1691]	-0.496408	5.92998	-0.0837115	0.933286	NA	-0.480003	5.92998	-0.0809452	0.935486	NA
ENSG00000013810	2916.68	TACC3	transforming acidic coiled-coil containing protein 3 [Source:HGNC Symbol;Acc:HGNC:11524]	0.150021	0.0386365	3.88288	0.000103226	0.000845068	0.451635	0.0382336	11.8125	3.36389e-32	1.02672e-30
ENSG00000014123	1988.91	UFL1	UFM1 specific ligase 1 [Source:HGNC Symbol;Acc:HGNC:23039]	-0.0565183	0.0442609	-1.27694	0.201625	0.377016	-0.0305775	0.0442389	-0.691192	0.489445	0.653904
ENSG00000014138	128.551	POLA2	DNA polymerase alpha 2, accessory subunit [Source:HGNC Symbol;Acc:HGNC:30073]	0.167364	0.115824	1.44499	0.148461	0.306274	0.304592	0.114444	2.6615	0.00777936	0.0230802
ENSG00000014164	533.26	ZC3H3	zinc finger CCCH-type containing 3 [Source:HGNC Symbol;Acc:HGNC:28972]	0.285913	0.0586233	4.87711	1.0765e-06	1.46819e-05	0.199004	0.0591958	3.36179	0.000774389	0.0028268
ENSG00000014216	3092.62	CAPN1	calpain 1 [Source:HGNC Symbol;Acc:HGNC:1476]	-0.057147	0.0464948	-1.2291	0.219033	0.399798	-0.0368982	0.0464877	-0.793721	0.427358	0.59829
ENSG00000014257	3393.13	ACPP	acid phosphatase, prostate [Source:HGNC Symbol;Acc:HGNC:125]	-0.0789031	0.0520221	-1.51672	0.129337	0.277278	-0.442023	0.0526381	-8.3974	4.5649e-17	6.1884e-16
ENSG00000014641	1915.34	MDH1	malate dehydrogenase 1 [Source:HGNC Symbol;Acc:HGNC:6970]	-0.0281442	0.0358141	-0.78584	0.431961	0.623548	0.158342	0.0353561	4.4785	7.51705e-06	3.70433e-05
ENSG00000014824	3689.78	SLC30A9	solute carrier family 30 member 9 [Source:HGNC Symbol;Acc:HGNC:1329]	-0.0319798	0.0365841	-0.874143	0.38204	0.577602	0.28753	0.0361782	7.94761	1.90147e-15	2.31342e-14
ENSG00000014914	33.7882	MTMR11	myotubularin related protein 11 [Source:HGNC Symbol;Acc:HGNC:24307]	0.189948	0.234093	0.811424	0.417122	0.610534	-0.269036	0.248041	-1.08464	0.278081	0.445018
ENSG00000014919	543.463	COX15	cytochrome c oxidase assembly homolog COX15 [Source:HGNC Symbol;Acc:HGNC:2263]	0.0132748	0.0581602	0.228245	0.819456	0.90464	0.0485041	0.0580548	0.835489	0.403442	0.574909
ENSG00000015133	802.447	CCDC88C	coiled-coil domain containing 88C [Source:HGNC Symbol;Acc:HGNC:19967]	0.0136167	0.0592833	0.229688	0.818334	0.904192	-0.0949011	0.0597492	-1.58832	0.112213	0.225247
ENSG00000015153	263.722	YAF2	YY1 associated factor 2 [Source:HGNC Symbol;Acc:HGNC:17363]	0.248094	0.0837746	2.96145	0.00306195	0.0150738	0.21321	0.0841727	2.533	0.011309	0.0321549
ENSG00000015171	2398.34	ZMYND11	zinc finger MYND-type containing 11 [Source:HGNC Symbol;Acc:HGNC:16966]	-0.052694	0.0382219	-1.37863	0.168008	0.332861	-0.0173631	0.0381806	-0.454763	0.64928	0.783617
ENSG00000015285	12.9981	WAS	WASP actin nucleation promoting factor [Source:HGNC Symbol;Acc:HGNC:12731]	-0.502735	0.397567	-1.26453	0.20604	NA	0.673231	0.353825	1.90272	0.0570767	0.129522
ENSG00000015413	0.390063	DPEP1	dipeptidase 1 [Source:HGNC Symbol;Acc:HGNC:3002]	0.296441	4.60192	0.0644168	0.948638	NA	-1.18774	4.60673	-0.257828	0.79654	NA
ENSG00000015475	197.497	BID	BH3 interacting domain death agonist [Source:HGNC Symbol;Acc:HGNC:1050]	-0.176912	0.0963114	-1.83688	0.0662283	0.169881	-0.663185	0.102476	-6.47163	9.69522e-11	7.97091e-10
ENSG00000015479	26.9013	MATR3	matrin 3 [Source:HGNC Symbol;Acc:HGNC:6912]	0.257245	0.273936	0.939069	0.347695	0.542756	0.46628	0.269491	1.73023	0.0835899	0.177723
ENSG00000015520	1.9934	NPC1L1	NPC1 like intracellular cholesterol transporter 1 [Source:HGNC Symbol;Acc:HGNC:7898]	-0.268326	0.831709	-0.32262	0.746983	NA	-1.56471	1.00131	-1.56266	0.118132	0.234543
ENSG00000015532	451.773	XYLT2	xylosyltransferase 2 [Source:HGNC Symbol;Acc:HGNC:15517]	0.104056	0.0657431	1.58277	0.113473	0.25241	-0.0909148	0.0671134	-1.35464	0.175531	0.319107
ENSG00000015568	23.6049	RGPD5	RANBP2 like and GRIP domain containing 5 [Source:HGNC Symbol;Acc:HGNC:32418]	0.17592	0.444028	0.396191	0.691964	NA	0.677225	0.437584	1.54765	0.121708	0.240332
ENSG00000015592	1.72516	STMN4	stathmin 4 [Source:HGNC Symbol;Acc:HGNC:16078]	0.228123	1.077	0.211813	0.832253	NA	-0.335102	1.15431	-0.290304	0.771584	0.867441
ENSG00000015676	1804.88	NUDCD3	NudC domain containing 3 [Source:HGNC Symbol;Acc:HGNC:22208]	-0.0801047	0.0373165	-2.14663	0.0318228	0.0977861	-0.160662	0.0375915	-4.27389	1.92092e-05	8.98997e-05
ENSG00000016082	1.14004	ISL1	ISL LIM homeobox 1 [Source:HGNC Symbol;Acc:HGNC:6132]	0.838621	1.35173	0.620406	0.53499	NA	-0.0290832	1.4207	-0.0204711	0.983668	NA
ENSG00000016391	1088.04	CHDH	choline dehydrogenase [Source:HGNC Symbol;Acc:HGNC:24288]	0.230296	0.0541903	4.24976	2.14003e-05	0.000212293	-0.617783	0.0572968	-10.7822	4.17927e-27	9.84062e-26
ENSG00000016402	5.20266	IL20RA	interleukin 20 receptor subunit alpha [Source:HGNC Symbol;Acc:HGNC:6003]	0.223617	0.593133	0.37701	0.706166	NA	-0.885971	0.674197	-1.31411	0.188808	0.336752
ENSG00000016490	0	CLCA1	chloride channel accessory 1 [Source:HGNC Symbol;Acc:HGNC:2015]	NA	NA	NA	NA	NA	NA	NA	NA	NA	NA
ENSG00000016602	0	CLCA4	chloride channel accessory 4 [Source:HGNC Symbol;Acc:HGNC:2018]	NA	NA	NA	NA	NA	NA	NA	NA	NA	NA
ENSG00000016864	903.539	GLT8D1	glycosyltransferase 8 domain containing 1 [Source:HGNC Symbol;Acc:HGNC:24870]	0.125361	0.0467883	2.67933	0.00737698	0.0309763	-0.0423319	0.0475862	-0.889584	0.373689	0.547002
ENSG00000017260	2317.93	ATP2C1	ATPase secretory pathway Ca2+ transporting 1 [Source:HGNC Symbol;Acc:HGNC:13211]	-0.0844688	0.0390238	-2.16455	0.0304225	0.0943642	0.233935	0.0384078	6.09082	1.12334e-09	8.44645e-09
ENSG00000017427	20.7401	IGF1	insulin like growth factor 1 [Source:HGNC Symbol;Acc:HGNC:5464]	-0.000160719	0.304012	-0.000528662	0.999578	NA	-0.163654	0.308028	-0.531296	0.595214	0.743507
ENSG00000017483	1.8372	SLC38A5	solute carrier family 38 member 5 [Source:HGNC Symbol;Acc:HGNC:18070]	-1.06139	0.978454	-1.08476	0.278029	NA	-2.47694	1.1802	-2.09875	0.0358391	0.0876615
ENSG00000017797	1899.56	RALBP1	ralA binding protein 1 [Source:HGNC Symbol;Acc:HGNC:9841]	0.0817855	0.0374481	2.18397	0.0289645	0.0910994	0.112511	0.0374112	3.00743	0.0026347	0.00872493
ENSG00000018189	423.806	RUFY3	RUN and FYVE domain containing 3 [Source:HGNC Symbol;Acc:HGNC:30285]	0.0478635	0.0775105	0.61751	0.536899	0.712413	0.284441	0.0762731	3.72925	0.000192053	0.000773229
ENSG00000018236	0.0367833	CNTN1	contactin 1 [Source:HGNC Symbol;Acc:HGNC:2171]	0	5.94781	0	1	NA	0	5.94781	0	1	NA
ENSG00000018280	46.7399	SLC11A1	solute carrier family 11 member 1 [Source:HGNC Symbol;Acc:HGNC:10907]	-0.0623937	0.243563	-0.256171	0.797819	0.891628	-0.0400104	0.243445	-0.164351	0.869455	0.927041
ENSG00000018408	69.2766	WWTR1	WW domain containing transcription regulator 1 [Source:HGNC Symbol;Acc:HGNC:24042]	0.10639	0.166826	0.637731	0.523649	0.701273	1.16808	0.15691	7.44429	9.74651e-14	1.03915e-12
ENSG00000018510	662.461	AGPS	alkylglycerone phosphate synthase [Source:HGNC Symbol;Acc:HGNC:327]	-0.0971284	0.0549928	-1.7662	0.0773618	0.191139	-0.0300087	0.0547273	-0.548331	0.583465	0.734408
ENSG00000018607	0	ZNF806	zinc finger protein 806 [Source:HGNC Symbol;Acc:HGNC:33228]	NA	NA	NA	NA	NA	NA	NA	NA	NA	NA
ENSG00000018610	667.374	CXorf56	chromosome X open reading frame 56 [Source:HGNC Symbol;Acc:HGNC:26239]	0.153321	0.0539905	2.83978	0.0045144	0.0207644	0.491125	0.0524944	9.35577	8.29967e-21	1.42983e-19
ENSG00000018625	1.90042	ATP1A2	ATPase Na+/K+ transporting subunit alpha 2 [Source:HGNC Symbol;Acc:HGNC:800]	1.41408	1.09138	1.29568	0.195087	NA	-0.165171	1.28621	-0.128417	0.897819	0.944223
ENSG00000018699	735.203	TTC27	tetratricopeptide repeat domain 27 [Source:HGNC Symbol;Acc:HGNC:25986]	0.229398	0.0492536	4.65749	3.20084e-06	3.90509e-05	0.215612	0.0493926	4.36527	1.26968e-05	6.092e-05
ENSG00000018869	80.0171	ZNF582	zinc finger protein 582 [Source:HGNC Symbol;Acc:HGNC:26421]	-0.0258603	0.151362	-0.170851	0.864341	0.929459	-0.0453579	0.151894	-0.298614	0.765234	0.862875
ENSG00000019102	3.43591	VSIG2	V-set and immunoglobulin domain containing 2 [Source:HGNC Symbol;Acc:HGNC:17149]	0.514745	0.817178	0.629906	0.528756	NA	1.32599	0.766417	1.73011	0.0836102	0.177748
ENSG00000019144	243.156	PHLDB1	pleckstrin homology like domain family B member 1 [Source:HGNC Symbol;Acc:HGNC:23697]	0.21615	0.0922676	2.34265	0.0191475	0.0660875	0.172874	0.0927853	1.86317	0.0624388	0.139641
ENSG00000019169	0.0337677	MARCO	macrophage receptor with collagenous structure [Source:HGNC Symbol;Acc:HGNC:6895]	0.946195	5.94781	0.159083	0.873603	NA	0	5.94781	0	1	NA
ENSG00000019186	0.0287323	CYP24A1	cytochrome P450 family 24 subfamily A member 1 [Source:HGNC Symbol;Acc:HGNC:2602]	0	5.94781	0	1	NA	0	5.94781	0	1	NA
ENSG00000019485	52.1073	PRDM11	PR/SET domain 11 [Source:HGNC Symbol;Acc:HGNC:13996]	-0.103594	0.20052	-0.51663	0.605415	0.763818	-0.505111	0.208517	-2.42239	0.0154187	0.0421118
ENSG00000019505	1.20478	SYT13	synaptotagmin 13 [Source:HGNC Symbol;Acc:HGNC:14962]	-0.237698	1.26907	-0.187301	0.851425	NA	-2.2883	1.49723	-1.52835	0.126425	NA
ENSG00000019549	18.2422	SNAI2	snail family transcriptional repressor 2 [Source:HGNC Symbol;Acc:HGNC:11094]	0.167339	0.311001	0.538066	0.590532	NA	0.801626	0.299608	2.67558	0.00745996	0.0222325
ENSG00000019582	1.70637	CD74	CD74 molecule [Source:HGNC Symbol;Acc:HGNC:1697]	0.906911	1.1045	0.821104	0.411587	NA	1.38341	1.07181	1.29072	0.1968	0.347079
ENSG00000019991	0.0284688	HGF	hepatocyte growth factor [Source:HGNC Symbol;Acc:HGNC:4893]	-0.496359	5.94781	-0.0834525	0.933492	NA	-0.479955	5.94781	-0.0806945	0.935685	NA
ENSG00000019995	279.573	ZRANB1	zinc finger RANBP2-type containing 1 [Source:HGNC Symbol;Acc:HGNC:18224]	0.157579	0.0810719	1.9437	0.0519322	0.141798	0.512427	0.0785462	6.5239	6.85022e-11	5.70519e-10
ENSG00000020129	2078.89	NCDN	neurochondrin [Source:HGNC Symbol;Acc:HGNC:17597]	0.0667072	0.0423959	1.57344	0.115618	0.255282	-0.296228	0.0432769	-6.84496	7.64981e-12	6.95829e-11
ENSG00000020181	4.29515	ADGRA2	adhesion G protein-coupled receptor A2 [Source:HGNC Symbol;Acc:HGNC:17849]	0.220381	0.70869	0.310969	0.755824	NA	-0.0167686	0.724302	-0.0231513	0.98153	0.989431
ENSG00000020219	0.265566	CCT8L1P	chaperonin containing TCP1 subunit 8 like 1, pseudogene [Source:HGNC Symbol;Acc:HGNC:32153]	-0.773645	5.90266	-0.131067	0.895722	NA	-2.1874	5.90438	-0.370471	0.711032	NA
ENSG00000020256	449.195	ZFP64	ZFP64 zinc finger protein [Source:HGNC Symbol;Acc:HGNC:15940]	-0.0529888	0.0668488	-0.792666	0.427972	0.619715	-0.241766	0.0681964	-3.54514	0.000392407	0.00150418
ENSG00000020426	404.661	MNAT1	MNAT1 component of CDK activating kinase [Source:HGNC Symbol;Acc:HGNC:7181]	0.0906199	0.0665118	1.36246	0.173051	0.339542	0.437527	0.0643465	6.79955	1.04945e-11	9.44815e-11
ENSG00000020577	23.033	SAMD4A	sterile alpha motif domain containing 4A [Source:HGNC Symbol;Acc:HGNC:23023]	0.434775	0.335515	1.29584	0.195029	NA	0.0152621	0.345858	0.0441282	0.964802	0.980331
ENSG00000020633	0.199726	RUNX3	RUNX family transcription factor 3 [Source:HGNC Symbol;Acc:HGNC:10473]	-1.75065	4.70793	-0.371851	0.710004	NA	-1.73424	4.70793	-0.368366	0.7126	NA
ENSG00000020922	885.731	MRE11	MRE11 homolog, double strand break repair nuclease [Source:HGNC Symbol;Acc:HGNC:7230]	0.0362505	0.0526798	0.688128	0.491372	0.6756	0.197824	0.052138	3.79425	0.000148093	0.000608418
ENSG00000021300	2554.65	PLEKHB1	pleckstrin homology domain containing B1 [Source:HGNC Symbol;Acc:HGNC:19079]	-0.0833564	0.0380255	-2.19212	0.0283708	0.0897125	-0.117232	0.0381311	-3.07444	0.00210896	0.00711771
ENSG00000021355	0.230676	SERPINB1	serpin family B member 1 [Source:HGNC Symbol;Acc:HGNC:3311]	0	3.6489	0	1	NA	0	3.6489	0	1	NA
ENSG00000021461	5.45617	CYP3A43	cytochrome P450 family 3 subfamily A member 43 [Source:HGNC Symbol;Acc:HGNC:17450]	0.168906	0.579358	0.29154	0.770639	NA	0.124854	0.582706	0.214265	0.83034	0.902
ENSG00000021488	1.62036	SLC7A9	solute carrier family 7 member 9 [Source:HGNC Symbol;Acc:HGNC:11067]	0.38934	1.03774	0.375182	0.707525	NA	0.0918942	1.062	0.0865291	0.931046	0.962254
ENSG00000021574	820.123	SPAST	spastin [Source:HGNC Symbol;Acc:HGNC:11233]	0.210867	0.0536171	3.93282	8.39545e-05	0.000703934	0.259992	0.0534893	4.86063	1.17014e-06	6.3928e-06
ENSG00000021645	1.62531	NRXN3	neurexin 3 [Source:HGNC Symbol;Acc:HGNC:8010]	-0.622039	0.97037	-0.641033	0.521501	NA	0.498919	0.870173	0.573356	0.566404	0.71945
ENSG00000021762	1432.28	OSBPL5	oxysterol binding protein like 5 [Source:HGNC Symbol;Acc:HGNC:16392]	0.0514604	0.0461202	1.11579	0.264512	0.453179	-0.748755	0.0487707	-15.3525	3.40563e-53	2.66409e-51
ENSG00000021776	1583.92	AQR	aquarius intron-binding spliceosomal factor [Source:HGNC Symbol;Acc:HGNC:29513]	-0.000707098	0.0501773	-0.014092	0.988757	0.993967	-0.0166053	0.0502492	-0.330459	0.741053	0.846448
ENSG00000021826	385.012	CPS1	carbamoyl-phosphate synthase 1 [Source:HGNC Symbol;Acc:HGNC:2323]	-0.135381	0.0690765	-1.95987	0.0500107	0.138162	-0.579816	0.072882	-7.95555	1.78333e-15	2.17093e-14
ENSG00000021852	0.0313497	C8B	complement C8 beta chain [Source:HGNC Symbol;Acc:HGNC:1353]	0	5.94781	0	1	NA	0	5.94781	0	1	NA
ENSG00000022267	0.765121	FHL1	four and a half LIM domains 1 [Source:HGNC Symbol;Acc:HGNC:3702]	-0.0959894	1.67707	-0.0572364	0.954357	NA	-1.04063	1.82043	-0.57164	0.567566	NA
ENSG00000022277	1229.19	RTF2	replication termination factor 2 [Source:HGNC Symbol;Acc:HGNC:15890]	-0.0554986	0.0400623	-1.38531	0.165958	0.329915	-0.0860659	0.0402465	-2.13847	0.0324784	0.0806463
ENSG00000022355	0	GABRA1	gamma-aminobutyric acid type A receptor alpha1 subunit [Source:HGNC Symbol;Acc:HGNC:4075]	NA	NA	NA	NA	NA	NA	NA	NA	NA	NA
ENSG00000022556	1142.96	NLRP2	NLR family pyrin domain containing 2 [Source:HGNC Symbol;Acc:HGNC:22948]	-0.189873	0.0469301	-4.04586	5.21307e-05	0.000462584	-0.390499	0.0477737	-8.17393	2.98505e-16	3.81181e-15
ENSG00000022567	348.198	SLC45A4	solute carrier family 45 member 4 [Source:HGNC Symbol;Acc:HGNC:29196]	0.0594407	0.0777916	0.764102	0.444806	0.635355	-0.299995	0.0804908	-3.72707	0.000193722	0.000779353
ENSG00000022840	4516.35	RNF10	ring finger protein 10 [Source:HGNC Symbol;Acc:HGNC:10055]	-0.0870688	0.0225757	-3.85675	0.000114905	0.000931984	-0.307345	0.0230647	-13.3253	1.64872e-40	7.34654e-39
ENSG00000022976	203.556	ZNF839	zinc finger protein 839 [Source:HGNC Symbol;Acc:HGNC:20345]	-0.106705	0.0951902	-1.12096	0.262303	0.451034	-0.510696	0.0996341	-5.12572	2.9641e-07	1.74679e-06
ENSG00000023041	726.011	ZDHHC6	zinc finger DHHC-type containing 6 [Source:HGNC Symbol;Acc:HGNC:19160]	-0.034974	0.0560193	-0.624321	0.532417	0.708669	-0.339165	0.0575382	-5.89461	3.75558e-09	2.69252e-08
ENSG00000023171	4.81848	GRAMD1B	GRAM domain containing 1B [Source:HGNC Symbol;Acc:HGNC:29214]	-0.27415	0.585486	-0.468243	0.639611	NA	-1.59212	0.694506	-2.29244	0.0218801	0.0571305
ENSG00000023191	2608.89	RNH1	ribonuclease/angiogenin inhibitor 1 [Source:HGNC Symbol;Acc:HGNC:10074]	-0.0545659	0.041112	-1.32725	0.184426	0.354887	0.146772	0.0407878	3.59843	0.000320149	0.00124597
ENSG00000023228	3713.1	NDUFS1	NADH:ubiquinone oxidoreductase core subunit S1 [Source:HGNC Symbol;Acc:HGNC:7707]	-0.0649924	0.0313279	-2.07458	0.0380251	0.111583	0.0772959	0.0311213	2.48369	0.0130027	0.0362884
ENSG00000023287	1796.34	RB1CC1	RB1 inducible coiled-coil 1 [Source:HGNC Symbol;Acc:HGNC:15574]	-0.212614	0.0631584	-3.36636	0.000761659	0.00477679	0.272922	0.062274	4.38259	1.17275e-05	5.65128e-05
ENSG00000023318	1559.34	ERP44	endoplasmic reticulum protein 44 [Source:HGNC Symbol;Acc:HGNC:18311]	-0.148092	0.0455125	-3.25388	0.00113841	0.00663684	0.064749	0.0450121	1.43848	0.150298	0.28313
ENSG00000023330	2055.93	ALAS1	5'-aminolevulinate synthase 1 [Source:HGNC Symbol;Acc:HGNC:396]	-0.384286	0.0366448	-10.4868	9.93382e-26	1.39116e-23	-0.576315	0.0372816	-15.4584	6.61772e-54	5.27445e-52
ENSG00000023445	162.032	BIRC3	baculoviral IAP repeat containing 3 [Source:HGNC Symbol;Acc:HGNC:591]	0.0977896	0.1204	0.812207	0.416673	0.610063	0.120395	0.120335	1.0005	0.317068	0.489181
ENSG00000023516	1460.69	AKAP11	A-kinase anchoring protein 11 [Source:HGNC Symbol;Acc:HGNC:369]	0.028758	0.0471275	0.610216	0.541719	0.716774	0.114387	0.0469465	2.43653	0.0148289	0.0406915
ENSG00000023572	935.952	GLRX2	glutaredoxin 2 [Source:HGNC Symbol;Acc:HGNC:16065]	0.161838	0.0577902	2.80044	0.00510337	0.0229854	0.333108	0.0573689	5.80643	6.38203e-09	4.46637e-08
ENSG00000023608	174.173	SNAPC1	small nuclear RNA activating complex polypeptide 1 [Source:HGNC Symbol;Acc:HGNC:11134]	0.188852	0.102043	1.85071	0.0642109	0.165902	0.495608	0.0995499	4.97848	6.40844e-07	3.61809e-06
ENSG00000023697	560.631	DERA	deoxyribose-phosphate aldolase [Source:HGNC Symbol;Acc:HGNC:24269]	0.0196382	0.0618881	0.317317	0.751003	0.862896	0.33734	0.0603513	5.58962	2.27571e-08	1.51149e-07
ENSG00000023734	5218.25	STRAP	serine/threonine kinase receptor associated protein [Source:HGNC Symbol;Acc:HGNC:30796]	-0.0200312	0.0275292	-0.727637	0.466836	0.656029	0.129895	0.0273569	4.74817	2.05266e-06	1.08657e-05
ENSG00000023839	2.93146	ABCC2	ATP binding cassette subfamily C member 2 [Source:HGNC Symbol;Acc:HGNC:53]	-0.149726	0.862846	-0.173526	0.862238	NA	0.882861	0.769911	1.1467	0.251504	0.413579
ENSG00000023892	467.376	DEF6	DEF6 guanine nucleotide exchange factor [Source:HGNC Symbol;Acc:HGNC:2760]	0.0741425	0.06687	1.10876	0.267535	0.456479	0.180978	0.0663688	2.72686	0.006394	0.0194146
ENSG00000023902	38.5057	PLEKHO1	pleckstrin homology domain containing O1 [Source:HGNC Symbol;Acc:HGNC:24310]	0.254436	0.219517	1.15907	0.246426	0.432239	0.228873	0.220345	1.0387	0.298944	0.468305
ENSG00000023909	1717.96	GCLM	glutamate-cysteine ligase modifier subunit [Source:HGNC Symbol;Acc:HGNC:4312]	-0.0690959	0.0368231	-1.87643	0.0605962	0.158481	-0.114494	0.0369975	-3.09465	0.00197045	0.0066861
ENSG00000024048	1140.99	UBR2	ubiquitin protein ligase E3 component n-recognin 2 [Source:HGNC Symbol;Acc:HGNC:21289]	0.0289334	0.0557643	0.518851	0.603864	0.762374	-0.221472	0.0566037	-3.91268	9.1279e-05	0.000387207
ENSG00000024422	0.255957	EHD2	EH domain containing 2 [Source:HGNC Symbol;Acc:HGNC:3243]	1.95447	3.48166	0.561361	0.574551	NA	0.958676	3.55545	0.269636	0.787441	NA
ENSG00000024526	843.377	DEPDC1	DEP domain containing 1 [Source:HGNC Symbol;Acc:HGNC:22949]	0.0433475	0.067596	0.641273	0.521345	0.699805	0.229598	0.0671623	3.41856	0.000629536	0.00233066
ENSG00000024862	194.238	CCDC28A	coiled-coil domain containing 28A [Source:HGNC Symbol;Acc:HGNC:21098]	-0.0878954	0.0968086	-0.90793	0.363915	0.559321	-0.330014	0.09954	-3.31539	0.000915139	0.00329953
ENSG00000025039	499.373	RRAGD	Ras related GTP binding D [Source:HGNC Symbol;Acc:HGNC:19903]	-0.0315977	0.0616995	-0.512122	0.608566	0.766178	0.272644	0.0599038	4.55136	5.32999e-06	2.68077e-05
ENSG00000025156	486.115	HSF2	heat shock transcription factor 2 [Source:HGNC Symbol;Acc:HGNC:5225]	0.461072	0.0660696	6.97857	2.98198e-12	1.14113e-10	0.833654	0.0643747	12.95	2.3489e-38	9.46777e-37
ENSG00000025293	2049.23	PHF20	PHD finger protein 20 [Source:HGNC Symbol;Acc:HGNC:16098]	0.00348111	0.0454151	0.076651	0.938901	0.970682	0.0556156	0.0453395	1.22665	0.219955	0.376477
ENSG00000025423	23.7026	HSD17B6	hydroxysteroid 17-beta dehydrogenase 6 [Source:HGNC Symbol;Acc:HGNC:23316]	-0.228396	0.273055	-0.836446	0.402904	NA	0.0257764	0.266606	0.0966834	0.922978	0.957082
ENSG00000025434	248.629	NR1H3	nuclear receptor subfamily 1 group H member 3 [Source:HGNC Symbol;Acc:HGNC:7966]	-0.11078	0.0808788	-1.3697	0.17078	0.336499	-0.49393	0.0850562	-5.8071	6.35648e-09	4.44996e-08
ENSG00000025708	110.668	TYMP	thymidine phosphorylase [Source:HGNC Symbol;Acc:HGNC:3148]	-0.206769	0.142793	-1.44803	0.147608	0.305137	-0.253389	0.143637	-1.7641	0.0777156	0.167578
ENSG00000025770	706.793	NCAPH2	non-SMC condensin II complex subunit H2 [Source:HGNC Symbol;Acc:HGNC:25071]	0.0457975	0.0680309	0.673187	0.500828	0.683562	0.444354	0.0666953	6.66245	2.69293e-11	2.32913e-10
ENSG00000025772	1559.54	TOMM34	translocase of outer mitochondrial membrane 34 [Source:HGNC Symbol;Acc:HGNC:15746]	-0.00512023	0.0402675	-0.127156	0.898817	0.950365	0.347295	0.0392982	8.83744	9.79369e-19	1.47963e-17
ENSG00000025796	4123.67	SEC63	SEC63 homolog, protein translocation regulator [Source:HGNC Symbol;Acc:HGNC:21082]	-0.174413	0.0345804	-5.04369	4.56643e-07	6.66435e-06	-0.250754	0.0347059	-7.22509	5.00775e-13	5.0342e-12
ENSG00000025800	2058.4	KPNA6	karyopherin subunit alpha 6 [Source:HGNC Symbol;Acc:HGNC:6399]	0.0607088	0.0460441	1.31849	0.187339	0.358535	0.0324642	0.0461301	0.703754	0.481586	0.647376
ENSG00000026025	13.8937	VIM	vimentin [Source:HGNC Symbol;Acc:HGNC:12692]	-0.239287	0.357319	-0.669672	0.503067	NA	-0.445355	0.365883	-1.21721	0.223525	0.38064
ENSG00000026036	44.3057	RTEL1-TNFRSF6B	RTEL1-TNFRSF6B readthrough (NMD candidate) [Source:HGNC Symbol;Acc:HGNC:44095]	-0.103988	0.224594	-0.463005	0.643361	0.791145	0.488071	0.213348	2.28767	0.0221566	0.0577953
ENSG00000026103	222.06	FAS	Fas cell surface death receptor [Source:HGNC Symbol;Acc:HGNC:11920]	0.28173	0.101578	2.77353	0.0055451	0.0246274	1.39467	0.0938405	14.8621	5.80611e-50	3.99449e-48
ENSG00000026297	514.099	RNASET2	ribonuclease T2 [Source:HGNC Symbol;Acc:HGNC:21686]	0.0506939	0.0850215	0.596248	0.55101	0.724141	-0.012383	0.0853513	-0.145083	0.884645	0.936471
ENSG00000026508	2.6794	CD44	CD44 molecule (Indian blood group) [Source:HGNC Symbol;Acc:HGNC:1681]	-0.0770726	0.76424	-0.100849	0.919671	NA	0.0542275	0.756694	0.0716637	0.94287	0.969103
ENSG00000026559	109.281	KCNG1	potassium voltage-gated channel modifier subfamily G member 1 [Source:HGNC Symbol;Acc:HGNC:6248]	-0.374654	0.136569	-2.74332	0.00608205	0.0265376	-0.559652	0.140543	-3.98207	6.83182e-05	0.000296186
ENSG00000026652	2.37693	AGPAT4	1-acylglycerol-3-phosphate O-acyltransferase 4 [Source:HGNC Symbol;Acc:HGNC:20885]	0.0755732	1.06169	0.0711821	0.943253	NA	0.587854	1.02083	0.575862	0.564709	0.717815
ENSG00000026751	0.35162	SLAMF7	SLAM family member 7 [Source:HGNC Symbol;Acc:HGNC:21394]	0.946249	2.78565	0.339687	0.734092	NA	0.962654	2.78565	0.345576	0.729662	NA
ENSG00000026950	132.254	BTN3A1	butyrophilin subfamily 3 member A1 [Source:HGNC Symbol;Acc:HGNC:1138]	-0.53179	0.117733	-4.51691	6.27498e-06	7.12102e-05	-1.04823	0.126289	-8.30023	1.03908e-16	1.37681e-15
ENSG00000027001	344.953	MIPEP	mitochondrial intermediate peptidase [Source:HGNC Symbol;Acc:HGNC:7104]	-0.0929108	0.0777743	-1.19462	0.232235	0.416391	-0.341768	0.0797005	-4.28816	1.8016e-05	8.4653e-05
ENSG00000027075	423.084	PRKCH	protein kinase C eta [Source:HGNC Symbol;Acc:HGNC:9403]	0.178723	0.071431	2.50204	0.0123479	0.0468168	0.181784	0.0715059	2.54222	0.0110151	0.0313852
ENSG00000027644	0.299964	INSRR	insulin receptor related receptor [Source:HGNC Symbol;Acc:HGNC:6093]	0	3.12814	0	1	NA	0.962646	3.12814	0.307738	0.758282	NA
ENSG00000027697	636.034	IFNGR1	interferon gamma receptor 1 [Source:HGNC Symbol;Acc:HGNC:5439]	-0.104852	0.0733695	-1.42909	0.152978	0.31246	-0.0801542	0.0733331	-1.09302	0.274387	0.440709
ENSG00000027847	557.091	B4GALT7	beta-1,4-galactosyltransferase 7 [Source:HGNC Symbol;Acc:HGNC:930]	-0.00354024	0.0625534	-0.0565954	0.954867	0.978581	-0.407579	0.0649326	-6.27695	3.45271e-10	2.71904e-09
ENSG00000027869	1.70031	SH2D2A	SH2 domain containing 2A [Source:HGNC Symbol;Acc:HGNC:10821]	1.09818	1.14485	0.959237	0.33744	NA	-2.06846	1.4705	-1.40663	0.159536	0.296645
ENSG00000028116	287.418	VRK2	VRK serine/threonine kinase 2 [Source:HGNC Symbol;Acc:HGNC:12719]	0.124146	0.0796117	1.5594	0.118902	0.26054	0.139716	0.0796192	1.75481	0.0792923	0.170352
ENSG00000028137	1.81013	TNFRSF1B	TNF receptor superfamily member 1B [Source:HGNC Symbol;Acc:HGNC:11917]	-1.4633	1.09866	-1.3319	0.182894	NA	-1.45595	1.09986	-1.32375	0.185585	0.33235
ENSG00000028203	2019.65	VEZT	vezatin, adherens junctions transmembrane protein [Source:HGNC Symbol;Acc:HGNC:18258]	-0.114226	0.0392744	-2.9084	0.00363284	0.0173271	-0.0371507	0.0391283	-0.949458	0.342388	0.514955
ENSG00000028277	5.49012	POU2F2	POU class 2 homeobox 2 [Source:HGNC Symbol;Acc:HGNC:9213]	-0.898955	0.605536	-1.48456	0.13766	NA	-0.89446	0.606589	-1.47457	0.140328	0.268709
ENSG00000028310	673.568	BRD9	bromodomain containing 9 [Source:HGNC Symbol;Acc:HGNC:25818]	-0.0756557	0.05267	-1.43641	0.150886	0.309576	-0.181483	0.0533487	-3.40183	0.000669374	0.00246648
ENSG00000028528	2735.08	SNX1	sorting nexin 1 [Source:HGNC Symbol;Acc:HGNC:11172]	-0.0211159	0.0297775	-0.709123	0.478248	0.665503	0.190033	0.0293243	6.48038	9.14915e-11	7.53957e-10
ENSG00000028839	523.786	TBPL1	TATA-box binding protein like 1 [Source:HGNC Symbol;Acc:HGNC:11589]	0.0903997	0.0677073	1.33516	0.181826	0.351282	0.598942	0.0654698	9.14837	5.77992e-20	9.53732e-19
ENSG00000029153	105.906	ARNTL2	aryl hydrocarbon receptor nuclear translocator like 2 [Source:HGNC Symbol;Acc:HGNC:18984]	0.0182855	0.152082	0.120235	0.904297	0.953936	0.644353	0.145913	4.41601	1.00538e-05	4.87705e-05
ENSG00000029363	6111.1	BCLAF1	BCL2 associated transcription factor 1 [Source:HGNC Symbol;Acc:HGNC:16863]	0.0180738	0.0398771	0.453238	0.650377	0.795841	0.52458	0.0395205	13.2736	3.292e-40	1.44554e-38
ENSG00000029364	3730.6	SLC39A9	solute carrier family 39 member 9 [Source:HGNC Symbol;Acc:HGNC:20182]	0.0423842	0.034252	1.23742	0.21593	0.396067	0.212965	0.0340354	6.25717	3.92019e-10	3.06547e-09
ENSG00000029534	88.4461	ANK1	ankyrin 1 [Source:HGNC Symbol;Acc:HGNC:492]	-0.0589029	0.133588	-0.44093	0.659264	0.802794	-0.412614	0.138972	-2.96904	0.00298737	0.00977687
ENSG00000029559	0.125511	IBSP	integrin binding sialoprotein [Source:HGNC Symbol;Acc:HGNC:5341]	0	5.43144	0	1	NA	0.962585	5.43144	0.177225	0.859332	NA
ENSG00000029639	148.034	TFB1M	transcription factor B1, mitochondrial [Source:HGNC Symbol;Acc:HGNC:17037]	0.00579363	0.112511	0.0514939	0.958932	0.980737	-0.333477	0.116861	-2.85362	0.00432236	0.0136584
ENSG00000029725	2041.14	RABEP1	rabaptin, RAB GTPase binding effector protein 1 [Source:HGNC Symbol;Acc:HGNC:17677]	0.115311	0.0339557	3.39591	0.000684001	0.00436249	0.603664	0.0327902	18.4099	1.09404e-75	1.72442e-73
ENSG00000029993	1495.16	HMGB3	high mobility group box 3 [Source:HGNC Symbol;Acc:HGNC:5004]	0.0707292	0.0386949	1.82787	0.0675695	0.172311	0.153743	0.0384979	3.99353	6.50957e-05	0.000283248
ENSG00000030066	1678.43	NUP160	nucleoporin 160 [Source:HGNC Symbol;Acc:HGNC:18017]	0.325758	0.0405948	8.02463	1.01836e-15	5.9581e-14	0.646961	0.0399219	16.2057	4.59672e-59	4.41306e-57
ENSG00000030110	517.579	BAK1	BCL2 antagonist/killer 1 [Source:HGNC Symbol;Acc:HGNC:949]	0.0879817	0.0561103	1.56801	0.116878	0.257288	-0.440501	0.0597574	-7.37149	1.68735e-13	1.76603e-12
ENSG00000030304	0.123036	MUSK	muscle associated receptor tyrosine kinase [Source:HGNC Symbol;Acc:HGNC:7525]	0.946178	5.46714	0.173066	0.862599	NA	0	5.46714	0	1	NA
ENSG00000030419	97.3703	IKZF2	IKAROS family zinc finger 2 [Source:HGNC Symbol;Acc:HGNC:13177]	-0.054552	0.147009	-0.37108	0.710578	0.836303	0.37286	0.141946	2.62677	0.00861988	0.0253038
ENSG00000030582	1511.34	GRN	granulin precursor [Source:HGNC Symbol;Acc:HGNC:4601]	-0.0812949	0.0506765	-1.60419	0.108671	0.2443	-0.0213872	0.0505562	-0.423038	0.672268	0.798188
ENSG00000031003	1193.94	FAM13B	family with sequence similarity 13 member B [Source:HGNC Symbol;Acc:HGNC:1335]	0.182561	0.0441135	4.13843	3.49693e-05	0.000327408	0.617924	0.0427517	14.4538	2.37217e-47	1.45225e-45
ENSG00000031081	20.1139	ARHGAP31	Rho GTPase activating protein 31 [Source:HGNC Symbol;Acc:HGNC:29216]	0.0925768	0.310583	0.298074	0.765647	NA	-0.304295	0.324427	-0.937944	0.348273	0.520696
ENSG00000031691	375.056	CENPQ	centromere protein Q [Source:HGNC Symbol;Acc:HGNC:21347]	0.218505	0.0754398	2.89641	0.00377458	0.0178864	0.508809	0.0739312	6.8822	5.8936e-12	5.42391e-11
ENSG00000031698	4309.26	SARS1	seryl-tRNA synthetase 1 [Source:HGNC Symbol;Acc:HGNC:10537]	-0.470606	0.0436795	-10.7741	4.56416e-27	7.06854e-25	-0.632696	0.0438951	-14.4138	4.23556e-47	2.5633e-45
ENSG00000031823	1700.88	RANBP3	RAN binding protein 3 [Source:HGNC Symbol;Acc:HGNC:9850]	0.239654	0.0442584	5.41488	6.13288e-08	1.07081e-06	0.666884	0.0433534	15.3825	2.14482e-53	1.69032e-51
ENSG00000032219	375.422	ARID4A	AT-rich interaction domain 4A [Source:HGNC Symbol;Acc:HGNC:9885]	0.162453	0.0821914	1.97653	0.0480953	0.133825	0.331848	0.0813416	4.07968	4.50972e-05	0.000200357
ENSG00000032389	687.793	EIPR1	EARP complex and GARP complex interacting protein 1 [Source:HGNC Symbol;Acc:HGNC:12383]	-0.162802	0.0537225	-3.03043	0.00244205	0.012494	-0.575747	0.056195	-10.2455	1.23961e-24	2.56937e-23
ENSG00000032444	1421.15	PNPLA6	patatin like phospholipase domain containing 6 [Source:HGNC Symbol;Acc:HGNC:16268]	-0.0512555	0.0559472	-0.91614	0.359593	0.554686	0.106623	0.0555933	1.91791	0.0551227	0.125783
ENSG00000032742	510.957	IFT88	intraflagellar transport 88 [Source:HGNC Symbol;Acc:HGNC:20606]	0.0153401	0.0617326	0.248493	0.803753	0.895675	0.183885	0.0608114	3.02385	0.00249576	0.00830912
ENSG00000033011	770.468	ALG1	ALG1 chitobiosyldiphosphodolichol beta-mannosyltransferase [Source:HGNC Symbol;Acc:HGNC:18294]	0.00362796	0.0501775	0.0723025	0.942361	0.97296	0.100536	0.0497995	2.01881	0.0435069	0.103283
ENSG00000033030	472.595	ZCCHC8	zinc finger CCHC-type containing 8 [Source:HGNC Symbol;Acc:HGNC:25265]	-0.0570288	0.0665239	-0.857268	0.391297	0.587012	-0.0782589	0.066742	-1.17256	0.240973	0.401229
ENSG00000033050	452.671	ABCF2	ATP binding cassette subfamily F member 2 [Source:HGNC Symbol;Acc:HGNC:71]	0.15016	0.0643346	2.33404	0.0195934	0.0673089	0.158386	0.0643831	2.46005	0.0138917	0.0383904
ENSG00000033100	920.339	CHPF2	chondroitin polymerizing factor 2 [Source:HGNC Symbol;Acc:HGNC:29270]	-0.143826	0.0552136	-2.60491	0.00918991	0.0367932	-0.342013	0.0560915	-6.09741	1.078e-09	8.1258e-09
ENSG00000033122	56.352	LRRC7	leucine rich repeat containing 7 [Source:HGNC Symbol;Acc:HGNC:18531]	0.1567	0.169636	0.923745	0.355619	0.55075	-0.158644	0.176251	-0.900102	0.368066	0.541548
ENSG00000033170	362.577	FUT8	fucosyltransferase 8 [Source:HGNC Symbol;Acc:HGNC:4019]	0.0881839	0.0799751	1.10264	0.270182	0.459547	0.157548	0.0796046	1.97913	0.0478016	0.111634
ENSG00000033178	1837.75	UBA6	ubiquitin like modifier activating enzyme 6 [Source:HGNC Symbol;Acc:HGNC:25581]	0.0188158	0.0459078	0.40986	0.681908	0.817768	0.321363	0.0453303	7.08936	1.34736e-12	1.3096e-11
ENSG00000033327	29.6341	GAB2	GRB2 associated binding protein 2 [Source:HGNC Symbol;Acc:HGNC:14458]	0.00301579	0.265459	0.0113607	0.990936	0.995202	0.425599	0.257106	1.65534	0.0978552	0.20156
ENSG00000033627	1126.07	ATP6V0A1	ATPase H+ transporting V0 subunit a1 [Source:HGNC Symbol;Acc:HGNC:865]	-0.0431813	0.0563022	-0.766955	0.443108	0.633686	-0.101132	0.0565291	-1.78903	0.0736102	0.160148
ENSG00000033800	664.333	PIAS1	protein inhibitor of activated STAT 1 [Source:HGNC Symbol;Acc:HGNC:2752]	0.260894	0.0631294	4.13268	3.58552e-05	0.000333803	0.705676	0.0614918	11.4759	1.74307e-30	4.90219e-29
ENSG00000033867	1443.26	SLC4A7	solute carrier family 4 member 7 [Source:HGNC Symbol;Acc:HGNC:11033]	0.251505	0.0625939	4.01804	5.8684e-05	0.00051194	0.43204	0.0623118	6.93352	4.10493e-12	3.82783e-11
ENSG00000034053	738.038	APBA2	amyloid beta precursor protein binding family A member 2 [Source:HGNC Symbol;Acc:HGNC:579]	0.0534383	0.0540474	0.98873	0.322795	0.517365	-0.340028	0.0560861	-6.06259	1.33943e-09	9.99295e-09
ENSG00000034152	1802.26	MAP2K3	mitogen-activated protein kinase kinase 3 [Source:HGNC Symbol;Acc:HGNC:6843]	-0.0107712	0.0398863	-0.270047	0.787124	0.885691	-0.28858	0.0407013	-7.09021	1.33911e-12	1.30218e-11
ENSG00000034239	0.0317887	EFCAB1	EF-hand calcium binding domain 1 [Source:HGNC Symbol;Acc:HGNC:25678]	0	5.94781	0	1	NA	0	5.94781	0	1	NA
ENSG00000034510	1708.63	TMSB10	thymosin beta 10 [Source:HGNC Symbol;Acc:HGNC:11879]	-0.0726787	0.054984	-1.32181	0.18623	0.357218	-0.135438	0.055153	-2.45568	0.0140618	0.0388234
ENSG00000034533	132.225	ASTE1	asteroid homolog 1 [Source:HGNC Symbol;Acc:HGNC:25021]	0.0480094	0.111453	0.430758	0.666644	0.807593	-0.520986	0.119024	-4.37714	1.20244e-05	5.78514e-05
ENSG00000034677	646.789	RNF19A	ring finger protein 19A, RBR E3 ubiquitin protein ligase [Source:HGNC Symbol;Acc:HGNC:13432]	-0.195577	0.0570574	-3.42773	0.000608653	0.00396177	0.0815221	0.055447	1.47027	0.141488	0.270368
ENSG00000034693	503.743	PEX3	peroxisomal biogenesis factor 3 [Source:HGNC Symbol;Acc:HGNC:8858]	-0.0655388	0.0691219	-0.948163	0.343046	0.538008	0.00153435	0.0688475	0.0222862	0.98222	0.989906
ENSG00000034713	2272.55	GABARAPL2	GABA type A receptor associated protein like 2 [Source:HGNC Symbol;Acc:HGNC:13291]	-0.104409	0.035011	-2.98218	0.00286204	0.0142227	0.1614	0.0343895	4.6933	2.68832e-06	1.40475e-05
ENSG00000034971	0.0284688	MYOC	myocilin [Source:HGNC Symbol;Acc:HGNC:7610]	-0.496359	5.94781	-0.0834525	0.933492	NA	-0.479955	5.94781	-0.0806945	0.935685	NA
ENSG00000035115	293.266	SH3YL1	SH3 and SYLF domain containing 1 [Source:HGNC Symbol;Acc:HGNC:29546]	-0.270732	0.084371	-3.20883	0.00133275	0.00756549	-0.148824	0.0834765	-1.78282	0.0746154	0.161852
ENSG00000035141	1226.32	FAM136A	family with sequence similarity 136 member A [Source:HGNC Symbol;Acc:HGNC:25911]	0.131211	0.04483	2.92685	0.00342412	0.0165008	0.326607	0.0442667	7.37817	1.60483e-13	1.683e-12
ENSG00000035403	4355.88	VCL	vinculin [Source:HGNC Symbol;Acc:HGNC:12665]	0.280838	0.0275795	10.1829	2.36462e-24	3.02213e-22	0.439224	0.027387	16.0377	6.96846e-58	6.28978e-56
ENSG00000035499	790.363	DEPDC1B	DEP domain containing 1B [Source:HGNC Symbol;Acc:HGNC:24902]	-0.00369599	0.0655792	-0.0563592	0.955056	0.978698	0.684996	0.0635383	10.7808	4.24011e-27	9.97276e-26
ENSG00000035664	200.528	DAPK2	death associated protein kinase 2 [Source:HGNC Symbol;Acc:HGNC:2675]	-0.230203	0.106557	-2.16039	0.0307428	0.0951336	-0.408236	0.109172	-3.73938	0.000184471	0.000745402
ENSG00000035681	669.62	NSMAF	neutral sphingomyelinase activation associated factor [Source:HGNC Symbol;Acc:HGNC:8017]	-0.105984	0.0563245	-1.88167	0.0598808	0.157151	0.136961	0.0553275	2.47545	0.0133067	0.0370047
ENSG00000035687	1002.23	ADSS2	adenylosuccinate synthase 2 [Source:HGNC Symbol;Acc:HGNC:292]	0.094047	0.046789	2.01003	0.0444285	0.126155	0.198178	0.0464588	4.26568	1.99298e-05	9.31278e-05
ENSG00000035720	0.79828	STAP1	signal transducing adaptor family member 1 [Source:HGNC Symbol;Acc:HGNC:24133]	0.968579	1.52992	0.633089	0.526675	NA	1.66789	1.47734	1.12898	0.258908	NA
ENSG00000035862	344.651	TIMP2	TIMP metallopeptidase inhibitor 2 [Source:HGNC Symbol;Acc:HGNC:11821]	-0.00531405	0.0810653	-0.0655527	0.947734	0.975142	-0.231486	0.0830889	-2.786	0.00533627	0.0165018
ENSG00000035928	2471.86	RFC1	replication factor C subunit 1 [Source:HGNC Symbol;Acc:HGNC:9969]	0.0114789	0.0375437	0.305747	0.759797	0.868151	0.177551	0.0372646	4.76459	1.89234e-06	1.00473e-05
ENSG00000036054	694.863	TBC1D23	TBC1 domain family member 23 [Source:HGNC Symbol;Acc:HGNC:25622]	-0.0855458	0.0526709	-1.62416	0.104342	0.237271	-0.00642039	0.0523361	-0.122676	0.902364	0.946881
ENSG00000036257	1836.03	CUL3	cullin 3 [Source:HGNC Symbol;Acc:HGNC:2553]	0.212052	0.038394	5.52305	3.33165e-08	6.11686e-07	0.314315	0.0381703	8.23453	1.80266e-16	2.3387e-15
ENSG00000036448	24.9063	MYOM2	myomesin 2 [Source:HGNC Symbol;Acc:HGNC:7614]	0.0225379	0.281213	0.0801452	0.936122	0.969713	0.033728	0.281355	0.119877	0.90458	0.948181
ENSG00000036473	0	OTC	ornithine carbamoyltransferase [Source:HGNC Symbol;Acc:HGNC:8512]	NA	NA	NA	NA	NA	NA	NA	NA	NA	NA
ENSG00000036530	23.3755	CYP46A1	cytochrome P450 family 46 subfamily A member 1 [Source:HGNC Symbol;Acc:HGNC:2641]	0.00291239	0.30723	0.00947952	0.992437	NA	-0.0358192	0.308737	-0.116018	0.907638	0.949747
ENSG00000036549	1485.01	AC118549.1	zinc finger ZZ-type containing 3 [Source:NCBI gene;Acc:26009]	0.1245	0.0437041	2.8487	0.00438988	0.0202695	-0.0155142	0.0441291	-0.351564	0.725165	0.834809
ENSG00000036565	0.0575369	SLC18A1	solute carrier family 18 member A1 [Source:HGNC Symbol;Acc:HGNC:10934]	0	5.94781	0	1	NA	0	5.94781	0	1	NA
ENSG00000036672	88.488	USP2	ubiquitin specific peptidase 2 [Source:HGNC Symbol;Acc:HGNC:12618]	0.247992	0.147261	1.68403	0.0921766	0.216603	-0.32055	0.156024	-2.05448	0.0399289	0.0961348
ENSG00000036828	0.179482	CASR	calcium sensing receptor [Source:HGNC Symbol;Acc:HGNC:1514]	0.224926	4.8955	0.0459454	0.963354	NA	0.24133	4.8955	0.0492964	0.960683	NA
ENSG00000037042	305.571	TUBG2	tubulin gamma 2 [Source:HGNC Symbol;Acc:HGNC:12419]	-0.255851	0.0780587	-3.27768	0.00104665	0.00618961	-0.064872	0.0764533	-0.848518	0.39615	0.568261
ENSG00000037241	1213.57	RPL26L1	ribosomal protein L26 like 1 [Source:HGNC Symbol;Acc:HGNC:17050]	0.00348659	0.045055	0.0773851	0.938317	0.970383	0.223918	0.0443885	5.0445	4.54706e-07	2.62114e-06
ENSG00000037280	20.6952	FLT4	fms related tyrosine kinase 4 [Source:HGNC Symbol;Acc:HGNC:3767]	-0.300972	0.276014	-1.09043	0.275526	NA	-0.863104	0.294836	-2.92741	0.00341801	0.0110301
ENSG00000037474	3111.73	NSUN2	NOP2/Sun RNA methyltransferase 2 [Source:HGNC Symbol;Acc:HGNC:25994]	0.0774462	0.0310395	2.49509	0.0125926	0.0475254	-0.0198103	0.0312478	-0.633974	0.526098	0.684936
ENSG00000037637	712.097	FBXO42	F-box protein 42 [Source:HGNC Symbol;Acc:HGNC:29249]	-0.0752972	0.0496282	-1.51723	0.129209	0.277167	0.0592175	0.0490319	1.20773	0.22715	0.385228
ENSG00000037749	831.913	MFAP3	microfibril associated protein 3 [Source:HGNC Symbol;Acc:HGNC:7034]	0.00183272	0.0606672	0.0302093	0.9759	0.988896	0.0140846	0.0606799	0.232112	0.816451	0.894644
ENSG00000037757	256.266	MRI1	methylthioribose-1-phosphate isomerase 1 [Source:HGNC Symbol;Acc:HGNC:28469]	0.137153	0.086974	1.57695	0.114808	0.253919	0.084606	0.0875261	0.966638	0.333725	0.506693
ENSG00000037897	339.354	METTL1	methyltransferase like 1 [Source:HGNC Symbol;Acc:HGNC:7030]	0.200701	0.0760035	2.64068	0.00827407	0.033995	0.00674855	0.0773507	0.0872462	0.930476	0.961806
ENSG00000037965	3.88281	HOXC8	homeobox C8 [Source:NCBI gene;Acc:3224]	0.496638	0.738724	0.672292	0.501398	NA	-0.989942	0.877776	-1.12778	0.259411	0.423124
ENSG00000038002	569.645	AGA	aspartylglucosaminidase [Source:HGNC Symbol;Acc:HGNC:318]	-0.291549	0.0617368	-4.72246	2.33009e-06	2.93826e-05	-0.194234	0.0612392	-3.17172	0.00151537	0.0052452
ENSG00000038210	1129.17	PI4K2B	phosphatidylinositol 4-kinase type 2 beta [Source:HGNC Symbol;Acc:HGNC:18215]	0.0643397	0.0478435	1.34479	0.178691	0.346895	0.219333	0.0473912	4.62815	3.68953e-06	1.89879e-05
ENSG00000038219	1349.16	BOD1L1	biorientation of chromosomes in cell division 1 like 1 [Source:HGNC Symbol;Acc:HGNC:31792]	0.0788016	0.0558886	1.40998	0.158547	0.320404	0.300433	0.0554232	5.42072	5.9361e-08	3.79239e-07
ENSG00000038274	921.275	MAT2B	methionine adenosyltransferase 2B [Source:HGNC Symbol;Acc:HGNC:6905]	0.0503284	0.0469746	1.07139	0.283992	0.474064	0.325071	0.0459634	7.0724	1.52274e-12	1.47194e-11
ENSG00000038295	78.5731	TLL1	tolloid like 1 [Source:HGNC Symbol;Acc:HGNC:11843]	0.158362	0.191318	0.827743	0.407816	0.601377	-0.0697252	0.195872	-0.355974	0.72186	0.832682
ENSG00000038358	1127.79	EDC4	enhancer of mRNA decapping 4 [Source:HGNC Symbol;Acc:HGNC:17157]	-0.0128572	0.0449336	-0.286138	0.774772	0.878022	-0.107937	0.0453562	-2.37976	0.0173238	0.0465918
ENSG00000038382	911.391	TRIO	trio Rho guanine nucleotide exchange factor [Source:HGNC Symbol;Acc:HGNC:12303]	0.0871695	0.0479673	1.81727	0.0691763	0.175531	0.107667	0.0479506	2.24538	0.0247436	0.0637451
ENSG00000038427	0	VCAN	versican [Source:HGNC Symbol;Acc:HGNC:2464]	NA	NA	NA	NA	NA	NA	NA	NA	NA	NA
ENSG00000038532	658.534	CLEC16A	C-type lectin domain containing 16A [Source:HGNC Symbol;Acc:HGNC:29013]	0.0562167	0.0553035	1.01651	0.309386	0.502747	-0.169727	0.0565693	-3.00033	0.00269685	0.00890977
ENSG00000038945	0.116716	MSR1	macrophage scavenger receptor 1 [Source:HGNC Symbol;Acc:HGNC:7376]	-0.501891	5.9463	-0.0844039	0.932735	NA	-1.20682	5.9463	-0.202953	0.839171	NA
ENSG00000039068	10957.8	CDH1	cadherin 1 [Source:HGNC Symbol;Acc:HGNC:1748]	-0.00183501	0.0199	-0.0922114	0.92653	0.96515	0.0240851	0.0198912	1.21084	0.225955	0.383696
ENSG00000039123	2029.14	MTREX	Mtr4 exosome RNA helicase [Source:HGNC Symbol;Acc:HGNC:18734]	0.209532	0.0371847	5.63491	1.75153e-08	3.37092e-07	0.717889	0.0360662	19.9047	3.70152e-88	7.97754e-86
ENSG00000039139	206.149	DNAH5	dynein axonemal heavy chain 5 [Source:HGNC Symbol;Acc:HGNC:2950]	-0.175484	0.0911378	-1.92548	0.0541698	0.146425	0.11931	0.0889139	1.34186	0.179643	0.324654
ENSG00000039319	1771.62	ZFYVE16	zinc finger FYVE-type containing 16 [Source:HGNC Symbol;Acc:HGNC:20756]	0.125717	0.0412906	3.04469	0.00232922	0.012029	0.46717	0.0405999	11.5067	1.22084e-30	3.46576e-29
ENSG00000039523	913.925	RIPOR1	RHO family interacting cell polarization regulator 1 [Source:HGNC Symbol;Acc:HGNC:25836]	0.0850253	0.0440113	1.9319	0.0533719	0.144749	-0.221025	0.0455275	-4.85476	1.20535e-06	6.56986e-06
ENSG00000039537	0.0895402	C6	complement C6 [Source:HGNC Symbol;Acc:HGNC:1339]	0.22495	5.94781	0.0378206	0.969831	NA	-0.47998	5.94781	-0.0806987	0.935682	NA
ENSG00000039560	940.618	RAI14	retinoic acid induced 14 [Source:HGNC Symbol;Acc:HGNC:14873]	0.332683	0.0527972	6.30116	2.95424e-10	8.30976e-09	0.622924	0.0518643	12.0106	3.12382e-33	1.01039e-31
ENSG00000039600	0.0545509	SOX30	SRY-box transcription factor 30 [Source:HGNC Symbol;Acc:HGNC:30635]	0	5.94781	0	1	NA	0	5.94781	0	1	NA
ENSG00000039650	617.242	PNKP	polynucleotide kinase 3'-phosphatase [Source:HGNC Symbol;Acc:HGNC:9154]	-0.00933611	0.0707388	-0.13198	0.895	0.948346	0.00234055	0.070757	0.0330787	0.973612	0.984755
ENSG00000039987	1.00919	BEST2	bestrophin 2 [Source:HGNC Symbol;Acc:HGNC:17107]	-0.0404753	1.42264	-0.0284508	0.977303	NA	-2.03545	1.62447	-1.25299	0.210209	NA
ENSG00000040199	809.104	PHLPP2	PH domain and leucine rich repeat protein phosphatase 2 [Source:HGNC Symbol;Acc:HGNC:29149]	0.365666	0.0534228	6.84477	7.65996e-12	2.75507e-10	0.613362	0.0525189	11.6789	1.63461e-31	4.84217e-30
ENSG00000040275	991.014	SPDL1	spindle apparatus coiled-coil protein 1 [Source:HGNC Symbol;Acc:HGNC:26010]	0.0862909	0.0563178	1.53222	0.125469	0.271235	0.511349	0.05517	9.26862	1.88569e-20	3.19387e-19
ENSG00000040341	875.183	STAU2	staufen double-stranded RNA binding protein 2 [Source:HGNC Symbol;Acc:HGNC:11371]	0.114633	0.0559733	2.04799	0.0405608	0.117531	0.286099	0.0553794	5.16616	2.38957e-07	1.42531e-06
ENSG00000040487	207.618	SLC66A1	solute carrier family 66 member 1 [Source:HGNC Symbol;Acc:HGNC:26001]	0.150664	0.0937224	1.60755	0.107933	0.243127	0.200874	0.0934176	2.15028	0.0315328	0.0785846
ENSG00000040531	403.911	CTNS	cystinosin, lysosomal cystine transporter [Source:HGNC Symbol;Acc:HGNC:2518]	0.00169629	0.0690025	0.0245831	0.980388	0.99082	-0.0952503	0.0697773	-1.36506	0.172234	0.31458
ENSG00000040608	103.427	RTN4R	reticulon 4 receptor [Source:HGNC Symbol;Acc:HGNC:18601]	-0.0301359	0.136403	-0.220933	0.825145	0.907604	-0.189239	0.139029	-1.36115	0.173467	0.316225
ENSG00000040633	1258.79	PHF23	PHD finger protein 23 [Source:HGNC Symbol;Acc:HGNC:28428]	-0.0910795	0.0419024	-2.17361	0.0297344	0.0928866	-0.288612	0.0427043	-6.75838	1.39542e-11	1.23939e-10
ENSG00000040731	0.0651736	CDH10	cadherin 10 [Source:HGNC Symbol;Acc:HGNC:1749]	0	5.94781	0	1	NA	0.962587	5.94781	0.161839	0.871433	NA
ENSG00000040933	470.694	INPP4A	inositol polyphosphate-4-phosphatase type I A [Source:HGNC Symbol;Acc:HGNC:6074]	-0.10687	0.0689357	-1.55028	0.121074	0.264316	-0.273379	0.0700764	-3.90115	9.57375e-05	0.000404333
ENSG00000041353	368.066	RAB27B	RAB27B, member RAS oncogene family [Source:HGNC Symbol;Acc:HGNC:9767]	0.162961	0.0780851	2.08697	0.0368907	0.108983	-0.348928	0.0820078	-4.25481	2.09224e-05	9.74641e-05
ENSG00000041357	5258.5	PSMA4	proteasome 20S subunit alpha 4 [Source:HGNC Symbol;Acc:HGNC:9533]	0.0271571	0.0305968	0.88758	0.374767	0.570209	0.271495	0.0303419	8.94784	3.62511e-19	5.66735e-18
ENSG00000041515	0.344044	MYO16	myosin XVI [Source:HGNC Symbol;Acc:HGNC:29822]	0	3.07375	0	1	NA	1.67539	3.07332	0.545141	0.585656	NA
ENSG00000041802	1903.18	LSG1	large 60S subunit nuclear export GTPase 1 [Source:HGNC Symbol;Acc:HGNC:25652]	0.101691	0.0309998	3.28038	0.00103667	0.00614718	-0.276334	0.0322153	-8.57773	9.67612e-18	1.3753e-16
ENSG00000041880	364.813	PARP3	poly(ADP-ribose) polymerase family member 3 [Source:HGNC Symbol;Acc:HGNC:273]	0.0438803	0.0864343	0.507673	0.611683	0.768486	0.0764248	0.086326	0.885305	0.375992	0.549015
ENSG00000041982	7.02414	TNC	tenascin C [Source:HGNC Symbol;Acc:HGNC:5318]	-0.317087	0.519296	-0.610609	0.541458	NA	0.943026	0.457369	2.06185	0.0392221	0.0947728
ENSG00000041988	288.473	THAP3	THAP domain containing 3 [Source:HGNC Symbol;Acc:HGNC:20855]	0.141986	0.0790616	1.79589	0.0725127	0.182133	0.302404	0.0779397	3.87998	0.000104467	0.000438919
ENSG00000042062	7.13435	RIPOR3	RIPOR family member 3 [Source:HGNC Symbol;Acc:HGNC:16168]	-0.177613	0.560144	-0.317085	0.751179	NA	0.518553	0.520166	0.996899	0.318813	0.490859
ENSG00000042088	1004.44	TDP1	tyrosyl-DNA phosphodiesterase 1 [Source:HGNC Symbol;Acc:HGNC:18884]	0.0921557	0.0525309	1.75431	0.0793768	0.194947	0.0637982	0.0526816	1.21101	0.22589	0.383646
ENSG00000042286	60.4711	AIFM2	apoptosis inducing factor mitochondria associated 2 [Source:HGNC Symbol;Acc:HGNC:21411]	-0.149959	0.169963	-0.8823	0.377615	0.573281	-0.275379	0.172964	-1.59212	0.111358	0.224041
ENSG00000042304	0	C2orf83	chromosome 2 open reading frame 83 [Source:HGNC Symbol;Acc:HGNC:25344]	NA	NA	NA	NA	NA	NA	NA	NA	NA	NA
ENSG00000042317	124.877	AL049834.1	spermatogenesis associated 7 [Source:NCBI gene;Acc:55812]	-0.158777	0.118034	-1.34518	0.178569	0.346759	-0.0119696	0.116349	-0.102877	0.918061	0.954593
ENSG00000042429	58.5465	MED17	mediator complex subunit 17 [Source:HGNC Symbol;Acc:HGNC:2375]	0.0201248	0.171647	0.117245	0.906666	0.955133	0.179918	0.169226	1.06318	0.287698	0.455986
ENSG00000042445	1886.71	RETSAT	retinol saturase [Source:HGNC Symbol;Acc:HGNC:25991]	-0.0991424	0.0352674	-2.81116	0.00493631	0.0223535	0.306621	0.0341522	8.97808	2.75529e-19	4.35587e-18
ENSG00000042493	15.289	CAPG	capping actin protein, gelsolin like [Source:HGNC Symbol;Acc:HGNC:1474]	0.382531	0.331348	1.15447	0.248308	NA	0.167653	0.339562	0.493733	0.621494	0.763795
ENSG00000042753	3005.56	AP2S1	adaptor related protein complex 2 subunit sigma 1 [Source:HGNC Symbol;Acc:HGNC:565]	-0.0979436	0.0403718	-2.42604	0.0152645	0.0554171	-0.165429	0.0405029	-4.08437	4.41973e-05	0.000196773
ENSG00000042781	2.83889	USH2A	usherin [Source:HGNC Symbol;Acc:HGNC:12601]	-0.517381	0.767082	-0.674479	0.500007	NA	-1.1055	0.817079	-1.35299	0.176059	0.319875
ENSG00000042813	0.064054	ZPBP	zona pellucida binding protein [Source:HGNC Symbol;Acc:HGNC:15662]	0	5.94781	0	1	NA	1.6743	5.9476	0.281509	0.77832	NA
ENSG00000042832	6.51379	TG	thyroglobulin [Source:HGNC Symbol;Acc:HGNC:11764]	0.209551	0.576501	0.363488	0.716241	NA	0.585829	0.560768	1.04469	0.296165	0.465286
ENSG00000042980	1.54233	ADAM28	ADAM metallopeptidase domain 28 [Source:HGNC Symbol;Acc:HGNC:206]	-0.030724	1.04667	-0.0293539	0.976582	NA	-1.73796	1.25706	-1.38256	0.1668	0.306994
ENSG00000043039	30.6561	BARX2	BARX homeobox 2 [Source:HGNC Symbol;Acc:HGNC:956]	0.178688	0.252581	0.707446	0.47929	0.66599	0.303237	0.250279	1.21159	0.225668	0.38333
ENSG00000043093	2198.22	DCUN1D1	defective in cullin neddylation 1 domain containing 1 [Source:HGNC Symbol;Acc:HGNC:18184]	0.163834	0.0503103	3.25647	0.00112809	0.00659275	0.219896	0.0502431	4.37664	1.20523e-05	5.79723e-05
ENSG00000043143	213.835	JADE2	jade family PHD finger 2 [Source:HGNC Symbol;Acc:HGNC:22984]	0.132801	0.105058	1.26407	0.206204	0.383562	-0.195763	0.108265	-1.80819	0.0705769	0.154568
ENSG00000043355	323.868	ZIC2	Zic family member 2 [Source:HGNC Symbol;Acc:HGNC:12873]	0.606116	0.0882809	6.86576	6.61362e-12	2.39839e-10	0.433596	0.0893456	4.85302	1.21593e-06	6.62242e-06
ENSG00000043462	0.930124	LCP2	lymphocyte cytosolic protein 2 [Source:HGNC Symbol;Acc:HGNC:6529]	1.82829	1.39006	1.31526	0.188424	NA	1.66578	1.40094	1.18904	0.234424	NA
ENSG00000043514	570.862	TRIT1	tRNA isopentenyltransferase 1 [Source:HGNC Symbol;Acc:HGNC:20286]	0.255781	0.0651676	3.92497	8.6742e-05	0.00072362	0.5314	0.0640634	8.29491	1.08671e-16	1.43542e-15
ENSG00000043591	14.7404	ADRB1	adrenoceptor beta 1 [Source:HGNC Symbol;Acc:HGNC:285]	-0.368201	0.371432	-0.9913	0.321539	NA	0.62813	0.339406	1.85068	0.0642162	0.14298
ENSG00000044012	0.033796	GUCA2B	guanylate cyclase activator 2B [Source:HGNC Symbol;Acc:HGNC:4683]	0.946195	5.94781	0.159083	0.873603	NA	0	5.94781	0	1	NA
ENSG00000044090	753.057	CUL7	cullin 7 [Source:HGNC Symbol;Acc:HGNC:21024]	-0.0462289	0.0480584	-0.96193	0.336085	0.53131	-0.396097	0.0500391	-7.91575	2.45765e-15	2.96278e-14
ENSG00000044115	8065.8	CTNNA1	catenin alpha 1 [Source:HGNC Symbol;Acc:HGNC:2509]	-0.0186972	0.0255045	-0.733096	0.4635	0.653197	0.230249	0.0252934	9.10312	8.77718e-20	1.42383e-18
ENSG00000044446	374.546	PHKA2	phosphorylase kinase regulatory subunit alpha 2 [Source:HGNC Symbol;Acc:HGNC:8926]	-0.0942981	0.0678224	-1.39037	0.164417	0.327684	-0.16347	0.0684608	-2.38778	0.0169503	0.0456933
ENSG00000044459	495.645	CNTLN	centlein [Source:HGNC Symbol;Acc:HGNC:23432]	0.117774	0.0744648	1.58161	0.113738	0.252701	0.562903	0.0726438	7.7488	9.27641e-15	1.0654e-13
ENSG00000044524	5.51905	EPHA3	EPH receptor A3 [Source:HGNC Symbol;Acc:HGNC:3387]	-0.316506	0.706707	-0.44786	0.654255	NA	1.28265	0.611256	2.09838	0.0358713	0.0877001
ENSG00000044574	14251.5	HSPA5	heat shock protein family A (Hsp70) member 5 [Source:HGNC Symbol;Acc:HGNC:5238]	-0.459533	0.0296052	-15.522	2.46131e-54	1.24618e-51	-0.331579	0.0295481	-11.2217	3.19113e-29	8.34157e-28
ENSG00000046604	5258.47	DSG2	desmoglein 2 [Source:HGNC Symbol;Acc:HGNC:3049]	0.00358806	0.0384711	0.0932662	0.925692	0.964732	0.037394	0.0384544	0.972424	0.33084	0.503471
ENSG00000046647	342.332	GEMIN8	gem nuclear organelle associated protein 8 [Source:HGNC Symbol;Acc:HGNC:26044]	-0.159481	0.075951	-2.09978	0.0357479	0.106612	-0.380416	0.0777737	-4.89131	1.00165e-06	5.52661e-06
ENSG00000046651	106.474	OFD1	OFD1 centriole and centriolar satellite protein [Source:HGNC Symbol;Acc:HGNC:2567]	-0.250224	0.127139	-1.96812	0.0490545	0.136005	-0.191666	0.126559	-1.51443	0.129916	0.252783
ENSG00000046653	72.4722	GPM6B	glycoprotein M6B [Source:HGNC Symbol;Acc:HGNC:4461]	-0.349659	0.186682	-1.87302	0.0610658	0.159322	-0.0200719	0.182071	-0.110242	0.912217	0.9523
ENSG00000046774	0.356737	MAGEC2	MAGE family member C2 [Source:HGNC Symbol;Acc:HGNC:13574]	-1.51056	2.50599	-0.602777	0.546657	NA	-1.49415	2.50599	-0.596231	0.551021	NA
ENSG00000046889	10.7615	PREX2	phosphatidylinositol-3,4,5-trisphosphate dependent Rac exchange factor 2 [Source:HGNC Symbol;Acc:HGNC:22950]	0.426496	0.377314	1.13035	0.258329	NA	0.0411487	0.391325	0.105152	0.916255	0.953765
ENSG00000047056	724.191	WDR37	WD repeat domain 37 [Source:HGNC Symbol;Acc:HGNC:31406]	0.119719	0.0522104	2.29301	0.0218476	0.0734991	0.151653	0.0521396	2.9086	0.00363055	0.0116572
ENSG00000047188	1847.98	YTHDC2	YTH domain containing 2 [Source:HGNC Symbol;Acc:HGNC:24721]	0.107693	0.047299	2.27686	0.0227947	0.0760055	0.458981	0.0466609	9.83652	7.83773e-23	1.4954e-21
ENSG00000047230	708.086	CTPS2	CTP synthase 2 [Source:HGNC Symbol;Acc:HGNC:2520]	-0.0308758	0.0542926	-0.568692	0.569565	0.738404	-0.217264	0.0552881	-3.92968	8.50603e-05	0.000362941
ENSG00000047249	1586.38	ATP6V1H	ATPase H+ transporting V1 subunit H [Source:HGNC Symbol;Acc:HGNC:18303]	-0.0599186	0.0396789	-1.51009	0.131021	0.279715	-0.0230077	0.039612	-0.580827	0.561357	0.714968
ENSG00000047315	4113.67	POLR2B	RNA polymerase II subunit B [Source:HGNC Symbol;Acc:HGNC:9188]	-0.0368645	0.0332274	-1.10946	0.267232	0.456269	-0.0171447	0.0332216	-0.516072	0.605804	0.752304
ENSG00000047346	2911.76	FAM214A	family with sequence similarity 214 member A [Source:HGNC Symbol;Acc:HGNC:25609]	-0.180938	0.0389226	-4.64867	3.34081e-06	4.06455e-05	-0.0864714	0.0387955	-2.2289	0.0258205	0.0662002
ENSG00000047365	114.614	ARAP2	ArfGAP with RhoGAP domain, ankyrin repeat and PH domain 2 [Source:HGNC Symbol;Acc:HGNC:16924]	0.224855	0.136264	1.65014	0.0989152	0.228289	-0.245582	0.141039	-1.74123	0.0816433	0.174392
ENSG00000047410	2947.79	TPR	translocated promoter region, nuclear basket protein [Source:HGNC Symbol;Acc:HGNC:12017]	0.0922721	0.0379628	2.43059	0.0150742	0.0548462	0.229217	0.0377765	6.06772	1.29743e-09	9.70017e-09
ENSG00000047457	1.68741	CP	ceruloplasmin [Source:HGNC Symbol;Acc:HGNC:2295]	1.45712	1.22367	1.19078	0.23374	NA	0.23122	1.37744	0.167863	0.866691	0.925439
ENSG00000047578	579.735	KIAA0556	KIAA0556 [Source:HGNC Symbol;Acc:HGNC:29068]	-0.129949	0.0544409	-2.38697	0.0169879	0.0603748	-0.461982	0.0567366	-8.14259	3.86924e-16	4.89648e-15
ENSG00000047579	331.268	DTNBP1	dystrobrevin binding protein 1 [Source:HGNC Symbol;Acc:HGNC:17328]	0.376414	0.0878055	4.28691	1.81179e-05	0.000182622	0.464802	0.0873692	5.31998	1.03781e-07	6.43368e-07
ENSG00000047597	0.193378	XK	X-linked Kx blood group [Source:HGNC Symbol;Acc:HGNC:12811]	0	5.94781	0	1	NA	2.68689	5.90382	0.455111	0.64903	NA
ENSG00000047617	7.71562	ANO2	anoctamin 2 [Source:HGNC Symbol;Acc:HGNC:1183]	-0.087974	0.485378	-0.181249	0.856172	NA	-0.28311	0.496941	-0.569705	0.568878	0.72141
ENSG00000047621	613.347	C12orf4	chromosome 12 open reading frame 4 [Source:HGNC Symbol;Acc:HGNC:1184]	0.0963255	0.0563518	1.70936	0.0873846	0.208582	0.117539	0.0563275	2.0867	0.0369154	0.08994
ENSG00000047634	769.416	SCML1	Scm polycomb group protein like 1 [Source:HGNC Symbol;Acc:HGNC:10580]	0.00801409	0.0528502	0.151638	0.879473	0.937819	0.237735	0.0519364	4.57744	4.70703e-06	2.39387e-05
ENSG00000047644	1221.11	WWC3	WWC family member 3 [Source:HGNC Symbol;Acc:HGNC:29237]	0.0152728	0.0457556	0.333792	0.738537	0.85508	0.376005	0.0446235	8.42616	3.57185e-17	4.89241e-16
ENSG00000047648	2034.16	ARHGAP6	Rho GTPase activating protein 6 [Source:HGNC Symbol;Acc:HGNC:676]	-0.109892	0.0314822	-3.49061	0.000481916	0.00324997	-0.16576	0.0316856	-5.23141	1.68222e-07	1.0201e-06
ENSG00000047662	24.2602	FAM184B	family with sequence similarity 184 member B [Source:HGNC Symbol;Acc:HGNC:29235]	-0.150753	0.286556	-0.526085	0.598829	NA	-1.29853	0.342146	-3.79525	0.000147496	0.000606553
ENSG00000047849	8052.35	MAP4	microtubule associated protein 4 [Source:HGNC Symbol;Acc:HGNC:6862]	-0.0397053	0.0257931	-1.53938	0.123712	0.268413	-0.147774	0.0259097	-5.70342	1.17427e-08	8.01087e-08
ENSG00000047932	747.74	GOPC	golgi associated PDZ and coiled-coil motif containing [Source:HGNC Symbol;Acc:HGNC:17643]	0.100258	0.0511016	1.96194	0.0497698	0.137698	0.0165658	0.0515849	0.321137	0.748106	0.85169
ENSG00000047936	0	ROS1	ROS proto-oncogene 1, receptor tyrosine kinase [Source:HGNC Symbol;Acc:HGNC:10261]	NA	NA	NA	NA	NA	NA	NA	NA	NA	NA
ENSG00000048028	566.915	USP28	ubiquitin specific peptidase 28 [Source:HGNC Symbol;Acc:HGNC:12625]	0.0917876	0.0607301	1.5114	0.130686	0.279126	0.30391	0.0597531	5.08609	3.65512e-07	2.13024e-06
ENSG00000048052	3.71057	HDAC9	histone deacetylase 9 [Source:HGNC Symbol;Acc:HGNC:14065]	1.06114	0.771603	1.37524	0.169057	NA	1.08123	0.771404	1.40164	0.161023	0.29875
ENSG00000048140	1698.57	TSPAN17	tetraspanin 17 [Source:HGNC Symbol;Acc:HGNC:13594]	0.000564092	0.0448585	0.0125749	0.989967	0.994727	-0.132995	0.0452416	-2.93966	0.00328572	0.0106585
ENSG00000048162	705.251	NOP16	NOP16 nucleolar protein [Source:HGNC Symbol;Acc:HGNC:26934]	0.186541	0.0622277	2.99772	0.00272003	0.0136458	-0.32093	0.0643389	-4.98811	6.09719e-07	3.45344e-06
ENSG00000048342	249.206	CC2D2A	coiled-coil and C2 domain containing 2A [Source:HGNC Symbol;Acc:HGNC:29253]	0.0549875	0.0968744	0.567616	0.570295	0.738914	0.0301815	0.097195	0.310525	0.756162	0.85677
ENSG00000048392	2579.88	RRM2B	ribonucleotide reductase regulatory TP53 inducible subunit M2B [Source:HGNC Symbol;Acc:HGNC:17296]	-0.00993397	0.0417556	-0.237907	0.811953	0.900619	0.537774	0.0408923	13.151	1.67947e-39	7.10862e-38
ENSG00000048405	833.607	ZNF800	zinc finger protein 800 [Source:HGNC Symbol;Acc:HGNC:27267]	0.323711	0.0513503	6.30398	2.90104e-10	8.17758e-09	0.132561	0.052154	2.54173	0.0110307	0.0314242
ENSG00000048462	0.192522	TNFRSF17	TNF receptor superfamily member 17 [Source:HGNC Symbol;Acc:HGNC:11913]	1.00499	4.78123	0.210195	0.833516	NA	1.54781	4.74951	0.325889	0.744508	NA
ENSG00000048471	475.456	SNX29	sorting nexin 29 [Source:HGNC Symbol;Acc:HGNC:30542]	0.114149	0.0636027	1.79472	0.0726977	0.182354	-0.0241764	0.0645332	-0.374635	0.707932	0.822469
ENSG00000048540	1.64935	LMO3	LIM domain only 3 [Source:HGNC Symbol;Acc:HGNC:6643]	-1.89477	1.16594	-1.62509	0.104143	NA	-1.46645	1.08994	-1.34544	0.178482	0.323193
ENSG00000048544	1133.56	MRPS10	mitochondrial ribosomal protein S10 [Source:HGNC Symbol;Acc:HGNC:14502]	0.0841591	0.0491503	1.71228	0.0868449	0.20762	0.468864	0.0479854	9.77097	1.50012e-22	2.83145e-21
ENSG00000048545	0	GUCA1A	guanylate cyclase activator 1A [Source:HGNC Symbol;Acc:HGNC:4678]	NA	NA	NA	NA	NA	NA	NA	NA	NA	NA
ENSG00000048649	1645.18	RSF1	remodeling and spacing factor 1 [Source:HGNC Symbol;Acc:HGNC:18118]	0.340171	0.0503948	6.75012	1.47727e-11	5.06426e-10	0.801126	0.0494784	16.1914	5.79729e-59	5.49078e-57
ENSG00000048707	1708.09	VPS13D	vacuolar protein sorting 13 homolog D [Source:HGNC Symbol;Acc:HGNC:23595]	-0.124225	0.0628485	-1.97657	0.0480901	0.133825	-0.528718	0.0636674	-8.30438	1.00341e-16	1.33039e-15
ENSG00000048740	0.291295	CELF2	CUGBP Elav-like family member 2 [Source:HGNC Symbol;Acc:HGNC:2550]	-0.496414	2.8964	-0.17139	0.863917	NA	-0.480009	2.8964	-0.165726	0.868372	NA
ENSG00000048828	5765.96	FAM120A	family with sequence similarity 120A [Source:HGNC Symbol;Acc:HGNC:13247]	0.0165422	0.019808	0.835128	0.403646	0.597711	0.0335287	0.0198068	1.69279	0.0904959	0.189338
ENSG00000048991	1519.68	R3HDM1	R3H domain containing 1 [Source:HGNC Symbol;Acc:HGNC:9757]	0.0872813	0.0426277	2.04753	0.0406063	0.117611	-0.105176	0.0432264	-2.43315	0.0149681	0.0410148
ENSG00000049089	139.151	COL9A2	collagen type IX alpha 2 chain [Source:HGNC Symbol;Acc:HGNC:2218]	-0.201099	0.116703	-1.72316	0.0848595	0.204595	-0.335826	0.118752	-2.82795	0.00468471	0.0147131
ENSG00000049130	147.757	KITLG	KIT ligand [Source:HGNC Symbol;Acc:HGNC:6343]	0.963186	0.139558	6.90167	5.13942e-12	1.90578e-10	1.43112	0.136823	10.4596	1.32429e-25	2.89548e-24
ENSG00000049167	128.77	ERCC8	ERCC excision repair 8, CSA ubiquitin ligase complex subunit [Source:HGNC Symbol;Acc:HGNC:3439]	0.0900071	0.125245	0.718649	0.472357	0.660447	0.275169	0.123361	2.2306	0.0257076	0.0659586
ENSG00000049192	0.72204	ADAMTS6	ADAM metallopeptidase with thrombospondin type 1 motif 6 [Source:HGNC Symbol;Acc:HGNC:222]	1.79657	1.71468	1.04776	0.294751	NA	1.82288	1.71394	1.06356	0.287528	NA
ENSG00000049239	1515.32	H6PD	hexose-6-phosphate dehydrogenase/glucose 1-dehydrogenase [Source:HGNC Symbol;Acc:HGNC:4795]	-0.120671	0.0442552	-2.72671	0.00639697	0.0276188	-0.312397	0.0448789	-6.96087	3.3817e-12	3.17444e-11
ENSG00000049245	1816.44	VAMP3	vesicle associated membrane protein 3 [Source:HGNC Symbol;Acc:HGNC:12644]	0.0979544	0.0436812	2.24248	0.0249302	0.0812331	0.0596536	0.0438044	1.36182	0.173255	0.31595
ENSG00000049246	451.394	PER3	period circadian regulator 3 [Source:HGNC Symbol;Acc:HGNC:8847]	0.302907	0.0705592	4.29295	1.76315e-05	0.000178539	0.459604	0.0697765	6.58681	4.4939e-11	3.80423e-10
ENSG00000049247	1.42405	UTS2	urotensin 2 [Source:HGNC Symbol;Acc:HGNC:12636]	-0.787432	1.26929	-0.620372	0.535013	NA	-0.760669	1.26745	-0.600155	0.548403	0.704109
ENSG00000049249	0.872182	TNFRSF9	TNF receptor superfamily member 9 [Source:HGNC Symbol;Acc:HGNC:11924]	-1.02735	1.42531	-0.720788	0.47104	NA	-0.565552	1.35786	-0.416504	0.677042	NA
ENSG00000049283	2154.73	EPN3	epsin 3 [Source:HGNC Symbol;Acc:HGNC:18235]	0.247643	0.0388832	6.3689	1.90393e-10	5.6322e-09	0.0254555	0.0394078	0.645952	0.51831	0.678176
ENSG00000049323	15.4373	LTBP1	latent transforming growth factor beta binding protein 1 [Source:HGNC Symbol;Acc:HGNC:6714]	0.126712	0.366107	0.346106	0.729263	NA	-0.474062	0.38949	-1.21714	0.223553	0.380656
ENSG00000049449	542.425	RCN1	reticulocalbin 1 [Source:HGNC Symbol;Acc:HGNC:9934]	-0.309922	0.055876	-5.54659	2.91289e-08	5.41026e-07	-1.20486	0.0630253	-19.117	1.82209e-81	3.31762e-79
ENSG00000049540	9.05946	ELN	elastin [Source:HGNC Symbol;Acc:HGNC:3327]	0.110377	0.47816	0.230836	0.817442	NA	-0.690121	0.519139	-1.32936	0.183731	0.330093
ENSG00000049541	1219.21	RFC2	replication factor C subunit 2 [Source:HGNC Symbol;Acc:HGNC:9970]	0.0307122	0.0485185	0.633001	0.526733	0.70399	0.449763	0.0473769	9.4933	2.23841e-21	3.95959e-20
ENSG00000049618	1395.2	ARID1B	AT-rich interaction domain 1B [Source:HGNC Symbol;Acc:HGNC:18040]	0.156851	0.0503831	3.11316	0.00185095	0.00993716	0.184517	0.050353	3.66446	0.000247863	0.000980357
ENSG00000049656	2950.19	CLPTM1L	CLPTM1 like [Source:HGNC Symbol;Acc:HGNC:24308]	-0.0298081	0.0358551	-0.831349	0.405777	0.599848	-0.00919659	0.0358465	-0.256555	0.797523	0.883343
ENSG00000049759	6413.81	NEDD4L	NEDD4 like E3 ubiquitin protein ligase [Source:HGNC Symbol;Acc:HGNC:7728]	0.0465899	0.0318623	1.46223	0.143679	0.299318	0.29958	0.0316696	9.45954	3.09307e-21	5.43501e-20
ENSG00000049768	24.7242	FOXP3	forkhead box P3 [Source:HGNC Symbol;Acc:HGNC:6106]	-0.0979742	0.274509	-0.356907	0.721162	0.844306	-0.461263	0.286448	-1.61029	0.107335	0.21746
ENSG00000049769	129.399	PPP1R3F	protein phosphatase 1 regulatory subunit 3F [Source:HGNC Symbol;Acc:HGNC:14944]	0.118153	0.11942	0.989386	0.322474	0.516932	0.24204	0.118169	2.04826	0.0405349	0.0973089
ENSG00000049860	2697.69	HEXB	hexosaminidase subunit beta [Source:HGNC Symbol;Acc:HGNC:4879]	-0.226715	0.0393349	-5.76371	8.22839e-09	1.74146e-07	-0.127529	0.0391637	-3.2563	0.00112873	0.00399732
ENSG00000049883	763.976	PTCD2	pentatricopeptide repeat domain 2 [Source:HGNC Symbol;Acc:HGNC:25734]	0.172962	0.0569363	3.03781	0.00238304	0.0122732	0.0627451	0.0574516	1.09214	0.274773	0.441027
ENSG00000050030	52.1657	NEXMIF	neurite extension and migration factor [Source:HGNC Symbol;Acc:HGNC:29433]	0.06791	0.17338	0.391684	0.695292	0.825918	-0.0696747	0.176477	-0.394809	0.692984	0.812237
ENSG00000050130	1170.47	JKAMP	JNK1/MAPK8 associated membrane protein [Source:HGNC Symbol;Acc:HGNC:20184]	0.00178839	0.0420395	0.0425407	0.966068	0.983399	-0.188795	0.042817	-4.40933	1.03689e-05	5.02299e-05
ENSG00000050165	0.601751	DKK3	dickkopf WNT signaling pathway inhibitor 3 [Source:HGNC Symbol;Acc:HGNC:2893]	-1.50698	2.29617	-0.656301	0.51163	NA	-1.49057	2.29617	-0.649157	0.516237	NA
ENSG00000050327	393.047	ARHGEF5	Rho guanine nucleotide exchange factor 5 [Source:HGNC Symbol;Acc:HGNC:13209]	-0.0166204	0.0904802	-0.183691	0.854256	0.923269	-0.0695088	0.0908579	-0.765027	0.444255	0.613356
ENSG00000050344	185.814	NFE2L3	nuclear factor, erythroid 2 like 3 [Source:HGNC Symbol;Acc:HGNC:7783]	0.0841728	0.108088	0.778747	0.436129	0.627243	-0.364464	0.112555	-3.2381	0.00120328	0.00424139
ENSG00000050393	1472.87	MCUR1	mitochondrial calcium uniporter regulator 1 [Source:HGNC Symbol;Acc:HGNC:21097]	0.0506464	0.034521	1.46712	0.142344	0.297383	0.00918758	0.0347363	0.264495	0.791399	0.879601
ENSG00000050405	1473.33	LIMA1	LIM domain and actin binding 1 [Source:HGNC Symbol;Acc:HGNC:24636]	0.0565394	0.0450286	1.25563	0.209249	0.387583	0.316913	0.0443038	7.15318	8.47905e-13	8.38025e-12
ENSG00000050426	733.126	LETMD1	LETM1 domain containing 1 [Source:HGNC Symbol;Acc:HGNC:24241]	-0.0804424	0.0502521	-1.60078	0.109427	0.245263	0.00854308	0.0498742	0.171292	0.863994	0.923303
ENSG00000050438	3.97862	SLC4A8	solute carrier family 4 member 8 [Source:HGNC Symbol;Acc:HGNC:11034]	-0.113815	0.728394	-0.156255	0.875832	NA	0.525417	0.681556	0.770909	0.440761	0.610013
ENSG00000050555	11.568	LAMC3	laminin subunit gamma 3 [Source:HGNC Symbol;Acc:HGNC:6494]	0.392798	0.377574	1.04032	0.29819	NA	-0.839566	0.434645	-1.93161	0.0534072	0.122544
ENSG00000050628	4.83857	PTGER3	prostaglandin E receptor 3 [Source:HGNC Symbol;Acc:HGNC:9595]	-1.70315	0.82487	-2.06475	0.0389469	NA	0.085139	0.620642	0.137179	0.890889	0.940495
ENSG00000050730	0	TNIP3	TNFAIP3 interacting protein 3 [Source:HGNC Symbol;Acc:HGNC:19315]	NA	NA	NA	NA	NA	NA	NA	NA	NA	NA
ENSG00000050748	2075.17	MAPK9	mitogen-activated protein kinase 9 [Source:HGNC Symbol;Acc:HGNC:6886]	-0.00163541	0.0331215	-0.049376	0.96062	0.981039	0.28917	0.0323833	8.92962	4.27487e-19	6.63893e-18
ENSG00000050767	11.8331	COL23A1	collagen type XXIII alpha 1 chain [Source:HGNC Symbol;Acc:HGNC:22990]	-0.942473	0.430855	-2.18745	0.0287098	NA	-0.236889	0.400209	-0.591914	0.553908	0.708736
ENSG00000050820	1705.67	BCAR1	BCAR1 scaffold protein, Cas family member [Source:HGNC Symbol;Acc:HGNC:971]	0.0849915	0.0516107	1.64678	0.0996033	0.229468	0.0593772	0.0516988	1.14852	0.250753	0.412634
ENSG00000051009	532.401	FAM160A2	family with sequence similarity 160 member A2 [Source:HGNC Symbol;Acc:HGNC:25378]	-0.0343361	0.0611842	-0.561192	0.574666	0.742492	0.016849	0.060988	0.276267	0.782343	0.874232
ENSG00000051108	1840.24	HERPUD1	homocysteine inducible ER protein with ubiquitin like domain 1 [Source:HGNC Symbol;Acc:HGNC:13744]	-1.22595	0.0560724	-21.8637	5.75282e-106	1.5146e-102	-0.702458	0.0547689	-12.8258	1.17499e-37	4.59571e-36
ENSG00000051128	113.061	HOMER3	homer scaffold protein 3 [Source:HGNC Symbol;Acc:HGNC:17514]	-0.0211519	0.134635	-0.157105	0.875162	0.93542	-0.278507	0.13814	-2.01612	0.0437876	0.103821
ENSG00000051180	362.282	RAD51	RAD51 recombinase [Source:HGNC Symbol;Acc:HGNC:9817]	0.186403	0.070956	2.62703	0.00861342	0.0350393	0.500838	0.0691009	7.24792	4.23208e-13	4.28504e-12
ENSG00000051341	960.86	POLQ	DNA polymerase theta [Source:HGNC Symbol;Acc:HGNC:9186]	0.173593	0.0556777	3.11782	0.00182192	0.00982135	0.635789	0.0544461	11.6774	1.66303e-31	4.91944e-30
ENSG00000051382	2068.09	PIK3CB	phosphatidylinositol-4,5-bisphosphate 3-kinase catalytic subunit beta [Source:HGNC Symbol;Acc:HGNC:8976]	-0.0364704	0.037086	-0.9834	0.325411	0.520057	-0.220132	0.0376149	-5.85224	4.85006e-09	3.44038e-08
ENSG00000051523	0.185367	CYBA	cytochrome b-245 alpha chain [Source:HGNC Symbol;Acc:HGNC:2577]	0.22493	4.30858	0.0522051	0.958365	NA	1.55532	4.26771	0.364439	0.71553	NA
ENSG00000051596	801.535	THOC3	THO complex 3 [Source:HGNC Symbol;Acc:HGNC:19072]	-0.082873	0.0756703	-1.09519	0.273435	0.463078	0.0387051	0.0753603	0.5136	0.607532	0.753652
ENSG00000051620	2653.91	HEBP2	heme binding protein 2 [Source:HGNC Symbol;Acc:HGNC:15716]	-0.0947242	0.0350047	-2.70604	0.00680909	0.0290503	0.196783	0.0344957	5.70458	1.16632e-08	7.96183e-08
ENSG00000051825	1337.44	MPHOSPH9	M-phase phosphoprotein 9 [Source:HGNC Symbol;Acc:HGNC:7215]	0.10903	0.0484495	2.25038	0.0244246	0.0800882	0.423221	0.0477981	8.85435	8.41739e-19	1.28271e-17
ENSG00000052126	538.928	PLEKHA5	pleckstrin homology domain containing A5 [Source:HGNC Symbol;Acc:HGNC:30036]	0.0485666	0.0592084	0.820266	0.412065	0.605404	0.272415	0.0581036	4.68844	2.75291e-06	1.43672e-05
ENSG00000052344	677.684	PRSS8	serine protease 8 [Source:HGNC Symbol;Acc:HGNC:9491]	-0.0253481	0.0619714	-0.409029	0.682518	0.817904	-0.285284	0.0635008	-4.49261	7.03562e-06	3.48008e-05
ENSG00000052723	1406.52	SIKE1	suppressor of IKBKE 1 [Source:HGNC Symbol;Acc:HGNC:26119]	0.0293217	0.0476732	0.615056	0.538518	0.713686	0.193735	0.0472846	4.09721	4.18166e-05	0.000186843
ENSG00000052749	1816.21	RRP12	ribosomal RNA processing 12 homolog [Source:HGNC Symbol;Acc:HGNC:29100]	0.209992	0.0360534	5.82447	5.72949e-09	1.24051e-07	-0.193361	0.0371853	-5.19993	1.99358e-07	1.20076e-06
ENSG00000052795	771.643	FNIP2	folliculin interacting protein 2 [Source:HGNC Symbol;Acc:HGNC:29280]	0.0264231	0.0554893	0.476183	0.633944	0.783938	0.49623	0.0537187	9.23757	2.52157e-20	4.2302e-19
ENSG00000052802	1186.18	MSMO1	methylsterol monooxygenase 1 [Source:HGNC Symbol;Acc:HGNC:10545]	-0.137236	0.0446748	-3.07189	0.00212709	0.011178	-0.0690999	0.0444601	-1.5542	0.120136	0.237871
ENSG00000052841	1065.16	TTC17	tetratricopeptide repeat domain 17 [Source:HGNC Symbol;Acc:HGNC:25596]	0.0235011	0.0461719	0.508991	0.610758	0.767704	0.242528	0.0454363	5.33775	9.41055e-08	5.87701e-07
ENSG00000052850	83.2084	ALX4	ALX homeobox 4 [Source:HGNC Symbol;Acc:HGNC:450]	0.176968	0.153081	1.15604	0.247663	0.43368	-0.118986	0.158592	-0.750262	0.453097	0.620921
ENSG00000053108	5.44343	FSTL4	follistatin like 4 [Source:HGNC Symbol;Acc:HGNC:21389]	0.174664	0.599779	0.291214	0.770888	NA	-0.340934	0.628765	-0.542228	0.587661	0.737755
ENSG00000053254	1132.15	FOXN3	forkhead box N3 [Source:HGNC Symbol;Acc:HGNC:1928]	-0.119068	0.0487451	-2.44267	0.0145791	0.053544	0.331203	0.0470462	7.03995	1.92305e-12	1.84036e-11
ENSG00000053328	0.0549995	METTL24	methyltransferase like 24 [Source:HGNC Symbol;Acc:HGNC:21566]	-0.496372	5.94781	-0.0834547	0.93349	NA	-0.479968	5.94781	-0.0806966	0.935683	NA
ENSG00000053371	644.926	AKR7A2	aldo-keto reductase family 7 member A2 [Source:HGNC Symbol;Acc:HGNC:389]	-0.237373	0.0532756	-4.45557	8.36716e-06	9.18643e-05	-0.21974	0.0532702	-4.125	3.70731e-05	0.000166778
ENSG00000053372	990.882	MRTO4	MRT4 homolog, ribosome maturation factor [Source:HGNC Symbol;Acc:HGNC:18477]	0.226869	0.0442448	5.12758	2.93488e-07	4.4768e-06	0.209526	0.0443717	4.72206	2.33473e-06	1.22941e-05
ENSG00000053438	6.9402	NNAT	neuronatin [Source:HGNC Symbol;Acc:HGNC:7860]	-0.704267	0.470024	-1.49836	0.134039	NA	-0.577178	0.463216	-1.24602	0.212756	0.367245
ENSG00000053501	422.942	USE1	unconventional SNARE in the ER 1 [Source:HGNC Symbol;Acc:HGNC:30882]	0.0242887	0.0691458	0.351267	0.725388	0.847219	-0.204711	0.0707836	-2.89207	0.00382718	0.0122346
ENSG00000053524	17.1106	MCF2L2	MCF.2 cell line derived transforming sequence-like 2 [Source:HGNC Symbol;Acc:HGNC:30319]	-0.208666	0.310624	-0.671765	0.501733	NA	-1.3898	0.368248	-3.77409	0.000160595	0.000655446
ENSG00000053702	27.4657	NRIP2	nuclear receptor interacting protein 2 [Source:HGNC Symbol;Acc:HGNC:23078]	0.433272	0.250714	1.72815	0.0839606	0.203165	-0.0448002	0.263486	-0.170029	0.864988	0.924004
ENSG00000053747	4678.09	LAMA3	laminin subunit alpha 3 [Source:HGNC Symbol;Acc:HGNC:6483]	-0.231496	0.042752	-5.41487	6.13331e-08	1.07081e-06	0.0903104	0.0424886	2.12552	0.0335432	0.0828713
ENSG00000053770	938.659	AP5M1	adaptor related protein complex 5 subunit mu 1 [Source:HGNC Symbol;Acc:HGNC:20192]	0.0638452	0.0436239	1.46354	0.14332	0.298855	-0.0456091	0.0442141	-1.03155	0.302282	0.472115
ENSG00000053900	525.725	ANAPC4	anaphase promoting complex subunit 4 [Source:HGNC Symbol;Acc:HGNC:19990]	-0.0560735	0.0608408	-0.921643	0.356715	0.551732	-0.317112	0.0625863	-5.0668	4.04557e-07	2.3455e-06
ENSG00000053918	65.1	KCNQ1	potassium voltage-gated channel subfamily Q member 1 [Source:HGNC Symbol;Acc:HGNC:6294]	0.104485	0.180953	0.577415	0.563659	0.733856	-0.172968	0.186024	-0.929816	0.352466	0.525255
ENSG00000054116	1443.28	TRAPPC3	trafficking protein particle complex 3 [Source:HGNC Symbol;Acc:HGNC:19942]	0.0252378	0.0410465	0.614859	0.538648	0.713787	0.17553	0.0406288	4.32033	1.55798e-05	7.38798e-05
ENSG00000054118	5867.97	THRAP3	thyroid hormone receptor associated protein 3 [Source:HGNC Symbol;Acc:HGNC:22964]	-0.127931	0.0297899	-4.29443	1.75144e-05	0.00017749	0.427162	0.0292694	14.5942	3.05891e-48	1.92283e-46
ENSG00000054148	1625.55	PHPT1	phosphohistidine phosphatase 1 [Source:HGNC Symbol;Acc:HGNC:30033]	-0.184445	0.0631615	-2.92022	0.00349787	0.016799	-0.128205	0.0630815	-2.03237	0.0421165	0.100468
ENSG00000054179	190.028	ENTPD2	ectonucleoside triphosphate diphosphohydrolase 2 [Source:HGNC Symbol;Acc:HGNC:3364]	0.112799	0.092584	1.21835	0.223092	0.405186	-0.163371	0.0957238	-1.70669	0.0878803	0.184854
ENSG00000054219	0.317264	LY75	lymphocyte antigen 75 [Source:HGNC Symbol;Acc:HGNC:6729]	0.280539	3.01843	0.0929421	0.92595	NA	-1.06925	3.07984	-0.347175	0.72846	NA
ENSG00000054267	1058.62	ARID4B	AT-rich interaction domain 4B [Source:HGNC Symbol;Acc:HGNC:15550]	0.0888481	0.0488913	1.81726	0.0691777	0.175531	0.305196	0.0482209	6.32912	2.46566e-10	1.96592e-09
ENSG00000054277	1.80706	OPN3	opsin 3 [Source:HGNC Symbol;Acc:HGNC:14007]	-0.278254	0.925091	-0.300786	0.763578	NA	-0.0725872	0.905223	-0.0801871	0.936088	0.96501
ENSG00000054282	357.712	SDCCAG8	serologically defined colon cancer antigen 8 [Source:HGNC Symbol;Acc:HGNC:10671]	-0.00454758	0.0759095	-0.0599079	0.952229	0.977399	0.191777	0.0746273	2.56979	0.0101759	0.0292567
ENSG00000054356	1.13499	PTPRN	protein tyrosine phosphatase receptor type N [Source:HGNC Symbol;Acc:HGNC:9676]	-0.361623	1.14051	-0.317071	0.751189	NA	-0.935422	1.21487	-0.769977	0.441313	NA
ENSG00000054392	22.9324	HHAT	hedgehog acyltransferase [Source:HGNC Symbol;Acc:HGNC:18270]	0.392843	0.296193	1.32631	0.184738	NA	0.0233569	0.30758	0.0759376	0.939469	0.96722
ENSG00000054523	3246.8	KIF1B	kinesin family member 1B [Source:HGNC Symbol;Acc:HGNC:16636]	-0.0257191	0.0346826	-0.741558	0.458355	0.648418	-0.0669635	0.0347827	-1.92519	0.054205	0.123984
ENSG00000054598	30.1791	FOXC1	forkhead box C1 [Source:HGNC Symbol;Acc:HGNC:3800]	-0.0424145	0.266501	-0.159153	0.873548	0.934606	0.814729	0.248238	3.28204	0.00103058	0.00367932
ENSG00000054611	497.381	TBC1D22A	TBC1 domain family member 22A [Source:HGNC Symbol;Acc:HGNC:1309]	0.00856498	0.0673592	0.127154	0.898819	0.950365	-0.213667	0.0688141	-3.10498	0.00190289	0.006473
ENSG00000054654	1110.22	SYNE2	spectrin repeat containing nuclear envelope protein 2 [Source:HGNC Symbol;Acc:HGNC:17084]	-0.0368325	0.0621415	-0.59272	0.553368	0.726299	0.412062	0.0610324	6.75153	1.46294e-11	1.29663e-10
ENSG00000054690	1081.84	PLEKHH1	pleckstrin homology, MyTH4 and FERM domain containing H1 [Source:HGNC Symbol;Acc:HGNC:17733]	-0.0627733	0.0539288	-1.164	0.244423	0.430503	-0.18154	0.054415	-3.33622	0.000849268	0.00308097
ENSG00000054793	2330.81	ATP9A	ATPase phospholipid transporting 9A (putative) [Source:HGNC Symbol;Acc:HGNC:13540]	-0.0600318	0.0300622	-1.99692	0.0458336	0.129274	-0.328046	0.0309216	-10.609	2.70664e-26	6.1338e-25
ENSG00000054796	0	SPO11	SPO11 initiator of meiotic double stranded breaks [Source:HGNC Symbol;Acc:HGNC:11250]	NA	NA	NA	NA	NA	NA	NA	NA	NA	NA
ENSG00000054803	0	CBLN4	cerebellin 4 precursor [Source:HGNC Symbol;Acc:HGNC:16231]	NA	NA	NA	NA	NA	NA	NA	NA	NA	NA
ENSG00000054938	0.589168	CHRDL2	chordin like 2 [Source:HGNC Symbol;Acc:HGNC:24168]	1.51131	1.97278	0.76608	0.443629	NA	0.960046	2.05553	0.467056	0.64046	NA
ENSG00000054965	1319.78	FAM168A	family with sequence similarity 168 member A [Source:HGNC Symbol;Acc:HGNC:28999]	0.182939	0.0405234	4.51441	6.34935e-06	7.19921e-05	0.0296636	0.0411331	0.721161	0.470811	0.637633
ENSG00000054967	84.7488	RELT	RELT TNF receptor [Source:HGNC Symbol;Acc:HGNC:13764]	0.172006	0.136672	1.25853	0.208201	0.386076	-0.0031765	0.139393	-0.0227881	0.981819	0.989644
ENSG00000054983	3.54605	GALC	galactosylceramidase [Source:HGNC Symbol;Acc:HGNC:4115]	0.425701	0.822452	0.517599	0.604738	NA	-0.183375	0.87055	-0.210642	0.833166	0.903631
ENSG00000055044	2208.2	NOP58	NOP58 ribonucleoprotein [Source:HGNC Symbol;Acc:HGNC:29926]	0.19196	0.0409215	4.69092	2.71979e-06	3.39047e-05	0.203395	0.0409293	4.96941	6.71554e-07	3.78439e-06
ENSG00000055070	2179.37	SZRD1	SUZ RNA binding domain containing 1 [Source:HGNC Symbol;Acc:HGNC:30232]	0.0140384	0.035906	0.390978	0.695814	0.826314	0.395018	0.0350718	11.2631	1.99581e-29	5.28901e-28
ENSG00000055118	66.7813	KCNH2	potassium voltage-gated channel subfamily H member 2 [Source:HGNC Symbol;Acc:HGNC:6251]	0.301356	0.183279	1.64425	0.100125	0.230346	0.19451	0.185189	1.05034	0.293564	0.462588
ENSG00000055130	2047.32	CUL1	cullin 1 [Source:HGNC Symbol;Acc:HGNC:2551]	0.033352	0.0337891	0.987065	0.323611	0.518186	0.0489227	0.0337908	1.44781	0.14767	0.279625
ENSG00000055147	666.96	FAM114A2	family with sequence similarity 114 member A2 [Source:HGNC Symbol;Acc:HGNC:1333]	-0.131094	0.0551636	-2.37645	0.0174801	0.0616581	-0.267627	0.0559664	-4.78192	1.73628e-06	9.26061e-06
ENSG00000055163	1409.92	CYFIP2	cytoplasmic FMR1 interacting protein 2 [Source:HGNC Symbol;Acc:HGNC:13760]	-0.114358	0.0375466	-3.04577	0.00232088	0.0119953	-0.0966433	0.0375423	-2.57425	0.0100457	0.0289107
ENSG00000055208	1332.64	TAB2	TGF-beta activated kinase 1 (MAP3K7) binding protein 2 [Source:HGNC Symbol;Acc:HGNC:17075]	-0.0473853	0.050441	-0.93942	0.347515	0.542668	0.0637949	0.0501703	1.27157	0.203527	0.355988
ENSG00000055211	830.622	GINM1	glycoprotein integral membrane 1 [Source:HGNC Symbol;Acc:HGNC:21074]	-0.00832147	0.054453	-0.152819	0.878541	0.937285	0.0951953	0.0541015	1.75957	0.0784809	0.168989
ENSG00000055332	1078.66	EIF2AK2	eukaryotic translation initiation factor 2 alpha kinase 2 [Source:HGNC Symbol;Acc:HGNC:9437]	-0.0291399	0.051256	-0.568517	0.569684	0.738422	0.132075	0.0507899	2.60042	0.00931091	0.0270689
ENSG00000055483	1195.24	AC022966.1	ubiquitin specific peptidase 36 [Source:NCBI gene;Acc:57602]	0.182136	0.0443024	4.11119	3.93628e-05	0.000361599	-0.182821	0.0456091	-4.00844	6.11214e-05	0.000266834
ENSG00000055609	2187.56	KMT2C	lysine methyltransferase 2C [Source:HGNC Symbol;Acc:HGNC:13726]	0.0345657	0.0537395	0.64321	0.520088	0.699033	0.0795017	0.0536919	1.4807	0.138686	0.266193
ENSG00000055732	0.152648	MCOLN3	mucolipin 3 [Source:HGNC Symbol;Acc:HGNC:13358]	0.224934	4.54764	0.0494617	0.960551	NA	-0.480001	4.54764	-0.10555	0.91594	NA
ENSG00000055813	13.7686	CCDC85A	coiled-coil domain containing 85A [Source:HGNC Symbol;Acc:HGNC:29400]	0.082828	0.37731	0.219522	0.826243	NA	0.161308	0.374982	0.430176	0.667068	0.794694
ENSG00000055917	3042.34	PUM2	pumilio RNA binding family member 2 [Source:HGNC Symbol;Acc:HGNC:14958]	0.0152499	0.038216	0.399046	0.68986	0.82202	0.401584	0.0376527	10.6655	1.47641e-26	3.38213e-25
ENSG00000055950	723.275	MRPL43	mitochondrial ribosomal protein L43 [Source:HGNC Symbol;Acc:HGNC:14517]	0.0348413	0.0621661	0.560454	0.57517	0.742817	0.243154	0.0613846	3.96115	7.45889e-05	0.000320985
ENSG00000055955	0.93585	ITIH4	inter-alpha-trypsin inhibitor heavy chain 4 [Source:HGNC Symbol;Acc:HGNC:6169]	1.53326	1.61111	0.951676	0.341262	NA	1.24632	1.64147	0.759273	0.447689	NA
ENSG00000055957	0.0991818	ITIH1	inter-alpha-trypsin inhibitor heavy chain 1 [Source:HGNC Symbol;Acc:HGNC:6166]	-0.496385	5.94781	-0.0834568	0.933488	NA	-0.47998	5.94781	-0.0806987	0.935682	NA
ENSG00000056050	656.879	HPF1	histone PARylation factor 1 [Source:HGNC Symbol;Acc:HGNC:26051]	0.015527	0.0590962	0.262741	0.792751	0.889061	0.369044	0.0575757	6.40971	1.45797e-10	1.18074e-09
ENSG00000056097	2993.7	ZFR	zinc finger RNA binding protein [Source:HGNC Symbol;Acc:HGNC:17277]	0.153352	0.0375094	4.08836	4.34437e-05	0.000396597	0.542735	0.0369511	14.6879	7.7044e-49	4.99155e-47
ENSG00000056277	131.43	ZNF280C	zinc finger protein 280C [Source:HGNC Symbol;Acc:HGNC:25955]	0.335808	0.116722	2.87699	0.00401482	0.0188216	0.272641	0.117556	2.31925	0.0203816	0.053716
ENSG00000056291	0.212078	NPFFR2	neuropeptide FF receptor 2 [Source:HGNC Symbol;Acc:HGNC:4525]	0.17515	4.66426	0.0375516	0.970045	NA	0.206488	4.66587	0.0442549	0.964701	NA
ENSG00000056487	2.79282	PHF21B	PHD finger protein 21B [Source:HGNC Symbol;Acc:HGNC:25161]	1.62542	0.875564	1.85643	0.0633928	NA	0.658715	0.946089	0.696251	0.486272	0.651147
ENSG00000056558	2.16859	TRAF1	TNF receptor associated factor 1 [Source:HGNC Symbol;Acc:HGNC:12031]	-1.55617	1.07005	-1.4543	0.145863	NA	0.0365538	0.895609	0.0408145	0.967444	0.981666
ENSG00000056586	2421.79	RC3H2	ring finger and CCCH-type domains 2 [Source:HGNC Symbol;Acc:HGNC:21461]	-0.0733927	0.0468397	-1.56689	0.117141	0.257693	-0.19114	0.0470622	-4.06145	4.87697e-05	0.00021554
ENSG00000056736	234.409	IL17RB	interleukin 17 receptor B [Source:HGNC Symbol;Acc:HGNC:18015]	0.114615	0.0902506	1.26997	0.204097	0.38061	0.0209265	0.0911647	0.229546	0.818445	0.89576
ENSG00000056972	517.945	TRAF3IP2	TRAF3 interacting protein 2 [Source:HGNC Symbol;Acc:HGNC:1343]	0.129286	0.0632111	2.0453	0.0408254	0.118142	-0.0238477	0.0641543	-0.371723	0.710099	0.824111
ENSG00000056998	166.132	GYG2	glycogenin 2 [Source:HGNC Symbol;Acc:HGNC:4700]	-0.0536848	0.101463	-0.529106	0.596732	0.757072	-0.585165	0.108644	-5.38606	7.20183e-08	4.55965e-07
ENSG00000057019	115.523	DCBLD2	discoidin, CUB and LCCL domain containing 2 [Source:HGNC Symbol;Acc:HGNC:24627]	0.195583	0.136206	1.43594	0.151019	0.30966	0.321197	0.134948	2.38015	0.0173057	0.0465503
ENSG00000057149	0	SERPINB3	serpin family B member 3 [Source:HGNC Symbol;Acc:HGNC:10569]	NA	NA	NA	NA	NA	NA	NA	NA	NA	NA
ENSG00000057252	1278.89	SOAT1	sterol O-acyltransferase 1 [Source:HGNC Symbol;Acc:HGNC:11177]	-0.0711345	0.0490163	-1.45124	0.146713	0.303828	-0.0483803	0.0489984	-0.987386	0.323454	0.495335
ENSG00000057294	190.591	PKP2	plakophilin 2 [Source:HGNC Symbol;Acc:HGNC:9024]	0.249046	0.111348	2.23665	0.0253091	0.0822233	0.640204	0.108524	5.89921	3.65244e-09	2.62124e-08
ENSG00000057468	3.87612	MSH4	mutS homolog 4 [Source:HGNC Symbol;Acc:HGNC:7327]	0.489976	0.744859	0.65781	0.510661	NA	0.421861	0.749018	0.563219	0.573286	0.725574
ENSG00000057593	0.262617	F7	coagulation factor VII [Source:HGNC Symbol;Acc:HGNC:3544]	-1.78948	3.2084	-0.557747	0.577017	NA	-1.05173	3.2084	-0.327805	0.743059	NA
ENSG00000057608	7368.8	GDI2	GDP dissociation inhibitor 2 [Source:HGNC Symbol;Acc:HGNC:4227]	0.0654622	0.0241787	2.70743	0.00678068	0.0289714	0.110101	0.0241485	4.55933	5.13178e-06	2.58931e-05
ENSG00000057657	3.43506	PRDM1	PR/SET domain 1 [Source:HGNC Symbol;Acc:HGNC:9346]	1.37874	1.01244	1.36179	0.173263	NA	2.9985	0.94875	3.16047	0.00157515	0.00543253
ENSG00000057663	1037.53	ATG5	autophagy related 5 [Source:HGNC Symbol;Acc:HGNC:589]	0.00859156	0.0486916	0.176449	0.859942	0.927131	0.117425	0.0483461	2.42883	0.0151476	0.0414582
ENSG00000057704	15.6043	TMCC3	transmembrane and coiled-coil domain family 3 [Source:HGNC Symbol;Acc:HGNC:29199]	0.354261	0.328339	1.07895	0.280611	NA	0.278604	0.330775	0.842274	0.399634	0.57175
ENSG00000057757	838.651	PITHD1	PITH domain containing 1 [Source:HGNC Symbol;Acc:HGNC:25022]	0.059867	0.0487554	1.2279	0.219483	0.400454	0.277613	0.0479554	5.78898	7.08145e-09	4.93459e-08
ENSG00000057935	691.443	MTA3	metastasis associated 1 family member 3 [Source:HGNC Symbol;Acc:HGNC:23784]	0.090673	0.0521358	1.73917	0.0820052	0.199652	-0.0569364	0.0530256	-1.07375	0.282933	0.450497
ENSG00000058056	1110.75	USP13	ubiquitin specific peptidase 13 [Source:HGNC Symbol;Acc:HGNC:12611]	0.0369768	0.0467358	0.791189	0.428834	0.620416	-0.0575487	0.0470954	-1.22196	0.221723	0.378608
ENSG00000058063	4843.93	ATP11B	ATPase phospholipid transporting 11B (putative) [Source:HGNC Symbol;Acc:HGNC:13553]	-0.015915	0.0310303	-0.512886	0.608031	0.765725	0.147142	0.0308565	4.7686	1.85508e-06	9.86186e-06
ENSG00000058085	4.55881	LAMC2	laminin subunit gamma 2 [Source:HGNC Symbol;Acc:HGNC:6493]	-0.907965	0.586829	-1.54724	0.121806	NA	-0.520727	0.563801	-0.9236	0.355695	0.528699
ENSG00000058091	857.3	CDK14	cyclin dependent kinase 14 [Source:HGNC Symbol;Acc:HGNC:8883]	0.045406	0.0704664	0.644364	0.519339	0.698749	0.227817	0.0699717	3.25584	0.00113056	0.00400175
ENSG00000058262	11171.8	SEC61A1	SEC61 translocon alpha 1 subunit [Source:HGNC Symbol;Acc:HGNC:18276]	-0.108494	0.0187181	-5.79621	6.78319e-09	1.44958e-07	-0.194927	0.0188115	-10.3621	3.68587e-25	7.87151e-24
ENSG00000058272	2597.95	PPP1R12A	protein phosphatase 1 regulatory subunit 12A [Source:HGNC Symbol;Acc:HGNC:7618]	0.245611	0.0421247	5.83056	5.52419e-09	1.20001e-07	0.487444	0.0417764	11.6679	1.85879e-31	5.47554e-30
ENSG00000058335	3.82463	RASGRF1	Ras protein specific guanine nucleotide releasing factor 1 [Source:HGNC Symbol;Acc:HGNC:9875]	0.24526	0.723327	0.339073	0.734555	NA	0.347317	0.717443	0.484104	0.628312	0.768865
ENSG00000058404	214.026	CAMK2B	calcium/calmodulin dependent protein kinase II beta [Source:HGNC Symbol;Acc:HGNC:1461]	0.0419797	0.0914512	0.45904	0.646205	0.793309	-0.252729	0.0945441	-2.67313	0.00751461	0.0223733
ENSG00000058453	193.04	CROCC	ciliary rootlet coiled-coil, rootletin [Source:HGNC Symbol;Acc:HGNC:21299]	-0.0168905	0.105815	-0.159624	0.873178	0.934424	-0.416755	0.109766	-3.79677	0.000146593	0.000603312
ENSG00000058600	1172	POLR3E	RNA polymerase III subunit E [Source:HGNC Symbol;Acc:HGNC:30347]	0.0751205	0.0595331	1.26183	0.207011	0.384573	-0.141576	0.0601195	-2.35491	0.0185274	0.0494017
ENSG00000058668	1072.43	ATP2B4	ATPase plasma membrane Ca2+ transporting 4 [Source:HGNC Symbol;Acc:HGNC:817]	-0.0691314	0.0459192	-1.5055	0.132195	0.281679	-0.15839	0.0463426	-3.41781	0.000631269	0.00233544
ENSG00000058673	1.49068	ZC3H11A	zinc finger CCCH-type containing 11A [Source:HGNC Symbol;Acc:HGNC:29093]	2.00613	1.35829	1.47696	0.139688	NA	1.82085	1.37486	1.32438	0.185376	0.332202
ENSG00000058729	815.577	RIOK2	RIO kinase 2 [Source:HGNC Symbol;Acc:HGNC:18999]	0.571397	0.0487093	11.7308	8.86523e-32	1.79541e-29	0.585099	0.0487193	12.0096	3.16352e-33	1.02166e-31
ENSG00000058799	603.523	YIPF1	Yip1 domain family member 1 [Source:HGNC Symbol;Acc:HGNC:25231]	-0.101352	0.0530219	-1.9115	0.05594	0.149795	-0.630426	0.056424	-11.173	5.52677e-29	1.43052e-27
ENSG00000058804	1901.33	NDC1	NDC1 transmembrane nucleoporin [Source:HGNC Symbol;Acc:HGNC:25525]	0.0400405	0.051697	0.774523	0.438621	0.629183	0.0745654	0.0516637	1.44328	0.148941	0.2814
ENSG00000058866	0.405872	DGKG	diacylglycerol kinase gamma [Source:HGNC Symbol;Acc:HGNC:2853]	1.65746	2.59048	0.639827	0.522285	NA	0	2.59458	0	1	NA
ENSG00000059122	904.796	FLYWCH1	FLYWCH-type zinc finger 1 [Source:HGNC Symbol;Acc:HGNC:25404]	-0.230656	0.0566013	-4.07509	4.5996e-05	0.000415574	-0.310623	0.0570045	-5.44911	5.06229e-08	3.25779e-07
ENSG00000059145	1410.69	UNKL	unk like zinc finger [Source:HGNC Symbol;Acc:HGNC:14184]	-0.134659	0.0466741	-2.88508	0.00391312	0.0184566	-0.382858	0.0474329	-8.07158	6.9397e-16	8.67298e-15
ENSG00000059377	124.409	TBXAS1	thromboxane A synthase 1 [Source:HGNC Symbol;Acc:HGNC:11609]	-0.381951	0.128293	-2.97717	0.00290924	0.0144083	-0.603015	0.131454	-4.58728	4.49049e-06	2.29036e-05
ENSG00000059378	380.217	PARP12	poly(ADP-ribose) polymerase family member 12 [Source:HGNC Symbol;Acc:HGNC:21919]	0.0981119	0.0662177	1.48166	0.138432	0.290779	-0.297709	0.0693567	-4.29244	1.76721e-05	8.308e-05
ENSG00000059573	3718.62	ALDH18A1	aldehyde dehydrogenase 18 family member A1 [Source:HGNC Symbol;Acc:HGNC:9722]	0.0996824	0.0263824	3.77836	0.000157862	0.00122457	0.231784	0.026184	8.85215	8.58522e-19	1.30452e-17
ENSG00000059588	423.02	TARBP1	TAR (HIV-1) RNA binding protein 1 [Source:HGNC Symbol;Acc:HGNC:11568]	-0.152223	0.0745741	-2.04123	0.0412282	0.119019	-0.242525	0.0752338	-3.22361	0.00126585	0.00444487
ENSG00000059691	628.113	GATB	glutamyl-tRNA amidotransferase subunit B [Source:HGNC Symbol;Acc:HGNC:8849]	-0.121497	0.0625052	-1.94379	0.051921	0.141798	-0.079137	0.0623747	-1.26874	0.204535	0.35726
ENSG00000059728	243.331	MXD1	MAX dimerization protein 1 [Source:HGNC Symbol;Acc:HGNC:6761]	-0.213026	0.0879201	-2.42295	0.0153952	0.0557377	0.0993029	0.0853739	1.16315	0.244767	0.405724
ENSG00000059758	366.47	CDK17	cyclin dependent kinase 17 [Source:HGNC Symbol;Acc:HGNC:8750]	0.102606	0.0675991	1.51786	0.129051	0.277043	-0.172913	0.0698582	-2.47519	0.0133164	0.037022
ENSG00000059769	426.125	DNAJC25	DnaJ heat shock protein family (Hsp40) member C25 [Source:HGNC Symbol;Acc:HGNC:34187]	-0.0878965	0.0633651	-1.38714	0.165398	0.329246	-0.0439565	0.0631909	-0.695614	0.48667	0.651392
ENSG00000059804	6.32305	SLC2A3	solute carrier family 2 member 3 [Source:HGNC Symbol;Acc:HGNC:11007]	-0.264134	0.467469	-0.565029	0.572054	NA	0.970409	0.429435	2.25973	0.0238378	0.061731
ENSG00000059915	17.9092	PSD	pleckstrin and Sec7 domain containing [Source:HGNC Symbol;Acc:HGNC:9507]	0.0818587	0.329746	0.248248	0.803943	NA	-0.267676	0.34309	-0.780192	0.435278	0.605553
ENSG00000060069	611.804	CTDP1	CTD phosphatase subunit 1 [Source:HGNC Symbol;Acc:HGNC:2498]	0.00148107	0.0574708	0.0257708	0.97944	0.990425	0.016368	0.0574793	0.284763	0.775826	0.87031
ENSG00000060138	3971.3	YBX3	Y-box binding protein 3 [Source:HGNC Symbol;Acc:HGNC:2428]	0.027518	0.0388672	0.708001	0.478945	0.665769	0.0169513	0.038897	0.4358	0.662982	0.792328
ENSG00000060140	378.793	STYK1	serine/threonine/tyrosine kinase 1 [Source:HGNC Symbol;Acc:HGNC:18889]	0.07719	0.0753215	1.02481	0.305454	0.498821	0.0939531	0.075318	1.24742	0.212244	0.366661
ENSG00000060237	4929.18	WNK1	WNK lysine deficient protein kinase 1 [Source:HGNC Symbol;Acc:HGNC:14540]	0.0547734	0.0380284	1.44033	0.149775	0.308405	0.228671	0.0378858	6.0358	1.58178e-09	1.17101e-08
ENSG00000060303	0	RPS17P5	ribosomal protein S17 pseudogene 5 [Source:HGNC Symbol;Acc:HGNC:21352]	NA	NA	NA	NA	NA	NA	NA	NA	NA	NA
ENSG00000060339	4029.59	CCAR1	cell division cycle and apoptosis regulator 1 [Source:HGNC Symbol;Acc:HGNC:24236]	0.0341523	0.0349187	0.978051	0.328049	0.522814	0.250164	0.0346692	7.21574	5.36427e-13	5.37216e-12
ENSG00000060491	1223.54	OGFR	opioid growth factor receptor [Source:HGNC Symbol;Acc:HGNC:15768]	0.0507139	0.0521668	0.972148	0.330977	0.525254	-0.149197	0.0528375	-2.8237	0.00474728	0.0148853
ENSG00000060558	0.11398	GNA15	G protein subunit alpha 15 [Source:HGNC Symbol;Acc:HGNC:4383]	0	5.94781	0	1	NA	0	5.94781	0	1	NA
ENSG00000060566	0.0615862	CREB3L3	cAMP responsive element binding protein 3 like 3 [Source:HGNC Symbol;Acc:HGNC:18855]	0	5.94781	0	1	NA	0.962587	5.94781	0.161839	0.871433	NA
ENSG00000060642	564.186	PIGV	phosphatidylinositol glycan anchor biosynthesis class V [Source:HGNC Symbol;Acc:HGNC:26031]	-0.0701148	0.0559494	-1.25318	0.21014	0.388795	-0.0598158	0.0559887	-1.06835	0.285361	0.453165
ENSG00000060656	860.534	PTPRU	protein tyrosine phosphatase receptor type U [Source:HGNC Symbol;Acc:HGNC:9683]	-0.250775	0.0482197	-5.20066	1.98579e-07	3.1344e-06	-0.511866	0.0496724	-10.3048	6.70161e-25	1.41121e-23
ENSG00000060688	1475.12	SNRNP40	small nuclear ribonucleoprotein U5 subunit 40 [Source:HGNC Symbol;Acc:HGNC:30857]	0.167281	0.0382997	4.36769	1.25567e-05	0.000131815	0.592023	0.0371993	15.9149	4.99388e-57	4.39482e-55
ENSG00000060709	0.333457	RIMBP2	RIMS binding protein 2 [Source:HGNC Symbol;Acc:HGNC:30339]	-1.53687	4.51691	-0.340248	0.73367	NA	-2.24181	4.51691	-0.496314	0.619673	NA
ENSG00000060718	0.0602749	COL11A1	collagen type XI alpha 1 chain [Source:HGNC Symbol;Acc:HGNC:2186]	0	5.94781	0	1	NA	0	5.94781	0	1	NA
ENSG00000060749	800.813	QSER1	glutamine and serine rich 1 [Source:HGNC Symbol;Acc:HGNC:26154]	0.0905605	0.0714807	1.26692	0.205183	0.382257	0.274718	0.0709532	3.87182	0.000108024	0.000452423
ENSG00000060762	486.971	MPC1	mitochondrial pyruvate carrier 1 [Source:HGNC Symbol;Acc:HGNC:21606]	-0.11065	0.0730771	-1.51416	0.129985	0.278274	-0.154202	0.0734297	-2.1	0.0357286	0.0874318
ENSG00000060971	2196.09	ACAA1	acetyl-CoA acyltransferase 1 [Source:HGNC Symbol;Acc:HGNC:82]	-0.0648667	0.041559	-1.56084	0.118562	0.260169	0.111182	0.0412444	2.69569	0.00702424	0.0210858
ENSG00000060982	0.542388	BCAT1	branched chain amino acid transaminase 1 [Source:HGNC Symbol;Acc:HGNC:976]	-1.80725	2.07773	-0.869823	0.384397	NA	-1.79085	2.07773	-0.861927	0.388728	NA
ENSG00000061273	612.905	HDAC7	histone deacetylase 7 [Source:HGNC Symbol;Acc:HGNC:14067]	-0.148517	0.0600998	-2.47117	0.0134673	0.0501674	-0.472984	0.0621029	-7.61613	2.61402e-14	2.91657e-13
ENSG00000061337	12.7278	LZTS1	leucine zipper tumor suppressor 1 [Source:HGNC Symbol;Acc:HGNC:13861]	0.514497	0.341925	1.5047	0.1324	NA	0.265149	0.350357	0.756797	0.449171	0.61768
ENSG00000061455	1.03892	PRDM6	PR/SET domain 6 [Source:HGNC Symbol;Acc:HGNC:9350]	0.620966	1.40036	0.443433	0.657453	NA	0.968813	1.36145	0.711603	0.47671	NA
ENSG00000061492	0	WNT8A	Wnt family member 8A [Source:HGNC Symbol;Acc:HGNC:12788]	NA	NA	NA	NA	NA	NA	NA	NA	NA	NA
ENSG00000061656	20.3831	SPAG4	sperm associated antigen 4 [Source:HGNC Symbol;Acc:HGNC:11214]	0.0792886	0.283237	0.279937	0.779526	NA	-0.785256	0.312783	-2.51054	0.0120546	0.033979
ENSG00000061676	3469.06	NCKAP1	NCK associated protein 1 [Source:HGNC Symbol;Acc:HGNC:7666]	-0.0805577	0.0367914	-2.18958	0.0285545	0.0900986	0.0855847	0.0365708	2.34024	0.0192711	0.0511403
ENSG00000061794	3768.01	MRPS35	mitochondrial ribosomal protein S35 [Source:HGNC Symbol;Acc:HGNC:16635]	0.0430172	0.0284569	1.51166	0.13062	0.27909	0.330603	0.0280227	11.7977	4.01284e-32	1.2195e-30
ENSG00000061918	96.7698	GUCY1B1	guanylate cyclase 1 soluble subunit beta 1 [Source:HGNC Symbol;Acc:HGNC:4687]	-0.115424	0.135586	-0.851293	0.394607	0.590229	0.561087	0.126744	4.42693	9.55825e-06	4.65698e-05
ENSG00000061936	874.011	SFSWAP	splicing factor SWAP [Source:HGNC Symbol;Acc:HGNC:10790]	0.0612868	0.0520139	1.17828	0.238686	0.423801	0.242656	0.0513774	4.72301	2.32385e-06	1.22399e-05
ENSG00000061938	1198.71	TNK2	tyrosine kinase non receptor 2 [Source:HGNC Symbol;Acc:HGNC:19297]	-0.0879892	0.0523205	-1.68174	0.0926201	0.217297	0.198215	0.0515602	3.84434	0.000120876	0.000502366
ENSG00000061987	1626.01	MON2	MON2 homolog, regulator of endosome-to-Golgi trafficking [Source:HGNC Symbol;Acc:HGNC:29177]	-0.0463775	0.042383	-1.09425	0.273847	0.463499	0.00900861	0.0422802	0.213069	0.831273	0.902643
ENSG00000062038	8.7503	CDH3	cadherin 3 [Source:HGNC Symbol;Acc:HGNC:1762]	-0.461332	0.535465	-0.861555	0.388933	NA	-0.234194	0.522031	-0.448621	0.653705	0.785992
ENSG00000062096	0.131008	ARSF	arylsulfatase F [Source:HGNC Symbol;Acc:HGNC:721]	0	5.35598	0	1	NA	0.962588	5.35598	0.179722	0.857371	NA
ENSG00000062194	1624.12	GPBP1	GC-rich promoter binding protein 1 [Source:HGNC Symbol;Acc:HGNC:29520]	0.107127	0.0357548	2.99617	0.00273394	0.0137018	0.197841	0.0355264	5.56885	2.56424e-08	1.69619e-07
ENSG00000062282	856.681	DGAT2	diacylglycerol O-acyltransferase 2 [Source:HGNC Symbol;Acc:HGNC:16940]	0.0605219	0.0509792	1.18719	0.235154	0.41951	0.0717417	0.0510026	1.40663	0.159538	0.296645
ENSG00000062370	58.2113	ZNF112	zinc finger protein 112 [Source:HGNC Symbol;Acc:HGNC:12892]	-0.147274	0.18685	-0.788192	0.430584	0.622196	-0.00971605	0.184661	-0.0526155	0.958038	0.976438
ENSG00000062485	7826.99	CS	citrate synthase [Source:HGNC Symbol;Acc:HGNC:2422]	-0.0439377	0.02868	-1.532	0.125523	0.271283	-0.0314763	0.0286824	-1.09741	0.272463	0.438385
ENSG00000062524	0.464407	LTK	leukocyte receptor tyrosine kinase [Source:HGNC Symbol;Acc:HGNC:6721]	0.224928	2.37511	0.0947021	0.924551	NA	0.241332	2.37511	0.101609	0.919067	NA
ENSG00000062582	3.79907	MRPS24	mitochondrial ribosomal protein S24 [Source:HGNC Symbol;Acc:HGNC:14510]	-0.748996	0.728062	-1.02875	0.303596	NA	-0.317625	0.697766	-0.455203	0.648964	0.783555
ENSG00000062598	693.785	ELMO2	engulfment and cell motility 2 [Source:HGNC Symbol;Acc:HGNC:17233]	0.0802243	0.0621811	1.29017	0.196991	0.370774	0.144724	0.061991	2.33459	0.0195647	0.0518062
ENSG00000062650	1168.24	WAPL	WAPL cohesin release factor [Source:HGNC Symbol;Acc:HGNC:23293]	0.0608205	0.0467225	1.30174	0.193006	0.365537	0.0953078	0.0466622	2.04251	0.0411014	0.0984388
ENSG00000062716	3433.02	VMP1	vacuole membrane protein 1 [Source:HGNC Symbol;Acc:HGNC:29559]	-0.0319874	0.0296293	-1.07959	0.280326	0.470211	-0.0904254	0.0297608	-3.03841	0.00237833	0.00794947
ENSG00000062725	1985.54	APPBP2	amyloid beta precursor protein binding protein 2 [Source:HGNC Symbol;Acc:HGNC:622]	0.131386	0.046289	2.83838	0.00453429	0.0208413	0.437975	0.0457819	9.56655	1.1053e-21	2.00215e-20
ENSG00000062822	910.639	POLD1	DNA polymerase delta 1, catalytic subunit [Source:HGNC Symbol;Acc:HGNC:9175]	0.128198	0.0570348	2.24771	0.0245944	0.0804519	0.426243	0.0561452	7.59181	3.15479e-14	3.4996e-13
ENSG00000063015	3.68281	SEZ6	seizure related 6 homolog [Source:HGNC Symbol;Acc:HGNC:15955]	0.138963	0.724917	0.191695	0.847981	NA	-0.929102	0.81444	-1.14079	0.253959	0.416611
ENSG00000063046	11502.7	EIF4B	eukaryotic translation initiation factor 4B [Source:HGNC Symbol;Acc:HGNC:3285]	-0.13871	0.0215636	-6.43261	1.25433e-10	3.8134e-09	0.12665	0.0213683	5.92703	3.08463e-09	2.22813e-08
ENSG00000063127	3.55261	SLC6A16	solute carrier family 6 member 16 [Source:HGNC Symbol;Acc:HGNC:13622]	0.620471	0.804469	0.77128	0.440541	NA	-0.492579	0.913924	-0.538972	0.589906	0.739652
ENSG00000063169	308.987	BICRA	BRD4 interacting chromatin remodeling complex associated protein [Source:HGNC Symbol;Acc:HGNC:4332]	-0.120178	0.0783442	-1.53397	0.125037	0.270454	0.0689366	0.0769394	0.895986	0.37026	0.543603
ENSG00000063176	538.502	SPHK2	sphingosine kinase 2 [Source:HGNC Symbol;Acc:HGNC:18859]	0.0635785	0.0643829	0.987507	0.323394	0.518029	-0.0333116	0.0650329	-0.512228	0.608491	0.754231
ENSG00000063177	9109.48	RPL18	ribosomal protein L18 [Source:HGNC Symbol;Acc:HGNC:10310]	-0.0982727	0.0406344	-2.41846	0.0155863	0.0562438	-0.0420503	0.0406127	-1.0354	0.300484	0.470036
ENSG00000063180	30.5101	CA11	carbonic anhydrase 11 [Source:HGNC Symbol;Acc:HGNC:1370]	-0.388765	0.255181	-1.52349	0.127637	0.274904	-0.298579	0.253063	-1.17986	0.238057	0.397744
ENSG00000063241	1698.82	ISOC2	isochorismatase domain containing 2 [Source:HGNC Symbol;Acc:HGNC:26278]	0.0489662	0.0439919	1.11307	0.265677	0.454558	-0.150714	0.0445207	-3.38525	0.000711135	0.00260898
ENSG00000063244	7536.69	U2AF2	U2 small nuclear RNA auxiliary factor 2 [Source:HGNC Symbol;Acc:HGNC:23156]	0.095309	0.0364228	2.61674	0.00887731	0.0358909	0.306938	0.0362999	8.45561	2.77628e-17	3.82753e-16
ENSG00000063245	4388.42	EPN1	epsin 1 [Source:HGNC Symbol;Acc:HGNC:21604]	0.0629037	0.0440007	1.42961	0.152829	0.312253	0.395522	0.043732	9.04424	1.5071e-19	2.41331e-18
ENSG00000063322	2419.24	MED29	mediator complex subunit 29 [Source:HGNC Symbol;Acc:HGNC:23074]	0.10641	0.0364356	2.92051	0.00349463	0.0167895	-0.0168796	0.0367288	-0.459573	0.645823	0.781417
ENSG00000063438	1.03654	AHRR	aryl-hydrocarbon receptor repressor [Source:HGNC Symbol;Acc:HGNC:346]	1.53963	1.54137	0.998868	0.317859	NA	2.77029	1.40842	1.96695	0.0491892	NA
ENSG00000063515	0.0982272	GSC2	goosecoid homeobox 2 [Source:HGNC Symbol;Acc:HGNC:4613]	0	5.94781	0	1	NA	0.962574	5.94781	0.161837	0.871434	NA
ENSG00000063587	729.943	ZNF275	zinc finger protein 275 [Source:HGNC Symbol;Acc:HGNC:13069]	-0.128041	0.0541393	-2.36502	0.0180289	0.0631371	-0.271973	0.0549118	-4.95291	7.31119e-07	4.10145e-06
ENSG00000063601	1179.82	MTMR1	myotubularin related protein 1 [Source:HGNC Symbol;Acc:HGNC:7449]	-0.0435953	0.0401771	-1.08508	0.277887	0.467558	0.00215414	0.0400619	0.0537704	0.957118	0.976018
ENSG00000063660	403.081	GPC1	glypican 1 [Source:HGNC Symbol;Acc:HGNC:4449]	0.0791305	0.0797678	0.99201	0.321193	0.515821	-0.0325516	0.0805258	-0.404239	0.686037	0.80738
ENSG00000063761	265.849	ADCK1	aarF domain containing kinase 1 [Source:HGNC Symbol;Acc:HGNC:19038]	0.0749036	0.0808998	0.925881	0.354508	0.549869	-0.331057	0.0847894	-3.90447	9.44327e-05	0.000399222
ENSG00000063854	1261.2	HAGH	hydroxyacylglutathione hydrolase [Source:HGNC Symbol;Acc:HGNC:4805]	-0.118808	0.049548	-2.39784	0.0164921	0.0589311	-0.143323	0.0496773	-2.88509	0.00391308	0.0124827
ENSG00000063978	2128.93	RNF4	ring finger protein 4 [Source:HGNC Symbol;Acc:HGNC:10067]	0.0347918	0.0326375	1.06601	0.28642	0.476967	0.0477633	0.0326456	1.46308	0.143444	0.273256
ENSG00000064012	548.495	CASP8	caspase 8 [Source:HGNC Symbol;Acc:HGNC:1509]	0.0676946	0.0751238	0.901107	0.367531	0.562717	0.0145277	0.0754414	0.192569	0.847296	0.912676
ENSG00000064042	20951.4	LIMCH1	LIM and calponin homology domains 1 [Source:HGNC Symbol;Acc:HGNC:29191]	-0.0689914	0.0283801	-2.43098	0.0150582	0.0548041	0.0508937	0.0283498	1.79521	0.0726207	0.158305
ENSG00000064102	806.398	INTS13	integrator complex subunit 13 [Source:HGNC Symbol;Acc:HGNC:20174]	0.0476042	0.048698	0.977539	0.328302	0.522999	-0.0223232	0.0491053	-0.454598	0.649398	0.783617
ENSG00000064115	1299.5	TM7SF3	transmembrane 7 superfamily member 3 [Source:HGNC Symbol;Acc:HGNC:23049]	-0.0529574	0.0431027	-1.22863	0.21921	0.400066	0.263901	0.0421096	6.26702	3.68025e-10	2.88533e-09
ENSG00000064195	99.7808	DLX3	distal-less homeobox 3 [Source:HGNC Symbol;Acc:HGNC:2916]	0.22939	0.172331	1.3311	0.183155	0.353112	-0.583268	0.187732	-3.10692	0.00189049	0.00643292
ENSG00000064199	85.0705	SPA17	sperm autoantigenic protein 17 [Source:HGNC Symbol;Acc:HGNC:11210]	-0.0588849	0.148475	-0.396598	0.691664	0.823168	0.228964	0.144642	1.58297	0.113428	0.227146
ENSG00000064201	3.77339	TSPAN32	tetraspanin 32 [Source:HGNC Symbol;Acc:HGNC:13410]	0.0127961	0.724284	0.0176672	0.985904	NA	0.427286	0.696976	0.613057	0.539838	0.696301
ENSG00000064205	0.282655	CCN5	cellular communication network factor 5 [Source:HGNC Symbol;Acc:HGNC:12770]	-0.496411	2.68184	-0.185101	0.85315	NA	0.241338	2.68184	0.0899898	0.928295	NA
ENSG00000064218	0.0620502	DMRT3	doublesex and mab-3 related transcription factor 3 [Source:HGNC Symbol;Acc:HGNC:13909]	0	5.94781	0	1	NA	0	5.94781	0	1	NA
ENSG00000064225	2.37708	ST3GAL6	ST3 beta-galactoside alpha-2,3-sialyltransferase 6 [Source:HGNC Symbol;Acc:HGNC:18080]	0.0104396	0.771046	0.0135395	0.989197	NA	-0.0865039	0.779509	-0.110972	0.911638	0.952006
ENSG00000064270	523.194	ATP2C2	ATPase secretory pathway Ca2+ transporting 2 [Source:HGNC Symbol;Acc:HGNC:29103]	-0.339328	0.0695112	-4.88163	1.05212e-06	1.44272e-05	-1.1244	0.0749772	-14.9966	7.725e-51	5.54965e-49
ENSG00000064300	7.25356	NGFR	nerve growth factor receptor [Source:HGNC Symbol;Acc:HGNC:7809]	0.585552	0.453943	1.28992	0.197077	NA	-1.08082	0.555407	-1.946	0.0516547	0.119196
ENSG00000064309	140.519	CDON	cell adhesion associated, oncogene regulated [Source:HGNC Symbol;Acc:HGNC:17104]	-0.0110328	0.116676	-0.0945596	0.924665	0.964141	-0.140775	0.118425	-1.18873	0.234545	0.393943
ENSG00000064313	843.565	TAF2	TATA-box binding protein associated factor 2 [Source:HGNC Symbol;Acc:HGNC:11536]	0.0755799	0.0523744	1.44307	0.149001	0.307112	0.161142	0.0520997	3.09295	0.00198179	0.00671976
ENSG00000064393	3229.79	HIPK2	homeodomain interacting protein kinase 2 [Source:HGNC Symbol;Acc:HGNC:14402]	-0.0431533	0.0808496	-0.533748	0.593516	0.754738	-0.061391	0.0808706	-0.759126	0.447777	0.616445
ENSG00000064419	2244.76	TNPO3	transportin 3 [Source:HGNC Symbol;Acc:HGNC:17103]	0.159529	0.0358942	4.44443	8.8127e-06	9.65145e-05	0.108228	0.036039	3.00307	0.00267269	0.00883409
ENSG00000064489	0	BORCS8-MEF2B	BORCS8-MEF2B readthrough [Source:HGNC Symbol;Acc:HGNC:39979]	NA	NA	NA	NA	NA	NA	NA	NA	NA	NA
ENSG00000064490	632.4	RFXANK	regulatory factor X associated ankyrin containing protein [Source:HGNC Symbol;Acc:HGNC:9987]	0.0801468	0.0606511	1.32144	0.186355	0.357293	0.0969785	0.0606483	1.59903	0.109814	0.221462
ENSG00000064545	940.595	TMEM161A	transmembrane protein 161A [Source:HGNC Symbol;Acc:HGNC:26020]	-0.106699	0.0476423	-2.23959	0.0251174	0.0817214	-0.100109	0.047685	-2.09938	0.0357834	0.0875354
ENSG00000064547	269.033	LPAR2	lysophosphatidic acid receptor 2 [Source:HGNC Symbol;Acc:HGNC:3168]	0.145691	0.0912762	1.59616	0.110453	0.246734	-0.302999	0.0950797	-3.18679	0.0014386	0.00500242
ENSG00000064601	404.324	CTSA	cathepsin A [Source:HGNC Symbol;Acc:HGNC:9251]	-0.00154037	0.0719092	-0.021421	0.98291	0.991758	0.046955	0.0716921	0.654953	0.512498	0.673625
ENSG00000064607	3007.21	SUGP2	SURP and G-patch domain containing 2 [Source:HGNC Symbol;Acc:HGNC:18641]	0.0914659	0.0272439	3.35729	0.000787099	0.00490131	0.29459	0.0268315	10.9793	4.80711e-28	1.1875e-26
ENSG00000064651	1310.81	SLC12A2	solute carrier family 12 member 2 [Source:HGNC Symbol;Acc:HGNC:10911]	0.163721	0.0443668	3.69017	0.000224105	0.00166485	0.548221	0.0432707	12.6696	8.71854e-37	3.28243e-35
ENSG00000064652	82.6829	SNX24	sorting nexin 24 [Source:HGNC Symbol;Acc:HGNC:21533]	-0.406096	0.155127	-2.61782	0.00884926	0.0358216	-0.59888	0.158939	-3.768	0.000164562	0.000670081
ENSG00000064655	35.5753	EYA2	EYA transcriptional coactivator and phosphatase 2 [Source:HGNC Symbol;Acc:HGNC:3520]	-0.144749	0.216099	-0.669829	0.502967	0.685551	-1.15185	0.253631	-4.54143	5.58736e-06	2.80377e-05
ENSG00000064666	930.221	CNN2	calponin 2 [Source:HGNC Symbol;Acc:HGNC:2156]	0.226986	0.0498915	4.5496	5.37487e-06	6.21201e-05	0.693701	0.0483082	14.3599	9.23473e-47	5.5254e-45
ENSG00000064687	918.996	ABCA7	ATP binding cassette subfamily A member 7 [Source:HGNC Symbol;Acc:HGNC:37]	-0.0475498	0.0536364	-0.88652	0.375338	0.570811	0.104328	0.0531105	1.96435	0.0494895	0.115016
ENSG00000064692	2.00319	SNCAIP	synuclein alpha interacting protein [Source:HGNC Symbol;Acc:HGNC:11139]	-1.78108	1.10849	-1.60676	0.108108	NA	-3.0652	1.25434	-2.44368	0.0145381	0.039987
ENSG00000064703	359.593	DDX20	DEAD-box helicase 20 [Source:HGNC Symbol;Acc:HGNC:2743]	0.25823	0.0806459	3.20202	0.00136469	0.00770357	0.0562785	0.0819171	0.687017	0.492072	0.656489
ENSG00000064726	2238.21	BTBD1	BTB domain containing 1 [Source:HGNC Symbol;Acc:HGNC:1120]	-0.0481709	0.0322992	-1.4914	0.135858	0.287575	-0.114857	0.0325186	-3.53204	0.000412362	0.00157325
ENSG00000064763	32.4238	FAR2	fatty acyl-CoA reductase 2 [Source:HGNC Symbol;Acc:HGNC:25531]	0.0961317	0.235199	0.408726	0.682741	0.818096	-0.349471	0.246683	-1.41668	0.156577	0.292273
ENSG00000064787	77.9416	BCAS1	breast carcinoma amplified sequence 1 [Source:HGNC Symbol;Acc:HGNC:974]	0.0438815	0.154797	0.283477	0.776811	0.878954	-0.541472	0.166672	-3.24873	0.0011592	0.00409559
ENSG00000064835	0.100273	POU1F1	POU class 1 homeobox 1 [Source:HGNC Symbol;Acc:HGNC:9210]	0.94617	5.94781	0.159079	0.873607	NA	0	5.94781	0	1	NA
ENSG00000064886	0.659494	CHI3L2	chitinase 3 like 2 [Source:HGNC Symbol;Acc:HGNC:1933]	2.22123	1.86311	1.19222	0.233176	NA	0.241331	2.02029	0.119454	0.904916	NA
ENSG00000064932	3465.79	SBNO2	strawberry notch homolog 2 [Source:HGNC Symbol;Acc:HGNC:29158]	0.0685077	0.0412258	1.66177	0.0965591	0.224299	-0.0850687	0.0414497	-2.05234	0.0401371	0.096531
ENSG00000064933	491.41	PMS1	PMS1 homolog 1, mismatch repair system component [Source:HGNC Symbol;Acc:HGNC:9121]	0.25622	0.0586743	4.36681	1.26074e-05	0.000132242	0.613428	0.0567996	10.7999	3.44702e-27	8.14368e-26
ENSG00000064961	2832.97	HMG20B	high mobility group 20B [Source:HGNC Symbol;Acc:HGNC:5002]	-0.112484	0.0376262	-2.98952	0.00279419	0.013954	-0.681518	0.0387858	-17.5713	4.08541e-69	5.32642e-67
ENSG00000064989	25.4	CALCRL	calcitonin receptor like receptor [Source:HGNC Symbol;Acc:HGNC:16709]	-0.728482	0.26654	-2.73311	0.00627403	0.0271714	-0.0680741	0.247576	-0.274963	0.783345	0.874704
ENSG00000064995	623.985	TAF11	TATA-box binding protein associated factor 11 [Source:HGNC Symbol;Acc:HGNC:11544]	0.119266	0.0544829	2.18906	0.0285927	0.0901815	-0.107824	0.0558168	-1.93175	0.0533905	0.122544
ENSG00000064999	982.842	ANKS1A	ankyrin repeat and sterile alpha motif domain containing 1A [Source:HGNC Symbol;Acc:HGNC:20961]	0.155797	0.0494313	3.15179	0.00162272	0.00890806	0.02104	0.050003	0.420774	0.67392	0.799166
ENSG00000065000	5320.15	AP3D1	adaptor related protein complex 3 subunit delta 1 [Source:HGNC Symbol;Acc:HGNC:568]	-0.0769668	0.0295027	-2.6088	0.00908593	0.0365087	-0.255908	0.0297513	-8.60159	7.86218e-18	1.12505e-16
ENSG00000065029	876.491	ZNF76	zinc finger protein 76 [Source:HGNC Symbol;Acc:HGNC:13149]	0.0801263	0.0486794	1.646	0.099764	0.229798	-0.0385193	0.0492576	-0.781997	0.434216	0.604514
ENSG00000065054	1635.26	SLC9A3R2	SLC9A3 regulator 2 [Source:HGNC Symbol;Acc:HGNC:11076]	0.0552292	0.054896	1.00607	0.314382	0.508231	-0.465061	0.0560432	-8.29826	1.05651e-16	1.39903e-15
ENSG00000065057	328.792	NTHL1	nth like DNA glycosylase 1 [Source:HGNC Symbol;Acc:HGNC:8028]	0.0841538	0.0747391	1.12597	0.260179	0.448475	0.189695	0.0741148	2.55947	0.0104831	0.0300344
ENSG00000065060	2011.58	UHRF1BP1	UHRF1 binding protein 1 [Source:HGNC Symbol;Acc:HGNC:21216]	-0.308815	0.04744	-6.50959	7.53539e-11	2.34505e-09	-0.474884	0.0478286	-9.92887	3.11769e-23	6.08021e-22
ENSG00000065135	2485.2	GNAI3	G protein subunit alpha i3 [Source:HGNC Symbol;Acc:HGNC:4387]	0.114188	0.0408207	2.7973	0.00515311	0.0231691	0.28755	0.0405546	7.09045	1.33679e-12	1.30052e-11
ENSG00000065150	4502.42	IPO5	importin 5 [Source:HGNC Symbol;Acc:HGNC:6402]	0.0159716	0.0285509	0.559407	0.575884	0.743007	0.274738	0.0282243	9.73409	2.15743e-22	4.04322e-21
ENSG00000065154	189.681	OAT	ornithine aminotransferase [Source:HGNC Symbol;Acc:HGNC:8091]	-0.171446	0.0916977	-1.86969	0.0615272	0.160322	-0.741408	0.098386	-7.53571	4.85676e-14	5.30128e-13
ENSG00000065183	2004.02	WDR3	WD repeat domain 3 [Source:HGNC Symbol;Acc:HGNC:12755]	0.190176	0.0378635	5.02269	5.09537e-07	7.37093e-06	-0.152015	0.0387097	-3.92705	8.59939e-05	0.000366776
ENSG00000065243	1651.34	PKN2	protein kinase N2 [Source:HGNC Symbol;Acc:HGNC:9406]	0.0667016	0.0427469	1.56038	0.118669	0.260203	0.191205	0.04246	4.50318	6.69454e-06	3.32148e-05
ENSG00000065268	1081.77	WDR18	WD repeat domain 18 [Source:HGNC Symbol;Acc:HGNC:17956]	-0.139272	0.0596392	-2.33524	0.0195309	0.0672472	-0.0221675	0.0593384	-0.373578	0.708718	0.823001
ENSG00000065308	343.979	TRAM2	translocation associated membrane protein 2 [Source:HGNC Symbol;Acc:HGNC:16855]	0.0858501	0.069547	1.23442	0.217047	0.397512	-0.10991	0.0711037	-1.54577	0.12216	0.241
ENSG00000065320	5.27636	NTN1	netrin 1 [Source:HGNC Symbol;Acc:HGNC:8029]	-0.178089	0.568754	-0.313121	0.754189	NA	-0.934841	0.614471	-1.52138	0.128165	0.250124
ENSG00000065325	5.43849	GLP2R	glucagon like peptide 2 receptor [Source:HGNC Symbol;Acc:HGNC:4325]	-0.787391	0.575533	-1.36811	0.171278	NA	-1.30186	0.614051	-2.12012	0.033996	0.0837743
ENSG00000065328	990.718	MCM10	minichromosome maintenance 10 replication initiation factor [Source:HGNC Symbol;Acc:HGNC:18043]	0.453289	0.059645	7.59978	2.96634e-14	1.47354e-12	0.594383	0.0593368	10.0171	1.28191e-23	2.54526e-22
ENSG00000065357	57.3867	DGKA	diacylglycerol kinase alpha [Source:HGNC Symbol;Acc:HGNC:2849]	-0.139203	0.182298	-0.763599	0.445106	0.635645	-0.206167	0.183857	-1.12135	0.262141	0.426488
ENSG00000065361	3605.87	ERBB3	erb-b2 receptor tyrosine kinase 3 [Source:HGNC Symbol;Acc:HGNC:3431]	-0.201795	0.0305334	-6.60901	3.86897e-11	1.24831e-09	-0.482635	0.031116	-15.5108	2.9316e-54	2.37235e-52
ENSG00000065371	0.21798	ROPN1	rhophilin associated tail protein 1 [Source:HGNC Symbol;Acc:HGNC:17692]	0	4.13236	0	1	NA	0.962615	4.13236	0.232946	0.815804	NA
ENSG00000065413	215.124	ANKRD44	ankyrin repeat domain 44 [Source:HGNC Symbol;Acc:HGNC:25259]	0.182923	0.0982054	1.86266	0.06251	0.162529	0.445669	0.0961353	4.63585	3.55477e-06	1.83391e-05
ENSG00000065427	5371.23	KARS1	lysyl-tRNA synthetase 1 [Source:HGNC Symbol;Acc:HGNC:6215]	0.0231725	0.020777	1.1153	0.264724	0.453333	0.245231	0.0204416	11.9967	3.6994e-33	1.18746e-31
ENSG00000065457	875.357	ADAT1	adenosine deaminase tRNA specific 1 [Source:HGNC Symbol;Acc:HGNC:228]	0.0472871	0.0506533	0.933543	0.350539	0.545362	-0.175924	0.0516395	-3.40677	0.000657356	0.00242581
ENSG00000065485	877.95	PDIA5	protein disulfide isomerase family A member 5 [Source:HGNC Symbol;Acc:HGNC:24811]	-0.15502	0.0518009	-2.99261	0.002766	0.0138395	-0.297502	0.0524331	-5.67394	1.39554e-08	9.44716e-08
ENSG00000065491	244.866	TBC1D22B	TBC1 domain family member 22B [Source:HGNC Symbol;Acc:HGNC:21602]	0.147522	0.0954285	1.54589	0.122132	0.265918	0.719844	0.0915372	7.86395	3.72204e-15	4.41647e-14
ENSG00000065518	6731.67	NDUFB4	NADH:ubiquinone oxidoreductase subunit B4 [Source:HGNC Symbol;Acc:HGNC:7699]	-0.0054376	0.0355438	-0.152983	0.878412	0.937285	0.316489	0.0352824	8.97016	2.96077e-19	4.6494e-18
ENSG00000065526	1324.29	SPEN	spen family transcriptional repressor [Source:HGNC Symbol;Acc:HGNC:17575]	0.198392	0.0602191	3.2945	0.000985986	0.00591097	0.284112	0.0600726	4.72947	2.25104e-06	1.18712e-05
ENSG00000065534	127.628	MYLK	myosin light chain kinase [Source:HGNC Symbol;Acc:HGNC:7590]	-0.0698603	0.135838	-0.514292	0.607048	0.764809	0.269755	0.131262	2.05508	0.0398712	0.0960341
ENSG00000065548	2061.56	ZC3H15	zinc finger CCCH-type containing 15 [Source:HGNC Symbol;Acc:HGNC:29528]	0.135473	0.0338903	3.9974	6.40418e-05	0.000556099	0.0931626	0.0340355	2.73722	0.00619606	0.0188678
ENSG00000065559	1785.74	MAP2K4	mitogen-activated protein kinase kinase 4 [Source:HGNC Symbol;Acc:HGNC:6844]	0.056187	0.0394427	1.42452	0.154296	0.31437	0.134752	0.0392828	3.43032	0.000602876	0.00224021
ENSG00000065600	311.336	PACC1	proton activated chloride channel 1 [Source:HGNC Symbol;Acc:HGNC:25593]	0.363428	0.0720978	5.04076	4.63685e-07	6.75216e-06	0.0848151	0.0742655	1.14205	0.253433	0.416006
ENSG00000065609	19.207	SNAP91	synaptosome associated protein 91 [Source:HGNC Symbol;Acc:HGNC:14986]	-0.142456	0.349182	-0.407971	0.683295	NA	0.474509	0.329423	1.44043	0.149747	0.282486
ENSG00000065613	1822.54	SLK	STE20 like kinase [Source:HGNC Symbol;Acc:HGNC:11088]	0.0974512	0.0382313	2.54899	0.0108035	0.0420263	0.218394	0.0379723	5.75139	8.85142e-09	6.1155e-08
ENSG00000065615	330.743	CYB5R4	cytochrome b5 reductase 4 [Source:HGNC Symbol;Acc:HGNC:20147]	-0.050066	0.0768181	-0.651748	0.514564	0.695291	-0.101019	0.0773018	-1.30682	0.191275	0.339775
ENSG00000065618	2.61099	COL17A1	collagen type XVII alpha 1 chain [Source:HGNC Symbol;Acc:HGNC:2194]	0.0305971	0.912705	0.0335235	0.973257	NA	0.24155	0.891998	0.270796	0.786548	0.876707
ENSG00000065621	42.2287	GSTO2	glutathione S-transferase omega 2 [Source:HGNC Symbol;Acc:HGNC:23064]	-0.30198	0.207562	-1.45489	0.145698	0.302141	-0.395463	0.210255	-1.88087	0.0599889	0.135034
ENSG00000065665	211.326	SEC61A2	SEC61 translocon alpha 2 subunit [Source:HGNC Symbol;Acc:HGNC:17702]	-0.00538821	0.0977871	-0.0551014	0.956058	0.979343	0.484879	0.093694	5.17514	2.27744e-07	1.36304e-06
ENSG00000065675	0	PRKCQ	protein kinase C theta [Source:HGNC Symbol;Acc:HGNC:9410]	NA	NA	NA	NA	NA	NA	NA	NA	NA	NA
ENSG00000065717	241.165	TLE2	TLE family member 2, transcriptional corepressor [Source:HGNC Symbol;Acc:HGNC:11838]	-0.0891454	0.119188	-0.747941	0.454496	0.64444	-0.466216	0.122136	-3.81718	0.000134987	0.000558483
ENSG00000065802	805.293	ASB1	ankyrin repeat and SOCS box containing 1 [Source:HGNC Symbol;Acc:HGNC:16011]	-0.123479	0.0478778	-2.57904	0.00990743	0.0390511	-0.162303	0.0481552	-3.37041	0.000750562	0.00274647
ENSG00000065809	757.398	FAM107B	family with sequence similarity 107 member B [Source:HGNC Symbol;Acc:HGNC:23726]	-0.0154732	0.0498401	-0.310458	0.756213	0.86586	-0.0324436	0.0499812	-0.649116	0.516263	0.676679
ENSG00000065833	4312.23	ME1	malic enzyme 1 [Source:HGNC Symbol;Acc:HGNC:6983]	-0.124939	0.0318757	-3.91957	8.8706e-05	0.000737666	-0.285444	0.0321368	-8.88216	6.55771e-19	1.00658e-17
ENSG00000065882	1107.72	TBC1D1	TBC1 domain family member 1 [Source:HGNC Symbol;Acc:HGNC:11578]	0.0689411	0.0504776	1.36578	0.172009	0.338262	0.428338	0.0495577	8.64321	5.46542e-18	7.8903e-17
ENSG00000065883	1107.7	CDK13	cyclin dependent kinase 13 [Source:HGNC Symbol;Acc:HGNC:1733]	0.0233278	0.0426674	0.546736	0.58456	0.748919	-0.0513772	0.0430322	-1.19392	0.232507	0.391582
ENSG00000065911	2048.83	MTHFD2	methylenetetrahydrofolate dehydrogenase (NADP+ dependent) 2, methenyltetrahydrofolate cyclohydrolase [Source:HGNC Symbol;Acc:HGNC:7434]	-0.680689	0.0396713	-17.1582	5.4556e-66	3.77987e-63	-0.838844	0.0401501	-20.8927	6.24152e-97	1.55091e-94
ENSG00000065923	1564.23	SLC9A7	solute carrier family 9 member A7 [Source:HGNC Symbol;Acc:HGNC:17123]	-0.050566	0.0465319	-1.08669	0.277172	0.466943	0.116312	0.0460668	2.52485	0.0115746	0.0328091
ENSG00000065970	817.573	FOXJ2	forkhead box J2 [Source:HGNC Symbol;Acc:HGNC:24818]	0.356052	0.0516116	6.89868	5.24885e-12	1.93546e-10	0.307736	0.0518623	5.93371	2.9617e-09	2.14447e-08
ENSG00000065978	16938.8	YBX1	Y-box binding protein 1 [Source:HGNC Symbol;Acc:HGNC:8014]	-0.0801076	0.0245792	-3.25916	0.00111742	0.00653473	0.0640044	0.0245217	2.61012	0.00905106	0.0264116
ENSG00000065989	14.07	PDE4A	phosphodiesterase 4A [Source:HGNC Symbol;Acc:HGNC:8780]	0.360457	0.405728	0.88842	0.374315	NA	-0.247188	0.426666	-0.579347	0.562355	0.715837
ENSG00000066027	1325.15	PPP2R5A	protein phosphatase 2 regulatory subunit B'alpha [Source:HGNC Symbol;Acc:HGNC:9309]	0.0907044	0.0397844	2.2799	0.0226137	0.0755741	-0.0290289	0.0403048	-0.720234	0.471381	0.638125
ENSG00000066032	20.0362	CTNNA2	catenin alpha 2 [Source:HGNC Symbol;Acc:HGNC:2510]	0.392707	0.285687	1.3746	0.169254	NA	1.1679	0.270374	4.31956	1.56338e-05	7.40824e-05
ENSG00000066044	2915.58	ELAVL1	ELAV like RNA binding protein 1 [Source:HGNC Symbol;Acc:HGNC:3312]	0.0990942	0.0311288	3.18336	0.00145575	0.00812704	0.306635	0.0307696	9.96553	2.15725e-23	4.24238e-22
ENSG00000066056	0.147597	TIE1	tyrosine kinase with immunoglobulin like and EGF like domains 1 [Source:HGNC Symbol;Acc:HGNC:11809]	-0.496406	5.17502	-0.0959236	0.923581	NA	-0.480001	5.17502	-0.0927536	0.926099	NA
ENSG00000066084	2089.25	DIP2B	disco interacting protein 2 homolog B [Source:HGNC Symbol;Acc:HGNC:29284]	0.0865949	0.0403037	2.14856	0.0316694	0.0974282	0.303768	0.0398469	7.62337	2.47135e-14	2.76323e-13
ENSG00000066117	792.751	SMARCD1	SWI/SNF related, matrix associated, actin dependent regulator of chromatin, subfamily d, member 1 [Source:HGNC Symbol;Acc:HGNC:11106]	0.163394	0.0550109	2.97021	0.002976	0.0147002	0.0520955	0.0555218	0.938289	0.348096	0.520569
ENSG00000066135	442.205	KDM4A	lysine demethylase 4A [Source:HGNC Symbol;Acc:HGNC:22978]	-0.243476	0.0693673	-3.50995	0.000448196	0.00305266	-0.146704	0.068825	-2.13156	0.0330433	0.0818181
ENSG00000066136	937.427	NFYC	nuclear transcription factor Y subunit gamma [Source:HGNC Symbol;Acc:HGNC:7806]	0.0761325	0.0478728	1.59031	0.111765	0.2492	-0.0470802	0.0484373	-0.971981	0.33106	0.503697
ENSG00000066185	73.719	ZMYND12	zinc finger MYND-type containing 12 [Source:HGNC Symbol;Acc:HGNC:21192]	-0.151545	0.162234	-0.934111	0.350247	0.545261	0.00563259	0.159805	0.0352466	0.971883	0.983699
ENSG00000066230	23.1653	SLC9A3	solute carrier family 9 member A3 [Source:HGNC Symbol;Acc:HGNC:11073]	0.270503	0.271605	0.995941	0.319279	NA	-0.480228	0.297598	-1.61368	0.106597	0.216173
ENSG00000066248	286.395	NGEF	neuronal guanine nucleotide exchange factor [Source:HGNC Symbol;Acc:HGNC:7807]	0.110634	0.0844746	1.30967	0.190309	0.362236	-0.26695	0.0879794	-3.03424	0.00241144	0.00804994
ENSG00000066279	963.914	ASPM	abnormal spindle microtubule assembly [Source:HGNC Symbol;Acc:HGNC:19048]	0.25287	0.0638182	3.96236	7.4213e-05	0.000633553	0.888111	0.0623661	14.2403	5.15147e-46	2.98913e-44
ENSG00000066294	0.18496	CD84	CD84 molecule [Source:HGNC Symbol;Acc:HGNC:1704]	0.224929	4.31179	0.052166	0.958396	NA	0.95337	4.3115	0.221122	0.824997	NA
ENSG00000066322	3326.08	ELOVL1	ELOVL fatty acid elongase 1 [Source:HGNC Symbol;Acc:HGNC:14418]	0.0850528	0.0357155	2.3814	0.0172469	0.0610975	0.0237579	0.0358314	0.663045	0.507301	0.669117
ENSG00000066336	5.23237	SPI1	Spi-1 proto-oncogene [Source:HGNC Symbol;Acc:HGNC:11241]	-0.126864	0.613161	-0.206901	0.836087	NA	-0.0118233	0.605662	-0.0195212	0.984425	0.991322
ENSG00000066379	110.734	ZNRD1	zinc ribbon domain containing 1 [Source:HGNC Symbol;Acc:HGNC:13182]	0.0283452	0.124263	0.228106	0.819564	0.90464	-0.0632701	0.125673	-0.503451	0.614648	0.758774
ENSG00000066382	0.225075	MPPED2	metallophosphoesterase domain containing 2 [Source:HGNC Symbol;Acc:HGNC:1180]	1.00874	5.94396	0.169709	0.865239	NA	-0.480029	5.94781	-0.0807069	0.935675	NA
ENSG00000066405	0.185113	CLDN18	claudin 18 [Source:HGNC Symbol;Acc:HGNC:2039]	-0.49641	4.29936	-0.115461	0.908079	NA	-0.480005	4.29936	-0.111646	0.911104	NA
ENSG00000066422	1024.27	ZBTB11	zinc finger and BTB domain containing 11 [Source:HGNC Symbol;Acc:HGNC:16740]	0.518238	0.0456145	11.3613	6.52024e-30	1.20891e-27	0.564133	0.0455138	12.3948	2.78978e-35	9.80417e-34
ENSG00000066427	385.794	ATXN3	ataxin 3 [Source:HGNC Symbol;Acc:HGNC:7106]	-0.118871	0.0653056	-1.82022	0.0687252	0.174551	0.196467	0.0630587	3.11561	0.00183563	0.00626035
ENSG00000066455	1163.97	GOLGA5	golgin A5 [Source:HGNC Symbol;Acc:HGNC:4428]	-0.244921	0.0477688	-5.12722	2.9405e-07	4.48018e-06	-0.254811	0.0478632	-5.32374	1.01658e-07	6.30947e-07
ENSG00000066468	5.86183	FGFR2	fibroblast growth factor receptor 2 [Source:HGNC Symbol;Acc:HGNC:3689]	-1.0337	0.55847	-1.85094	0.0641776	NA	-0.229887	0.503791	-0.456314	0.648164	0.782949
ENSG00000066557	895.43	LRRC40	leucine rich repeat containing 40 [Source:HGNC Symbol;Acc:HGNC:26004]	0.0433808	0.0572434	0.757831	0.448552	0.638555	0.534102	0.0556481	9.59784	8.16356e-22	1.49026e-20
ENSG00000066583	943.355	ISOC1	isochorismatase domain containing 1 [Source:HGNC Symbol;Acc:HGNC:24254]	0.188938	0.0516618	3.65721	0.000254979	0.00186371	0.737468	0.0499166	14.774	2.15542e-49	1.44596e-47
ENSG00000066629	469.168	EML1	EMAP like 1 [Source:HGNC Symbol;Acc:HGNC:3330]	-0.144779	0.0646937	-2.23792	0.0252263	0.082015	-0.358849	0.0661276	-5.42661	5.74356e-08	3.67494e-07
ENSG00000066651	280.707	TRMT11	tRNA methyltransferase 11 homolog [Source:HGNC Symbol;Acc:HGNC:21080]	-0.0603732	0.0864429	-0.698416	0.484917	0.670319	-0.171592	0.0874033	-1.96322	0.0496201	0.115294
ENSG00000066654	2057.54	THUMPD1	THUMP domain containing 1 [Source:HGNC Symbol;Acc:HGNC:23807]	0.286479	0.0365857	7.83034	4.86551e-15	2.64668e-13	0.387749	0.0364161	10.6477	1.78651e-26	4.07042e-25
ENSG00000066697	302.567	MSANTD3	Myb/SANT DNA binding domain containing 3 [Source:HGNC Symbol;Acc:HGNC:23370]	0.00853075	0.0852138	0.10011	0.920257	0.961755	0.0915478	0.0847261	1.08051	0.279913	0.447239
ENSG00000066735	16.3501	KIF26A	kinesin family member 26A [Source:HGNC Symbol;Acc:HGNC:20226]	0.657983	0.361181	1.82175	0.0684925	NA	-0.366743	0.390857	-0.938303	0.348089	0.520569
ENSG00000066739	1370.4	ATG2B	autophagy related 2B [Source:HGNC Symbol;Acc:HGNC:20187]	-0.172748	0.0492695	-3.50618	0.000454592	0.00308691	-0.147905	0.0492418	-3.00364	0.0026677	0.00882313
ENSG00000066777	2476.49	ARFGEF1	ADP ribosylation factor guanine nucleotide exchange factor 1 [Source:HGNC Symbol;Acc:HGNC:15772]	0.0427819	0.0324368	1.31893	0.187193	0.358482	0.121507	0.0322945	3.76248	0.000168237	0.000683465
ENSG00000066813	0	ACSM2B	acyl-CoA synthetase medium chain family member 2B [Source:HGNC Symbol;Acc:HGNC:30931]	NA	NA	NA	NA	NA	NA	NA	NA	NA	NA
ENSG00000066827	206.872	ZFAT	zinc finger and AT-hook domain containing [Source:HGNC Symbol;Acc:HGNC:19899]	-0.123213	0.0966414	-1.27495	0.202328	0.377983	0.00177023	0.095584	0.0185202	0.985224	0.991562
ENSG00000066855	2243.72	MTFR1	mitochondrial fission regulator 1 [Source:HGNC Symbol;Acc:HGNC:29510]	0.0498193	0.0381435	1.3061	0.191518	0.363643	0.0798272	0.0381115	2.09457	0.0362092	0.0884234
ENSG00000066923	31.02	STAG3	stromal antigen 3 [Source:HGNC Symbol;Acc:HGNC:11356]	0.00721555	0.250592	0.028794	0.977029	0.989225	0.330983	0.243191	1.361	0.173514	0.316256
ENSG00000066926	7494.52	FECH	ferrochelatase [Source:HGNC Symbol;Acc:HGNC:3647]	-0.195658	0.0290262	-6.74074	1.57585e-11	5.3742e-10	-0.319568	0.0291479	-10.9637	5.71295e-28	1.40797e-26
ENSG00000066933	525.677	MYO9A	myosin IXA [Source:HGNC Symbol;Acc:HGNC:7608]	0.248814	0.0688054	3.6162	0.000298963	0.00214589	0.365754	0.068338	5.35213	8.69232e-08	5.46237e-07
ENSG00000067048	1989.63	DDX3Y	DEAD-box helicase 3 Y-linked [Source:HGNC Symbol;Acc:HGNC:2699]	0.0896079	0.0466815	1.91956	0.0549135	0.147768	0.264661	0.0463898	5.70515	1.16241e-08	7.94284e-08
ENSG00000067057	1146.09	PFKP	phosphofructokinase, platelet [Source:HGNC Symbol;Acc:HGNC:8878]	0.122855	0.0583541	2.10533	0.0352627	0.105452	-0.586632	0.0605167	-9.69372	3.20627e-22	5.96123e-21
ENSG00000067064	1780.17	IDI1	isopentenyl-diphosphate delta isomerase 1 [Source:HGNC Symbol;Acc:HGNC:5387]	0.121692	0.0423587	2.87289	0.00406732	0.0190062	0.149773	0.0423293	3.53828	0.000402738	0.00154099
ENSG00000067066	259.187	SP100	SP100 nuclear antigen [Source:HGNC Symbol;Acc:HGNC:11206]	-0.215809	0.0853403	-2.5288	0.0114453	0.0439773	-0.402723	0.0873305	-4.61149	3.99801e-06	2.05056e-05
ENSG00000067082	398.276	KLF6	Kruppel like factor 6 [Source:HGNC Symbol;Acc:HGNC:2235]	-0.110421	0.0732539	-1.50737	0.131717	0.280898	0.581198	0.0689907	8.42429	3.62935e-17	4.96152e-16
ENSG00000067113	3529.47	PLPP1	phospholipid phosphatase 1 [Source:HGNC Symbol;Acc:HGNC:9228]	-0.0889575	0.0348193	-2.55483	0.010624	0.0414382	-0.350922	0.0352521	-9.95465	2.40672e-23	4.7242e-22
ENSG00000067141	994.132	NEO1	neogenin 1 [Source:HGNC Symbol;Acc:HGNC:7754]	-0.0192736	0.0473021	-0.407457	0.683672	0.818616	0.0505917	0.0470963	1.07422	0.282725	0.450334
ENSG00000067167	2921.72	TRAM1	translocation associated membrane protein 1 [Source:HGNC Symbol;Acc:HGNC:20568]	-0.172232	0.0363458	-4.7387	2.15091e-06	2.73306e-05	-0.258348	0.0365379	-7.07068	1.54174e-12	1.48962e-11
ENSG00000067177	818.413	PHKA1	phosphorylase kinase regulatory subunit alpha 1 [Source:HGNC Symbol;Acc:HGNC:8925]	0.0236753	0.0480263	0.492966	0.622037	0.774839	-0.117372	0.0487379	-2.40823	0.0160299	0.0435489
ENSG00000067182	1375.63	TNFRSF1A	TNF receptor superfamily member 1A [Source:HGNC Symbol;Acc:HGNC:11916]	-0.208952	0.0419456	-4.9815	6.30938e-07	8.9694e-06	-0.544779	0.0432399	-12.599	2.13906e-36	7.87093e-35
ENSG00000067191	40.8304	CACNB1	calcium voltage-gated channel auxiliary subunit beta 1 [Source:HGNC Symbol;Acc:HGNC:1401]	0.0362959	0.22239	0.163208	0.870355	0.932709	-0.509527	0.236075	-2.15832	0.0309027	0.077266
ENSG00000067208	627.815	EVI5	ecotropic viral integration site 5 [Source:HGNC Symbol;Acc:HGNC:3501]	0.0144608	0.0669374	0.216034	0.828961	0.909903	-0.063464	0.0673614	-0.942143	0.34612	0.518651
ENSG00000067221	431.662	STOML1	stomatin like 1 [Source:HGNC Symbol;Acc:HGNC:14560]	0.105526	0.0684893	1.54077	0.123374	0.268022	-0.276513	0.0710014	-3.89448	9.84095e-05	0.000415037
ENSG00000067225	25031.3	PKM	pyruvate kinase M1/2 [Source:HGNC Symbol;Acc:HGNC:9021]	-0.0288771	0.0168926	-1.70945	0.087367	0.208578	0.187768	0.0168042	11.1739	5.47491e-29	1.41884e-27
ENSG00000067248	1656.8	DHX29	DExH-box helicase 29 [Source:HGNC Symbol;Acc:HGNC:15815]	-0.0780551	0.0400582	-1.94854	0.0513503	0.14077	0.177023	0.0393417	4.49962	6.80743e-06	3.37432e-05
ENSG00000067334	2048.31	DNTTIP2	deoxynucleotidyltransferase terminal interacting protein 2 [Source:HGNC Symbol;Acc:HGNC:24013]	0.214572	0.0503137	4.26469	2.00181e-05	0.000199032	-0.00913696	0.0507216	-0.180139	0.857043	0.919195
ENSG00000067365	290.427	METTL22	methyltransferase like 22 [Source:HGNC Symbol;Acc:HGNC:28368]	-0.102625	0.0801097	-1.28106	0.200173	0.375261	0.194326	0.077826	2.49692	0.0125276	0.0351436
ENSG00000067369	718.463	TP53BP1	tumor protein p53 binding protein 1 [Source:HGNC Symbol;Acc:HGNC:11999]	-0.0849047	0.0578342	-1.46807	0.142085	0.29707	-0.351168	0.059162	-5.9357	2.92597e-09	2.12077e-08
ENSG00000067445	9.6898	TRO	trophinin [Source:HGNC Symbol;Acc:HGNC:12326]	-0.380958	0.403484	-0.944172	0.345082	NA	-0.753621	0.422694	-1.7829	0.0746025	0.161848
ENSG00000067533	966.929	RRP15	ribosomal RNA processing 15 homolog [Source:HGNC Symbol;Acc:HGNC:24255]	0.273739	0.0438113	6.24814	4.15376e-10	1.14155e-08	0.275986	0.0438644	6.2918	3.13804e-10	2.48048e-09
ENSG00000067560	8388.45	RHOA	ras homolog family member A [Source:HGNC Symbol;Acc:HGNC:667]	-0.0189793	0.0216479	-0.876726	0.380635	0.576471	0.271478	0.0213762	12.7	5.91296e-37	2.23413e-35
ENSG00000067596	1166.89	DHX8	DEAH-box helicase 8 [Source:NCBI gene;Acc:1659]	-0.189393	0.0422066	-4.48728	7.21382e-06	8.03407e-05	-0.128343	0.0420311	-3.05352	0.00226173	0.0075946
ENSG00000067601	161.877	PMS2P4	PMS1 homolog 2, mismatch repair system component pseudogene 4 [Source:HGNC Symbol;Acc:HGNC:9129]	-0.0341322	0.120537	-0.283167	0.777049	0.87898	0.0381949	0.119879	0.318613	0.75002	0.852501
ENSG00000067606	537.373	PRKCZ	protein kinase C zeta [Source:HGNC Symbol;Acc:HGNC:9412]	0.0169711	0.0655702	0.258824	0.795771	0.890549	-0.227136	0.0670952	-3.38528	0.000711048	0.00260898
ENSG00000067646	725.431	ZFY	zinc finger protein Y-linked [Source:HGNC Symbol;Acc:HGNC:12870]	0.192603	0.0582144	3.30852	0.000937905	0.00566097	0.157964	0.0584337	2.7033	0.00686543	0.0206618
ENSG00000067704	5012.24	IARS2	isoleucyl-tRNA synthetase 2, mitochondrial [Source:HGNC Symbol;Acc:HGNC:29685]	-0.057968	0.028815	-2.01173	0.0442482	0.125779	0.0908646	0.0286419	3.17243	0.00151166	0.00523408
ENSG00000067715	1.04938	SYT1	synaptotagmin 1 [Source:HGNC Symbol;Acc:HGNC:11509]	-1.35803	1.72631	-0.786669	0.431476	NA	-1.35765	1.73383	-0.783035	0.433607	NA
ENSG00000067798	43.0486	NAV3	neuron navigator 3 [Source:HGNC Symbol;Acc:HGNC:15998]	-0.256982	0.205568	-1.2501	0.211262	0.38983	0.45307	0.194085	2.33439	0.0195751	0.0518102
ENSG00000067829	1003.17	IDH3G	isocitrate dehydrogenase (NAD(+)) 3 non-catalytic subunit gamma [Source:HGNC Symbol;Acc:HGNC:5386]	-0.0681144	0.0463005	-1.47114	0.141254	0.29567	-0.113456	0.0465689	-2.43632	0.0148377	0.0406944
ENSG00000067836	542.932	ROGDI	rogdi atypical leucine zipper [Source:HGNC Symbol;Acc:HGNC:29478]	-0.0918653	0.0698356	-1.31545	0.188358	0.35972	-0.132731	0.0701407	-1.89236	0.0584436	0.13212
ENSG00000067840	61.5096	PDZD4	PDZ domain containing 4 [Source:HGNC Symbol;Acc:HGNC:21167]	-0.011164	0.183768	-0.0607506	0.951558	0.977015	-0.356328	0.190323	-1.87223	0.0611751	0.137265
ENSG00000067842	0.22462	ATP2B3	ATPase plasma membrane Ca2+ transporting 3 [Source:HGNC Symbol;Acc:HGNC:816]	0	3.32658	0	1	NA	0.962646	3.32658	0.28938	0.772291	NA
ENSG00000067900	1945.69	ROCK1	Rho associated coiled-coil containing protein kinase 1 [Source:HGNC Symbol;Acc:HGNC:10251]	0.195488	0.0333781	5.85677	4.71949e-09	1.05839e-07	0.219173	0.0333573	6.57048	5.01539e-11	4.22875e-10
ENSG00000067955	1562.86	CBFB	core-binding factor subunit beta [Source:HGNC Symbol;Acc:HGNC:1539]	0.0792556	0.0377766	2.09801	0.0359046	0.10696	0.137903	0.0376551	3.66227	0.000249989	0.000988025
ENSG00000067992	880.856	PDK3	pyruvate dehydrogenase kinase 3 [Source:HGNC Symbol;Acc:HGNC:8811]	-0.0242922	0.0585542	-0.414867	0.67824	0.815523	-0.0562276	0.0587243	-0.957484	0.338323	0.511456
ENSG00000068001	763.931	HYAL2	hyaluronidase 2 [Source:HGNC Symbol;Acc:HGNC:5321]	0.302417	0.0516549	5.85456	4.7826e-09	1.06528e-07	0.036974	0.0529083	0.698832	0.484657	0.64985
ENSG00000068024	226.624	HDAC4	histone deacetylase 4 [Source:HGNC Symbol;Acc:HGNC:14063]	0.164282	0.0979345	1.67746	0.0934518	0.218702	-0.28635	0.101716	-2.81519	0.0048749	0.0152199
ENSG00000068028	568.486	RASSF1	Ras association domain family member 1 [Source:HGNC Symbol;Acc:HGNC:9882]	0.0520029	0.0591816	0.8787	0.379564	0.575322	-0.151183	0.0603025	-2.50708	0.0121735	0.0342639
ENSG00000068078	410.164	FGFR3	fibroblast growth factor receptor 3 [Source:HGNC Symbol;Acc:HGNC:3690]	0.0349538	0.062289	0.561154	0.574692	0.742492	-1.02166	0.0706457	-14.4617	2.11421e-47	1.30187e-45
ENSG00000068079	138.621	IFI35	interferon induced protein 35 [Source:HGNC Symbol;Acc:HGNC:5399]	-0.233438	0.114276	-2.04276	0.0410763	0.118659	-0.657395	0.120403	-5.45995	4.76268e-08	3.07059e-07
ENSG00000068097	558.496	HEATR6	HEAT repeat containing 6 [Source:HGNC Symbol;Acc:HGNC:24076]	0.145865	0.0597151	2.44268	0.0145786	0.053544	0.16303	0.0597111	2.73031	0.00632742	0.0192235
ENSG00000068120	2073.72	COASY	Coenzyme A synthase [Source:HGNC Symbol;Acc:HGNC:29932]	0.0382125	0.0415416	0.919861	0.357646	0.552328	-0.1202	0.0419198	-2.86737	0.00413893	0.0131338
ENSG00000068137	2334.24	PLEKHH3	pleckstrin homology, MyTH4 and FERM domain containing H3 [Source:HGNC Symbol;Acc:HGNC:26105]	-0.0813808	0.0488175	-1.66704	0.0955063	0.222403	-0.0615226	0.0488098	-1.26046	0.207505	0.360509
ENSG00000068305	766.799	MEF2A	myocyte enhancer factor 2A [Source:HGNC Symbol;Acc:HGNC:6993]	0.0993172	0.05014	1.9808	0.047614	0.132805	0.374835	0.0489963	7.65026	2.00577e-14	2.25459e-13
ENSG00000068308	1307.01	OTUD5	OTU deubiquitinase 5 [Source:HGNC Symbol;Acc:HGNC:25402]	0.076035	0.0431613	1.76165	0.0781291	0.192531	-0.117537	0.0438786	-2.67868	0.00739137	0.022061
ENSG00000068323	1570.83	TFE3	transcription factor binding to IGHM enhancer 3 [Source:HGNC Symbol;Acc:HGNC:11752]	-0.0246458	0.0445219	-0.553567	0.579875	0.745697	-0.261313	0.0452458	-5.77541	7.67662e-09	5.33524e-08
ENSG00000068354	302.459	TBC1D25	TBC1 domain family member 25 [Source:HGNC Symbol;Acc:HGNC:8092]	0.0386725	0.092019	0.420266	0.674291	0.812868	-0.0661558	0.0928633	-0.7124	0.476217	0.642721
ENSG00000068366	51.0648	ACSL4	acyl-CoA synthetase long chain family member 4 [Source:HGNC Symbol;Acc:HGNC:3571]	-0.0158157	0.197933	-0.0799045	0.936313	0.969758	0.19164	0.194271	0.986458	0.323908	0.49578
ENSG00000068383	1270.26	INPP5A	inositol polyphosphate-5-phosphatase A [Source:HGNC Symbol;Acc:HGNC:6076]	0.0647023	0.0381882	1.6943	0.0902078	0.21331	-0.272633	0.039665	-6.87339	6.26958e-12	5.75488e-11
ENSG00000068394	573.241	GPKOW	G-patch domain and KOW motifs [Source:HGNC Symbol;Acc:HGNC:30677]	0.130573	0.0630098	2.07227	0.0382403	0.112065	0.658106	0.0605494	10.8689	1.62128e-27	3.89567e-26
ENSG00000068400	927.5	GRIPAP1	GRIP1 associated protein 1 [Source:HGNC Symbol;Acc:HGNC:18706]	-0.207871	0.0483777	-4.29683	1.73255e-05	0.000175711	-0.262207	0.0487166	-5.38228	7.35466e-08	4.64835e-07
ENSG00000068438	904.373	FTSJ1	FtsJ RNA 2'-O-methyltransferase 1 [Source:HGNC Symbol;Acc:HGNC:13254]	-0.0436493	0.0504715	-0.864831	0.387132	0.582647	-0.0729098	0.0506585	-1.43924	0.150082	0.28292
ENSG00000068489	969.565	PRR11	proline rich 11 [Source:HGNC Symbol;Acc:HGNC:25619]	0.0941085	0.0664332	1.41659	0.156603	0.317647	0.350665	0.0658389	5.3261	1.00343e-07	6.23338e-07
ENSG00000068615	36.071	REEP1	receptor accessory protein 1 [Source:HGNC Symbol;Acc:HGNC:25786]	0.124085	0.238924	0.519352	0.603516	0.762079	0.275238	0.235863	1.16694	0.243236	0.403882
ENSG00000068650	1407.54	ATP11A	ATPase phospholipid transporting 11A [Source:HGNC Symbol;Acc:HGNC:13552]	0.112647	0.0399765	2.81783	0.00483497	0.0219702	-0.0771379	0.0407436	-1.89325	0.0583244	0.131906
ENSG00000068654	2563.07	POLR1A	RNA polymerase I subunit A [Source:HGNC Symbol;Acc:HGNC:17264]	0.266479	0.0398754	6.68279	2.34439e-11	7.73473e-10	0.0945127	0.0401824	2.35209	0.0186681	0.0497046
ENSG00000068697	3260.4	LAPTM4A	lysosomal protein transmembrane 4 alpha [Source:HGNC Symbol;Acc:HGNC:6924]	-0.135469	0.0342116	-3.95973	7.50337e-05	0.00063973	-0.0340034	0.0340623	-0.998272	0.318147	0.490087
ENSG00000068724	109.058	TTC7A	tetratricopeptide repeat domain 7A [Source:HGNC Symbol;Acc:HGNC:19750]	-0.140976	0.143924	-0.979516	0.327325	0.522082	-0.496719	0.148431	-3.34647	0.000818462	0.00297278
ENSG00000068745	2128.7	IP6K2	inositol hexakisphosphate kinase 2 [Source:HGNC Symbol;Acc:HGNC:17313]	0.0764264	0.0349133	2.18903	0.0285945	0.0901815	0.327317	0.034348	9.52945	1.58126e-21	2.84236e-20
ENSG00000068781	0.0313497	STON1-GTF2A1L	STON1-GTF2A1L readthrough [Source:HGNC Symbol;Acc:HGNC:30651]	0	5.94781	0	1	NA	0	5.94781	0	1	NA
ENSG00000068784	373.862	SRBD1	S1 RNA binding domain 1 [Source:HGNC Symbol;Acc:HGNC:25521]	-0.070136	0.0759376	-0.923601	0.355694	0.550791	0.048471	0.0752728	0.643938	0.519616	0.679218
ENSG00000068796	956.246	KIF2A	kinesin family member 2A [Source:HGNC Symbol;Acc:HGNC:6318]	0.18788	0.0557254	3.37153	0.000747514	0.00470151	0.302825	0.0553927	5.46689	4.58008e-08	2.95919e-07
ENSG00000068831	2.37366	RASGRP2	RAS guanyl releasing protein 2 [Source:HGNC Symbol;Acc:HGNC:9879]	1.03456	0.962592	1.07476	0.282482	NA	0.697571	0.983689	0.709137	0.478239	0.644477
ENSG00000068878	2588.94	PSME4	proteasome activator subunit 4 [Source:HGNC Symbol;Acc:HGNC:20635]	-0.074274	0.0436592	-1.70122	0.0889012	0.210902	-0.195818	0.0438895	-4.46161	8.13466e-06	3.9947e-05
ENSG00000068885	194.682	IFT80	intraflagellar transport 80 [Source:HGNC Symbol;Acc:HGNC:29262]	-0.100831	0.100397	-1.00432	0.315222	0.509027	-0.187057	0.101496	-1.843	0.0653287	0.145014
ENSG00000068903	1387.51	SIRT2	sirtuin 2 [Source:HGNC Symbol;Acc:HGNC:10886]	-0.141427	0.0482289	-2.93241	0.00336343	0.0162559	-0.256837	0.0486539	-5.27886	1.29991e-07	7.9789e-07
ENSG00000068912	732.491	ERLEC1	endoplasmic reticulum lectin 1 [Source:HGNC Symbol;Acc:HGNC:25222]	-0.203614	0.0556935	-3.65597	0.00025621	0.00187167	-0.200508	0.0557569	-3.59611	0.000323014	0.00125619
ENSG00000068971	441.557	PPP2R5B	protein phosphatase 2 regulatory subunit B'beta [Source:HGNC Symbol;Acc:HGNC:9310]	-0.0319946	0.0687081	-0.46566	0.641459	0.789617	-0.455855	0.0718566	-6.34396	2.23936e-10	1.78886e-09
ENSG00000068976	3.00534	PYGM	glycogen phosphorylase, muscle associated [Source:HGNC Symbol;Acc:HGNC:9726]	-1.68957	0.958557	-1.76262	0.0779643	NA	0.037498	0.745679	0.050287	0.959894	0.977952
ENSG00000068985	10.8534	PAGE1	PAGE family member 1 [Source:HGNC Symbol;Acc:HGNC:4107]	-0.304264	0.441741	-0.688783	0.49096	NA	-0.10791	0.432979	-0.249227	0.803185	0.886463
ENSG00000069011	1483.29	PITX1	paired like homeodomain 1 [Source:HGNC Symbol;Acc:HGNC:9004]	-0.00316961	0.0689095	-0.0459967	0.963313	0.981907	-0.529105	0.070109	-7.54689	4.45776e-14	4.88089e-13
ENSG00000069018	0.687619	TRPC7	transient receptor potential cation channel subfamily C member 7 [Source:HGNC Symbol;Acc:HGNC:20754]	0.00212342	1.47932	0.0014354	0.998855	NA	-2.28333	1.69733	-1.34524	0.178547	NA
ENSG00000069020	848.632	MAST4	microtubule associated serine/threonine kinase family member 4 [Source:HGNC Symbol;Acc:HGNC:19037]	-0.0483161	0.0544836	-0.886802	0.375186	0.570646	0.354448	0.0527509	6.71928	1.82624e-11	1.6005e-10
ENSG00000069122	0.516596	ADGRF5	adhesion G protein-coupled receptor F5 [Source:HGNC Symbol;Acc:HGNC:19030]	2.00201	2.34034	0.855437	0.392309	NA	-0.480014	2.45293	-0.19569	0.844853	NA
ENSG00000069188	1.94616	SDK2	sidekick cell adhesion molecule 2 [Source:HGNC Symbol;Acc:HGNC:19308]	-0.781938	1.17561	-0.665135	0.505964	NA	-0.757542	1.17418	-0.645167	0.518819	0.678611
ENSG00000069206	175.983	ADAM7	ADAM metallopeptidase domain 7 [Source:HGNC Symbol;Acc:HGNC:214]	-0.0296245	0.0870556	-0.340294	0.733635	0.852096	-0.764621	0.0942039	-8.11666	4.79198e-16	6.03166e-15
ENSG00000069248	1666.61	NUP133	nucleoporin 133 [Source:HGNC Symbol;Acc:HGNC:18016]	0.0866198	0.0395183	2.19189	0.0283873	0.089743	0.305281	0.0390014	7.82743	4.9796e-15	5.85276e-14
ENSG00000069275	10838.6	NUCKS1	nuclear casein kinase and cyclin dependent kinase substrate 1 [Source:HGNC Symbol;Acc:HGNC:29923]	-0.00192637	0.032953	-0.0584581	0.953384	0.977737	-0.014267	0.0329665	-0.432774	0.665179	0.79316
ENSG00000069329	3653.66	VPS35	VPS35 retromer complex component [Source:HGNC Symbol;Acc:HGNC:13487]	-0.103026	0.0319319	-3.22643	0.00125344	0.00718025	0.181016	0.0315055	5.74553	9.16322e-09	6.31852e-08
ENSG00000069345	3825.23	DNAJA2	DnaJ heat shock protein family (Hsp40) member A2 [Source:HGNC Symbol;Acc:HGNC:14884]	0.190491	0.0292898	6.50367	7.83819e-11	2.43354e-09	0.209868	0.0292843	7.16658	7.68929e-13	7.63184e-12
ENSG00000069399	156.464	BCL3	BCL3 transcription coactivator [Source:HGNC Symbol;Acc:HGNC:998]	0.169908	0.105613	1.60878	0.107665	0.242733	-0.412501	0.112523	-3.66591	0.000246458	0.000975348
ENSG00000069424	603.075	KCNAB2	potassium voltage-gated channel subfamily A regulatory beta subunit 2 [Source:HGNC Symbol;Acc:HGNC:6229]	0.0212141	0.0642409	0.330228	0.741228	0.856675	-0.229774	0.0657032	-3.49715	0.000470262	0.0017816
ENSG00000069431	0.804715	ABCC9	ATP binding cassette subfamily C member 9 [Source:HGNC Symbol;Acc:HGNC:60]	1.64878	1.96524	0.838972	0.401485	NA	4.264	1.73605	2.45616	0.0140433	NA
ENSG00000069482	265.913	GAL	galanin and GMAP prepropeptide [Source:HGNC Symbol;Acc:HGNC:4114]	-0.00325501	0.0907169	-0.035881	0.971377	0.985831	-0.420997	0.0942519	-4.46672	7.9429e-06	3.90235e-05
ENSG00000069493	24.0074	CLEC2D	C-type lectin domain family 2 member D [Source:HGNC Symbol;Acc:HGNC:14351]	-0.206086	0.270432	-0.762062	0.446023	NA	0.0115725	0.264184	0.0438045	0.96506	0.980331
ENSG00000069509	1.90454	FUNDC1	FUN14 domain containing 1 [Source:HGNC Symbol;Acc:HGNC:28746]	0.210686	1.06902	0.197082	0.843763	NA	0.242016	1.06759	0.226694	0.820662	0.896978
ENSG00000069535	2.97678	MAOB	monoamine oxidase B [Source:HGNC Symbol;Acc:HGNC:6834]	-0.511435	0.796404	-0.64218	0.520756	NA	-0.635449	0.807347	-0.787083	0.431233	0.601749
ENSG00000069667	23.1121	RORA	RAR related orphan receptor A [Source:HGNC Symbol;Acc:HGNC:10258]	-0.0720143	0.268443	-0.268266	0.788494	NA	-0.186208	0.272418	-0.683536	0.494268	0.658003
ENSG00000069696	12.3613	DRD4	dopamine receptor D4 [Source:HGNC Symbol;Acc:HGNC:3025]	0.292082	0.377338	0.774059	0.438896	NA	-0.417801	0.405044	-1.03149	0.302309	0.472115
ENSG00000069702	152.49	TGFBR3	transforming growth factor beta receptor 3 [Source:HGNC Symbol;Acc:HGNC:11774]	0.214384	0.142513	1.50432	0.1325	0.282266	0.761173	0.13858	5.49267	3.95905e-08	2.56894e-07
ENSG00000069764	0.309293	PLA2G10	phospholipase A2 group X [Source:HGNC Symbol;Acc:HGNC:9029]	-2.23376	3.382	-0.660485	0.508943	NA	-0.178393	3.32952	-0.0535792	0.95727	NA
ENSG00000069812	14.1837	HES2	hes family bHLH transcription factor 2 [Source:HGNC Symbol;Acc:HGNC:16005]	-0.274345	0.341208	-0.804038	0.421375	NA	0.259045	0.322726	0.802677	0.422161	0.593758
ENSG00000069849	3446.32	ATP1B3	ATPase Na+/K+ transporting subunit beta 3 [Source:HGNC Symbol;Acc:HGNC:806]	-0.0381706	0.0353909	-1.07854	0.280792	0.470652	0.111082	0.0351879	3.15682	0.00159502	0.00549655
ENSG00000069869	352.379	NEDD4	NEDD4 E3 ubiquitin protein ligase [Source:HGNC Symbol;Acc:HGNC:7727]	-0.202905	0.0780091	-2.60105	0.00929396	0.0370744	0.0946094	0.0761372	1.24262	0.214009	0.368926
ENSG00000069943	223.992	PIGB	phosphatidylinositol glycan anchor biosynthesis class B [Source:HGNC Symbol;Acc:HGNC:8959]	-0.346669	0.102615	-3.37834	0.000729249	0.00460423	-0.463063	0.103877	-4.45781	8.28003e-06	4.06042e-05
ENSG00000069956	5277.08	MAPK6	mitogen-activated protein kinase 6 [Source:HGNC Symbol;Acc:HGNC:6879]	-0.131217	0.0447167	-2.93441	0.00334177	0.0161977	0.13303	0.0445426	2.98658	0.00282122	0.00929013
ENSG00000069966	300.917	GNB5	G protein subunit beta 5 [Source:HGNC Symbol;Acc:HGNC:4401]	-0.00831816	0.0943793	-0.0881355	0.929769	0.966936	0.398981	0.0917754	4.34736	1.37787e-05	6.58564e-05
ENSG00000069974	253.411	RAB27A	RAB27A, member RAS oncogene family [Source:HGNC Symbol;Acc:HGNC:9766]	0.00705353	0.0812149	0.0868503	0.930791	0.967387	0.0622285	0.0809212	0.769001	0.441893	0.611052
ENSG00000069998	1444.84	HDHD5	haloacid dehalogenase like hydrolase domain containing 5 [Source:HGNC Symbol;Acc:HGNC:1843]	-0.00197288	0.0399361	-0.049401	0.9606	0.981039	0.159105	0.0394785	4.03017	5.57363e-05	0.000244742
ENSG00000070010	819.413	UFD1	ubiquitin recognition factor in ER associated degradation 1 [Source:HGNC Symbol;Acc:HGNC:12520]	-0.144213	0.0534981	-2.69567	0.00702468	0.0297532	-0.0337654	0.0530963	-0.635928	0.524824	0.683993
ENSG00000070018	680.051	LRP6	LDL receptor related protein 6 [Source:HGNC Symbol;Acc:HGNC:6698]	0.0225093	0.0562608	0.400089	0.689091	0.821517	0.237213	0.0552705	4.29185	1.77188e-05	8.32754e-05
ENSG00000070019	0.435886	GUCY2C	guanylate cyclase 2C [Source:HGNC Symbol;Acc:HGNC:4688]	-0.496419	2.52243	-0.196802	0.843983	NA	0.964901	2.52137	0.382689	0.701951	NA
ENSG00000070031	1.8903	SCT	secretin [Source:HGNC Symbol;Acc:HGNC:10607]	0.618387	1.08462	0.570142	0.568581	NA	0.64586	1.08369	0.595983	0.551187	0.706633
ENSG00000070047	2395.1	PHRF1	PHD and ring finger domains 1 [Source:HGNC Symbol;Acc:HGNC:24351]	0.129085	0.0340867	3.78696	0.000152499	0.00118928	-0.0532889	0.0345173	-1.54383	0.122629	0.241655
ENSG00000070061	738.738	ELP1	elongator complex protein 1 [Source:HGNC Symbol;Acc:HGNC:5959]	-0.198387	0.0536902	-3.69504	0.00021985	0.00163879	-0.413137	0.0548728	-7.529	5.11285e-14	5.56929e-13
ENSG00000070081	1846.5	NUCB2	nucleobindin 2 [Source:HGNC Symbol;Acc:HGNC:8044]	-0.244767	0.0628425	-3.89493	9.82252e-05	0.000808653	-0.333695	0.0630959	-5.2887	1.23191e-07	7.59021e-07
ENSG00000070087	1718.03	PFN2	profilin 2 [Source:HGNC Symbol;Acc:HGNC:8882]	-0.00789317	0.0339696	-0.23236	0.816259	0.902899	0.135135	0.0335619	4.02643	5.6629e-05	0.000248455
ENSG00000070159	917.087	PTPN3	protein tyrosine phosphatase non-receptor type 3 [Source:HGNC Symbol;Acc:HGNC:9655]	0.000865729	0.0435996	0.0198563	0.984158	0.992011	-0.297641	0.04517	-6.58934	4.4178e-11	3.74282e-10
ENSG00000070182	7.4643	SPTB	spectrin beta, erythrocytic [Source:HGNC Symbol;Acc:HGNC:11274]	-1.01315	0.483807	-2.09412	0.0362493	NA	-0.460434	0.449194	-1.02502	0.305352	0.475709
ENSG00000070190	2.45748	DAPP1	dual adaptor of phosphotyrosine and 3-phosphoinositides 1 [Source:HGNC Symbol;Acc:HGNC:16500]	-0.989661	1.13845	-0.869303	0.384682	NA	1.61205	0.8481	1.90078	0.0573307	0.129979
ENSG00000070193	0	FGF10	fibroblast growth factor 10 [Source:HGNC Symbol;Acc:HGNC:3666]	NA	NA	NA	NA	NA	NA	NA	NA	NA	NA
ENSG00000070214	1824.86	SLC44A1	solute carrier family 44 member 1 [Source:HGNC Symbol;Acc:HGNC:18798]	0.037539	0.0385155	0.974646	0.329736	0.524232	0.46132	0.0373588	12.3484	4.97051e-35	1.72668e-33
ENSG00000070269	221.133	TMEM260	transmembrane protein 260 [Source:HGNC Symbol;Acc:HGNC:20185]	-0.191041	0.0910957	-2.09714	0.0359811	0.107041	-0.350171	0.0929007	-3.7693	0.000163705	0.00066709
ENSG00000070366	685.163	SMG6	SMG6 nonsense mediated mRNA decay factor [Source:HGNC Symbol;Acc:HGNC:17809]	0.19533	0.0508748	3.83942	0.000123328	0.000991744	0.175977	0.0510566	3.4467	0.00056748	0.00211837
ENSG00000070367	2493.76	EXOC5	exocyst complex component 5 [Source:HGNC Symbol;Acc:HGNC:10696]	-0.0752767	0.0459656	-1.63767	0.10149	0.232782	-0.0785863	0.0459968	-1.70852	0.0875406	0.184234
ENSG00000070371	113.786	CLTCL1	clathrin heavy chain like 1 [Source:HGNC Symbol;Acc:HGNC:2093]	0.248207	0.144326	1.71977	0.0854739	0.2054	0.372352	0.143223	2.5998	0.00932773	0.0271104
ENSG00000070388	18.0598	FGF22	fibroblast growth factor 22 [Source:HGNC Symbol;Acc:HGNC:3679]	0.355324	0.301672	1.17785	0.238857	NA	-0.228509	0.322674	-0.708173	0.478838	0.644971
ENSG00000070404	249.097	FSTL3	follistatin like 3 [Source:HGNC Symbol;Acc:HGNC:3973]	0.0980084	0.0891707	1.09911	0.27172	0.461241	-0.344652	0.0933194	-3.69325	0.000221408	0.000882498
ENSG00000070413	2390.82	DGCR2	DiGeorge syndrome critical region gene 2 [Source:HGNC Symbol;Acc:HGNC:2845]	0.0261631	0.0361894	0.72295	0.469711	0.658496	0.0465995	0.0361794	1.28801	0.197742	0.34842
ENSG00000070423	1721.25	RNF126	ring finger protein 126 [Source:HGNC Symbol;Acc:HGNC:21151]	0.122414	0.0618645	1.97874	0.047845	0.133382	-0.0982193	0.0622649	-1.57744	0.114694	0.229203
ENSG00000070444	498.088	MNT	MAX network transcriptional repressor [Source:HGNC Symbol;Acc:HGNC:7188]	0.0284779	0.0705832	0.403466	0.686605	0.820262	0.0317486	0.0706525	0.449362	0.653171	0.785764
ENSG00000070476	724.12	ZXDC	ZXD family zinc finger C [Source:HGNC Symbol;Acc:HGNC:28160]	0.0615763	0.0523542	1.17615	0.239536	0.424737	-0.0663111	0.0530583	-1.24978	0.21138	0.365498
ENSG00000070495	548.664	JMJD6	jumonji domain containing 6, arginine demethylase and lysine hydroxylase [Source:HGNC Symbol;Acc:HGNC:19355]	0.259473	0.0572165	4.53494	5.76204e-06	6.59005e-05	0.142916	0.0579261	2.46722	0.0136168	0.0377231
ENSG00000070501	373.832	POLB	DNA polymerase beta [Source:HGNC Symbol;Acc:HGNC:9174]	-0.193681	0.0720298	-2.6889	0.00716873	0.0302525	-0.216573	0.0723147	-2.99487	0.00274562	0.00905672
ENSG00000070526	356.659	ST6GALNAC1	ST6 N-acetylgalactosaminide alpha-2,6-sialyltransferase 1 [Source:HGNC Symbol;Acc:HGNC:23614]	-0.328291	0.0757857	-4.33183	1.47877e-05	0.000152557	-1.01129	0.0801405	-12.6189	1.66035e-36	6.16312e-35
ENSG00000070540	171.336	WIPI1	WD repeat domain, phosphoinositide interacting 1 [Source:HGNC Symbol;Acc:HGNC:25471]	-0.175306	0.0958805	-1.82838	0.0674927	0.172285	-0.28083	0.0972467	-2.88781	0.00387932	0.0123881
ENSG00000070601	145.704	FRMPD1	FERM and PDZ domain containing 1 [Source:HGNC Symbol;Acc:HGNC:29159]	-0.203395	0.124769	-1.63018	0.103064	0.235339	-0.352556	0.12659	-2.78501	0.00535259	0.0165499
ENSG00000070610	2244.51	GBA2	glucosylceramidase beta 2 [Source:HGNC Symbol;Acc:HGNC:18986]	-0.0366059	0.0299321	-1.22296	0.221343	0.402843	-0.0779359	0.0300982	-2.58939	0.00961458	0.027833
ENSG00000070614	3310.73	NDST1	N-deacetylase and N-sulfotransferase 1 [Source:HGNC Symbol;Acc:HGNC:7680]	0.205354	0.0257967	7.96047	1.71387e-15	9.89536e-14	0.0384296	0.0261792	1.46795	0.142119	0.271401
ENSG00000070669	113.089	ASNS	asparagine synthetase (glutamine-hydrolyzing) [Source:HGNC Symbol;Acc:HGNC:753]	-0.826315	0.154381	-5.35245	8.67727e-08	1.46446e-06	-1.58511	0.167484	-9.46428	2.95596e-21	5.20707e-20
ENSG00000070718	864.855	AP3M2	adaptor related protein complex 3 subunit mu 2 [Source:HGNC Symbol;Acc:HGNC:570]	0.397543	0.0470125	8.45611	2.76442e-17	1.93568e-15	0.418533	0.0469947	8.90596	5.29245e-19	8.17717e-18
ENSG00000070729	0.226121	CNGB1	cyclic nucleotide gated channel subunit beta 1 [Source:HGNC Symbol;Acc:HGNC:2151]	-2.7869	5.88957	-0.473193	0.636075	NA	-2.7705	5.88957	-0.470408	0.638064	NA
ENSG00000070731	2.15267	ST6GALNAC2	ST6 N-acetylgalactosaminide alpha-2,6-sialyltransferase 2 [Source:HGNC Symbol;Acc:HGNC:10867]	0.567537	1.00508	0.564669	0.572299	NA	-1.5692	1.34613	-1.16571	0.243733	0.404517
ENSG00000070748	0	CHAT	choline O-acetyltransferase [Source:HGNC Symbol;Acc:HGNC:1912]	NA	NA	NA	NA	NA	NA	NA	NA	NA	NA
ENSG00000070756	39011.7	PABPC1	poly(A) binding protein cytoplasmic 1 [Source:HGNC Symbol;Acc:HGNC:8554]	-0.119162	0.0200602	-5.94021	2.84651e-09	6.6794e-08	-0.00726296	0.0200361	-0.362494	0.716983	0.829003
ENSG00000070759	227.183	TESK2	testis associated actin remodelling kinase 2 [Source:HGNC Symbol;Acc:HGNC:11732]	-0.104771	0.0908624	-1.15308	0.248879	0.434737	-0.165794	0.0916624	-1.80875	0.0704902	0.154426
ENSG00000070761	675.314	CFAP20	cilia and flagella associated protein 20 [Source:HGNC Symbol;Acc:HGNC:29523]	0.171581	0.0634185	2.70553	0.00681946	0.0290754	0.317996	0.0629268	5.05342	4.33966e-07	2.50774e-06
ENSG00000070770	568.239	CSNK2A2	casein kinase 2 alpha 2 [Source:HGNC Symbol;Acc:HGNC:2459]	0.152549	0.0582671	2.61809	0.00884225	0.0358044	0.158282	0.0583241	2.71384	0.00665091	0.0200907
ENSG00000070778	372.978	PTPN21	protein tyrosine phosphatase non-receptor type 21 [Source:HGNC Symbol;Acc:HGNC:9651]	0.343256	0.0758543	4.5252	6.03397e-06	6.87635e-05	0.969419	0.0727334	13.3284	1.58281e-40	7.06777e-39
ENSG00000070785	723.087	EIF2B3	eukaryotic translation initiation factor 2B subunit gamma [Source:HGNC Symbol;Acc:HGNC:3259]	0.00265791	0.0548354	0.0484706	0.961341	0.981167	-0.0409784	0.0551062	-0.743626	0.457103	0.624561
ENSG00000070808	0.0928907	CAMK2A	calcium/calmodulin dependent protein kinase II alpha [Source:HGNC Symbol;Acc:HGNC:1460]	-0.496385	5.94781	-0.0834568	0.933488	NA	-0.47998	5.94781	-0.0806987	0.935682	NA
ENSG00000070814	2029.19	TCOF1	treacle ribosome biogenesis factor 1 [Source:HGNC Symbol;Acc:HGNC:11654]	0.513371	0.0423213	12.1303	7.29442e-34	1.65558e-31	1.06089	0.0414768	25.5779	2.68987e-144	1.95906e-141
ENSG00000070831	3133.09	CDC42	cell division cycle 42 [Source:HGNC Symbol;Acc:HGNC:1736]	0.00759947	0.0335942	0.226214	0.821035	0.905732	0.227608	0.0332451	6.84634	7.57619e-12	6.89903e-11
ENSG00000070882	112.521	OSBPL3	oxysterol binding protein like 3 [Source:HGNC Symbol;Acc:HGNC:16370]	0.316231	0.1357	2.33037	0.0197867	0.067849	0.374915	0.135255	2.77191	0.00557287	0.0171581
ENSG00000070886	0.565721	EPHA8	EPH receptor A8 [Source:HGNC Symbol;Acc:HGNC:3391]	0.188406	1.8313	0.102881	0.918057	NA	-0.750103	1.96278	-0.382163	0.702341	NA
ENSG00000070915	4.78591	SLC12A3	solute carrier family 12 member 3 [Source:HGNC Symbol;Acc:HGNC:10912]	-1.35776	0.686954	-1.97649	0.0480994	NA	-4.23289	1.13203	-3.73919	0.000184614	0.000745835
ENSG00000070950	782.769	RAD18	RAD18 E3 ubiquitin protein ligase [Source:HGNC Symbol;Acc:HGNC:18278]	0.321013	0.0659176	4.86991	1.11649e-06	1.51521e-05	0.523979	0.0653803	8.01433	1.10743e-15	1.36306e-14
ENSG00000070961	2196.14	ATP2B1	ATPase plasma membrane Ca2+ transporting 1 [Source:HGNC Symbol;Acc:HGNC:814]	0.18406	0.0464133	3.96568	7.31882e-05	0.00062521	0.270115	0.0462754	5.83712	5.31104e-09	3.75668e-08
ENSG00000070985	4.30467	TRPM5	transient receptor potential cation channel subfamily M member 5 [Source:HGNC Symbol;Acc:HGNC:14323]	-0.0132347	0.773658	-0.0171067	0.986352	NA	0.1279	0.764264	0.167351	0.867094	0.925599
ENSG00000071051	510.832	NCK2	NCK adaptor protein 2 [Source:HGNC Symbol;Acc:HGNC:7665]	-0.0707103	0.0664716	-1.06377	0.287434	0.477995	0.140815	0.065313	2.156	0.0310836	0.0776024
ENSG00000071054	3267.18	MAP4K4	mitogen-activated protein kinase kinase kinase kinase 4 [Source:HGNC Symbol;Acc:HGNC:6866]	-0.00476274	0.0307194	-0.15504	0.876789	0.936412	0.0959672	0.030565	3.13977	0.0016908	0.00580648
ENSG00000071073	194.038	MGAT4A	alpha-1,3-mannosyl-glycoprotein 4-beta-N-acetylglucosaminyltransferase A [Source:HGNC Symbol;Acc:HGNC:7047]	0.0597379	0.110869	0.538817	0.590013	0.752546	0.45801	0.107618	4.25588	2.08233e-05	9.70451e-05
ENSG00000071082	12112.7	RPL31	ribosomal protein L31 [Source:HGNC Symbol;Acc:HGNC:10334]	-0.145254	0.047832	-3.03675	0.00239145	0.0122973	0.0786277	0.0477636	1.64618	0.0997259	0.204417
ENSG00000071127	6561.68	WDR1	WD repeat domain 1 [Source:HGNC Symbol;Acc:HGNC:12754]	-0.0264988	0.0271669	-0.97541	0.329357	0.523883	0.175254	0.0269794	6.49586	8.25579e-11	6.83003e-10
ENSG00000071189	1325.86	SNX13	sorting nexin 13 [Source:HGNC Symbol;Acc:HGNC:21335]	-0.0556885	0.0476853	-1.16783	0.242874	0.428751	0.0215122	0.0475074	0.452819	0.650679	0.784373
ENSG00000071203	0.281598	MS4A12	membrane spanning 4-domains A12 [Source:HGNC Symbol;Acc:HGNC:13370]	0.224927	3.19461	0.0704083	0.943869	NA	1.53778	3.14061	0.489643	0.624387	NA
ENSG00000071205	809.606	ARHGAP10	Rho GTPase activating protein 10 [Source:HGNC Symbol;Acc:HGNC:26099]	0.122531	0.0534482	2.29252	0.0218758	0.0735563	0.0512744	0.0538629	0.951943	0.341126	0.5135
ENSG00000071242	1265.67	RPS6KA2	ribosomal protein S6 kinase A2 [Source:HGNC Symbol;Acc:HGNC:10431]	-0.404066	0.0505721	-7.98991	1.35041e-15	7.83121e-14	-0.656838	0.051508	-12.7521	3.03302e-37	1.16051e-35
ENSG00000071243	434.813	ING3	inhibitor of growth family member 3 [Source:HGNC Symbol;Acc:HGNC:14587]	0.498505	0.067183	7.4201	1.17029e-13	5.40552e-12	0.988876	0.0648577	15.2469	1.72768e-52	1.32211e-50
ENSG00000071246	34.7849	VASH1	vasohibin 1 [Source:HGNC Symbol;Acc:HGNC:19964]	-0.0184662	0.225029	-0.0820615	0.934598	0.968818	-0.320978	0.233604	-1.37403	0.169434	0.31067
ENSG00000071282	3.17815	LMCD1	LIM and cysteine rich domains 1 [Source:HGNC Symbol;Acc:HGNC:6633]	0.291313	0.782517	0.372277	0.709686	NA	-0.86582	0.882065	-0.981583	0.326305	0.498401
ENSG00000071462	1995.74	BUD23	BUD23 rRNA methyltransferase and ribosome maturation factor [Source:HGNC Symbol;Acc:HGNC:16405]	-0.0824114	0.0371984	-2.21545	0.026729	0.0856732	0.0587633	0.0368934	1.59279	0.111208	0.223782
ENSG00000071537	2403.16	SEL1L	SEL1L adaptor subunit of ERAD E3 ubiquitin ligase [Source:HGNC Symbol;Acc:HGNC:10717]	-0.34521	0.0443013	-7.79231	6.57969e-15	3.52094e-13	-0.416221	0.0444667	-9.36029	7.95204e-21	1.37106e-19
ENSG00000071539	954.194	TRIP13	thyroid hormone receptor interactor 13 [Source:HGNC Symbol;Acc:HGNC:12307]	-0.0833946	0.0482428	-1.72864	0.0838728	0.203109	-0.673173	0.0508071	-13.2496	4.53718e-40	1.97181e-38
ENSG00000071553	4674.57	ATP6AP1	ATPase H+ transporting accessory protein 1 [Source:HGNC Symbol;Acc:HGNC:868]	-0.0915303	0.0298158	-3.06986	0.00214158	0.0112318	0.0248509	0.0296717	0.837528	0.402296	0.574114
ENSG00000071564	1627.53	TCF3	transcription factor 3 [Source:HGNC Symbol;Acc:HGNC:11633]	0.239586	0.0472676	5.06872	4.00507e-07	5.8908e-06	0.406296	0.0469338	8.65679	4.85217e-18	7.05318e-17
ENSG00000071575	2.41266	TRIB2	tribbles pseudokinase 2 [Source:HGNC Symbol;Acc:HGNC:30809]	-0.701017	0.820007	-0.854892	0.392611	NA	-1.52338	0.925138	-1.64665	0.0996295	0.204279
ENSG00000071626	4023.57	DAZAP1	DAZ associated protein 1 [Source:HGNC Symbol;Acc:HGNC:2683]	0.0422502	0.0406972	1.03816	0.299196	0.491826	-0.020698	0.0407868	-0.507468	0.611827	0.756694
ENSG00000071655	2067.44	MBD3	methyl-CpG binding domain protein 3 [Source:HGNC Symbol;Acc:HGNC:6918]	0.00758906	0.0423941	0.179012	0.857928	0.925643	0.0639002	0.0423089	1.51033	0.13096	0.254416
ENSG00000071677	0.185293	PRLH	prolactin releasing hormone [Source:HGNC Symbol;Acc:HGNC:17945]	0.946209	4.31394	0.219337	0.826387	NA	0.962614	4.31394	0.22314	0.823426	NA
ENSG00000071794	1561.71	HLTF	helicase like transcription factor [Source:HGNC Symbol;Acc:HGNC:11099]	-0.0114908	0.0395421	-0.290598	0.771359	0.875435	0.117493	0.0392212	2.99566	0.00273856	0.00903883
ENSG00000071859	1667.71	FAM50A	family with sequence similarity 50 member A [Source:HGNC Symbol;Acc:HGNC:18786]	0.0556767	0.0394481	1.41139	0.158129	0.319706	0.33946	0.0387135	8.76853	1.81017e-18	2.69055e-17
ENSG00000071889	1258.9	FAM3A	family with sequence similarity 3 member A [Source:HGNC Symbol;Acc:HGNC:13749]	-0.00590298	0.0539569	-0.109402	0.912884	0.95831	-0.00510409	0.0540001	-0.0945199	0.924696	0.958243
ENSG00000071894	1514.63	CPSF1	cleavage and polyadenylation specific factor 1 [Source:HGNC Symbol;Acc:HGNC:2324]	-0.0438428	0.0475984	-0.921098	0.356999	0.5518	-0.0743091	0.0477206	-1.55717	0.11943	0.236741
ENSG00000071909	1.05983	MYO3B	myosin IIIB [Source:HGNC Symbol;Acc:HGNC:15576]	-0.5361	1.40066	-0.38275	0.701906	NA	-1.07392	1.51303	-0.709784	0.477838	NA
ENSG00000071967	0.456268	CYBRD1	cytochrome b reductase 1 [Source:HGNC Symbol;Acc:HGNC:20797]	-0.536015	2.01308	-0.266266	0.790035	NA	-1.09629	2.09493	-0.523307	0.60076	NA
ENSG00000071991	0	CDH19	cadherin 19 [Source:HGNC Symbol;Acc:HGNC:1758]	NA	NA	NA	NA	NA	NA	NA	NA	NA	NA
ENSG00000071994	2362.96	PDCD2	programmed cell death 2 [Source:HGNC Symbol;Acc:HGNC:8762]	0.0729085	0.029181	2.49849	0.0124723	0.0471798	-0.207705	0.0300422	-6.91377	4.71946e-12	4.38538e-11
ENSG00000072041	0	SLC6A15	solute carrier family 6 member 15 [Source:HGNC Symbol;Acc:HGNC:13621]	NA	NA	NA	NA	NA	NA	NA	NA	NA	NA
ENSG00000072042	7049.68	RDH11	retinol dehydrogenase 11 [Source:HGNC Symbol;Acc:HGNC:17964]	0.0159154	0.0293291	0.542648	0.587372	0.75107	0.220132	0.0291608	7.54891	4.38923e-14	4.81334e-13
ENSG00000072062	1945.65	PRKACA	protein kinase cAMP-activated catalytic subunit alpha [Source:HGNC Symbol;Acc:HGNC:9380]	0.134825	0.0407353	3.30979	0.000933643	0.00564042	0.198332	0.0406254	4.88197	1.05032e-06	5.78154e-06
ENSG00000072071	3455.19	ADGRL1	adhesion G protein-coupled receptor L1 [Source:HGNC Symbol;Acc:HGNC:20973]	0.132894	0.0412346	3.22288	0.00126911	0.00725425	-0.0949896	0.0415673	-2.2852	0.0223011	0.058115
ENSG00000072080	0	SPP2	secreted phosphoprotein 2 [Source:HGNC Symbol;Acc:HGNC:11256]	NA	NA	NA	NA	NA	NA	NA	NA	NA	NA
ENSG00000072110	2286.06	ACTN1	actinin alpha 1 [Source:HGNC Symbol;Acc:HGNC:163]	0.0695645	0.0361557	1.92403	0.0543513	0.146705	-0.0941467	0.036558	-2.57527	0.0100161	0.0288373
ENSG00000072121	678.095	ZFYVE26	zinc finger FYVE-type containing 26 [Source:HGNC Symbol;Acc:HGNC:20761]	-0.0656395	0.060132	-1.09159	0.275013	0.464708	0.167015	0.0591284	2.82462	0.00473366	0.0148511
ENSG00000072133	1423.3	RPS6KA6	ribosomal protein S6 kinase A6 [Source:HGNC Symbol;Acc:HGNC:10435]	-0.187439	0.0556266	-3.36959	0.000752795	0.00472717	-0.234235	0.0557939	-4.19822	2.69018e-05	0.000123494
ENSG00000072134	620.095	EPN2	epsin 2 [Source:HGNC Symbol;Acc:HGNC:18639]	0.300416	0.0595655	5.04346	4.57193e-07	6.66499e-06	0.299093	0.0596376	5.01517	5.29855e-07	3.02706e-06
ENSG00000072135	1460.69	PTPN18	protein tyrosine phosphatase non-receptor type 18 [Source:HGNC Symbol;Acc:HGNC:9649]	-0.0217373	0.0400192	-0.543173	0.587011	0.750817	-0.338559	0.0411164	-8.23417	1.80809e-16	2.34286e-15
ENSG00000072163	1.76667	LIMS2	LIM zinc finger domain containing 2 [Source:HGNC Symbol;Acc:HGNC:16084]	0.61235	1.0039	0.609974	0.541879	NA	-2.28059	1.34911	-1.69044	0.0909437	0.19003
ENSG00000072182	0.276257	ASIC4	acid sensing ion channel subunit family member 4 [Source:HGNC Symbol;Acc:HGNC:21263]	0.952644	3.20409	0.297321	0.766221	NA	0.241331	3.20829	0.0752211	0.940039	NA
ENSG00000072195	2.43576	SPEG	striated muscle enriched protein kinase [Source:HGNC Symbol;Acc:HGNC:16901]	0.0302722	0.886016	0.0341666	0.972744	NA	-1.76387	1.23479	-1.42848	0.153155	0.287128
ENSG00000072201	17.7308	LNX1	ligand of numb-protein X 1 [Source:HGNC Symbol;Acc:HGNC:6657]	-0.313425	0.302871	-1.03485	0.30074	NA	-0.722429	0.319007	-2.26462	0.0235359	0.0609941
ENSG00000072210	4016.72	ALDH3A2	aldehyde dehydrogenase 3 family member A2 [Source:HGNC Symbol;Acc:HGNC:403]	-0.116003	0.0311389	-3.72533	0.000195062	0.00147574	-0.129201	0.0311867	-4.14282	3.43057e-05	0.000155121
ENSG00000072274	10227.2	TFRC	transferrin receptor [Source:HGNC Symbol;Acc:HGNC:11763]	-0.00196284	0.0384664	-0.0510274	0.959304	0.980797	-0.378015	0.0386594	-9.77808	1.39843e-22	2.64424e-21
ENSG00000072310	7467.52	SREBF1	sterol regulatory element binding transcription factor 1 [Source:HGNC Symbol;Acc:HGNC:11289]	0.0703165	0.0369699	1.902	0.0571716	0.152165	0.446547	0.0367146	12.1627	4.91343e-34	1.64987e-32
ENSG00000072315	0.188751	TRPC5	transient receptor potential cation channel subfamily C member 5 [Source:HGNC Symbol;Acc:HGNC:12337]	0.946212	4.28473	0.220834	0.825222	NA	0	4.28473	0	1	NA
ENSG00000072364	5173.76	AFF4	AF4/FMR2 family member 4 [Source:HGNC Symbol;Acc:HGNC:17869]	-0.0403106	0.0361285	-1.11576	0.264526	0.453179	0.180629	0.0359266	5.02773	4.96331e-07	2.84864e-06
ENSG00000072401	443.967	UBE2D1	ubiquitin conjugating enzyme E2 D1 [Source:HGNC Symbol;Acc:HGNC:12474]	-0.0853384	0.0746582	-1.14305	0.253016	0.439755	0.0732655	0.0739503	0.99074	0.321813	0.49361
ENSG00000072415	2941.15	MPP5	membrane palmitoylated protein 5 [Source:HGNC Symbol;Acc:HGNC:18669]	0.181741	0.0492376	3.6911	0.000223284	0.00166021	0.257627	0.0491625	5.24032	1.60301e-07	9.73467e-07
ENSG00000072422	2.17908	RHOBTB1	Rho related BTB domain containing 1 [Source:HGNC Symbol;Acc:HGNC:18738]	-0.860044	1.06981	-0.803924	0.421441	NA	0.12956	0.988458	0.131073	0.895717	0.943164
ENSG00000072501	4140.38	SMC1A	structural maintenance of chromosomes 1A [Source:HGNC Symbol;Acc:HGNC:11111]	-0.0551082	0.034965	-1.5761	0.115004	0.25414	0.215815	0.0346622	6.22623	4.77787e-10	3.71278e-09
ENSG00000072506	2450.32	HSD17B10	hydroxysteroid 17-beta dehydrogenase 10 [Source:HGNC Symbol;Acc:HGNC:4800]	-0.0532734	0.042042	-1.26715	0.205102	0.382203	0.0558063	0.0418702	1.33284	0.182585	0.328706
ENSG00000072518	2402.54	MARK2	microtubule affinity regulating kinase 2 [Source:HGNC Symbol;Acc:HGNC:3332]	0.289638	0.0285092	10.1595	3.00744e-24	3.80672e-22	0.373743	0.028335	13.1902	9.99819e-40	4.2834e-38
ENSG00000072571	1633.65	HMMR	hyaluronan mediated motility receptor [Source:HGNC Symbol;Acc:HGNC:5012]	-0.044952	0.0603475	-0.744886	0.456341	0.646221	0.0158568	0.0602696	0.263097	0.792476	0.880061
ENSG00000072609	682.838	CHFR	checkpoint with forkhead and ring finger domains [Source:HGNC Symbol;Acc:HGNC:20455]	0.074242	0.0542839	1.36766	0.171418	0.337402	-0.146304	0.05548	-2.63705	0.00836295	0.0245974
ENSG00000072657	0.387906	TRHDE	thyrotropin releasing hormone degrading enzyme [Source:HGNC Symbol;Acc:HGNC:30748]	0.946254	2.56119	0.369459	0.711785	NA	0.962659	2.56119	0.375864	0.707018	NA
ENSG00000072682	203.95	P4HA2	prolyl 4-hydroxylase subunit alpha 2 [Source:HGNC Symbol;Acc:HGNC:8547]	0.00127167	0.0940906	0.0135154	0.989217	0.994125	0.0292447	0.0939759	0.311194	0.755653	0.856526
ENSG00000072694	0	FCGR2B	Fc fragment of IgG receptor IIb [Source:HGNC Symbol;Acc:HGNC:3618]	NA	NA	NA	NA	NA	NA	NA	NA	NA	NA
ENSG00000072736	505.172	NFATC3	nuclear factor of activated T cells 3 [Source:HGNC Symbol;Acc:HGNC:7777]	-0.0466154	0.0609979	-0.764213	0.444741	0.63533	0.0616315	0.0604528	1.0195	0.307966	0.478875
ENSG00000072756	688.803	TRNT1	tRNA nucleotidyl transferase 1 [Source:HGNC Symbol;Acc:HGNC:17341]	0.0964494	0.0553523	1.74246	0.0814272	0.198722	-0.196176	0.0569039	-3.44751	0.000565788	0.00211318
ENSG00000072778	10149.9	ACADVL	acyl-CoA dehydrogenase very long chain [Source:HGNC Symbol;Acc:HGNC:92]	-0.160317	0.0297112	-5.39584	6.82045e-08	1.18226e-06	-0.150829	0.0297149	-5.07586	3.85737e-07	2.24254e-06
ENSG00000072786	234.334	STK10	serine/threonine kinase 10 [Source:HGNC Symbol;Acc:HGNC:11388]	-0.0800952	0.0850914	-0.941285	0.346559	0.541628	-0.791442	0.092624	-8.54467	1.28902e-17	1.81866e-16
ENSG00000072803	2547.52	FBXW11	F-box and WD repeat domain containing 11 [Source:HGNC Symbol;Acc:HGNC:13607]	0.0392254	0.0357734	1.0965	0.272861	0.462581	0.368607	0.0352024	10.4711	1.17324e-25	2.57589e-24
ENSG00000072818	119.436	ACAP1	ArfGAP with coiled-coil, ankyrin repeat and PH domains 1 [Source:HGNC Symbol;Acc:HGNC:16467]	0.0174687	0.126086	0.138546	0.889809	0.94547	-0.62376	0.135456	-4.60489	4.12677e-06	2.11198e-05
ENSG00000072832	75.6499	CRMP1	collapsin response mediator protein 1 [Source:HGNC Symbol;Acc:HGNC:2365]	-0.0163803	0.153358	-0.106811	0.914939	0.959472	-0.380594	0.160147	-2.37653	0.0174765	0.0469322
ENSG00000072840	301.705	EVC	EvC ciliary complex subunit 1 [Source:HGNC Symbol;Acc:HGNC:3497]	0.0469026	0.0857506	0.546965	0.584403	0.748888	-0.246969	0.0881501	-2.80169	0.0050836	0.0158014
ENSG00000072849	835.543	DERL2	derlin 2 [Source:HGNC Symbol;Acc:HGNC:17943]	-0.0900167	0.050869	-1.76958	0.0767972	0.190065	0.24675	0.0495167	4.98318	6.25481e-07	3.53608e-06
ENSG00000072858	21.8382	SIDT1	SID1 transmembrane family member 1 [Source:HGNC Symbol;Acc:HGNC:25967]	0.0977554	0.269616	0.362573	0.716924	NA	-0.789132	0.302837	-2.6058	0.00916604	0.0267102
ENSG00000072864	447.333	NDE1	nudE neurodevelopment protein 1 [Source:HGNC Symbol;Acc:HGNC:17619]	0.195849	0.0760145	2.57646	0.00998165	0.0392586	0.131856	0.0764079	1.72568	0.0844047	0.179059
ENSG00000072952	0.912552	MRVI1	murine retrovirus integration site 1 homolog [Source:HGNC Symbol;Acc:HGNC:7237]	-0.470904	1.63862	-0.287378	0.773823	NA	-1.07746	1.69347	-0.636246	0.524616	NA
ENSG00000072954	100.636	TMEM38A	transmembrane protein 38A [Source:HGNC Symbol;Acc:HGNC:28462]	-0.11501	0.137531	-0.836243	0.403018	0.597355	-0.536777	0.145465	-3.69008	0.000224187	0.000892397
ENSG00000072958	922.731	AP1M1	adaptor related protein complex 1 subunit mu 1 [Source:HGNC Symbol;Acc:HGNC:13667]	0.0932534	0.047685	1.95561	0.0505109	0.13922	0.0864204	0.0477781	1.80879	0.0704843	0.154426
ENSG00000073008	960.86	PVR	PVR cell adhesion molecule [Source:HGNC Symbol;Acc:HGNC:9705]	0.210235	0.0436269	4.81893	1.44331e-06	1.90761e-05	-0.135821	0.0451517	-3.00811	0.00262877	0.00870937
ENSG00000073050	211.572	XRCC1	X-ray repair cross complementing 1 [Source:HGNC Symbol;Acc:HGNC:12828]	-0.160355	0.0959282	-1.67162	0.0946	0.220722	0.1996	0.0927542	2.15192	0.0314034	0.0783267
ENSG00000073060	2075.9	SCARB1	scavenger receptor class B member 1 [Source:HGNC Symbol;Acc:HGNC:1664]	0.0896298	0.0431946	2.07503	0.0379841	0.111513	-0.519287	0.0445879	-11.6464	2.3949e-31	7.01562e-30
ENSG00000073067	5.70412	CYP2W1	cytochrome P450 family 2 subfamily W member 1 [Source:HGNC Symbol;Acc:HGNC:20243]	0.0966847	0.581293	0.166327	0.8679	NA	-0.245559	0.604064	-0.406512	0.684367	0.806762
ENSG00000073111	2149.04	MCM2	minichromosome maintenance complex component 2 [Source:HGNC Symbol;Acc:HGNC:6944]	0.0537167	0.0494856	1.0855	0.2777	0.467558	0.17089	0.0493273	3.4644	0.000531406	0.00199357
ENSG00000073146	4.10482	MOV10L1	Mov10 like RISC complex RNA helicase 1 [Source:HGNC Symbol;Acc:HGNC:7201]	-1.07685	0.776272	-1.38721	0.165377	NA	-0.900495	0.760452	-1.18416	0.236351	0.395654
ENSG00000073150	425.169	PANX2	pannexin 2 [Source:HGNC Symbol;Acc:HGNC:8600]	0.00211185	0.0849889	0.0248486	0.980176	0.99082	-0.144288	0.0859287	-1.67916	0.0931212	0.193642
ENSG00000073169	533.514	SELENOO	selenoprotein O [Source:HGNC Symbol;Acc:HGNC:30395]	0.173771	0.0687497	2.52758	0.0114852	0.0440917	0.0742224	0.0693247	1.07065	0.284327	0.452103
ENSG00000073282	0.0597013	TP63	tumor protein p63 [Source:HGNC Symbol;Acc:HGNC:15979]	0	5.94781	0	1	NA	0	5.94781	0	1	NA
ENSG00000073331	158.133	ALPK1	alpha kinase 1 [Source:HGNC Symbol;Acc:HGNC:20917]	-0.348173	0.113745	-3.06099	0.00220605	0.011483	-0.763766	0.118882	-6.42458	1.32234e-10	1.07461e-09
ENSG00000073350	1207.66	LLGL2	LLGL scribble cell polarity complex component 2 [Source:HGNC Symbol;Acc:HGNC:6629]	-0.169909	0.0505516	-3.36109	0.000776342	0.00484349	-0.464573	0.0517708	-8.97365	2.8686e-19	4.50802e-18
ENSG00000073417	498.487	PDE8A	phosphodiesterase 8A [Source:HGNC Symbol;Acc:HGNC:8793]	0.0973228	0.0641226	1.51776	0.129075	0.277048	-0.194447	0.0658752	-2.95175	0.00315976	0.0102863
ENSG00000073464	283.213	CLCN4	chloride voltage-gated channel 4 [Source:HGNC Symbol;Acc:HGNC:2022]	-0.244515	0.0800137	-3.05591	0.00224375	0.0116516	-0.384071	0.0814349	-4.71629	2.40185e-06	1.26318e-05
ENSG00000073536	1263.13	NLE1	notchless homolog 1 [Source:HGNC Symbol;Acc:HGNC:19889]	0.258718	0.0455803	5.67611	1.37795e-08	2.76093e-07	0.143173	0.0459747	3.11417	0.00184464	0.00628904
ENSG00000073578	92.8641	SDHA	succinate dehydrogenase complex flavoprotein subunit A [Source:HGNC Symbol;Acc:HGNC:10680]	0.0605876	0.149507	0.405248	0.685295	0.819739	0.0158856	0.150327	0.105674	0.915841	0.953765
ENSG00000073584	278.805	SMARCE1	SWI/SNF related, matrix associated, actin dependent regulator of chromatin, subfamily e, member 1 [Source:HGNC Symbol;Acc:HGNC:11109]	-0.195984	0.0854141	-2.29451	0.021761	0.0733014	-0.207218	0.0856545	-2.41923	0.0155533	0.0424429
ENSG00000073598	2.53184	FNDC8	fibronectin type III domain containing 8 [Source:HGNC Symbol;Acc:HGNC:25286]	0.422587	0.92612	0.456298	0.648176	NA	-0.634624	1.01956	-0.622447	0.533648	0.691343
ENSG00000073605	34.1115	GSDMB	gasdermin B [Source:HGNC Symbol;Acc:HGNC:23690]	-0.294177	0.227436	-1.29345	0.195855	0.369058	-0.324878	0.228756	-1.42019	0.155551	0.290755
ENSG00000073614	852.003	KDM5A	lysine demethylase 5A [Source:HGNC Symbol;Acc:HGNC:9886]	0.0372315	0.0503766	0.739064	0.459868	0.649539	0.126393	0.0500601	2.52482	0.0115758	0.0328091
ENSG00000073670	166.353	ADAM11	ADAM metallopeptidase domain 11 [Source:HGNC Symbol;Acc:HGNC:189]	-0.0562195	0.105731	-0.531723	0.594918	0.755992	-0.563385	0.112223	-5.02022	5.16113e-07	2.95255e-06
ENSG00000073711	377.7	PPP2R3A	protein phosphatase 2 regulatory subunit B''alpha [Source:HGNC Symbol;Acc:HGNC:9307]	0.218324	0.0778351	2.80496	0.00503224	0.022702	0.351676	0.0771137	4.56049	5.10345e-06	2.57563e-05
ENSG00000073712	323.002	FERMT2	fermitin family member 2 [Source:HGNC Symbol;Acc:HGNC:15767]	0.259338	0.0738616	3.51114	0.000446191	0.0030448	0.700088	0.0708863	9.87622	5.27892e-23	1.01637e-21
ENSG00000073734	10.7961	ABCB11	ATP binding cassette subfamily B member 11 [Source:HGNC Symbol;Acc:HGNC:42]	-0.0331251	0.541367	-0.0611879	0.95121	NA	1.1541	0.487534	2.36721	0.0179225	0.0479835
ENSG00000073737	0.152437	DHRS9	dehydrogenase/reductase 9 [Source:HGNC Symbol;Acc:HGNC:16888]	-0.496406	4.54914	-0.109121	0.913107	NA	-0.480001	4.54914	-0.105515	0.915967	NA
ENSG00000073754	0.124045	CD5L	CD5 molecule like [Source:HGNC Symbol;Acc:HGNC:1690]	1.55095	5.91785	0.26208	0.793259	NA	-0.479991	5.94781	-0.0807005	0.93568	NA
ENSG00000073756	0.665364	PTGS2	prostaglandin-endoperoxide synthase 2 [Source:HGNC Symbol;Acc:HGNC:9605]	0.631966	1.78855	0.353341	0.723833	NA	-1.03243	1.92463	-0.536431	0.591661	NA
ENSG00000073792	1.88276	IGF2BP2	insulin like growth factor 2 mRNA binding protein 2 [Source:HGNC Symbol;Acc:HGNC:28867]	-2.09632	1.28005	-1.63768	0.101488	NA	-0.0809969	0.940425	-0.0861279	0.931365	0.962478
ENSG00000073803	1153.03	MAP3K13	mitogen-activated protein kinase kinase kinase 13 [Source:HGNC Symbol;Acc:HGNC:6852]	-0.0218475	0.048006	-0.455099	0.649038	0.795007	-0.0465363	0.0481499	-0.966487	0.333801	0.506771
ENSG00000073849	43.271	ST6GAL1	ST6 beta-galactoside alpha-2,6-sialyltransferase 1 [Source:HGNC Symbol;Acc:HGNC:10860]	-0.207616	0.199004	-1.04328	0.29682	0.489151	-0.529318	0.207123	-2.55557	0.0106013	0.0303279
ENSG00000073861	0	TBX21	T-box transcription factor 21 [Source:HGNC Symbol;Acc:HGNC:11599]	NA	NA	NA	NA	NA	NA	NA	NA	NA	NA
ENSG00000073905	149.305	VDAC1P1	voltage dependent anion channel 1 pseudogene 1 [Source:HGNC Symbol;Acc:HGNC:12671]	-0.136462	0.113712	-1.20007	0.230113	0.414223	-0.0789	0.113242	-0.696739	0.485966	0.650904
ENSG00000073910	168.434	FRY	FRY microtubule binding protein [Source:HGNC Symbol;Acc:HGNC:20367]	-0.343063	0.110748	-3.09769	0.00195033	0.0103917	0.461318	0.104159	4.42897	9.46825e-06	4.61525e-05
ENSG00000073921	3000.79	PICALM	phosphatidylinositol binding clathrin assembly protein [Source:HGNC Symbol;Acc:HGNC:15514]	0.130724	0.0388541	3.36449	0.000766865	0.00479698	0.529003	0.0382924	13.8148	2.07462e-43	1.06097e-41
ENSG00000073969	2313.13	NSF	N-ethylmaleimide sensitive factor, vesicle fusing ATPase [Source:HGNC Symbol;Acc:HGNC:8016]	0.00131187	0.044814	0.0292737	0.976646	0.989043	0.0389898	0.0447733	0.870828	0.383848	0.556702
ENSG00000074047	0.654793	GLI2	GLI family zinc finger 2 [Source:HGNC Symbol;Acc:HGNC:4318]	0.224927	2.02394	0.111133	0.911511	NA	1.55195	1.93582	0.8017	0.422726	NA
ENSG00000074054	1152.4	CLASP1	cytoplasmic linker associated protein 1 [Source:HGNC Symbol;Acc:HGNC:17088]	0.0877375	0.0467133	1.87821	0.0603522	0.15801	0.146557	0.046571	3.14695	0.00164983	0.00567342
ENSG00000074071	1626.11	MRPS34	mitochondrial ribosomal protein S34 [Source:HGNC Symbol;Acc:HGNC:16618]	0.0825934	0.0576235	1.43333	0.151764	0.310703	0.288218	0.0572655	5.03302	4.82806e-07	2.77479e-06
ENSG00000074181	419.547	NOTCH3	notch receptor 3 [Source:HGNC Symbol;Acc:HGNC:7883]	0.0843692	0.0796667	1.05903	0.289588	0.480306	0.0373924	0.0800902	0.466878	0.640587	0.77798
ENSG00000074201	1797.41	CLNS1A	chloride nucleotide-sensitive channel 1A [Source:HGNC Symbol;Acc:HGNC:2080]	-0.116574	0.037699	-3.09223	0.00198658	0.0105434	-0.181042	0.037933	-4.77267	1.81801e-06	9.67453e-06
ENSG00000074211	765.426	PPP2R2C	protein phosphatase 2 regulatory subunit Bgamma [Source:HGNC Symbol;Acc:HGNC:9306]	-0.0555577	0.0532079	-1.04416	0.296411	0.48866	-0.738817	0.0570403	-12.9525	2.27346e-38	9.18121e-37
ENSG00000074219	27.344	TEAD2	TEA domain transcription factor 2 [Source:HGNC Symbol;Acc:HGNC:11715]	-0.363371	0.254051	-1.43031	0.152629	0.312037	-0.324866	0.253311	-1.28248	0.199674	0.351091
ENSG00000074266	534.743	EED	embryonic ectoderm development [Source:HGNC Symbol;Acc:HGNC:3188]	0.144782	0.0573813	2.52316	0.0116305	0.0445424	0.611547	0.0549765	11.1238	9.61019e-29	2.45437e-27
ENSG00000074276	9.49505	CDHR2	cadherin related family member 2 [Source:HGNC Symbol;Acc:HGNC:18231]	0.458284	0.479778	0.9552	0.339477	NA	0.627991	0.474085	1.32464	0.185291	0.332106
ENSG00000074317	2.43567	SNCB	synuclein beta [Source:HGNC Symbol;Acc:HGNC:11140]	-1.144	0.969983	-1.17941	0.238236	NA	-0.285668	0.870343	-0.328225	0.742742	0.847741
ENSG00000074319	1757.7	TSG101	tumor susceptibility 101 [Source:HGNC Symbol;Acc:HGNC:15971]	-0.0303932	0.0423495	-0.717676	0.472957	0.66069	0.185822	0.0418445	4.44077	8.96367e-06	4.38143e-05
ENSG00000074356	1477.59	NCBP3	nuclear cap binding subunit 3 [Source:HGNC Symbol;Acc:HGNC:24612]	0.107535	0.0455904	2.35873	0.0183376	0.0640139	0.0329975	0.0458294	0.720008	0.47152	0.638273
ENSG00000074370	1.42598	ATP2A3	ATPase sarcoplasmic/endoplasmic reticulum Ca2+ transporting 3 [Source:HGNC Symbol;Acc:HGNC:813]	-1.37312	1.49762	-0.916867	0.359213	NA	-1.34579	1.50316	-0.895305	0.370624	0.543913
ENSG00000074410	598.799	CA12	carbonic anhydrase 12 [Source:HGNC Symbol;Acc:HGNC:1371]	-0.0173308	0.0647293	-0.267743	0.788897	0.886357	-0.774576	0.0696987	-11.1132	1.082e-28	2.76002e-27
ENSG00000074416	400.055	MGLL	monoglyceride lipase [Source:HGNC Symbol;Acc:HGNC:17038]	0.0740035	0.0686093	1.07862	0.280756	0.470652	-0.249253	0.0708038	-3.52034	0.000430996	0.00164019
ENSG00000074527	20.4047	NTN4	netrin 4 [Source:HGNC Symbol;Acc:HGNC:13658]	0.178074	0.30285	0.587993	0.556537	NA	0.250894	0.301473	0.832225	0.405282	0.576661
ENSG00000074582	809.472	BCS1L	BCS1 homolog, ubiquinol-cytochrome c reductase complex chaperone [Source:HGNC Symbol;Acc:HGNC:1020]	-0.0276978	0.0516451	-0.53631	0.591745	0.753796	0.0907892	0.0512062	1.77301	0.076227	0.164826
ENSG00000074590	116.674	NUAK1	NUAK family kinase 1 [Source:HGNC Symbol;Acc:HGNC:14311]	-0.219741	0.121825	-1.80375	0.0712712	0.179563	-0.871424	0.132581	-6.57276	4.93896e-11	4.16842e-10
ENSG00000074603	1159.01	DPP8	dipeptidyl peptidase 8 [Source:HGNC Symbol;Acc:HGNC:16490]	0.00978956	0.0486395	0.201267	0.840489	0.915987	0.0395529	0.0485938	0.81395	0.415674	0.58745
ENSG00000074621	265.432	SLC24A1	solute carrier family 24 member 1 [Source:HGNC Symbol;Acc:HGNC:10975]	-0.132265	0.0839895	-1.57478	0.115306	0.254723	-0.603551	0.0885433	-6.81645	9.33169e-12	8.44089e-11
ENSG00000074657	847.117	ZNF532	zinc finger protein 532 [Source:HGNC Symbol;Acc:HGNC:30940]	-0.012856	0.0529148	-0.242956	0.80804	0.898322	0.265815	0.0519872	5.1131	3.16921e-07	1.86143e-06
ENSG00000074660	14.8858	SCARF1	scavenger receptor class F member 1 [Source:HGNC Symbol;Acc:HGNC:16820]	-0.229606	0.362965	-0.632585	0.527005	NA	-0.925182	0.39274	-2.35571	0.0184874	0.0493153
ENSG00000074695	5267.74	LMAN1	lectin, mannose binding 1 [Source:HGNC Symbol;Acc:HGNC:6631]	-0.146643	0.0320974	-4.56869	4.90792e-06	5.73783e-05	-0.00296112	0.0319622	-0.0926446	0.926186	0.959061
ENSG00000074696	5462.65	HACD3	3-hydroxyacyl-CoA dehydratase 3 [Source:HGNC Symbol;Acc:HGNC:24175]	-0.0140145	0.0215186	-0.651273	0.51487	0.695371	0.00619844	0.0215121	0.288137	0.773242	0.868797
ENSG00000074706	16.5263	IPCEF1	interaction protein for cytohesin exchange factors 1 [Source:HGNC Symbol;Acc:HGNC:21204]	0.0826581	0.323351	0.25563	0.798237	NA	-0.325573	0.337704	-0.964077	0.335007	0.50791
ENSG00000074755	1858.33	ZZEF1	zinc finger ZZ-type and EF-hand domain containing 1 [Source:HGNC Symbol;Acc:HGNC:29027]	0.000474799	0.0391041	0.0121419	0.990312	0.994871	-0.0531597	0.0392779	-1.35342	0.17592	0.319704
ENSG00000074771	0	NOX3	NADPH oxidase 3 [Source:HGNC Symbol;Acc:HGNC:7890]	NA	NA	NA	NA	NA	NA	NA	NA	NA	NA
ENSG00000074800	29566.3	ENO1	enolase 1 [Source:HGNC Symbol;Acc:HGNC:3350]	0.00690042	0.0212661	0.32448	0.745575	0.859398	0.171857	0.0212236	8.09745	5.61238e-16	7.03914e-15
ENSG00000074803	0.59487	SLC12A1	solute carrier family 12 member 1 [Source:HGNC Symbol;Acc:HGNC:10910]	0.946259	2.05444	0.460593	0.645091	NA	2.2737	1.96763	1.15556	0.247863	NA
ENSG00000074842	3118.95	MYDGF	myeloid derived growth factor [Source:HGNC Symbol;Acc:HGNC:16948]	-0.129361	0.0507659	-2.54818	0.0108285	0.0420988	0.0500841	0.0505748	0.990298	0.322028	0.493833
ENSG00000074855	335.475	ANO8	anoctamin 8 [Source:HGNC Symbol;Acc:HGNC:29329]	-0.121323	0.0862179	-1.40716	0.159379	0.321444	-0.227817	0.0870652	-2.61663	0.00888027	0.0259923
ENSG00000074935	266.205	TUBE1	tubulin epsilon 1 [Source:HGNC Symbol;Acc:HGNC:20775]	-0.738158	0.0818936	-9.01363	1.99351e-19	1.6715e-17	-0.702549	0.0817007	-8.59905	8.03753e-18	1.14936e-16
ENSG00000074964	210.004	ARHGEF10L	Rho guanine nucleotide exchange factor 10 like [Source:HGNC Symbol;Acc:HGNC:25540]	-0.267084	0.0999477	-2.67224	0.00753474	0.0315495	-0.613285	0.10381	-5.90778	3.46753e-09	2.49532e-08
ENSG00000074966	6.8422	TXK	TXK tyrosine kinase [Source:HGNC Symbol;Acc:HGNC:12434]	-1.32876	0.560921	-2.36888	0.0178419	NA	-0.834075	0.518943	-1.60726	0.107998	0.218614
ENSG00000075035	0.181011	WSCD2	WSC domain containing 2 [Source:HGNC Symbol;Acc:HGNC:29117]	0.224929	4.34006	0.0518263	0.958667	NA	0.241334	4.34006	0.0556061	0.955656	NA
ENSG00000075043	70.3298	KCNQ2	potassium voltage-gated channel subfamily Q member 2 [Source:HGNC Symbol;Acc:HGNC:6296]	0.149981	0.145345	1.0319	0.30212	0.495035	-0.0924313	0.149334	-0.618956	0.535945	0.693227
ENSG00000075073	3.90717	TACR2	tachykinin receptor 2 [Source:HGNC Symbol;Acc:HGNC:11527]	-0.572139	0.668494	-0.855862	0.392074	NA	0.38318	0.596749	0.642112	0.5208	0.680219
ENSG00000075089	622.074	ACTR6	actin related protein 6 [Source:HGNC Symbol;Acc:HGNC:24025]	-0.0209338	0.0625178	-0.334846	0.737741	0.854972	-0.0600907	0.0628005	-0.956851	0.338642	0.511695
ENSG00000075131	568.234	TIPIN	TIMELESS interacting protein [Source:HGNC Symbol;Acc:HGNC:30750]	0.31853	0.0682701	4.66573	3.07519e-06	3.77629e-05	0.560203	0.0673341	8.31975	8.81484e-17	1.17167e-15
ENSG00000075142	669.043	SRI	sorcin [Source:HGNC Symbol;Acc:HGNC:11292]	-0.112958	0.056679	-1.99294	0.0462684	0.130117	0.096872	0.055695	1.73933	0.0819769	0.175016
ENSG00000075151	2436.61	EIF4G3	eukaryotic translation initiation factor 4 gamma 3 [Source:HGNC Symbol;Acc:HGNC:3298]	-0.0284653	0.0346216	-0.822183	0.410973	0.604272	0.196871	0.0341519	5.76456	8.18714e-09	5.67139e-08
ENSG00000075188	329.551	NUP37	nucleoporin 37 [Source:HGNC Symbol;Acc:HGNC:29929]	0.00944458	0.0890171	0.106098	0.915504	0.959625	0.202476	0.0879915	2.30109	0.0213865	0.055987
ENSG00000075213	0.178258	SEMA3A	semaphorin 3A [Source:HGNC Symbol;Acc:HGNC:10723]	-0.49641	4.89531	-0.101405	0.919229	NA	-0.480006	4.89531	-0.0980542	0.921889	NA
ENSG00000075218	1084.69	GTSE1	G2 and S-phase expressed 1 [Source:HGNC Symbol;Acc:HGNC:13698]	0.284934	0.0422009	6.75184	1.45984e-11	5.01758e-10	0.883032	0.0403371	21.8913	3.14273e-106	9.9071e-104
ENSG00000075223	4509.66	SEMA3C	semaphorin 3C [Source:HGNC Symbol;Acc:HGNC:10725]	-0.0107751	0.0498092	-0.216328	0.828732	0.909899	0.131531	0.0497172	2.64558	0.00815498	0.0240628
ENSG00000075234	839.629	TTC38	tetratricopeptide repeat domain 38 [Source:HGNC Symbol;Acc:HGNC:26082]	-0.0372257	0.0497808	-0.747793	0.454585	0.64446	-0.167367	0.0504851	-3.31517	0.000915881	0.00330164
ENSG00000075239	1911.06	ACAT1	acetyl-CoA acetyltransferase 1 [Source:HGNC Symbol;Acc:HGNC:93]	-0.24983	0.0393985	-6.3411	2.28124e-10	6.62485e-09	-0.565015	0.0404102	-13.982	2.00768e-44	1.07899e-42
ENSG00000075240	353.535	GRAMD4	GRAM domain containing 4 [Source:HGNC Symbol;Acc:HGNC:29113]	-0.017162	0.0878696	-0.195312	0.845149	0.917949	-0.16004	0.0889428	-1.79936	0.0719617	0.157161
ENSG00000075275	392.796	CELSR1	cadherin EGF LAG seven-pass G-type receptor 1 [Source:HGNC Symbol;Acc:HGNC:1850]	-0.00995191	0.0764637	-0.130152	0.896446	0.949012	-1.05419	0.0848252	-12.4279	1.84525e-35	6.52821e-34
ENSG00000075290	2.70126	WNT8B	Wnt family member 8B [Source:HGNC Symbol;Acc:HGNC:12789]	-0.647952	0.87488	-0.740619	0.458925	NA	0.364742	0.770102	0.473629	0.635765	0.774662
ENSG00000075292	1564.58	ZNF638	zinc finger protein 638 [Source:HGNC Symbol;Acc:HGNC:17894]	0.0645129	0.0500095	1.29001	0.197046	0.370791	0.370426	0.0493651	7.50382	6.19853e-14	6.70692e-13
ENSG00000075303	762.285	SLC25A40	solute carrier family 25 member 40 [Source:HGNC Symbol;Acc:HGNC:29680]	0.0982982	0.0569516	1.726	0.084348	0.203737	0.732324	0.0546455	13.4014	5.93727e-41	2.70845e-39
ENSG00000075336	1310.54	TIMM21	translocase of inner mitochondrial membrane 21 [Source:HGNC Symbol;Acc:HGNC:25010]	0.114601	0.0451693	2.53714	0.0111763	0.0431326	0.346765	0.044557	7.7825	7.11051e-15	8.24265e-14
ENSG00000075340	72.4307	ADD2	adducin 2 [Source:HGNC Symbol;Acc:HGNC:244]	0.36764	0.190774	1.9271	0.0539671	0.145967	0.874195	0.180987	4.83015	1.36431e-06	7.3754e-06
ENSG00000075388	0	FGF4	fibroblast growth factor 4 [Source:HGNC Symbol;Acc:HGNC:3682]	NA	NA	NA	NA	NA	NA	NA	NA	NA	NA
ENSG00000075391	355.571	RASAL2	RAS protein activator like 2 [Source:HGNC Symbol;Acc:HGNC:9874]	0.258774	0.0713837	3.62511	0.000288837	0.00208456	0.15349	0.0722124	2.12553	0.0335424	0.0828713
ENSG00000075399	195.992	VPS9D1	VPS9 domain containing 1 [Source:HGNC Symbol;Acc:HGNC:13526]	0.0395611	0.0934032	0.423552	0.671892	0.81122	-0.225402	0.0964091	-2.33797	0.0193887	0.0514135
ENSG00000075407	1063.09	ZNF37A	zinc finger protein 37A [Source:HGNC Symbol;Acc:HGNC:13102]	-0.161134	0.0572352	-2.8153	0.00487315	0.0221131	-0.332497	0.0578508	-5.74749	9.05785e-09	6.25199e-08
ENSG00000075413	1812.16	MARK3	microtubule affinity regulating kinase 3 [Source:HGNC Symbol;Acc:HGNC:6897]	0.028322	0.0355469	0.796749	0.425597	0.617634	0.0282428	0.0355951	0.793447	0.427517	0.598383
ENSG00000075415	10136.2	SLC25A3	solute carrier family 25 member 3 [Source:HGNC Symbol;Acc:HGNC:10989]	-0.00858507	0.0216544	-0.396458	0.691767	0.823217	0.154673	0.0215321	7.18335	6.80223e-13	6.78328e-12
ENSG00000075420	997.02	FNDC3B	fibronectin type III domain containing 3B [Source:HGNC Symbol;Acc:HGNC:24670]	0.068626	0.0489552	1.40181	0.160971	0.323257	0.0328162	0.0491437	0.667761	0.504286	0.66648
ENSG00000075426	877.706	FOSL2	FOS like 2, AP-1 transcription factor subunit [Source:HGNC Symbol;Acc:HGNC:3798]	0.0125791	0.0502119	0.250521	0.802184	0.894437	0.16992	0.0495331	3.43044	0.000602605	0.00223968
ENSG00000075429	1.19178	CACNG5	calcium voltage-gated channel auxiliary subunit gamma 5 [Source:HGNC Symbol;Acc:HGNC:1409]	0.201434	1.25606	0.160369	0.87259	NA	-1.22925	1.38045	-0.890475	0.373211	NA
ENSG00000075461	11.0204	CACNG4	calcium voltage-gated channel auxiliary subunit gamma 4 [Source:HGNC Symbol;Acc:HGNC:1408]	0.142813	0.348097	0.410268	0.681609	NA	-0.334314	0.366079	-0.91323	0.361121	0.534158
ENSG00000075539	1116.02	FRYL	FRY like transcription coactivator [Source:HGNC Symbol;Acc:HGNC:29127]	0.0818345	0.0576473	1.41957	0.155732	0.31644	0.441417	0.0568284	7.76754	8.00273e-15	9.23133e-14
ENSG00000075568	1562.84	TMEM131	transmembrane protein 131 [Source:HGNC Symbol;Acc:HGNC:30366]	0.013987	0.0417399	0.335098	0.737551	0.854827	0.111201	0.0415151	2.67856	0.0073939	0.0220637
ENSG00000075618	96.6428	FSCN1	fascin actin-bundling protein 1 [Source:HGNC Symbol;Acc:HGNC:11148]	0.017501	0.163182	0.107249	0.914592	0.959185	0.00998503	0.16344	0.0610928	0.951285	0.973289
ENSG00000075624	48169.5	ACTB	actin beta [Source:HGNC Symbol;Acc:HGNC:132]	0.109812	0.0193947	5.66195	1.4966e-08	2.9537e-07	0.44878	0.019336	23.2096	3.63965e-119	1.37273e-116
ENSG00000075643	616.109	MOCOS	molybdenum cofactor sulfurase [Source:HGNC Symbol;Acc:HGNC:18234]	-0.611158	0.0539786	-11.3222	1.01864e-29	1.83689e-27	-0.985065	0.0566348	-17.3933	9.27673e-68	1.18748e-65
ENSG00000075651	17.2672	PLD1	phospholipase D1 [Source:HGNC Symbol;Acc:HGNC:9067]	0.78632	0.482393	1.63004	0.103093	NA	-0.418969	0.576013	-0.727361	0.467005	0.633908
ENSG00000075673	6.27643	ATP12A	ATPase H+/K+ transporting non-gastric alpha2 subunit [Source:HGNC Symbol;Acc:HGNC:13816]	0.366417	0.548859	0.667597	0.504391	NA	0.244139	0.557518	0.437903	0.661456	0.791447
ENSG00000075702	598.095	WDR62	WD repeat domain 62 [Source:HGNC Symbol;Acc:HGNC:24502]	0.205148	0.0654624	3.13383	0.00172538	0.00939716	0.539817	0.0641682	8.41252	4.0128e-17	5.46449e-16
ENSG00000075711	1332.31	DLG1	discs large MAGUK scaffold protein 1 [Source:HGNC Symbol;Acc:HGNC:2900]	-0.0825261	0.0483345	-1.7074	0.0877482	0.209245	-0.0112758	0.0481707	-0.234079	0.814924	0.893467
ENSG00000075785	6944.69	RAB7A	RAB7A, member RAS oncogene family [Source:HGNC Symbol;Acc:HGNC:9788]	-0.0445563	0.0250417	-1.77928	0.0751934	0.187046	0.156392	0.0248281	6.29897	2.99639e-10	2.37474e-09
ENSG00000075790	15.2506	BCAP29	B cell receptor associated protein 29 [Source:HGNC Symbol;Acc:HGNC:24131]	-0.340295	0.32049	-1.0618	0.288328	NA	-0.372227	0.322448	-1.15438	0.248345	0.410264
ENSG00000075826	31.0844	SEC31B	SEC31 homolog B, COPII coat complex component [Source:HGNC Symbol;Acc:HGNC:23197]	0.0525994	0.268243	0.196089	0.844541	0.91785	0.0428737	0.268928	0.159425	0.873334	0.92966
ENSG00000075856	1483.83	SART3	spliceosome associated factor 3, U4/U6 recycling protein [Source:HGNC Symbol;Acc:HGNC:16860]	0.177548	0.0373209	4.75733	1.96166e-06	2.52673e-05	0.459662	0.0365195	12.5867	2.49802e-36	9.15983e-35
ENSG00000075884	0	ARHGAP15	Rho GTPase activating protein 15 [Source:HGNC Symbol;Acc:HGNC:21030]	NA	NA	NA	NA	NA	NA	NA	NA	NA	NA
ENSG00000075886	57.1479	TUBA3D	tubulin alpha 3d [Source:HGNC Symbol;Acc:HGNC:24071]	0.046403	0.181355	0.255868	0.798053	0.891751	-0.0354582	0.182663	-0.194118	0.846083	0.911661
ENSG00000075891	2.26542	PAX2	paired box 2 [Source:HGNC Symbol;Acc:HGNC:8616]	0.318035	0.923325	0.344445	0.730511	NA	-1.76644	1.17631	-1.50168	0.133179	0.257754
ENSG00000075914	1003.84	EXOSC7	exosome component 7 [Source:HGNC Symbol;Acc:HGNC:28112]	-0.00159521	0.0448521	-0.035566	0.971628	0.985858	-0.0540101	0.0451349	-1.19664	0.231448	0.39023
ENSG00000075945	532.63	KIFAP3	kinesin associated protein 3 [Source:HGNC Symbol;Acc:HGNC:17060]	-0.0917621	0.0610013	-1.50426	0.132513	0.282266	-0.305733	0.0623803	-4.90112	9.52914e-07	5.26458e-06
ENSG00000075975	654.277	MKRN2	makorin ring finger protein 2 [Source:HGNC Symbol;Acc:HGNC:7113]	0.0761676	0.0523528	1.45489	0.1457	0.302141	0.0605403	0.0525293	1.1525	0.249114	0.410993
ENSG00000076003	2544.26	MCM6	minichromosome maintenance complex component 6 [Source:HGNC Symbol;Acc:HGNC:6949]	0.0659743	0.0403287	1.63592	0.101857	0.233246	0.124682	0.0402575	3.09712	0.00195412	0.00663554
ENSG00000076043	1397.48	REXO2	RNA exonuclease 2 [Source:HGNC Symbol;Acc:HGNC:17851]	-0.196741	0.0475779	-4.13513	3.54749e-05	0.000331047	-0.208899	0.0476776	-4.38149	1.17871e-05	5.67871e-05
ENSG00000076053	346.209	RBM7	RNA binding motif protein 7 [Source:HGNC Symbol;Acc:HGNC:9904]	0.0589241	0.0742366	0.793733	0.427351	0.619155	-0.0213677	0.0749613	-0.285049	0.775606	0.87031
ENSG00000076067	165.951	RBMS2	RNA binding motif single stranded interacting protein 2 [Source:HGNC Symbol;Acc:HGNC:9909]	-0.0520135	0.105582	-0.492634	0.622271	0.77491	0.113361	0.103964	1.09039	0.27554	0.44189
ENSG00000076108	1935.63	BAZ2A	bromodomain adjacent to zinc finger domain 2A [Source:HGNC Symbol;Acc:HGNC:962]	0.0253355	0.0355538	0.712594	0.476097	0.66393	0.17787	0.0351992	5.05325	4.34355e-07	2.50931e-06
ENSG00000076201	1255.63	PTPN23	protein tyrosine phosphatase non-receptor type 23 [Source:HGNC Symbol;Acc:HGNC:14406]	0.0451723	0.0438394	1.0304	0.30282	0.495758	0.12244	0.0436306	2.80629	0.00501154	0.0155981
ENSG00000076242	1981.49	MLH1	mutL homolog 1 [Source:HGNC Symbol;Acc:HGNC:7127]	-0.13615	0.0406873	-3.34625	0.000819128	0.00505769	0.246734	0.0398794	6.18699	6.1322e-10	4.71662e-09
ENSG00000076248	1283.55	UNG	uracil DNA glycosylase [Source:HGNC Symbol;Acc:HGNC:12572]	0.0471966	0.0421923	1.11861	0.263308	0.452032	-0.213271	0.0431078	-4.9474	7.52117e-07	4.21142e-06
ENSG00000076258	43.5213	FMO4	flavin containing dimethylaniline monoxygenase 4 [Source:HGNC Symbol;Acc:HGNC:3772]	-0.45863	0.215727	-2.12597	0.0335054	0.101371	-0.374525	0.214063	-1.7496	0.0801875	0.171856
ENSG00000076321	793.766	KLHL20	kelch like family member 20 [Source:HGNC Symbol;Acc:HGNC:25056]	0.171216	0.0489982	3.49434	0.000475244	0.00320991	0.252643	0.0487296	5.18458	2.16502e-07	1.29796e-06
ENSG00000076344	23.3942	RGS11	regulator of G protein signaling 11 [Source:HGNC Symbol;Acc:HGNC:9993]	-0.314812	0.274094	-1.14855	0.250741	NA	-1.02912	0.303893	-3.38647	0.000707991	0.0025997
ENSG00000076351	338.193	SLC46A1	solute carrier family 46 member 1 [Source:HGNC Symbol;Acc:HGNC:30521]	0.185755	0.0793502	2.34095	0.0192348	0.066354	-0.298024	0.0829249	-3.5939	0.000325768	0.00126574
ENSG00000076356	45.0746	PLXNA2	plexin A2 [Source:HGNC Symbol;Acc:HGNC:9100]	-0.0987376	0.221366	-0.446039	0.655569	0.79989	-0.67972	0.234065	-2.90398	0.0036845	0.0118178
ENSG00000076382	1708.15	SPAG5	sperm associated antigen 5 [Source:HGNC Symbol;Acc:HGNC:13452]	0.13276	0.0430146	3.08638	0.0020261	0.0107244	0.637715	0.0419731	15.1934	3.91071e-52	2.94993e-50
ENSG00000076513	1690.38	ANKRD13A	ankyrin repeat domain 13A [Source:HGNC Symbol;Acc:HGNC:21268]	-0.0174717	0.0401359	-0.435314	0.663335	0.805662	-0.16096	0.0406644	-3.95826	7.54974e-05	0.000324431
ENSG00000076554	4240.63	TPD52	tumor protein D52 [Source:HGNC Symbol;Acc:HGNC:12005]	-0.0153589	0.0381418	-0.402678	0.687185	0.820509	0.296025	0.037852	7.8206	5.25739e-15	6.16554e-14
ENSG00000076555	188.508	ACACB	acetyl-CoA carboxylase beta [Source:HGNC Symbol;Acc:HGNC:85]	-0.109735	0.116607	-0.941065	0.346671	0.541736	0.142495	0.114635	1.24303	0.213855	0.368752
ENSG00000076604	2929.22	TRAF4	TNF receptor associated factor 4 [Source:HGNC Symbol;Acc:HGNC:12034]	-0.0896877	0.0338346	-2.65077	0.00803088	0.0331406	0.0852644	0.0335198	2.54371	0.0109684	0.0312845
ENSG00000076641	433.103	PAG1	phosphoprotein membrane anchor with glycosphingolipid microdomains 1 [Source:HGNC Symbol;Acc:HGNC:30043]	0.18355	0.0753954	2.4345	0.0149125	0.0544242	0.700647	0.073233	9.56736	1.09672e-21	1.9883e-20
ENSG00000076650	311.727	GPATCH1	G-patch domain containing 1 [Source:HGNC Symbol;Acc:HGNC:24658]	0.33236	0.0770918	4.31122	1.62355e-05	0.000165806	0.410602	0.0766573	5.35634	8.49266e-08	5.34486e-07
ENSG00000076662	0.171739	ICAM3	intercellular adhesion molecule 3 [Source:HGNC Symbol;Acc:HGNC:5346]	-0.482969	3.94507	-0.122423	0.902564	NA	-1.18791	3.94507	-0.301112	0.763329	NA
ENSG00000076685	1162.69	NT5C2	5'-nucleotidase, cytosolic II [Source:HGNC Symbol;Acc:HGNC:8022]	-0.224299	0.0446738	-5.02082	5.14513e-07	7.42659e-06	-0.453722	0.0456589	-9.93721	2.86741e-23	5.60765e-22
ENSG00000076706	3.02836	MCAM	melanoma cell adhesion molecule [Source:HGNC Symbol;Acc:HGNC:6934]	-0.542437	0.823114	-0.659007	0.509891	NA	-1.51333	0.921621	-1.64204	0.100583	0.205793
ENSG00000076716	150.573	GPC4	glypican 4 [Source:HGNC Symbol;Acc:HGNC:4452]	0.299557	0.106568	2.81094	0.00493975	0.0223564	-0.0416878	0.110802	-0.376235	0.706742	0.821479
ENSG00000076770	446.231	MBNL3	muscleblind like splicing regulator 3 [Source:HGNC Symbol;Acc:HGNC:20564]	0.217672	0.0740194	2.94074	0.00327425	0.0159225	0.188077	0.0742519	2.53296	0.0113105	0.0321549
ENSG00000076826	941.146	CAMSAP3	calmodulin regulated spectrin associated protein family member 3 [Source:HGNC Symbol;Acc:HGNC:29307]	0.203895	0.0563405	3.61898	0.000295767	0.00212618	0.187036	0.0564507	3.31326	0.000922153	0.00332198
ENSG00000076864	377.857	RAP1GAP	RAP1 GTPase activating protein [Source:HGNC Symbol;Acc:HGNC:9858]	0.0389901	0.085975	0.453504	0.650186	0.795746	-0.458281	0.0892683	-5.13375	2.84029e-07	1.6771e-06
ENSG00000076924	1614.9	XAB2	XPA binding protein 2 [Source:HGNC Symbol;Acc:HGNC:14089]	0.0787936	0.0450147	1.7504	0.0800498	0.196088	0.229908	0.0446785	5.14582	2.6635e-07	1.578e-06
ENSG00000076928	537.03	ARHGEF1	Rho guanine nucleotide exchange factor 1 [Source:HGNC Symbol;Acc:HGNC:681]	0.0525083	0.0639517	0.821061	0.411612	0.604806	-0.152657	0.06524	-2.33994	0.0192871	0.0511761
ENSG00000076944	539.457	STXBP2	syntaxin binding protein 2 [Source:HGNC Symbol;Acc:HGNC:11445]	-0.084184	0.0785401	-1.07186	0.283783	0.473836	-0.285398	0.079614	-3.58477	0.00033738	0.00130701
ENSG00000076984	1257.87	MAP2K7	mitogen-activated protein kinase kinase 7 [Source:HGNC Symbol;Acc:HGNC:6847]	0.322442	0.0509722	6.32584	2.51853e-10	7.18603e-09	0.495945	0.0505692	9.80726	1.04779e-22	1.98835e-21
ENSG00000077009	0.0856698	NMRK2	nicotinamide riboside kinase 2 [Source:HGNC Symbol;Acc:HGNC:17871]	-1.258	5.94529	-0.211597	0.832422	NA	-1.2416	5.94529	-0.208837	0.834575	NA
ENSG00000077044	864.759	DGKD	diacylglycerol kinase delta [Source:HGNC Symbol;Acc:HGNC:2851]	-0.14043	0.0534911	-2.62531	0.00865713	0.0351851	0.0628083	0.0526899	1.19204	0.233247	0.392417
ENSG00000077063	9.43211	CTTNBP2	cortactin binding protein 2 [Source:HGNC Symbol;Acc:HGNC:15679]	-0.190829	0.424022	-0.450045	0.652678	NA	-0.760208	0.459781	-1.65341	0.0982466	0.202133
ENSG00000077080	0.464649	ACTL6B	actin like 6B [Source:HGNC Symbol;Acc:HGNC:160]	1.20897	1.99782	0.605145	0.545082	NA	0.80365	2.04147	0.393662	0.69383	NA
ENSG00000077092	58.518	RARB	retinoic acid receptor beta [Source:HGNC Symbol;Acc:HGNC:9865]	0.141583	0.168325	0.841124	0.400279	0.595196	0.303289	0.166391	1.82274	0.0683423	0.150564
ENSG00000077097	4288.06	TOP2B	DNA topoisomerase II beta [Source:HGNC Symbol;Acc:HGNC:11990]	-0.0206463	0.0334433	-0.617353	0.537002	0.712413	0.0853957	0.0333297	2.56215	0.0104026	0.0298268
ENSG00000077147	6346.22	TM9SF3	transmembrane 9 superfamily member 3 [Source:HGNC Symbol;Acc:HGNC:21529]	-0.0464594	0.0342354	-1.35706	0.174763	0.34189	0.157203	0.0340682	4.61435	3.94324e-06	2.02296e-05
ENSG00000077150	1064.99	NFKB2	nuclear factor kappa B subunit 2 [Source:HGNC Symbol;Acc:HGNC:7795]	0.206774	0.0438675	4.7136	2.43375e-06	3.05705e-05	-0.280438	0.0459307	-6.10567	1.02373e-09	7.73048e-09
ENSG00000077152	1244.51	UBE2T	ubiquitin conjugating enzyme E2 T [Source:HGNC Symbol;Acc:HGNC:25009]	0.0935383	0.0546844	1.71051	0.0871712	0.208224	0.794492	0.0531296	14.9538	1.47039e-50	1.04215e-48
ENSG00000077157	504.9	PPP1R12B	protein phosphatase 1 regulatory subunit 12B [Source:HGNC Symbol;Acc:HGNC:7619]	-0.0162504	0.0606405	-0.267979	0.788715	0.88627	-0.0671565	0.0610467	-1.10008	0.271296	0.437008
ENSG00000077232	2495.88	DNAJC10	DnaJ heat shock protein family (Hsp40) member C10 [Source:HGNC Symbol;Acc:HGNC:24637]	-0.302194	0.0381222	-7.92698	2.24542e-15	1.26862e-13	-0.498924	0.0385754	-12.9338	2.90282e-38	1.16782e-36
ENSG00000077235	4430.79	GTF3C1	general transcription factor IIIC subunit 1 [Source:HGNC Symbol;Acc:HGNC:4664]	0.154882	0.0322875	4.79697	1.61085e-06	2.10369e-05	0.515249	0.0318841	16.1601	9.64637e-59	8.97537e-57
ENSG00000077238	139.803	IL4R	interleukin 4 receptor [Source:HGNC Symbol;Acc:HGNC:6015]	-0.098707	0.119025	-0.829294	0.406938	0.600696	-0.455557	0.124397	-3.66212	0.000250138	0.000988431
ENSG00000077254	1605.55	USP33	ubiquitin specific peptidase 33 [Source:HGNC Symbol;Acc:HGNC:20059]	0.129482	0.0449174	2.88267	0.00394318	0.0185577	0.417886	0.044276	9.4382	3.79252e-21	6.63095e-20
ENSG00000077264	21.4384	PAK3	p21 (RAC1) activated kinase 3 [Source:HGNC Symbol;Acc:HGNC:8592]	0.141578	0.354059	0.399871	0.689252	NA	-0.105244	0.361749	-0.290931	0.771104	0.867225
ENSG00000077274	1.26377	CAPN6	calpain 6 [Source:HGNC Symbol;Acc:HGNC:1483]	-0.44533	1.13209	-0.393371	0.694045	NA	-3.20177	1.38147	-2.31765	0.0204685	NA
ENSG00000077279	1.88161	DCX	doublecortin [Source:HGNC Symbol;Acc:HGNC:2714]	-0.551696	1.10864	-0.497634	0.618742	NA	-0.287548	1.08329	-0.265439	0.790672	0.879352
ENSG00000077312	848.081	SNRPA	small nuclear ribonucleoprotein polypeptide A [Source:HGNC Symbol;Acc:HGNC:11151]	-0.0878598	0.050854	-1.72769	0.0840443	0.203263	0.0470067	0.0503456	0.933681	0.350468	0.523284
ENSG00000077327	4.48882	SPAG6	sperm associated antigen 6 [Source:HGNC Symbol;Acc:HGNC:11215]	0.722134	0.865506	0.834348	0.404085	NA	0.600181	0.877683	0.683824	0.494086	0.65794
ENSG00000077348	263.41	EXOSC5	exosome component 5 [Source:HGNC Symbol;Acc:HGNC:24662]	-0.0409139	0.102919	-0.397536	0.690972	0.822716	-0.175996	0.104005	-1.69218	0.0906123	0.189461
ENSG00000077380	1183.08	DYNC1I2	dynein cytoplasmic 1 intermediate chain 2 [Source:HGNC Symbol;Acc:HGNC:2964]	-0.120557	0.0486848	-2.47627	0.0132764	0.0495944	-0.00529852	0.0483507	-0.109585	0.912738	0.952656
ENSG00000077420	0	APBB1IP	amyloid beta precursor protein binding family B member 1 interacting protein [Source:HGNC Symbol;Acc:HGNC:17379]	NA	NA	NA	NA	NA	NA	NA	NA	NA	NA
ENSG00000077454	289.31	LRCH4	leucine rich repeats and calponin homology domain containing 4 [Source:HGNC Symbol;Acc:HGNC:6691]	0.0845341	0.0925493	0.913395	0.361035	0.556453	0.0794089	0.0927113	0.856518	0.391711	0.564134
ENSG00000077458	437.105	FAM76B	family with sequence similarity 76 member B [Source:HGNC Symbol;Acc:HGNC:28492]	0.20173	0.0649395	3.10643	0.0018936	0.0101331	0.351053	0.0642032	5.46785	4.5554e-08	2.94504e-07
ENSG00000077463	611.717	SIRT6	sirtuin 6 [Source:HGNC Symbol;Acc:HGNC:14934]	0.224309	0.0667077	3.36257	0.000772209	0.00482457	0.387193	0.0660965	5.85798	4.68518e-09	3.33184e-08
ENSG00000077498	0	TYR	tyrosinase [Source:HGNC Symbol;Acc:HGNC:12442]	NA	NA	NA	NA	NA	NA	NA	NA	NA	NA
ENSG00000077514	580.477	POLD3	DNA polymerase delta 3, accessory subunit [Source:HGNC Symbol;Acc:HGNC:20932]	0.349049	0.0654138	5.33602	9.50112e-08	1.59328e-06	0.7005	0.0641068	10.9271	8.55591e-28	2.08913e-26
ENSG00000077522	0.219239	ACTN2	actinin alpha 2 [Source:HGNC Symbol;Acc:HGNC:164]	0	5.94781	0	1	NA	1.67424	5.9476	0.281498	0.778328	NA
ENSG00000077549	3267.56	CAPZB	capping actin protein of muscle Z-line subunit beta [Source:HGNC Symbol;Acc:HGNC:1491]	-0.0926142	0.0315306	-2.93727	0.00331111	0.0160694	0.203291	0.0310402	6.54928	5.78169e-11	4.85354e-10
ENSG00000077585	220.216	GPR137B	G protein-coupled receptor 137B [Source:HGNC Symbol;Acc:HGNC:11862]	-0.166581	0.0950221	-1.75308	0.0795887	0.195212	-0.152654	0.0950521	-1.606	0.108273	0.218983
ENSG00000077616	46.4531	NAALAD2	N-acetylated alpha-linked acidic dipeptidase 2 [Source:HGNC Symbol;Acc:HGNC:14526]	-0.0730251	0.210606	-0.346738	0.728788	0.849195	0.404356	0.200999	2.01173	0.0442481	0.104713
ENSG00000077684	464.305	JADE1	jade family PHD finger 1 [Source:HGNC Symbol;Acc:HGNC:30027]	0.0613	0.0640202	0.95751	0.33831	0.53361	0.425966	0.0619136	6.88001	5.98471e-12	5.50536e-11
ENSG00000077713	0.732124	SLC25A43	solute carrier family 25 member 43 [Source:HGNC Symbol;Acc:HGNC:30557]	0.811301	1.87788	0.43203	0.66572	NA	0.847913	1.87525	0.45216	0.651154	NA
ENSG00000077721	1750.67	UBE2A	ubiquitin conjugating enzyme E2 A [Source:HGNC Symbol;Acc:HGNC:12472]	-0.0541104	0.04274	-1.26604	0.205501	0.382612	0.208451	0.0421251	4.94837	7.4839e-07	4.19277e-06
ENSG00000077782	109.808	FGFR1	fibroblast growth factor receptor 1 [Source:HGNC Symbol;Acc:HGNC:3688]	-0.0721274	0.121693	-0.5927	0.553382	0.726299	-0.584418	0.12914	-4.52545	6.02667e-06	3.01205e-05
ENSG00000077800	0.662281	FKBP6	FKBP prolyl isomerase 6 [Source:HGNC Symbol;Acc:HGNC:3722]	-1.81524	1.84625	-0.983201	0.325509	NA	-0.487661	1.74912	-0.278803	0.780396	NA
ENSG00000077935	2.34979	SMC1B	structural maintenance of chromosomes 1B [Source:HGNC Symbol;Acc:HGNC:11112]	1.00112	0.891986	1.12235	0.261715	NA	1.01767	0.89198	1.14091	0.253907	0.416591
ENSG00000077942	4.39195	FBLN1	fibulin 1 [Source:HGNC Symbol;Acc:HGNC:3600]	0.450838	0.593757	0.759296	0.447675	NA	0.248622	0.60659	0.409868	0.681903	0.804967
ENSG00000077943	1.443	ITGA8	integrin subunit alpha 8 [Source:HGNC Symbol;Acc:HGNC:6144]	-1.70354	1.17963	-1.44413	0.148703	NA	-0.88486	1.08173	-0.818004	0.413355	0.584603
ENSG00000077984	1.44888	CST7	cystatin F [Source:HGNC Symbol;Acc:HGNC:2479]	0.098116	1.11652	0.0878765	0.929975	NA	-0.761431	1.1854	-0.642339	0.520653	0.680111
ENSG00000078018	329.539	MAP2	microtubule associated protein 2 [Source:HGNC Symbol;Acc:HGNC:6839]	-0.0865875	0.0917589	-0.943642	0.345353	0.540445	0.570372	0.0887722	6.42512	1.31762e-10	1.07119e-09
ENSG00000078043	1015.26	PIAS2	protein inhibitor of activated STAT 2 [Source:HGNC Symbol;Acc:HGNC:17311]	-0.0385914	0.0478657	-0.806244	0.420102	0.613311	0.129693	0.0472968	2.74212	0.00610448	0.0186342
ENSG00000078053	0.47917	AMPH	amphiphysin [Source:HGNC Symbol;Acc:HGNC:471]	0.195378	2.3008	0.0849173	0.932327	NA	-1.51666	2.41168	-0.628883	0.529426	NA
ENSG00000078061	1064.6	ARAF	A-Raf proto-oncogene, serine/threonine kinase [Source:HGNC Symbol;Acc:HGNC:646]	0.101829	0.0445002	2.28829	0.0221206	0.0742466	0.12277	0.0444827	2.75994	0.00578119	0.01774
ENSG00000078070	2292.44	MCCC1	methylcrotonoyl-CoA carboxylase 1 [Source:HGNC Symbol;Acc:HGNC:6936]	-0.119069	0.032336	-3.68224	0.000231193	0.00170883	0.0201385	0.0320052	0.629225	0.529202	0.687407
ENSG00000078081	0.93399	LAMP3	lysosomal associated membrane protein 3 [Source:HGNC Symbol;Acc:HGNC:14582]	0.871986	1.30542	0.667971	0.504152	NA	-1.08408	1.57306	-0.689149	0.490729	NA
ENSG00000078098	0.382237	FAP	fibroblast activation protein alpha [Source:HGNC Symbol;Acc:HGNC:3590]	-0.496414	2.39243	-0.207494	0.835624	NA	0.95949	2.39167	0.40118	0.688287	NA
ENSG00000078114	724.009	NEBL	nebulette [Source:HGNC Symbol;Acc:HGNC:16932]	-0.0450688	0.0561402	-0.80279	0.422096	0.614994	-0.147936	0.0567557	-2.60654	0.00914628	0.0266637
ENSG00000078124	1052.39	ACER3	alkaline ceramidase 3 [Source:HGNC Symbol;Acc:HGNC:16066]	-0.056788	0.0524767	-1.08216	0.279183	0.468772	0.0225058	0.0522385	0.430828	0.666593	0.79443
ENSG00000078140	4860.06	UBE2K	ubiquitin conjugating enzyme E2 K [Source:HGNC Symbol;Acc:HGNC:4914]	0.0115967	0.0329851	0.351575	0.725157	0.847025	-0.00738691	0.0330246	-0.223679	0.823007	0.89834
ENSG00000078142	760.706	PIK3C3	phosphatidylinositol 3-kinase catalytic subunit type 3 [Source:HGNC Symbol;Acc:HGNC:8974]	-0.023859	0.0536128	-0.445024	0.656303	0.800405	-0.164272	0.0543535	-3.0223	0.00250862	0.0083493
ENSG00000078177	572.083	N4BP2	NEDD4 binding protein 2 [Source:HGNC Symbol;Acc:HGNC:29851]	0.25177	0.0669585	3.7601	0.000169848	0.00130753	0.0971064	0.0677107	1.43414	0.151533	0.284922
ENSG00000078237	100.177	TIGAR	TP53 induced glycolysis regulatory phosphatase [Source:HGNC Symbol;Acc:HGNC:1185]	0.236068	0.14994	1.57441	0.115392	0.254869	1.04781	0.141773	7.39071	1.46047e-13	1.53542e-12
ENSG00000078246	570.361	TULP3	TUB like protein 3 [Source:HGNC Symbol;Acc:HGNC:12425]	0.382888	0.0571547	6.69915	2.09635e-11	7.01536e-10	0.822105	0.0551693	14.9015	3.22299e-50	2.26156e-48
ENSG00000078269	140.761	SYNJ2	synaptojanin 2 [Source:HGNC Symbol;Acc:HGNC:11504]	0.00444469	0.124949	0.0355722	0.971624	0.985858	-0.00882004	0.125267	-0.0704098	0.943867	0.969716
ENSG00000078295	0.278022	ADCY2	adenylate cyclase 2 [Source:HGNC Symbol;Acc:HGNC:233]	0.941409	2.6879	0.350239	0.726159	NA	-0.480007	2.6922	-0.178296	0.858491	NA
ENSG00000078304	2734.6	PPP2R5C	protein phosphatase 2 regulatory subunit B'gamma [Source:HGNC Symbol;Acc:HGNC:9311]	-0.0100648	0.03363	-0.299281	0.764725	0.871435	0.20455	0.0332379	6.15412	7.54956e-10	5.76063e-09
ENSG00000078319	218.668	PMS2P1	PMS1 homolog 2, mismatch repair system component pseudogene 1 [Source:HGNC Symbol;Acc:HGNC:9123]	-0.103553	0.0945084	-1.0957	0.273211	0.462876	-0.250131	0.096032	-2.60466	0.00919653	0.026788
ENSG00000078328	0.06007	RBFOX1	RNA binding fox-1 homolog 1 [Source:HGNC Symbol;Acc:HGNC:18222]	0	5.94781	0	1	NA	0	5.94781	0	1	NA
ENSG00000078369	14471.5	GNB1	G protein subunit beta 1 [Source:HGNC Symbol;Acc:HGNC:4396]	-0.0131682	0.0252741	-0.521015	0.602356	0.76147	0.299095	0.0251184	11.9074	1.08305e-32	3.4193e-31
ENSG00000078399	5.56255	HOXA9	homeobox A9 [Source:HGNC Symbol;Acc:HGNC:5109]	0.482302	0.650167	0.741813	0.4582	NA	0.0905523	0.670578	0.135036	0.892583	0.941695
ENSG00000078401	10.8813	EDN1	endothelin 1 [Source:HGNC Symbol;Acc:HGNC:3176]	0.817032	0.428346	1.90741	0.0564675	NA	1.26578	0.416546	3.03876	0.00237555	0.00794143
ENSG00000078403	404.989	MLLT10	MLLT10 histone lysine methyltransferase DOT1L cofactor [Source:HGNC Symbol;Acc:HGNC:16063]	-0.148683	0.0738851	-2.01235	0.0441828	0.125647	-0.00323527	0.0730687	-0.0442772	0.964683	0.980331
ENSG00000078487	56.2301	ZCWPW1	zinc finger CW-type and PWWP domain containing 1 [Source:HGNC Symbol;Acc:HGNC:23486]	-0.416859	0.221515	-1.88185	0.0598559	0.157117	1.21343	0.193676	6.26524	3.72245e-10	2.91733e-09
ENSG00000078549	0.0272666	ADCYAP1R1	ADCYAP receptor type I [Source:HGNC Symbol;Acc:HGNC:242]	-0.496359	5.94781	-0.0834525	0.933492	NA	-0.479955	5.94781	-0.0806945	0.935685	NA
ENSG00000078579	0	FGF20	fibroblast growth factor 20 [Source:HGNC Symbol;Acc:HGNC:3677]	NA	NA	NA	NA	NA	NA	NA	NA	NA	NA
ENSG00000078589	0.0313801	P2RY10	P2Y receptor family member 10 [Source:HGNC Symbol;Acc:HGNC:19906]	0	5.94781	0	1	NA	0	5.94781	0	1	NA
ENSG00000078596	0.670667	ITM2A	integral membrane protein 2A [Source:HGNC Symbol;Acc:HGNC:6173]	-0.496413	1.95114	-0.254422	0.79917	NA	0.241338	1.95114	0.12369	0.90156	NA
ENSG00000078618	2454.24	NRDC	nardilysin convertase [Source:HGNC Symbol;Acc:HGNC:7995]	-0.0821599	0.035502	-2.31423	0.0206549	0.0702224	-0.144421	0.0356759	-4.04815	5.1624e-05	0.000227726
ENSG00000078668	2753.19	VDAC3	voltage dependent anion channel 3 [Source:HGNC Symbol;Acc:HGNC:12674]	0.0526885	0.0346102	1.52234	0.127924	0.275299	0.440389	0.0339487	12.9722	1.75949e-38	7.14656e-37
ENSG00000078674	2838.59	PCM1	pericentriolar material 1 [Source:HGNC Symbol;Acc:HGNC:8727]	0.199939	0.0356555	5.60753	2.05232e-08	3.89852e-07	0.506039	0.0351802	14.3842	6.50307e-47	3.91315e-45
ENSG00000078687	616.555	TNRC6C	trinucleotide repeat containing adaptor 6C [Source:HGNC Symbol;Acc:HGNC:29318]	0.3465	0.064509	5.37135	7.81486e-08	1.33258e-06	0.657253	0.0633147	10.3807	3.03441e-25	6.49997e-24
ENSG00000078699	1555.89	CBFA2T2	CBFA2/RUNX1 partner transcriptional co-repressor 2 [Source:HGNC Symbol;Acc:HGNC:1536]	0.114712	0.0472436	2.42811	0.0151779	0.0551331	0.367108	0.0466421	7.87073	3.52573e-15	4.18589e-14
ENSG00000078725	18.4976	BRINP1	BMP/retinoic acid inducible neural specific 1 [Source:HGNC Symbol;Acc:HGNC:2687]	0.111014	0.295673	0.37546	0.707318	NA	-0.0822013	0.302305	-0.271915	0.785688	0.876116
ENSG00000078747	1596.97	ITCH	itchy E3 ubiquitin protein ligase [Source:HGNC Symbol;Acc:HGNC:13890]	0.0198822	0.0373964	0.53166	0.594962	0.755992	0.182247	0.0369507	4.93216	8.13271e-07	4.53461e-06
ENSG00000078795	8.91112	PKD2L2	polycystin 2 like 2, transient receptor potential cation channel [Source:HGNC Symbol;Acc:HGNC:9012]	-0.595362	0.463347	-1.28492	0.198822	NA	-0.365391	0.450861	-0.810429	0.417694	0.589498
ENSG00000078804	1464.27	TP53INP2	tumor protein p53 inducible nuclear protein 2 [Source:HGNC Symbol;Acc:HGNC:16104]	0.20169	0.0425419	4.74097	2.12692e-06	2.71306e-05	-0.0186226	0.0431957	-0.431121	0.66638	0.794279
ENSG00000078808	5381.88	SDF4	stromal cell derived factor 4 [Source:HGNC Symbol;Acc:HGNC:24188]	-0.033543	0.0421939	-0.794974	0.426629	0.618557	0.00678933	0.0421727	0.160989	0.872102	0.928785
ENSG00000078814	16.9885	MYH7B	myosin heavy chain 7B [Source:HGNC Symbol;Acc:HGNC:15906]	-0.454707	0.404657	-1.12368	0.261147	NA	-0.165682	0.395307	-0.419124	0.675126	0.799962
ENSG00000078898	0	BPIFB2	BPI fold containing family B member 2 [Source:HGNC Symbol;Acc:HGNC:16177]	NA	NA	NA	NA	NA	NA	NA	NA	NA	NA
ENSG00000078900	87.3632	TP73	tumor protein p73 [Source:HGNC Symbol;Acc:HGNC:12003]	0.161662	0.146314	1.1049	0.269203	0.458565	-0.164037	0.151319	-1.08405	0.278343	0.445302
ENSG00000078902	2695.45	TOLLIP	toll interacting protein [Source:HGNC Symbol;Acc:HGNC:16476]	0.0190411	0.0422908	0.450242	0.652536	0.797881	0.114773	0.0421555	2.72261	0.00647691	0.0196296
ENSG00000078967	240.922	UBE2D4	ubiquitin conjugating enzyme E2 D4 (putative) [Source:HGNC Symbol;Acc:HGNC:21647]	0.00688408	0.0894486	0.0769613	0.938654	0.970503	-0.0190743	0.0898074	-0.212391	0.831802	0.902797
ENSG00000079101	33.6778	CLUL1	clusterin like 1 [Source:HGNC Symbol;Acc:HGNC:2096]	-0.568205	0.236544	-2.4021	0.016301	0.0583751	-0.162449	0.224407	-0.723903	0.469126	0.636091
ENSG00000079102	0.036491	RUNX1T1	RUNX1 partner transcriptional co-repressor 1 [Source:HGNC Symbol;Acc:HGNC:1535]	0	5.94781	0	1	NA	0	5.94781	0	1	NA
ENSG00000079112	0.149722	CDH17	cadherin 17 [Source:HGNC Symbol;Acc:HGNC:1756]	-0.496408	5.85455	-0.0847902	0.932428	NA	-0.480004	5.85455	-0.0819881	0.934656	NA
ENSG00000079134	716.506	THOC1	THO complex 1 [Source:HGNC Symbol;Acc:HGNC:19070]	0.118961	0.0572086	2.07943	0.0375781	0.110543	0.586744	0.0554172	10.5878	3.39606e-26	7.62255e-25
ENSG00000079150	53.4322	FKBP7	FKBP prolyl isomerase 7 [Source:HGNC Symbol;Acc:HGNC:3723]	-0.139749	0.184193	-0.758707	0.448028	0.638087	0.254885	0.176851	1.44124	0.149516	0.282211
ENSG00000079156	79.5926	OSBPL6	oxysterol binding protein like 6 [Source:HGNC Symbol;Acc:HGNC:16388]	-0.287863	0.159758	-1.80186	0.0715667	0.180135	-1.04007	0.171759	-6.05541	1.40059e-09	1.04272e-08
ENSG00000079215	32.5782	SLC1A3	solute carrier family 1 member 3 [Source:HGNC Symbol;Acc:HGNC:10941]	0.18984	0.262507	0.72318	0.469569	0.658463	-0.406382	0.276001	-1.47239	0.140915	0.269491
ENSG00000079246	9438.02	XRCC5	X-ray repair cross complementing 5 [Source:HGNC Symbol;Acc:HGNC:12833]	0.0363168	0.0320417	1.13342	0.257037	0.444748	0.368958	0.0318653	11.5787	5.28445e-31	1.52061e-29
ENSG00000079257	35.3977	LXN	latexin [Source:HGNC Symbol;Acc:HGNC:13347]	-0.154742	0.212066	-0.729689	0.46558	0.654937	-0.435075	0.218774	-1.98869	0.0467353	0.109568
ENSG00000079263	0.934702	SP140	SP140 nuclear body protein [Source:HGNC Symbol;Acc:HGNC:17133]	-2.50093	1.61859	-1.54513	0.122315	NA	-2.48452	1.61859	-1.53499	0.124785	NA
ENSG00000079277	441.195	MKNK1	MAPK interacting serine/threonine kinase 1 [Source:HGNC Symbol;Acc:HGNC:7110]	0.0487186	0.0649623	0.749953	0.453283	0.643067	0.119286	0.0646188	1.846	0.0648921	0.144242
ENSG00000079308	10.3903	TNS1	tensin 1 [Source:HGNC Symbol;Acc:HGNC:11973]	-0.761883	0.460002	-1.65626	0.0976688	NA	-0.671241	0.456377	-1.4708	0.141344	0.27019
ENSG00000079313	534.47	REXO1	RNA exonuclease 1 homolog [Source:HGNC Symbol;Acc:HGNC:24616]	0.191809	0.0744591	2.57603	0.00999413	0.0392959	0.207619	0.0744591	2.78837	0.00529743	0.0163907
ENSG00000079332	2665.43	SAR1A	secretion associated Ras related GTPase 1A [Source:HGNC Symbol;Acc:HGNC:10534]	0.0758756	0.0290185	2.61473	0.00892973	0.0360475	0.153656	0.0288808	5.32035	1.03567e-07	6.4242e-07
ENSG00000079335	137.729	CDC14A	cell division cycle 14A [Source:HGNC Symbol;Acc:HGNC:1718]	-0.224117	0.121421	-1.84579	0.0649232	0.167447	0.19395	0.11746	1.65119	0.0986988	0.202843
ENSG00000079337	68.8204	RAPGEF3	Rap guanine nucleotide exchange factor 3 [Source:HGNC Symbol;Acc:HGNC:16629]	-0.249387	0.181812	-1.37167	0.170165	0.335941	-0.909658	0.195845	-4.64478	3.4044e-06	1.76021e-05
ENSG00000079385	9.46217	CEACAM1	CEA cell adhesion molecule 1 [Source:HGNC Symbol;Acc:HGNC:1814]	0.325963	0.457513	0.712469	0.476174	NA	-0.292321	0.492938	-0.593019	0.553169	0.70824
ENSG00000079387	717.59	SENP1	SUMO specific peptidase 1 [Source:HGNC Symbol;Acc:HGNC:17927]	0.214347	0.0687776	3.11652	0.00182998	0.00984865	0.718294	0.0672206	10.6856	1.1885e-26	2.73148e-25
ENSG00000079393	0.819763	DUSP13	dual specificity phosphatase 13 [Source:HGNC Symbol;Acc:HGNC:19681]	-1.07877	1.73602	-0.621403	0.534334	NA	-1.05743	1.74138	-0.607237	0.543694	NA
ENSG00000079432	1048.39	CIC	capicua transcriptional repressor [Source:HGNC Symbol;Acc:HGNC:14214]	0.151783	0.0597885	2.53866	0.0111277	0.0430206	0.233542	0.0595921	3.919	8.89163e-05	0.000378248
ENSG00000079435	5.2141	LIPE	lipase E, hormone sensitive type [Source:HGNC Symbol;Acc:HGNC:6621]	-0.183664	0.637504	-0.288098	0.773272	NA	-0.825648	0.685585	-1.2043	0.228475	0.386699
ENSG00000079459	4984.27	FDFT1	farnesyl-diphosphate farnesyltransferase 1 [Source:HGNC Symbol;Acc:HGNC:3629]	0.000649524	0.0354717	0.0183111	0.985391	0.992706	-0.0880518	0.0355801	-2.47475	0.013333	0.0370438
ENSG00000079462	361.022	PAFAH1B3	platelet activating factor acetylhydrolase 1b catalytic subunit 3 [Source:HGNC Symbol;Acc:HGNC:8576]	0.0233534	0.0806774	0.289466	0.772225	0.87604	0.192448	0.0797227	2.41397	0.0157797	0.0429628
ENSG00000079482	363.329	OPHN1	oligophrenin 1 [Source:HGNC Symbol;Acc:HGNC:8148]	-0.0348688	0.0778701	-0.447781	0.654311	0.799362	-0.0481977	0.078054	-0.617491	0.536911	0.693949
ENSG00000079557	0.153967	AFM	afamin [Source:HGNC Symbol;Acc:HGNC:316]	-0.482808	4.53061	-0.106566	0.915133	NA	-0.466403	4.53061	-0.102945	0.918007	NA
ENSG00000079616	1910.98	KIF22	kinesin family member 22 [Source:HGNC Symbol;Acc:HGNC:6391]	0.132371	0.0369729	3.58023	0.000343291	0.0024257	0.305066	0.0366514	8.32343	8.54512e-17	1.13725e-15
ENSG00000079689	1.44065	SCGN	secretagogin, EF-hand calcium binding protein [Source:HGNC Symbol;Acc:HGNC:16941]	-2.1992	1.50667	-1.45964	0.144388	NA	1.42346	1.20899	1.17739	0.239039	0.398858
ENSG00000079691	605.666	CARMIL1	capping protein regulator and myosin 1 linker 1 [Source:HGNC Symbol;Acc:HGNC:21581]	-0.0717188	0.0594753	-1.20586	0.227871	0.411256	0.0690032	0.0588907	1.17171	0.241312	0.401666
ENSG00000079739	398.152	PGM1	phosphoglucomutase 1 [Source:HGNC Symbol;Acc:HGNC:8905]	-0.0194724	0.071259	-0.273262	0.784652	0.884194	0.0975677	0.0705835	1.3823	0.166879	0.307106
ENSG00000079785	2969.17	DDX1	DEAD-box helicase 1 [Source:HGNC Symbol;Acc:HGNC:2734]	-0.00279495	0.032017	-0.0872958	0.930436	0.967108	0.199001	0.0316619	6.2852	3.27431e-10	2.58336e-09
ENSG00000079805	4186.81	DNM2	dynamin 2 [Source:HGNC Symbol;Acc:HGNC:2974]	0.00704373	0.0326181	0.215946	0.82903	0.909903	0.167065	0.0324263	5.15213	2.57542e-07	1.52753e-06
ENSG00000079819	251.37	EPB41L2	erythrocyte membrane protein band 4.1 like 2 [Source:HGNC Symbol;Acc:HGNC:3379]	0.120711	0.0980964	1.23053	0.218499	0.399156	0.398786	0.0962332	4.14395	3.41371e-05	0.000154425
ENSG00000079841	1072.37	RIMS1	regulating synaptic membrane exocytosis 1 [Source:HGNC Symbol;Acc:HGNC:17282]	-0.229132	0.0516217	-4.43868	9.05131e-06	9.86353e-05	-0.0293866	0.0508881	-0.577474	0.563619	0.716948
ENSG00000079931	0.764246	MOXD1	monooxygenase DBH like 1 [Source:HGNC Symbol;Acc:HGNC:21063]	0.946267	1.74711	0.54162	0.58808	NA	2.67958	1.59174	1.68342	0.0922931	NA
ENSG00000079950	683.293	STX7	syntaxin 7 [Source:HGNC Symbol;Acc:HGNC:11442]	-0.0593842	0.0600898	-0.988258	0.323026	0.517566	0.0443588	0.0596745	0.743346	0.457272	0.624752
ENSG00000079974	219.039	RABL2B	RAB, member of RAS oncogene family like 2B [Source:HGNC Symbol;Acc:HGNC:9800]	-0.177928	0.102094	-1.74279	0.0813704	0.198657	-0.243856	0.102778	-2.37265	0.0176609	0.047361
ENSG00000079999	3080.1	KEAP1	kelch like ECH associated protein 1 [Source:HGNC Symbol;Acc:HGNC:23177]	0.056746	0.0366703	1.54747	0.121751	0.265367	0.0318035	0.0367358	0.865735	0.386635	0.559198
ENSG00000080007	105.848	DDX43	DEAD-box helicase 43 [Source:HGNC Symbol;Acc:HGNC:18677]	0.329201	0.131695	2.49973	0.012429	0.0470616	0.52754	0.129512	4.07328	4.63562e-05	0.000205605
ENSG00000080031	5.39374	PTPRH	protein tyrosine phosphatase receptor type H [Source:HGNC Symbol;Acc:HGNC:9672]	0.133267	0.641368	0.207786	0.835396	NA	-0.15032	0.664427	-0.22624	0.821015	0.897178
ENSG00000080166	0.0559416	DCT	dopachrome tautomerase [Source:HGNC Symbol;Acc:HGNC:2709]	-0.496372	5.94781	-0.0834547	0.93349	NA	-0.479968	5.94781	-0.0806966	0.935683	NA
ENSG00000080189	1022.92	SLC35C2	solute carrier family 35 member C2 [Source:HGNC Symbol;Acc:HGNC:17117]	0.022259	0.0541688	0.41092	0.681131	0.817159	-0.0468619	0.0544581	-0.860513	0.389507	0.562015
ENSG00000080200	340.818	CRYBG3	crystallin beta-gamma domain containing 3 [Source:HGNC Symbol;Acc:HGNC:34427]	0.140778	0.0835206	1.68555	0.0918826	0.216183	0.32077	0.0825754	3.88457	0.000102509	0.000431366
ENSG00000080224	365.58	EPHA6	EPH receptor A6 [Source:HGNC Symbol;Acc:HGNC:19296]	0.0271498	0.0704219	0.385531	0.699844	0.829604	0.281319	0.0688433	4.08637	4.38171e-05	0.000195245
ENSG00000080293	0.0881079	SCTR	secretin receptor [Source:HGNC Symbol;Acc:HGNC:10608]	-1.258	5.94529	-0.211597	0.832422	NA	-1.2416	5.94529	-0.208837	0.834575	NA
ENSG00000080298	278.849	RFX3	regulatory factor X3 [Source:HGNC Symbol;Acc:HGNC:9984]	0.340428	0.0855233	3.98053	6.87609e-05	0.000592775	0.364269	0.0854609	4.2624	2.0224e-05	9.43982e-05
ENSG00000080345	1583.82	RIF1	replication timing regulatory factor 1 [Source:HGNC Symbol;Acc:HGNC:23207]	0.279585	0.0478363	5.84462	5.07737e-09	1.11584e-07	0.288717	0.0478497	6.03382	1.60123e-09	1.18499e-08
ENSG00000080371	2209.23	RAB21	RAB21, member RAS oncogene family [Source:HGNC Symbol;Acc:HGNC:18263]	0.0735683	0.0371003	1.98296	0.0473723	0.132429	0.0848236	0.0371101	2.28572	0.0222704	0.0580563
ENSG00000080493	2337.05	SLC4A4	solute carrier family 4 member 4 [Source:HGNC Symbol;Acc:HGNC:11030]	0.119759	0.0396161	3.02298	0.00250302	0.0127404	-0.305373	0.0404568	-7.54813	4.41544e-14	4.83706e-13
ENSG00000080503	1525.61	SMARCA2	SWI/SNF related, matrix associated, actin dependent regulator of chromatin, subfamily a, member 2 [Source:HGNC Symbol;Acc:HGNC:11098]	-0.0118215	0.0404135	-0.292513	0.769894	0.874541	-0.211026	0.0411025	-5.13414	2.8344e-07	1.67456e-06
ENSG00000080511	0.11417	RDH8	retinol dehydrogenase 8 [Source:HGNC Symbol;Acc:HGNC:14423]	0.24389	5.94542	0.0410214	0.967279	NA	-1.16987	5.94713	-0.196712	0.844053	NA
ENSG00000080546	1478.98	SESN1	sestrin 1 [Source:HGNC Symbol;Acc:HGNC:21595]	-0.0898161	0.0515403	-1.74264	0.0813967	0.198685	0.242914	0.0505664	4.80387	1.55625e-06	8.3489e-06
ENSG00000080561	322.111	MID2	midline 2 [Source:HGNC Symbol;Acc:HGNC:7096]	-0.155403	0.0826686	-1.87984	0.0601303	0.157649	-0.274479	0.0838235	-3.27448	0.00105855	0.00376962
ENSG00000080572	2.30503	PIH1D3	PIH1 domain containing 3 [Source:HGNC Symbol;Acc:HGNC:28570]	0.551536	0.919849	0.599594	0.548777	NA	0.708281	0.90927	0.778956	0.436005	0.606046
ENSG00000080573	0.0976178	COL5A3	collagen type V alpha 3 chain [Source:HGNC Symbol;Acc:HGNC:14864]	0.22495	5.94781	0.0378206	0.969831	NA	-0.47998	5.94781	-0.0806987	0.935682	NA
ENSG00000080603	93.3335	SRCAP	Snf2 related CREBBP activator protein [Source:HGNC Symbol;Acc:HGNC:16974]	0.244119	0.133239	1.83219	0.066923	0.171196	0.396711	0.131412	3.01884	0.00253743	0.0084372
ENSG00000080608	755.934	PUM3	pumilio RNA binding family member 3 [Source:HGNC Symbol;Acc:HGNC:29676]	0.249976	0.0539811	4.6308	3.64259e-06	4.3871e-05	0.195426	0.0542606	3.60161	0.00031625	0.00123134
ENSG00000080618	0.532044	CPB2	carboxypeptidase B2 [Source:HGNC Symbol;Acc:HGNC:2300]	0.811708	1.96041	0.41405	0.678838	NA	0.22329	2.04803	0.109027	0.913181	NA
ENSG00000080644	11.9119	CHRNA3	cholinergic receptor nicotinic alpha 3 subunit [Source:HGNC Symbol;Acc:HGNC:1957]	0.303567	0.368311	0.824215	0.409818	NA	0.18551	0.372858	0.497535	0.618812	0.761651
ENSG00000080709	2314.62	KCNN2	potassium calcium-activated channel subfamily N member 2 [Source:HGNC Symbol;Acc:HGNC:6291]	0.160289	0.0411023	3.89975	9.6293e-05	0.000794236	0.209165	0.0410545	5.09481	3.49091e-07	2.04356e-06
ENSG00000080802	549.181	CNOT4	CCR4-NOT transcription complex subunit 4 [Source:HGNC Symbol;Acc:HGNC:7880]	0.169333	0.0633089	2.67472	0.00747923	0.0313556	0.160829	0.0634361	2.5353	0.0112352	0.0319594
ENSG00000080815	1464.76	PSEN1	presenilin 1 [Source:HGNC Symbol;Acc:HGNC:9508]	0.0183207	0.0365749	0.500911	0.616434	0.771822	-0.0985752	0.0370109	-2.66341	0.00773532	0.0229753
ENSG00000080819	476.247	CPOX	coproporphyrinogen oxidase [Source:HGNC Symbol;Acc:HGNC:2321]	-0.173747	0.0594435	-2.92289	0.00346803	0.0166861	-0.407817	0.0611537	-6.66872	2.58042e-11	2.2364e-10
ENSG00000080822	563.806	CLDND1	claudin domain containing 1 [Source:HGNC Symbol;Acc:HGNC:1322]	-0.0309279	0.0637423	-0.485202	0.627533	0.779399	-0.0322518	0.0638311	-0.505268	0.61337	0.757691
ENSG00000080823	121.801	MOK	MOK protein kinase [Source:HGNC Symbol;Acc:HGNC:9833]	-0.0895572	0.118213	-0.75759	0.448697	0.638625	-0.079386	0.118303	-0.671038	0.502196	0.664425
ENSG00000080824	31717.8	HSP90AA1	heat shock protein 90 alpha family class A member 1 [Source:HGNC Symbol;Acc:HGNC:5253]	-0.104476	0.0314122	-3.32595	0.000881162	0.0053716	0.123112	0.0313732	3.92412	8.70462e-05	0.000370965
ENSG00000080839	688.506	RBL1	RB transcriptional corepressor like 1 [Source:HGNC Symbol;Acc:HGNC:9893]	0.175418	0.0678537	2.58525	0.00973095	0.0384911	0.335461	0.0673564	4.98039	6.34579e-07	3.58463e-06
ENSG00000080845	716.128	DLGAP4	DLG associated protein 4 [Source:HGNC Symbol;Acc:HGNC:24476]	0.260049	0.0555418	4.68205	2.84021e-06	3.51396e-05	0.126479	0.05623	2.24931	0.0244929	0.0632028
ENSG00000080854	242.335	IGSF9B	immunoglobulin superfamily member 9B [Source:HGNC Symbol;Acc:HGNC:32326]	0.0345019	0.103511	0.333316	0.738896	0.855105	-0.586181	0.108856	-5.38491	7.24824e-08	4.58628e-07
ENSG00000080910	0	CFHR2	complement factor H related 2 [Source:HGNC Symbol;Acc:HGNC:4890]	NA	NA	NA	NA	NA	NA	NA	NA	NA	NA
ENSG00000080947	24.1371	CROCCP3	CROCC pseudogene 3 [Source:HGNC Symbol;Acc:HGNC:29405]	-0.261274	0.298493	-0.875309	0.381406	NA	-0.315783	0.300717	-1.0501	0.293672	0.462607
ENSG00000080986	1590.52	NDC80	NDC80 kinetochore complex component [Source:HGNC Symbol;Acc:HGNC:16909]	0.470152	0.047111	9.97966	1.87112e-23	2.16065e-21	1.2786	0.0456269	28.023	8.52402e-173	9.47557e-170
ENSG00000081014	315.19	AP4E1	adaptor related protein complex 4 subunit epsilon 1 [Source:HGNC Symbol;Acc:HGNC:573]	0.0300136	0.086488	0.347026	0.728572	0.849151	-0.0255816	0.0869531	-0.2942	0.768605	0.86529
ENSG00000081019	596.744	RSBN1	round spermatid basic protein 1 [Source:HGNC Symbol;Acc:HGNC:25642]	0.399861	0.0712011	5.61594	1.95494e-08	3.72969e-07	0.690534	0.070122	9.84761	7.01919e-23	1.34286e-21
ENSG00000081026	517.51	MAGI3	membrane associated guanylate kinase, WW and PDZ domain containing 3 [Source:HGNC Symbol;Acc:HGNC:29647]	0.19288	0.0622819	3.09689	0.00195564	0.0104143	0.393144	0.0612087	6.423	1.33613e-10	1.0854e-09
ENSG00000081041	0.120707	CXCL2	C-X-C motif chemokine ligand 2 [Source:HGNC Symbol;Acc:HGNC:4603]	-0.496398	5.50268	-0.0902103	0.92812	NA	0.973686	5.50191	0.176972	0.85953	NA
ENSG00000081051	1.42522	AFP	alpha fetoprotein [Source:HGNC Symbol;Acc:HGNC:317]	1.45857	1.31199	1.11172	0.266259	NA	1.26821	1.32951	0.953888	0.34014	0.512674
ENSG00000081052	1.52941	COL4A4	collagen type IV alpha 4 chain [Source:HGNC Symbol;Acc:HGNC:2206]	0.0792186	1.00258	0.0790149	0.937021	NA	-2.08353	1.34599	-1.54795	0.121635	0.240211
ENSG00000081059	25.6966	TCF7	transcription factor 7 [Source:HGNC Symbol;Acc:HGNC:11639]	0.241051	0.261728	0.920997	0.357052	0.5518	0.180954	0.263572	0.686543	0.492371	0.656815
ENSG00000081087	1141.75	OSTM1	osteoclastogenesis associated transmembrane protein 1 [Source:HGNC Symbol;Acc:HGNC:21652]	-0.0591809	0.0459252	-1.28864	0.197524	0.371459	0.0769957	0.0454898	1.69259	0.0905329	0.189396
ENSG00000081138	35.7702	CDH7	cadherin 7 [Source:HGNC Symbol;Acc:HGNC:1766]	0.419705	0.265573	1.58037	0.114021	0.252903	0.474687	0.26484	1.79235	0.0730768	0.159152
ENSG00000081148	1.34321	IMPG2	interphotoreceptor matrix proteoglycan 2 [Source:HGNC Symbol;Acc:HGNC:18362]	0.215974	1.66591	0.129643	0.896849	NA	2.2377	1.42073	1.57503	0.115249	0.230073
ENSG00000081154	3056.24	PCNP	PEST proteolytic signal containing nuclear protein [Source:HGNC Symbol;Acc:HGNC:30023]	-0.0365338	0.027991	-1.3052	0.191825	0.363926	0.420998	0.0270539	15.5615	1.32984e-54	1.08866e-52
ENSG00000081177	850.697	EXD2	exonuclease 3'-5' domain containing 2 [Source:HGNC Symbol;Acc:HGNC:20217]	-0.0176396	0.0472562	-0.373276	0.708943	0.83535	0.0914043	0.0468212	1.9522	0.0509147	0.117836
ENSG00000081181	904.92	ARG2	arginase 2 [Source:HGNC Symbol;Acc:HGNC:664]	0.0339551	0.0460285	0.737696	0.460699	0.650295	0.354557	0.0447684	7.91981	2.37882e-15	2.87432e-14
ENSG00000081189	0.30818	MEF2C	myocyte enhancer factor 2C [Source:HGNC Symbol;Acc:HGNC:6996]	1.94155	3.04014	0.638636	0.523059	NA	-0.480012	3.1242	-0.153644	0.877891	NA
ENSG00000081237	0.974668	PTPRC	protein tyrosine phosphatase receptor type C [Source:HGNC Symbol;Acc:HGNC:9666]	0.20484	1.77728	0.115255	0.908243	NA	0.818029	1.68301	0.486052	0.626931	NA
ENSG00000081248	1.07324	CACNA1S	calcium voltage-gated channel subunit alpha1 S [Source:HGNC Symbol;Acc:HGNC:1397]	-3.19586	1.43809	-2.2223	0.026263	NA	-3.17946	1.43809	-2.21089	0.0270432	NA
ENSG00000081277	29.3426	PKP1	plakophilin 1 [Source:HGNC Symbol;Acc:HGNC:9023]	0.343783	0.231224	1.4868	0.137069	0.288884	1.05621	0.220319	4.79401	1.63478e-06	8.73688e-06
ENSG00000081307	1353.8	UBA5	ubiquitin like modifier activating enzyme 5 [Source:HGNC Symbol;Acc:HGNC:23230]	-0.0663423	0.0384835	-1.72392	0.0847228	0.204389	0.00415539	0.0382843	0.10854	0.913567	0.95284
ENSG00000081320	286.138	STK17B	serine/threonine kinase 17b [Source:HGNC Symbol;Acc:HGNC:11396]	0.289576	0.0934546	3.09858	0.00194451	0.0103676	0.559811	0.0921268	6.07653	1.22813e-09	9.20158e-09
ENSG00000081377	324.006	CDC14B	cell division cycle 14B [Source:HGNC Symbol;Acc:HGNC:1719]	-0.00638307	0.0774672	-0.082397	0.934331	0.968812	-0.333215	0.0798782	-4.17154	3.0255e-05	0.000137689
ENSG00000081386	361.474	ZNF510	zinc finger protein 510 [Source:HGNC Symbol;Acc:HGNC:29161]	-0.0684659	0.0666136	-1.02781	0.304041	0.496883	-0.202551	0.0678397	-2.98572	0.00282908	0.00931168
ENSG00000081479	0.969502	LRP2	LDL receptor related protein 2 [Source:HGNC Symbol;Acc:HGNC:6694]	-0.552768	1.59566	-0.34642	0.729027	NA	-1.09017	1.69521	-0.64309	0.520166	NA
ENSG00000081665	334.731	ZNF506	zinc finger protein 506 [Source:HGNC Symbol;Acc:HGNC:23780]	-0.107524	0.0841933	-1.27711	0.201562	0.376952	-0.120574	0.0843866	-1.42883	0.153054	0.287041
ENSG00000081692	209.929	JMJD4	jumonji domain containing 4 [Source:HGNC Symbol;Acc:HGNC:25724]	0.145943	0.0932182	1.56561	0.11744	0.258194	-0.238268	0.0971008	-2.45382	0.0141349	0.0389999
ENSG00000081721	415.127	DUSP12	dual specificity phosphatase 12 [Source:HGNC Symbol;Acc:HGNC:3067]	0.0349665	0.0713483	0.490081	0.624076	0.776255	0.248528	0.0701566	3.54248	0.00039638	0.00151803
ENSG00000081760	1771.19	AACS	acetoacetyl-CoA synthetase [Source:HGNC Symbol;Acc:HGNC:21298]	-0.162465	0.0360979	-4.50068	6.77354e-06	7.58867e-05	-0.412142	0.0369686	-11.1484	7.28837e-29	1.87729e-27
ENSG00000081791	1291.05	DELE1	DAP3 binding cell death enhancer 1 [Source:HGNC Symbol;Acc:HGNC:28969]	0.0687364	0.0439047	1.56558	0.117446	0.258194	0.0223822	0.0441082	0.507439	0.611847	0.756694
ENSG00000081800	0.784971	SLC13A1	solute carrier family 13 member 1 [Source:HGNC Symbol;Acc:HGNC:10916]	-0.828077	1.57612	-0.525388	0.599313	NA	-0.363502	1.51501	-0.239933	0.810382	NA
ENSG00000081803	708	CADPS2	calcium dependent secretion activator 2 [Source:HGNC Symbol;Acc:HGNC:16018]	-0.0365405	0.0583181	-0.626572	0.53094	0.70749	-0.839253	0.0620859	-13.5176	1.23115e-41	5.79135e-40
ENSG00000081818	21.0761	PCDHB4	protocadherin beta 4 [Source:HGNC Symbol;Acc:HGNC:8689]	-0.02449	0.299218	-0.0818467	0.934769	NA	0.102669	0.295696	0.347211	0.728433	0.83699
ENSG00000081842	0.498927	PCDHA6	protocadherin alpha 6 [Source:HGNC Symbol;Acc:HGNC:8672]	1.56714	2.08686	0.750956	0.452679	NA	-1.1781	2.2312	-0.528011	0.597492	NA
ENSG00000081853	28.0425	PCDHGA2	protocadherin gamma subfamily A, 2 [Source:HGNC Symbol;Acc:HGNC:8700]	-0.0883011	0.285772	-0.308991	0.757328	0.866383	-0.875114	0.309821	-2.82458	0.00473427	0.0148511
ENSG00000081870	752.467	HSPB11	heat shock protein family B (small) member 11 [Source:HGNC Symbol;Acc:HGNC:25019]	-0.135159	0.0532164	-2.5398	0.0110916	0.042982	-0.00044506	0.0526664	-0.00845055	0.993258	0.996087
ENSG00000081913	428.847	PHLPP1	PH domain and leucine rich repeat protein phosphatase 1 [Source:HGNC Symbol;Acc:HGNC:20610]	0.00853445	0.0692014	0.123328	0.901848	0.952344	0.185284	0.0682037	2.71663	0.00659507	0.0199362
ENSG00000081923	1054.01	ATP8B1	ATPase phospholipid transporting 8B1 [Source:HGNC Symbol;Acc:HGNC:3706]	0.108755	0.0451596	2.40824	0.0160295	0.0576694	-0.0438471	0.0458577	-0.956155	0.338994	0.511969
ENSG00000081985	2.51625	IL12RB2	interleukin 12 receptor subunit beta 2 [Source:HGNC Symbol;Acc:HGNC:5972]	0.679769	0.879163	0.773199	0.439404	NA	1.40964	0.836082	1.68601	0.0917944	0.191391
ENSG00000082014	108.528	SMARCD3	SWI/SNF related, matrix associated, actin dependent regulator of chromatin, subfamily d, member 3 [Source:HGNC Symbol;Acc:HGNC:11108]	-0.577486	0.156128	-3.6988	0.000216619	0.00161837	-1.07981	0.165029	-6.54316	6.02314e-11	5.03821e-10
ENSG00000082068	592.855	WDR70	WD repeat domain 70 [Source:HGNC Symbol;Acc:HGNC:25495]	-0.074211	0.060313	-1.23043	0.218536	0.399169	-0.105323	0.0605688	-1.7389	0.0820522	0.175124
ENSG00000082074	0.0325066	FYB1	FYN binding protein 1 [Source:HGNC Symbol;Acc:HGNC:4036]	0	5.94781	0	1	NA	0.9626	5.94781	0.161841	0.871431	NA
ENSG00000082126	0.465117	MPP4	membrane palmitoylated protein 4 [Source:HGNC Symbol;Acc:HGNC:13680]	0.979535	2.39827	0.408434	0.682955	NA	1.54107	2.33332	0.660461	0.508958	NA
ENSG00000082146	732.025	STRADB	STE20 related adaptor beta [Source:HGNC Symbol;Acc:HGNC:13205]	-0.172025	0.0515099	-3.33966	0.000838822	0.00515993	-0.306536	0.0523376	-5.8569	4.71591e-09	3.35257e-08
ENSG00000082153	6199.2	BZW1	basic leucine zipper and W2 domains 1 [Source:HGNC Symbol;Acc:HGNC:18380]	0.0326868	0.0287414	1.13727	0.255425	0.442657	-0.143619	0.0289448	-4.96185	6.98263e-07	3.92966e-06
ENSG00000082175	9.78235	PGR	progesterone receptor [Source:HGNC Symbol;Acc:HGNC:8910]	0.0210536	0.484205	0.0434808	0.965318	NA	-0.143408	0.495119	-0.289644	0.772088	0.86787
ENSG00000082196	23.1574	C1QTNF3	C1q and TNF related 3 [Source:HGNC Symbol;Acc:HGNC:14326]	0.0270302	0.283381	0.095385	0.924009	NA	-0.229396	0.293425	-0.781786	0.43434	0.604607
ENSG00000082212	1560.87	ME2	malic enzyme 2 [Source:HGNC Symbol;Acc:HGNC:6984]	-0.0464136	0.0399651	-1.16135	0.245498	0.43182	-0.0635494	0.0400708	-1.58593	0.112756	0.226122
ENSG00000082213	1323.8	C5orf22	chromosome 5 open reading frame 22 [Source:HGNC Symbol;Acc:HGNC:25639]	0.128413	0.0515237	2.4923	0.0126919	0.0478179	0.241348	0.0512733	4.70709	2.51272e-06	1.31854e-05
ENSG00000082258	1121.96	CCNT2	cyclin T2 [Source:HGNC Symbol;Acc:HGNC:1600]	0.0523954	0.0480598	1.09021	0.275619	0.465243	-0.0133996	0.0483443	-0.27717	0.78165	0.873836
ENSG00000082269	917.163	FAM135A	family with sequence similarity 135 member A [Source:HGNC Symbol;Acc:HGNC:21084]	-0.0472741	0.0541325	-0.873303	0.382498	0.577961	-0.298296	0.0550497	-5.41867	6.00431e-08	3.83249e-07
ENSG00000082293	0.173355	COL19A1	collagen type XIX alpha 1 chain [Source:HGNC Symbol;Acc:HGNC:2196]	-0.496414	4.94244	-0.100439	0.919996	NA	-0.48001	4.94244	-0.0971201	0.922631	NA
ENSG00000082397	44.3071	EPB41L3	erythrocyte membrane protein band 4.1 like 3 [Source:HGNC Symbol;Acc:HGNC:3380]	0.219084	0.18264	1.19954	0.230319	0.41431	-0.524944	0.19918	-2.63553	0.00840067	0.0247014
ENSG00000082438	3450.22	COBLL1	cordon-bleu WH2 repeat protein like 1 [Source:HGNC Symbol;Acc:HGNC:23571]	0.0170962	0.0414039	0.412912	0.679671	0.816565	0.423168	0.0408685	10.3544	3.9973e-25	8.51936e-24
ENSG00000082458	1777.21	DLG3	discs large MAGUK scaffold protein 3 [Source:HGNC Symbol;Acc:HGNC:2902]	0.086085	0.0355246	2.42325	0.0153823	0.0557216	0.37555	0.0347428	10.8094	3.10609e-27	7.34644e-26
ENSG00000082482	0	KCNK2	potassium two pore domain channel subfamily K member 2 [Source:HGNC Symbol;Acc:HGNC:6277]	NA	NA	NA	NA	NA	NA	NA	NA	NA	NA
ENSG00000082497	8.88716	SERTAD4	SERTA domain containing 4 [Source:HGNC Symbol;Acc:HGNC:25236]	0.547747	0.512782	1.06819	0.285436	NA	1.35713	0.490738	2.76548	0.00568397	0.0174645
ENSG00000082512	14.3414	TRAF5	TNF receptor associated factor 5 [Source:HGNC Symbol;Acc:HGNC:12035]	-0.00343454	0.346971	-0.00989865	0.992102	NA	-0.464617	0.3649	-1.27327	0.202922	0.355264
ENSG00000082515	977.325	MRPL22	mitochondrial ribosomal protein L22 [Source:HGNC Symbol;Acc:HGNC:14480]	0.0921931	0.0473251	1.94808	0.0514053	0.140891	0.386269	0.0462875	8.345	7.12117e-17	9.53749e-16
ENSG00000082516	801.414	GEMIN5	gem nuclear organelle associated protein 5 [Source:HGNC Symbol;Acc:HGNC:20043]	0.323755	0.0583707	5.54653	2.91391e-08	5.41026e-07	0.0572912	0.059385	0.964741	0.334674	0.507704
ENSG00000082556	80.3648	OPRK1	opioid receptor kappa 1 [Source:HGNC Symbol;Acc:HGNC:8154]	0.374433	0.245882	1.52282	0.127804	0.275149	1.67624	0.216366	7.74724	9.3915e-15	1.07803e-13
ENSG00000082641	5439.15	NFE2L1	nuclear factor, erythroid 2 like 1 [Source:HGNC Symbol;Acc:HGNC:7781]	-0.119187	0.0232836	-5.11894	3.07261e-07	4.66527e-06	-0.401386	0.0237734	-16.8838	5.91958e-64	6.65039e-62
ENSG00000082684	0.483432	SEMA5B	semaphorin 5B [Source:HGNC Symbol;Acc:HGNC:10737]	-0.487396	2.23098	-0.218467	0.827065	NA	1.25432	2.11081	0.594235	0.552355	NA
ENSG00000082701	2940.02	GSK3B	glycogen synthase kinase 3 beta [Source:HGNC Symbol;Acc:HGNC:4617]	0.06083	0.0390461	1.5579	0.119256	0.261038	0.280082	0.0387013	7.23702	4.58639e-13	4.63046e-12
ENSG00000082781	873.204	ITGB5	integrin subunit beta 5 [Source:HGNC Symbol;Acc:HGNC:6160]	0.00792528	0.0457975	0.17305	0.862612	0.928261	-0.579416	0.0488866	-11.8523	2.09474e-32	6.49678e-31
ENSG00000082805	877.034	ERC1	ELKS/RAB6-interacting/CAST family member 1 [Source:HGNC Symbol;Acc:HGNC:17072]	0.25674	0.0490545	5.23377	1.66083e-07	2.66623e-06	0.198672	0.0493538	4.02547	5.6861e-05	0.000249369
ENSG00000082898	4298.84	XPO1	exportin 1 [Source:HGNC Symbol;Acc:HGNC:12825]	0.13364	0.0305756	4.3708	1.23793e-05	0.000130368	0.489675	0.0301298	16.2522	2.15628e-59	2.08911e-57
ENSG00000082929	1.04891	LINC01587	long intergenic non-protein coding RNA 1587 [Source:HGNC Symbol;Acc:HGNC:13716]	-1.81015	1.62242	-1.11571	0.264548	NA	0.511712	1.39237	0.367513	0.713237	NA
ENSG00000082996	679.678	RNF13	ring finger protein 13 [Source:HGNC Symbol;Acc:HGNC:10057]	-0.087219	0.0602238	-1.44825	0.147548	0.305108	0.0804259	0.0595389	1.35081	0.176756	0.320947
ENSG00000083067	3.24802	TRPM3	transient receptor potential cation channel subfamily M member 3 [Source:HGNC Symbol;Acc:HGNC:17992]	-0.11274	0.74083	-0.152181	0.879044	NA	-0.0892113	0.740444	-0.120484	0.9041	0.947903
ENSG00000083093	243.128	PALB2	partner and localizer of BRCA2 [Source:HGNC Symbol;Acc:HGNC:26144]	0.030303	0.0964611	0.314148	0.753409	0.864002	0.127465	0.0958547	1.32977	0.183593	0.329902
ENSG00000083097	553.18	DOP1A	DOP1 leucine zipper like protein A [Source:HGNC Symbol;Acc:HGNC:21194]	0.0526685	0.0677665	0.777204	0.437038	0.627948	0.320576	0.0665694	4.81566	1.46714e-06	7.90496e-06
ENSG00000083099	893.642	LYRM2	LYR motif containing 2 [Source:HGNC Symbol;Acc:HGNC:25229]	0.118577	0.0504432	2.3507	0.0187383	0.065075	-0.0292684	0.0510985	-0.572784	0.566791	0.71965
ENSG00000083123	946.901	BCKDHB	branched chain keto acid dehydrogenase E1 subunit beta [Source:HGNC Symbol;Acc:HGNC:987]	-0.237345	0.0525184	-4.51927	6.20535e-06	7.05416e-05	-0.529127	0.053866	-9.82302	8.96166e-23	1.70449e-21
ENSG00000083168	2108.02	KAT6A	lysine acetyltransferase 6A [Source:HGNC Symbol;Acc:HGNC:13013]	0.288513	0.0398929	7.23219	4.75268e-13	2.03131e-11	0.622224	0.0393034	15.8313	1.89344e-56	1.63899e-54
ENSG00000083223	1262.83	TUT7	terminal uridylyl transferase 7 [Source:HGNC Symbol;Acc:HGNC:25817]	0.143866	0.0546575	2.63214	0.0084848	0.0346597	0.041719	0.0549231	0.75959	0.4475	0.616224
ENSG00000083290	566.332	ULK2	unc-51 like autophagy activating kinase 2 [Source:HGNC Symbol;Acc:HGNC:13480]	-0.126045	0.0635354	-1.98386	0.0472717	0.132204	-0.121621	0.063597	-1.91237	0.0558284	0.127091
ENSG00000083307	4067.41	GRHL2	grainyhead like transcription factor 2 [Source:HGNC Symbol;Acc:HGNC:2799]	0.0276101	0.033937	0.813572	0.41589	0.609325	-0.0884431	0.0341043	-2.59332	0.00950554	0.0275551
ENSG00000083312	5603.44	TNPO1	transportin 1 [Source:HGNC Symbol;Acc:HGNC:6401]	0.277541	0.0376622	7.36922	1.71634e-13	7.73766e-12	0.47858	0.0375213	12.7549	2.92814e-37	1.12242e-35
ENSG00000083444	2379.57	PLOD1	procollagen-lysine,2-oxoglutarate 5-dioxygenase 1 [Source:HGNC Symbol;Acc:HGNC:9081]	-0.138394	0.0396985	-3.48614	0.000490051	0.00329302	-0.496941	0.0405331	-12.2601	1.48244e-34	5.08288e-33
ENSG00000083454	10.8632	P2RX5	purinergic receptor P2X 5 [Source:HGNC Symbol;Acc:HGNC:8536]	0.595645	0.402066	1.48146	0.138484	NA	-0.0661672	0.433231	-0.15273	0.878611	0.932801
ENSG00000083457	575.283	ITGAE	integrin subunit alpha E [Source:HGNC Symbol;Acc:HGNC:6147]	-0.128619	0.0629299	-2.04385	0.0409685	0.118426	-0.249204	0.0636734	-3.91378	9.08609e-05	0.000385743
ENSG00000083520	676.72	DIS3	DIS3 homolog, exosome endoribonuclease and 3'-5' exoribonuclease [Source:HGNC Symbol;Acc:HGNC:20604]	0.135534	0.0534182	2.53723	0.0111733	0.0431326	0.0847936	0.0537458	1.57768	0.11464	0.229117
ENSG00000083535	89.6592	PIBF1	progesterone immunomodulatory binding factor 1 [Source:HGNC Symbol;Acc:HGNC:23352]	0.147627	0.149757	0.985779	0.324241	0.518699	0.519218	0.14541	3.57071	0.00035602	0.00137342
ENSG00000083544	445.675	TDRD3	tudor domain containing 3 [Source:HGNC Symbol;Acc:HGNC:20612]	0.147169	0.0701722	2.09725	0.0359716	0.107037	0.0181183	0.0710515	0.255002	0.798722	0.884025
ENSG00000083622	0	AC000061.1	novel transcript, antisense to CFTR	NA	NA	NA	NA	NA	NA	NA	NA	NA	NA
ENSG00000083635	278.631	NUFIP1	nuclear FMR1 interacting protein 1 [Source:HGNC Symbol;Acc:HGNC:8057]	0.118984	0.0854058	1.39316	0.163572	0.326351	0.149308	0.0853081	1.75023	0.0800793	0.171708
ENSG00000083642	1597.39	PDS5B	PDS5 cohesin associated factor B [Source:HGNC Symbol;Acc:HGNC:20418]	0.292265	0.0499923	5.84621	5.02887e-09	1.10888e-07	0.831727	0.0490565	16.9545	1.78366e-64	2.06993e-62
ENSG00000083720	2838.92	OXCT1	3-oxoacid CoA-transferase 1 [Source:HGNC Symbol;Acc:HGNC:8527]	-0.0974038	0.0343233	-2.83783	0.0045421	0.020868	0.118133	0.0339551	3.47911	0.000503085	0.00189812
ENSG00000083750	217.141	RRAGB	Ras related GTP binding B [Source:HGNC Symbol;Acc:HGNC:19901]	-0.0527958	0.0933978	-0.565278	0.571885	0.740242	-0.305735	0.0961461	-3.1799	0.00147326	0.00511117
ENSG00000083782	0	EPYC	epiphycan [Source:HGNC Symbol;Acc:HGNC:3053]	NA	NA	NA	NA	NA	NA	NA	NA	NA	NA
ENSG00000083799	901.189	CYLD	CYLD lysine 63 deubiquitinase [Source:HGNC Symbol;Acc:HGNC:2584]	-0.00808241	0.045995	-0.175724	0.860511	0.927248	0.0135966	0.0459721	0.295758	0.767415	0.864501
ENSG00000083807	396.971	SLC27A5	solute carrier family 27 member 5 [Source:HGNC Symbol;Acc:HGNC:10999]	-0.169814	0.0754613	-2.25035	0.0244268	0.0800882	-0.225921	0.0759488	-2.97465	0.00293324	0.00960959
ENSG00000083812	243.262	ZNF324	zinc finger protein 324 [Source:HGNC Symbol;Acc:HGNC:14096]	-0.0521481	0.10243	-0.509109	0.610676	0.767704	-0.181749	0.103584	-1.7546	0.0793279	0.170377
ENSG00000083814	163.8	ZNF671	zinc finger protein 671 [Source:HGNC Symbol;Acc:HGNC:26279]	0.0913498	0.0982169	0.930083	0.352328	0.547442	-0.297397	0.103164	-2.88275	0.00394217	0.0125679
ENSG00000083817	120.326	ZNF416	zinc finger protein 416 [Source:HGNC Symbol;Acc:HGNC:20645]	0.124049	0.113869	1.0894	0.275979	0.465629	-0.0319599	0.11619	-0.275065	0.783266	0.874704
ENSG00000083828	280.745	ZNF586	zinc finger protein 586 [Source:HGNC Symbol;Acc:HGNC:25949]	0.352385	0.078097	4.51215	6.41745e-06	7.26391e-05	0.482326	0.0772808	6.24121	4.34203e-10	3.38531e-09
ENSG00000083838	173.547	ZNF446	zinc finger protein 446 [Source:HGNC Symbol;Acc:HGNC:21036]	0.191562	0.107772	1.77748	0.0754899	0.187535	-0.0876287	0.110656	-0.791904	0.428417	0.599173
ENSG00000083844	683.993	ZNF264	zinc finger protein 264 [Source:HGNC Symbol;Acc:HGNC:13057]	0.0308124	0.0587034	0.524882	0.599665	0.759549	0.164645	0.0581567	2.83106	0.00463945	0.0145775
ENSG00000083845	15867.5	RPS5	ribosomal protein S5 [Source:HGNC Symbol;Acc:HGNC:10426]	-0.0771946	0.0373163	-2.06866	0.038578	0.112829	0.0965191	0.0372654	2.59005	0.00959633	0.0277878
ENSG00000083857	2879.33	FAT1	FAT atypical cadherin 1 [Source:HGNC Symbol;Acc:HGNC:3595]	0.0591049	0.0812741	0.727229	0.467086	0.656143	0.0168214	0.0813115	0.206877	0.836106	0.905205
ENSG00000083896	1925.88	YTHDC1	YTH domain containing 1 [Source:HGNC Symbol;Acc:HGNC:30626]	0.149422	0.03149	4.74507	2.08433e-06	2.66908e-05	0.411043	0.0308156	13.3388	1.37687e-40	6.1743e-39
ENSG00000083937	1520.92	CHMP2B	charged multivesicular body protein 2B [Source:HGNC Symbol;Acc:HGNC:24537]	0.0247694	0.0417296	0.593567	0.552801	0.725821	0.163291	0.0413756	3.94656	7.92829e-05	0.000339938
ENSG00000084070	1421.19	SMAP2	small ArfGAP2 [Source:HGNC Symbol;Acc:HGNC:25082]	0.101366	0.0353304	2.86909	0.00411657	0.0191825	-0.118306	0.036239	-3.26459	0.00109622	0.00389325
ENSG00000084072	1074.26	PPIE	peptidylprolyl isomerase E [Source:HGNC Symbol;Acc:HGNC:9258]	0.138894	0.0424125	3.27483	0.00105724	0.00623267	0.738361	0.0401955	18.3693	2.31521e-75	3.59555e-73
ENSG00000084073	2898.89	ZMPSTE24	zinc metallopeptidase STE24 [Source:HGNC Symbol;Acc:HGNC:12877]	-0.121979	0.0376703	-3.23808	0.00120338	0.00693579	-0.183881	0.0378125	-4.86297	1.15638e-06	6.3225e-06
ENSG00000084090	5269.91	STARD7	StAR related lipid transfer domain containing 7 [Source:HGNC Symbol;Acc:HGNC:18063]	0.084653	0.0306272	2.76398	0.00571002	0.0252576	0.102497	0.0306244	3.34692	0.000817157	0.00297009
ENSG00000084092	1235.78	NOA1	nitric oxide associated 1 [Source:HGNC Symbol;Acc:HGNC:28473]	0.0898999	0.0434615	2.0685	0.0385933	0.11283	0.189712	0.0431798	4.39355	1.11517e-05	5.38611e-05
ENSG00000084093	1551.46	REST	RE1 silencing transcription factor [Source:HGNC Symbol;Acc:HGNC:9966]	0.183892	0.0474693	3.87391	0.000107103	0.000874086	0.311341	0.0472093	6.5949	4.25554e-11	3.6155e-10
ENSG00000084110	0.425822	HAL	histidine ammonia-lyase [Source:HGNC Symbol;Acc:HGNC:4806]	0	2.7582	0	1	NA	1.69121	2.75691	0.613445	0.539582	NA
ENSG00000084112	871.571	SSH1	slingshot protein phosphatase 1 [Source:HGNC Symbol;Acc:HGNC:30579]	-0.110131	0.0509059	-2.16343	0.0305084	0.094586	-0.0702764	0.0508069	-1.38321	0.166602	0.306729
ENSG00000084207	0.0829202	GSTP1	glutathione S-transferase pi 1 [Source:HGNC Symbol;Acc:HGNC:4638]	-1.22322	5.9463	-0.20571	0.837017	NA	-1.20681	5.9463	-0.202952	0.839173	NA
ENSG00000084234	11178.2	APLP2	amyloid beta precursor like protein 2 [Source:HGNC Symbol;Acc:HGNC:598]	-0.119119	0.0203977	-5.83984	5.22525e-09	1.14243e-07	-0.124059	0.0204144	-6.07702	1.22434e-09	9.17975e-09
ENSG00000084444	725.143	FAM234B	family with sequence similarity 234 member B [Source:HGNC Symbol;Acc:HGNC:29288]	-0.0869931	0.0575371	-1.51195	0.130547	0.279026	-0.361923	0.0588989	-6.14482	8.00546e-10	6.09309e-09
ENSG00000084453	0.0283639	SLCO1A2	solute carrier organic anion transporter family member 1A2 [Source:HGNC Symbol;Acc:HGNC:10956]	-0.496359	5.94781	-0.0834525	0.933492	NA	-0.479955	5.94781	-0.0806945	0.935685	NA
ENSG00000084463	2479.26	WBP11	WW domain binding protein 11 [Source:HGNC Symbol;Acc:HGNC:16461]	0.136232	0.0396294	3.43764	0.000586808	0.00383933	0.349362	0.039294	8.89099	6.05662e-19	9.33055e-18
ENSG00000084623	8765.47	EIF3I	eukaryotic translation initiation factor 3 subunit I [Source:HGNC Symbol;Acc:HGNC:3272]	-0.0441373	0.0269742	-1.63628	0.101782	0.233196	0.152041	0.0268399	5.66474	1.4725e-08	9.92995e-08
ENSG00000084628	6.44712	NKAIN1	sodium/potassium transporting ATPase interacting 1 [Source:HGNC Symbol;Acc:HGNC:25743]	0.779805	0.490541	1.58968	0.111906	NA	-0.367735	0.555414	-0.662092	0.507912	0.669597
ENSG00000084636	20.4087	COL16A1	collagen type XVI alpha 1 chain [Source:HGNC Symbol;Acc:HGNC:2193]	-0.22261	0.348645	-0.638502	0.523147	NA	-0.75375	0.373253	-2.01941	0.0434445	0.10317
ENSG00000084652	3139.55	TXLNA	taxilin alpha [Source:HGNC Symbol;Acc:HGNC:30685]	0.165809	0.0280098	5.91968	3.22561e-09	7.50211e-08	0.015867	0.0283407	0.559866	0.575571	0.727811
ENSG00000084674	0	APOB	apolipoprotein B [Source:HGNC Symbol;Acc:HGNC:603]	NA	NA	NA	NA	NA	NA	NA	NA	NA	NA
ENSG00000084676	2065.89	NCOA1	nuclear receptor coactivator 1 [Source:HGNC Symbol;Acc:HGNC:7668]	0.00866926	0.0424721	0.204117	0.838262	0.914771	0.121752	0.0422769	2.87986	0.0039785	0.0126704
ENSG00000084693	803.464	AGBL5	ATP/GTP binding protein like 5 [Source:HGNC Symbol;Acc:HGNC:26147]	-0.126863	0.0563339	-2.25199	0.0243231	0.0798807	-0.225348	0.0568496	-3.96392	7.37278e-05	0.000317603
ENSG00000084710	74.9872	EFR3B	EFR3 homolog B [Source:HGNC Symbol;Acc:HGNC:29155]	-0.102418	0.144615	-0.708214	0.478812	0.665769	-0.69934	0.156419	-4.47095	7.78722e-06	3.83032e-05
ENSG00000084731	178.677	KIF3C	kinesin family member 3C [Source:HGNC Symbol;Acc:HGNC:6321]	0.0596006	0.10583	0.563176	0.573315	0.741368	-0.157385	0.108791	-1.44668	0.147986	0.280022
ENSG00000084733	7465.54	RAB10	RAB10, member RAS oncogene family [Source:HGNC Symbol;Acc:HGNC:9759]	0.0691718	0.0219138	3.15654	0.00159653	0.00877159	0.316867	0.0216559	14.6319	1.75683e-48	1.12103e-46
ENSG00000084734	8.60988	GCKR	glucokinase regulator [Source:HGNC Symbol;Acc:HGNC:4196]	-0.615219	0.54229	-1.13448	0.256592	NA	-0.401952	0.529974	-0.758438	0.448189	0.616788
ENSG00000084754	4495.07	HADHA	hydroxyacyl-CoA dehydrogenase trifunctional multienzyme complex subunit alpha [Source:HGNC Symbol;Acc:HGNC:4801]	-0.106672	0.029776	-3.58248	0.00034035	0.0024088	-0.0769091	0.0297548	-2.58477	0.00974448	0.0281473
ENSG00000084764	547.202	MAPRE3	microtubule associated protein RP/EB family member 3 [Source:HGNC Symbol;Acc:HGNC:6892]	0.05943	0.0593085	1.00205	0.316321	0.510225	0.0109655	0.0596912	0.183704	0.854246	0.917462
ENSG00000084774	1949.73	CAD	carbamoyl-phosphate synthetase 2, aspartate transcarbamylase, and dihydroorotase [Source:HGNC Symbol;Acc:HGNC:1424]	0.126882	0.0431393	2.94123	0.00326916	0.0159036	0.279234	0.0428674	6.5139	7.32262e-11	6.09142e-10
ENSG00000085063	745.486	CD59	CD59 molecule (CD59 blood group) [Source:HGNC Symbol;Acc:HGNC:1689]	-0.0456455	0.0542232	-0.841806	0.399896	0.594796	0.218189	0.053017	4.11546	3.86413e-05	0.0001735
ENSG00000085117	96.7021	CD82	CD82 molecule [Source:HGNC Symbol;Acc:HGNC:6210]	0.069859	0.140678	0.496588	0.61948	0.773703	-0.350656	0.147824	-2.37212	0.0176862	0.0474109
ENSG00000085185	142.931	BCORL1	BCL6 corepressor like 1 [Source:HGNC Symbol;Acc:HGNC:25657]	0.139568	0.133723	1.0437	0.296622	0.488886	0.364268	0.131664	2.76665	0.00566348	0.0174142
ENSG00000085224	3264.67	ATRX	ATRX chromatin remodeler [Source:HGNC Symbol;Acc:HGNC:886]	0.144631	0.059463	2.43229	0.0150037	0.0546304	0.528976	0.0591281	8.94626	3.67714e-19	5.74444e-18
ENSG00000085231	461.286	AK6	adenylate kinase 6 [Source:HGNC Symbol;Acc:HGNC:49151]	0.168114	0.0710338	2.36668	0.0179483	0.0629554	0.125102	0.0713607	1.75309	0.0795861	0.17081
ENSG00000085265	0	FCN1	ficolin 1 [Source:HGNC Symbol;Acc:HGNC:3623]	NA	NA	NA	NA	NA	NA	NA	NA	NA	NA
ENSG00000085274	984.448	MYNN	myoneurin [Source:HGNC Symbol;Acc:HGNC:14955]	0.270463	0.0542436	4.98609	6.16146e-07	8.79712e-06	0.835431	0.0515816	16.1963	5.35381e-59	5.11664e-57
ENSG00000085276	28.4394	MECOM	MDS1 and EVI1 complex locus [Source:HGNC Symbol;Acc:HGNC:3498]	0.0458633	0.352815	0.129992	0.896572	0.949058	0.888978	0.323044	2.75188	0.00592539	0.0181403
ENSG00000085365	2814.92	SCAMP1	secretory carrier membrane protein 1 [Source:HGNC Symbol;Acc:HGNC:10563]	0.000386838	0.0350661	0.0110317	0.991198	0.995202	0.165583	0.0347905	4.75944	1.94133e-06	1.02944e-05
ENSG00000085377	816.255	PREP	prolyl endopeptidase [Source:HGNC Symbol;Acc:HGNC:9358]	-0.0102759	0.0475755	-0.215991	0.828995	0.909903	-0.114999	0.0481375	-2.38897	0.0168959	0.0455699
ENSG00000085382	311.283	HACE1	HECT domain and ankyrin repeat containing E3 ubiquitin protein ligase 1 [Source:HGNC Symbol;Acc:HGNC:21033]	-0.162341	0.0915175	-1.77388	0.0760834	0.188654	-0.151241	0.0915504	-1.652	0.098535	0.202546
ENSG00000085415	1919.02	SEH1L	SEH1 like nucleoporin [Source:HGNC Symbol;Acc:HGNC:30379]	0.185122	0.0397451	4.65775	3.19689e-06	3.90389e-05	0.198512	0.0397506	4.99393	5.91627e-07	3.35636e-06
ENSG00000085433	480.951	WDR47	WD repeat domain 47 [Source:HGNC Symbol;Acc:HGNC:29141]	0.146071	0.0652808	2.23758	0.0252482	0.0820661	0.322324	0.0644512	5.00106	5.70172e-07	3.24336e-06
ENSG00000085449	936.132	WDFY1	WD repeat and FYVE domain containing 1 [Source:HGNC Symbol;Acc:HGNC:20451]	0.00829981	0.0558375	0.148642	0.881836	0.939705	-0.101774	0.0562864	-1.80814	0.0705839	0.154568
ENSG00000085465	78.2656	OVGP1	oviductal glycoprotein 1 [Source:HGNC Symbol;Acc:HGNC:8524]	0.0194877	0.165519	0.117737	0.906276	0.954876	-0.173019	0.168205	-1.02862	0.303657	0.473708
ENSG00000085491	311.695	SLC25A24	solute carrier family 25 member 24 [Source:HGNC Symbol;Acc:HGNC:20662]	-0.0110578	0.0933684	-0.118432	0.905725	0.954629	0.13448	0.0925289	1.45339	0.146117	0.27718
ENSG00000085511	578.938	MAP3K4	mitogen-activated protein kinase kinase kinase 4 [Source:HGNC Symbol;Acc:HGNC:6856]	0.235839	0.0570537	4.13364	3.57062e-05	0.000332887	0.125292	0.0576913	2.17176	0.0298735	0.0750872
ENSG00000085514	3.88653	PILRA	paired immunoglobin like type 2 receptor alpha [Source:HGNC Symbol;Acc:HGNC:20396]	-0.334789	0.78013	-0.429145	0.667818	NA	0.715367	0.721984	0.990834	0.321766	0.493575
ENSG00000085552	363.8	IGSF9	immunoglobulin superfamily member 9 [Source:HGNC Symbol;Acc:HGNC:18132]	0.114138	0.0823808	1.38549	0.165903	0.329915	-0.322801	0.0853029	-3.78417	0.000154222	0.000632123
ENSG00000085563	0.0303427	ABCB1	ATP binding cassette subfamily B member 1 [Source:HGNC Symbol;Acc:HGNC:40]	0.946195	5.94781	0.159083	0.873603	NA	0	5.94781	0	1	NA
ENSG00000085644	492.214	ZNF213	zinc finger protein 213 [Source:HGNC Symbol;Acc:HGNC:13005]	-0.0625222	0.0637426	-0.980854	0.326665	0.521617	-0.434284	0.0663438	-6.54596	5.91138e-11	4.95061e-10
ENSG00000085662	7.78422	AKR1B1	aldo-keto reductase family 1 member B [Source:HGNC Symbol;Acc:HGNC:381]	0.401094	0.513095	0.781716	0.434382	NA	-0.044345	0.536697	-0.0826258	0.934149	0.963828
ENSG00000085719	9694.9	CPNE3	copine 3 [Source:HGNC Symbol;Acc:HGNC:2316]	0.0245135	0.0293305	0.835767	0.403286	0.597355	0.423751	0.0290773	14.5733	4.15599e-48	2.60471e-46
ENSG00000085721	2131.83	RRN3	RRN3 homolog, RNA polymerase I transcription factor [Source:HGNC Symbol;Acc:HGNC:30346]	0.0449985	0.0328694	1.36901	0.170997	0.336724	-0.401751	0.0341272	-11.7721	5.43295e-32	1.64162e-30
ENSG00000085733	4848.73	CTTN	cortactin [Source:HGNC Symbol;Acc:HGNC:3338]	0.0117007	0.0303972	0.384928	0.70029	0.8298	-0.138937	0.0306092	-4.53907	5.6503e-06	2.83333e-05
ENSG00000085741	0.0607592	WNT11	Wnt family member 11 [Source:HGNC Symbol;Acc:HGNC:12776]	0	5.94781	0	1	NA	0.962587	5.94781	0.161839	0.871433	NA
ENSG00000085760	885.722	MTIF2	mitochondrial translational initiation factor 2 [Source:HGNC Symbol;Acc:HGNC:7441]	0.157301	0.0524544	2.99881	0.00271039	0.0136078	-0.186079	0.0538824	-3.45342	0.000553524	0.00206957
ENSG00000085788	1051.14	DDHD2	DDHD domain containing 2 [Source:HGNC Symbol;Acc:HGNC:29106]	-0.15061	0.0476313	-3.162	0.0015669	0.00863043	-0.327823	0.0483986	-6.77341	1.25782e-11	1.12189e-10
ENSG00000085831	603.125	TTC39A	tetratricopeptide repeat domain 39A [Source:HGNC Symbol;Acc:HGNC:18657]	-0.124604	0.0588839	-2.1161	0.0343366	0.103292	-0.32455	0.0602642	-5.38546	7.22597e-08	4.57356e-07
ENSG00000085832	2142.48	EPS15	epidermal growth factor receptor pathway substrate 15 [Source:HGNC Symbol;Acc:HGNC:3419]	-0.17576	0.0463058	-3.79565	0.000147259	0.00115526	-0.0951813	0.0461811	-2.06104	0.039299	0.0949043
ENSG00000085840	557.104	ORC1	origin recognition complex subunit 1 [Source:HGNC Symbol;Acc:HGNC:8487]	0.362293	0.0702443	5.15761	2.50117e-07	3.87813e-06	0.215284	0.0708963	3.0366	0.00239259	0.00798889
ENSG00000085871	1392.18	MGST2	microsomal glutathione S-transferase 2 [Source:HGNC Symbol;Acc:HGNC:7063]	-0.0865718	0.0456815	-1.89512	0.0580768	0.153828	-0.232512	0.0461817	-5.03473	4.78531e-07	2.75247e-06
ENSG00000085872	1421.86	CHERP	calcium homeostasis endoplasmic reticulum protein [Source:HGNC Symbol;Acc:HGNC:16930]	0.374503	0.0465568	8.044	8.69513e-16	5.10994e-14	0.419345	0.0464863	9.02084	1.86647e-19	2.97523e-18
ENSG00000085978	707.445	ATG16L1	autophagy related 16 like 1 [Source:HGNC Symbol;Acc:HGNC:21498]	-0.0126599	0.0560975	-0.225676	0.821453	0.906042	-0.0810165	0.0565063	-1.43376	0.151641	0.285023
ENSG00000085982	1940.21	USP40	ubiquitin specific peptidase 40 [Source:HGNC Symbol;Acc:HGNC:20069]	-0.105724	0.0338055	-3.12742	0.00176347	0.00957689	0.135339	0.0331672	4.0805	4.49397e-05	0.000199742
ENSG00000085998	3472.32	POMGNT1	protein O-linked mannose N-acetylglucosaminyltransferase 1 (beta 1,2-) [Source:HGNC Symbol;Acc:HGNC:19139]	-0.00461927	0.0339003	-0.13626	0.891615	0.946289	0.0592946	0.0338224	1.75312	0.0795814	0.17081
ENSG00000085999	400.193	RAD54L	RAD54 like [Source:HGNC Symbol;Acc:HGNC:9826]	0.120195	0.0742428	1.61894	0.105459	0.239109	0.178825	0.0740137	2.4161	0.0156876	0.0427422
ENSG00000086015	754.353	MAST2	microtubule associated serine/threonine kinase 2 [Source:HGNC Symbol;Acc:HGNC:19035]	0.0575223	0.0516931	1.11277	0.265809	0.454665	0.247834	0.0509205	4.86708	1.13257e-06	6.20034e-06
ENSG00000086061	6883.58	DNAJA1	DnaJ heat shock protein family (Hsp40) member A1 [Source:HGNC Symbol;Acc:HGNC:5229]	-0.0509109	0.0271817	-1.87298	0.0610709	0.159322	0.226508	0.0269314	8.41054	4.0813e-17	5.55328e-16
ENSG00000086062	3231.54	B4GALT1	beta-1,4-galactosyltransferase 1 [Source:HGNC Symbol;Acc:HGNC:924]	-0.0678299	0.0347331	-1.95289	0.0508329	0.139788	-0.293123	0.035124	-8.34538	7.09876e-17	9.51955e-16
ENSG00000086065	1427.27	CHMP5	charged multivesicular body protein 5 [Source:HGNC Symbol;Acc:HGNC:26942]	-0.0837988	0.0421023	-1.99036	0.0465513	0.130736	0.196075	0.041287	4.74908	2.04349e-06	1.08226e-05
ENSG00000086102	1544.51	NFX1	nuclear transcription factor, X-box binding 1 [Source:HGNC Symbol;Acc:HGNC:7803]	-0.208405	0.0367339	-5.67337	1.40013e-08	2.80111e-07	-0.252546	0.0369486	-6.83505	8.19789e-12	7.43442e-11
ENSG00000086159	0.963867	AQP6	aquaporin 6 [Source:HGNC Symbol;Acc:HGNC:639]	-0.128671	1.30947	-0.0982623	0.921724	NA	-1.07776	1.4893	-0.723669	0.469269	NA
ENSG00000086189	747.388	DIMT1	DIMT1 rRNA methyltransferase and ribosome maturation factor [Source:HGNC Symbol;Acc:HGNC:30217]	0.0847319	0.0574588	1.47465	0.140306	0.294059	0.165075	0.0571683	2.88754	0.00388271	0.0123952
ENSG00000086200	1079.68	IPO11	importin 11 [Source:HGNC Symbol;Acc:HGNC:20628]	0.00947031	0.0457659	0.20693	0.836065	0.91313	0.145282	0.0453377	3.20444	0.00135327	0.00472514
ENSG00000086205	24224.6	FOLH1	folate hydrolase 1 [Source:HGNC Symbol;Acc:HGNC:3788]	-0.166731	0.0249325	-6.68731	2.27307e-11	7.51826e-10	-0.08336	0.0249084	-3.34667	0.000817898	0.00297125
ENSG00000086232	4471.08	EIF2AK1	eukaryotic translation initiation factor 2 alpha kinase 1 [Source:HGNC Symbol;Acc:HGNC:24921]	-0.102202	0.032919	-3.10464	0.00190508	0.010178	-0.0127083	0.0328204	-0.387208	0.698602	0.816114
ENSG00000086288	0.036491	NME8	NME/NM23 family member 8 [Source:HGNC Symbol;Acc:HGNC:16473]	0	5.94781	0	1	NA	0	5.94781	0	1	NA
ENSG00000086289	91.3404	EPDR1	ependymin related 1 [Source:HGNC Symbol;Acc:HGNC:17572]	0.0285533	0.131265	0.217523	0.827801	0.909234	-0.353089	0.137454	-2.56878	0.0102058	0.0293314
ENSG00000086300	161.532	SNX10	sorting nexin 10 [Source:HGNC Symbol;Acc:HGNC:14974]	-0.245635	0.113217	-2.1696	0.0300368	0.0935425	-0.414563	0.115228	-3.59777	0.000320957	0.00124865
ENSG00000086475	2432.86	SEPHS1	selenophosphate synthetase 1 [Source:HGNC Symbol;Acc:HGNC:19685]	-0.0444181	0.0292687	-1.5176	0.129115	0.277087	0.139485	0.02884	4.83652	1.32129e-06	7.15932e-06
ENSG00000086504	1503.44	MRPL28	mitochondrial ribosomal protein L28 [Source:HGNC Symbol;Acc:HGNC:14484]	0.0110694	0.0520566	0.212641	0.831607	0.910938	0.341733	0.0513223	6.65857	2.76502e-11	2.38855e-10
ENSG00000086506	8.82733	HBQ1	hemoglobin subunit theta 1 [Source:HGNC Symbol;Acc:HGNC:4833]	0.565527	0.464435	1.21767	0.22335	NA	0.549608	0.465822	1.17987	0.238052	0.397744
ENSG00000086544	370.816	ITPKC	inositol-trisphosphate 3-kinase C [Source:HGNC Symbol;Acc:HGNC:14897]	-0.0943931	0.0666833	-1.41554	0.156909	0.318071	-0.472519	0.0697474	-6.77472	1.24651e-11	1.11322e-10
ENSG00000086548	0.603159	CEACAM6	CEA cell adhesion molecule 6 [Source:HGNC Symbol;Acc:HGNC:1818]	0.224928	1.99943	0.112496	0.91043	NA	1.54506	1.91104	0.808491	0.418808	NA
ENSG00000086570	10.7534	FAT2	FAT atypical cadherin 2 [Source:HGNC Symbol;Acc:HGNC:3596]	0.0815898	0.425125	0.19192	0.847805	NA	0.585187	0.405794	1.44208	0.14928	0.281864
ENSG00000086589	999.173	RBM22	RNA binding motif protein 22 [Source:HGNC Symbol;Acc:HGNC:25503]	0.457217	0.0462382	9.8883	4.67928e-23	5.17631e-21	0.629847	0.0457246	13.7748	3.61419e-43	1.83498e-41
ENSG00000086598	7734.34	TMED2	transmembrane p24 trafficking protein 2 [Source:HGNC Symbol;Acc:HGNC:16996]	-0.121327	0.0313565	-3.86927	0.000109162	0.00088919	0.0908163	0.0312066	2.91016	0.00361246	0.0116044
ENSG00000086619	99.0843	ERO1B	endoplasmic reticulum oxidoreductase 1 beta [Source:HGNC Symbol;Acc:HGNC:14355]	-0.0581896	0.134627	-0.432228	0.665575	0.807004	-0.115573	0.135685	-0.851772	0.39434	0.566693
ENSG00000086666	1485.32	ZFAND6	zinc finger AN1-type containing 6 [Source:HGNC Symbol;Acc:HGNC:30164]	-0.0412777	0.0442777	-0.932245	0.35121	0.546041	0.103736	0.0439136	2.36228	0.018163	0.0485351
ENSG00000086696	1.34538	HSD17B2	hydroxysteroid 17-beta dehydrogenase 2 [Source:HGNC Symbol;Acc:HGNC:5211]	-1.77372	1.48432	-1.19497	0.232097	NA	-0.430524	1.26582	-0.340116	0.733769	0.841548
ENSG00000086712	622.065	TXLNG	taxilin gamma [Source:HGNC Symbol;Acc:HGNC:18578]	0.11851	0.0568865	2.08328	0.037226	0.109747	0.1833	0.0566494	3.23569	0.00121348	0.00427379
ENSG00000086717	7.65256	PPEF1	protein phosphatase with EF-hand domain 1 [Source:HGNC Symbol;Acc:HGNC:9243]	-0.118011	0.538473	-0.219158	0.826527	NA	-0.583552	0.564049	-1.03458	0.300867	0.470432
ENSG00000086730	45.7582	LAT2	linker for activation of T cells family member 2 [Source:HGNC Symbol;Acc:HGNC:12749]	0.187043	0.195749	0.955523	0.339313	0.53436	0.60737	0.189452	3.20593	0.00134626	0.00470455
ENSG00000086758	8482.86	HUWE1	HECT, UBA and WWE domain containing E3 ubiquitin protein ligase 1 [Source:HGNC Symbol;Acc:HGNC:30892]	-0.0569419	0.0754105	-0.755092	0.450194	0.640133	0.158734	0.0753548	2.10648	0.0351625	0.0862362
ENSG00000086827	869.518	ZW10	zw10 kinetochore protein [Source:HGNC Symbol;Acc:HGNC:13194]	0.170574	0.0533644	3.1964	0.00139156	0.00782172	0.506852	0.0522669	9.69738	3.09347e-22	5.76166e-21
ENSG00000086848	217.506	ALG9	ALG9 alpha-1,2-mannosyltransferase [Source:HGNC Symbol;Acc:HGNC:15672]	-0.0390616	0.0966596	-0.404115	0.686128	0.819967	-0.0357876	0.0967753	-0.369801	0.711531	0.824867
ENSG00000086967	1.30712	MYBPC2	myosin binding protein C, fast type [Source:HGNC Symbol;Acc:HGNC:7550]	2.92452	1.41196	2.07126	0.0383347	NA	1.96648	1.49947	1.31145	0.189706	0.337983
ENSG00000086991	0.032818	NOX4	NADPH oxidase 4 [Source:HGNC Symbol;Acc:HGNC:7891]	0	5.94781	0	1	NA	0.9626	5.94781	0.161841	0.871431	NA
ENSG00000087008	375.69	ACOX3	acyl-CoA oxidase 3, pristanoyl [Source:HGNC Symbol;Acc:HGNC:121]	0.0378088	0.0737843	0.512423	0.608355	0.766059	0.0473258	0.0738283	0.641026	0.521506	0.680913
ENSG00000087053	1382.95	MTMR2	myotubularin related protein 2 [Source:HGNC Symbol;Acc:HGNC:7450]	0.0296946	0.0457426	0.649166	0.516231	0.69642	0.233526	0.0452373	5.16225	2.44e-07	1.45334e-06
ENSG00000087074	120.23	PPP1R15A	protein phosphatase 1 regulatory subunit 15A [Source:HGNC Symbol;Acc:HGNC:14375]	-0.27127	0.127788	-2.12282	0.0337693	0.101948	0.129301	0.122564	1.05497	0.291439	0.460154
ENSG00000087076	19.4745	HSD17B14	hydroxysteroid 17-beta dehydrogenase 14 [Source:HGNC Symbol;Acc:HGNC:23238]	-0.0498708	0.344119	-0.144923	0.884772	NA	0.0245983	0.341872	0.0719516	0.94264	0.969021
ENSG00000087077	70.6122	TRIP6	thyroid hormone receptor interactor 6 [Source:HGNC Symbol;Acc:HGNC:12311]	0.217678	0.159554	1.36429	0.172476	0.338574	-0.30968	0.168648	-1.83625	0.06632	0.146782
ENSG00000087085	18.3857	ACHE	acetylcholinesterase (Cartwright blood group) [Source:HGNC Symbol;Acc:HGNC:108]	0.324469	0.362366	0.895419	0.370563	NA	0.132739	0.368158	0.360548	0.718437	0.830139
ENSG00000087086	4980.76	FTL	ferritin light chain [Source:HGNC Symbol;Acc:HGNC:3999]	-0.134163	0.0392247	-3.42037	0.000625356	0.00405127	-0.0311413	0.0391314	-0.795812	0.426141	0.597373
ENSG00000087087	3305.24	SRRT	serrate, RNA effector molecule [Source:HGNC Symbol;Acc:HGNC:24101]	0.0829329	0.0311329	2.66383	0.00772555	0.0320844	0.172074	0.031009	5.54918	2.87016e-08	1.8838e-07
ENSG00000087088	775.532	BAX	BCL2 associated X, apoptosis regulator [Source:HGNC Symbol;Acc:HGNC:959]	0.0324488	0.0655464	0.495051	0.620564	0.773956	0.686741	0.0633941	10.8329	2.4046e-27	5.71933e-26
ENSG00000087095	372.272	NLK	nemo like kinase [Source:HGNC Symbol;Acc:HGNC:29858]	-0.209754	0.0736562	-2.84774	0.00440309	0.0203234	-0.313467	0.0745573	-4.20437	2.61806e-05	0.000120418
ENSG00000087111	2139.77	PIGS	phosphatidylinositol glycan anchor biosynthesis class S [Source:HGNC Symbol;Acc:HGNC:14937]	0.0218989	0.0376876	0.581064	0.561198	0.731952	0.120085	0.0374999	3.20227	0.00136351	0.00475775
ENSG00000087116	0.912009	ADAMTS2	ADAM metallopeptidase with thrombospondin type 1 motif 2 [Source:HGNC Symbol;Acc:HGNC:218]	1.24779	1.6241	0.768298	0.44231	NA	1.8373	1.5713	1.16928	0.24229	NA
ENSG00000087128	61.0587	TMPRSS11E	transmembrane serine protease 11E [Source:HGNC Symbol;Acc:HGNC:24465]	-0.0727829	0.182564	-0.398671	0.690136	0.822167	0.240718	0.17825	1.35045	0.176871	0.321129
ENSG00000087152	719.92	ATXN7L3	ataxin 7 like 3 [Source:HGNC Symbol;Acc:HGNC:25416]	0.0376345	0.0556343	0.676462	0.498748	0.682313	0.125695	0.0553044	2.27278	0.0230394	0.0598531
ENSG00000087157	301.003	PGS1	phosphatidylglycerophosphate synthase 1 [Source:HGNC Symbol;Acc:HGNC:30029]	0.00607755	0.0871001	0.0697766	0.944371	0.973737	0.195729	0.0858702	2.27935	0.0226461	0.058905
ENSG00000087191	2418.61	PSMC5	proteasome 26S subunit, ATPase 5 [Source:HGNC Symbol;Acc:HGNC:9552]	-0.0266667	0.0337253	-0.790703	0.429117	0.62069	0.172167	0.033312	5.16833	2.36194e-07	1.41002e-06
ENSG00000087206	591.398	UIMC1	ubiquitin interaction motif containing 1 [Source:HGNC Symbol;Acc:HGNC:30298]	-0.026084	0.0618372	-0.421817	0.673159	0.812006	0.274677	0.0603517	4.55128	5.33204e-06	2.68077e-05
ENSG00000087237	0	CETP	cholesteryl ester transfer protein [Source:HGNC Symbol;Acc:HGNC:1869]	NA	NA	NA	NA	NA	NA	NA	NA	NA	NA
ENSG00000087245	0.172334	MMP2	matrix metallopeptidase 2 [Source:HGNC Symbol;Acc:HGNC:7166]	-1.76993	4.91406	-0.360176	0.718715	NA	-1.03218	4.91406	-0.210047	0.833631	NA
ENSG00000087250	0.862009	MT3	metallothionein 3 [Source:HGNC Symbol;Acc:HGNC:7408]	0.258176	1.81951	0.141893	0.887165	NA	2.06632	1.6118	1.28199	0.199845	NA
ENSG00000087253	17.269	LPCAT2	lysophosphatidylcholine acyltransferase 2 [Source:HGNC Symbol;Acc:HGNC:26032]	0.199552	0.329304	0.60598	0.544528	NA	0.236504	0.328661	0.7196	0.471771	0.638474
ENSG00000087258	10.0603	GNAO1	G protein subunit alpha o1 [Source:HGNC Symbol;Acc:HGNC:4389]	0.0143794	0.436295	0.0329579	0.973708	NA	0.514703	0.415133	1.23985	0.215031	0.370205
ENSG00000087263	886.013	OGFOD1	2-oxoglutarate and iron dependent oxygenase domain containing 1 [Source:HGNC Symbol;Acc:HGNC:25585]	-0.128374	0.0477612	-2.68783	0.00719183	0.0303051	-0.187262	0.0481025	-3.89298	9.90203e-05	0.00041753
ENSG00000087266	1125.6	SH3BP2	SH3 domain binding protein 2 [Source:HGNC Symbol;Acc:HGNC:10825]	-0.154015	0.0452931	-3.4004	0.000672884	0.00430829	-0.372628	0.046264	-8.05439	7.98767e-16	9.93549e-15
ENSG00000087269	1670.72	NOP14	NOP14 nucleolar protein [Source:HGNC Symbol;Acc:HGNC:16821]	0.154974	0.0346735	4.46953	7.83922e-06	8.68649e-05	0.271071	0.0343875	7.88282	3.20063e-15	3.81492e-14
ENSG00000087274	4127.74	ADD1	adducin 1 [Source:HGNC Symbol;Acc:HGNC:243]	0.0347537	0.0281394	1.23506	0.21681	0.397283	0.157523	0.0279654	5.63277	1.77335e-08	1.18679e-07
ENSG00000087299	923.452	L2HGDH	L-2-hydroxyglutarate dehydrogenase [Source:HGNC Symbol;Acc:HGNC:20499]	0.035177	0.0499549	0.704176	0.481323	0.667358	0.336302	0.0488522	6.88408	5.81614e-12	5.35963e-11
ENSG00000087301	541.184	TXNDC16	thioredoxin domain containing 16 [Source:HGNC Symbol;Acc:HGNC:19965]	-0.040124	0.0593186	-0.676416	0.498777	0.682313	0.0538766	0.0588949	0.914793	0.3603	0.533382
ENSG00000087302	2209.95	RTRAF	RNA transcription, translation and transport factor [Source:HGNC Symbol;Acc:HGNC:23169]	-0.0501943	0.0354266	-1.41685	0.156526	0.317538	0.161173	0.0349794	4.60766	4.07233e-06	2.08564e-05
ENSG00000087303	2.0515	NID2	nidogen 2 [Source:HGNC Symbol;Acc:HGNC:13389]	1.03014	0.883715	1.16569	0.243738	NA	0.828168	0.897395	0.922858	0.356081	0.529177
ENSG00000087338	673.607	GMCL1	germ cell-less 1, spermatogenesis associated [Source:HGNC Symbol;Acc:HGNC:23843]	0.00725003	0.0529544	0.136911	0.891101	0.946004	0.389445	0.0511196	7.6183	2.57038e-14	2.8694e-13
ENSG00000087365	7592.03	SF3B2	splicing factor 3b subunit 2 [Source:HGNC Symbol;Acc:HGNC:10769]	0.13719	0.0226544	6.05578	1.39742e-09	3.49063e-08	0.672308	0.0221561	30.3441	3.00775e-202	7.05853e-199
ENSG00000087448	1437.37	KLHL42	kelch like family member 42 [Source:HGNC Symbol;Acc:HGNC:29252]	0.0634459	0.042287	1.50036	0.13352	0.283906	-0.308065	0.0434882	-7.08388	1.40175e-12	1.35996e-11
ENSG00000087460	15938.5	GNAS	GNAS complex locus [Source:HGNC Symbol;Acc:HGNC:4392]	-0.0664801	0.0259275	-2.56408	0.0103451	0.0404765	-0.0695479	0.0259362	-2.6815	0.00732929	0.0219018
ENSG00000087470	2280.02	DNM1L	dynamin 1 like [Source:HGNC Symbol;Acc:HGNC:2973]	-0.0158541	0.0310516	-0.510574	0.609649	0.766956	0.220524	0.0305592	7.21628	5.34281e-13	5.3532e-12
ENSG00000087494	2.57318	PTHLH	parathyroid hormone like hormone [Source:HGNC Symbol;Acc:HGNC:9607]	-0.884636	0.862369	-1.02582	0.304976	NA	-2.26663	1.08359	-2.09178	0.0364581	0.0889491
ENSG00000087495	0.21445	PHACTR3	phosphatase and actin regulator 3 [Source:HGNC Symbol;Acc:HGNC:15833]	0.946226	3.73079	0.253626	0.799784	NA	1.68661	3.73005	0.452168	0.651148	NA
ENSG00000087502	1263.13	ERGIC2	ERGIC and golgi 2 [Source:HGNC Symbol;Acc:HGNC:30208]	0.0421467	0.0418634	1.00677	0.314046	0.507968	-0.0533049	0.0422378	-1.26202	0.206942	0.359768
ENSG00000087510	616.263	TFAP2C	transcription factor AP-2 gamma [Source:HGNC Symbol;Acc:HGNC:11744]	0.188816	0.0556525	3.39276	0.000691919	0.00440446	-0.214194	0.0578744	-3.70102	0.000214738	0.000857531
ENSG00000087586	1321.2	AURKA	aurora kinase A [Source:HGNC Symbol;Acc:HGNC:11393]	0.270861	0.0434527	6.23347	4.56223e-10	1.246e-08	0.6583	0.0424938	15.4917	3.94882e-54	3.17122e-52
ENSG00000087589	1.17837	CASS4	Cas scaffold protein family member 4 [Source:HGNC Symbol;Acc:HGNC:15878]	1.25391	1.57656	0.795344	0.426413	NA	2.04465	1.50813	1.35575	0.175177	NA
ENSG00000087842	1037.91	PIR	pirin [Source:HGNC Symbol;Acc:HGNC:30048]	-0.118194	0.0462814	-2.55381	0.0106552	0.0415353	-0.214895	0.0467507	-4.59662	4.29395e-06	2.19435e-05
ENSG00000087884	35.141	AAMDC	adipogenesis associated Mth938 domain containing [Source:HGNC Symbol;Acc:HGNC:30205]	-0.289433	0.242928	-1.19144	0.233483	0.417699	-0.0879642	0.238268	-0.369182	0.711992	0.825266
ENSG00000087903	147.667	RFX2	regulatory factor X2 [Source:HGNC Symbol;Acc:HGNC:9983]	-0.00598047	0.114526	-0.0522194	0.958354	0.980551	-0.240372	0.117287	-2.04944	0.0404194	0.0970884
ENSG00000087995	659.623	METTL2A	methyltransferase like 2A [Source:HGNC Symbol;Acc:HGNC:25755]	0.0790659	0.0532202	1.48564	0.137375	0.289271	0.485177	0.0512925	9.45902	3.10857e-21	5.4577e-20
ENSG00000088002	174.169	SULT2B1	sulfotransferase family 2B member 1 [Source:HGNC Symbol;Acc:HGNC:11459]	0.135205	0.10602	1.27529	0.202208	0.377891	0.00429591	0.107557	0.0399409	0.96814	0.981901
ENSG00000088035	440.907	ALG6	ALG6 alpha-1,3-glucosyltransferase [Source:HGNC Symbol;Acc:HGNC:23157]	-0.113596	0.0696466	-1.63103	0.102884	0.235011	-0.27444	0.0707273	-3.88026	0.000104346	0.000438583
ENSG00000088038	1022.01	CNOT3	CCR4-NOT transcription complex subunit 3 [Source:HGNC Symbol;Acc:HGNC:7879]	0.0171984	0.0445247	0.386267	0.699299	0.829338	0.300072	0.043486	6.90042	5.18476e-12	4.79035e-11
ENSG00000088053	2.28068	GP6	glycoprotein VI platelet [Source:HGNC Symbol;Acc:HGNC:14388]	-1.06813	0.962487	-1.10976	0.267101	NA	-0.852092	0.944431	-0.902227	0.366936	0.540111
ENSG00000088179	378.701	PTPN4	protein tyrosine phosphatase non-receptor type 4 [Source:HGNC Symbol;Acc:HGNC:9656]	-0.119945	0.0727603	-1.6485	0.0992509	0.228896	-0.118032	0.072863	-1.61991	0.105251	0.21392
ENSG00000088205	2307.63	DDX18	DEAD-box helicase 18 [Source:HGNC Symbol;Acc:HGNC:2741]	-0.0336345	0.0359618	-0.935284	0.349642	0.544825	0.0213801	0.0358744	0.595972	0.551194	0.706633
ENSG00000088247	6282.38	KHSRP	KH-type splicing regulatory protein [Source:HGNC Symbol;Acc:HGNC:6316]	-0.0187918	0.0315635	-0.595364	0.5516	0.724822	0.0442587	0.0315195	1.40417	0.160268	0.297637
ENSG00000088256	1888.5	GNA11	G protein subunit alpha 11 [Source:HGNC Symbol;Acc:HGNC:4379]	0.0621731	0.0428345	1.45147	0.146648	0.303773	-0.026572	0.0430776	-0.61684	0.53734	0.69431
ENSG00000088280	284.983	ASAP3	ArfGAP with SH3 domain, ankyrin repeat and PH domain 3 [Source:HGNC Symbol;Acc:HGNC:14987]	-0.357818	0.091226	-3.92233	8.76966e-05	0.000731119	-0.801978	0.0958128	-8.37025	5.74955e-17	7.75455e-16
ENSG00000088298	302.354	EDEM2	ER degradation enhancing alpha-mannosidase like protein 2 [Source:HGNC Symbol;Acc:HGNC:15877]	-0.260868	0.0849847	-3.06958	0.00214358	0.0112378	-0.272434	0.0852002	-3.19758	0.00138588	0.00483182
ENSG00000088305	184.9	DNMT3B	DNA methyltransferase 3 beta [Source:HGNC Symbol;Acc:HGNC:2979]	-0.269951	0.102708	-2.62834	0.00858022	0.0349582	-0.624113	0.106586	-5.85548	4.75624e-09	3.3781e-08
ENSG00000088320	0.128661	REM1	RRAD and GEM like GTPase 1 [Source:HGNC Symbol;Acc:HGNC:15922]	0	5.94781	0	1	NA	0.962561	5.94781	0.161835	0.871436	NA
ENSG00000088325	3802.28	TPX2	TPX2 microtubule nucleation factor [Source:HGNC Symbol;Acc:HGNC:1249]	0.339634	0.0410116	8.28142	1.21717e-16	7.97156e-15	1.13014	0.040303	28.0412	5.11245e-173	5.99889e-170
ENSG00000088340	64.1955	FER1L4	fer-1 like family member 4 (pseudogene) [Source:HGNC Symbol;Acc:HGNC:15801]	0.0319168	0.171118	0.18652	0.852037	0.921932	-0.321611	0.177964	-1.80717	0.0707351	0.154818
ENSG00000088356	1039.45	PDRG1	p53 and DNA damage regulated 1 [Source:HGNC Symbol;Acc:HGNC:16119]	0.1459	0.0441224	3.30672	0.000943947	0.00569222	-0.339901	0.0461086	-7.37175	1.68404e-13	1.76431e-12
ENSG00000088367	1173.51	EPB41L1	erythrocyte membrane protein band 4.1 like 1 [Source:HGNC Symbol;Acc:HGNC:3378]	0.0458342	0.0425814	1.07639	0.281753	0.471702	-0.117793	0.0432846	-2.72136	0.0065013	0.0196866
ENSG00000088386	0.173607	SLC15A1	solute carrier family 15 member 1 [Source:HGNC Symbol;Acc:HGNC:10920]	-1.18682	4.94008	-0.240244	0.810141	NA	-1.17042	4.94008	-0.236923	0.812716	NA
ENSG00000088387	669.584	DOCK9	dedicator of cytokinesis 9 [Source:HGNC Symbol;Acc:HGNC:14132]	-0.0244293	0.0558293	-0.437571	0.661697	0.804376	-0.132749	0.0564814	-2.35031	0.018758	0.0498977
ENSG00000088448	320.201	ANKRD10	ankyrin repeat domain 10 [Source:HGNC Symbol;Acc:HGNC:20265]	-0.085538	0.079279	-1.07895	0.28061	0.470507	0.326291	0.0763465	4.27382	1.92153e-05	8.99083e-05
ENSG00000088451	196.095	TGDS	TDP-glucose 4,6-dehydratase [Source:HGNC Symbol;Acc:HGNC:20324]	-0.015443	0.10139	-0.152313	0.87894	0.937461	-0.169291	0.102891	-1.64534	0.0999003	0.204708
ENSG00000088538	214.52	DOCK3	dedicator of cytokinesis 3 [Source:HGNC Symbol;Acc:HGNC:2989]	-0.144268	0.094738	-1.52281	0.127807	0.275149	-0.231262	0.0957665	-2.41485	0.0157416	0.0428729
ENSG00000088543	196.946	C3orf18	chromosome 3 open reading frame 18 [Source:HGNC Symbol;Acc:HGNC:24837]	-0.326149	0.10462	-3.11746	0.00182416	0.00982943	-0.733522	0.1099	-6.67446	2.48151e-11	2.1551e-10
ENSG00000088682	1672.69	COQ9	coenzyme Q9 [Source:HGNC Symbol;Acc:HGNC:25302]	0.0660319	0.0406025	1.6263	0.103885	0.236517	0.428218	0.039724	10.7798	4.28641e-27	1.00592e-25
ENSG00000088726	30.4677	TMEM40	transmembrane protein 40 [Source:HGNC Symbol;Acc:HGNC:25620]	-0.459034	0.257558	-1.78226	0.0747076	0.186295	-0.171076	0.250123	-0.683966	0.493997	0.657863
ENSG00000088727	171.706	KIF9	kinesin family member 9 [Source:HGNC Symbol;Acc:HGNC:16666]	-0.0298229	0.109862	-0.271457	0.786039	0.885076	-0.259223	0.112328	-2.30773	0.0210141	0.0551488
ENSG00000088756	202.025	ARHGAP28	Rho GTPase activating protein 28 [Source:HGNC Symbol;Acc:HGNC:25509]	0.198376	0.117785	1.68421	0.092141	0.216558	0.658618	0.114202	5.76711	8.06404e-09	5.58978e-08
ENSG00000088766	221.861	CRLS1	cardiolipin synthase 1 [Source:HGNC Symbol;Acc:HGNC:16148]	0.0139463	0.106955	0.130393	0.896255	0.949012	0.504326	0.103621	4.86701	1.13298e-06	6.201e-06
ENSG00000088782	0	DEFB127	defensin beta 127 [Source:HGNC Symbol;Acc:HGNC:16206]	NA	NA	NA	NA	NA	NA	NA	NA	NA	NA
ENSG00000088808	726.313	PPP1R13B	protein phosphatase 1 regulatory subunit 13B [Source:HGNC Symbol;Acc:HGNC:14950]	0.200673	0.0582603	3.44442	0.000572284	0.00375551	0.155261	0.0585177	2.65324	0.00797243	0.0235934
ENSG00000088812	1700.89	ATRN	attractin [Source:HGNC Symbol;Acc:HGNC:885]	-0.0238232	0.0383429	-0.62132	0.534389	0.710647	-0.284407	0.0391982	-7.25562	3.99816e-13	4.05207e-12
ENSG00000088826	129.07	SMOX	spermine oxidase [Source:HGNC Symbol;Acc:HGNC:15862]	-0.393499	0.118147	-3.33058	0.000866666	0.00529902	-1.04214	0.128917	-8.0838	6.27793e-16	7.85988e-15
ENSG00000088827	0.491332	SIGLEC1	sialic acid binding Ig like lectin 1 [Source:HGNC Symbol;Acc:HGNC:11127]	0.94244	2.08307	0.452429	0.65096	NA	-0.480009	2.08872	-0.229811	0.818239	NA
ENSG00000088832	2947.39	FKBP1A	FKBP prolyl isomerase 1A [Source:HGNC Symbol;Acc:HGNC:3711]	-0.092553	0.0280714	-3.29705	0.000977045	0.00586494	0.0318435	0.0278234	1.14449	0.252422	0.414767
ENSG00000088833	1844.69	NSFL1C	NSFL1 cofactor [Source:HGNC Symbol;Acc:HGNC:15912]	0.0534414	0.0362533	1.47411	0.140451	0.294316	0.29105	0.0356598	8.16187	3.29876e-16	4.19718e-15
ENSG00000088836	85.9205	SLC4A11	solute carrier family 4 member 11 [Source:HGNC Symbol;Acc:HGNC:16438]	-0.000383736	0.140508	-0.00273107	0.997821	0.998655	-0.685854	0.15399	-4.45389	8.43272e-06	4.13243e-05
ENSG00000088854	76.5046	C20orf194	chromosome 20 open reading frame 194 [Source:HGNC Symbol;Acc:HGNC:17721]	-0.147358	0.170535	-0.864091	0.387538	0.583167	-0.359081	0.174968	-2.05227	0.0401435	0.0965355
ENSG00000088876	206.1	ZNF343	zinc finger protein 343 [Source:HGNC Symbol;Acc:HGNC:16017]	-0.078969	0.090107	-0.876391	0.380817	0.576614	-0.215982	0.0916992	-2.35533	0.0185064	0.049357
ENSG00000088881	11.6671	EBF4	EBF family member 4 [Source:HGNC Symbol;Acc:HGNC:29278]	0.100964	0.410692	0.24584	0.805806	NA	0.577983	0.39527	1.46225	0.143674	0.273504
ENSG00000088882	0	CPXM1	carboxypeptidase X, M14 family member 1 [Source:HGNC Symbol;Acc:HGNC:15771]	NA	NA	NA	NA	NA	NA	NA	NA	NA	NA
ENSG00000088888	4017.9	MAVS	mitochondrial antiviral signaling protein [Source:HGNC Symbol;Acc:HGNC:29233]	0.0705956	0.0363357	1.94287	0.0520314	0.141946	-0.0777448	0.0365513	-2.127	0.0334197	0.0826143
ENSG00000088899	160.758	LZTS3	leucine zipper tumor suppressor family member 3 [Source:HGNC Symbol;Acc:HGNC:30139]	0.150997	0.11464	1.31714	0.187793	0.359004	-0.367066	0.121366	-3.02447	0.00249071	0.00829361
ENSG00000088926	0.0635986	F11	coagulation factor XI [Source:HGNC Symbol;Acc:HGNC:3529]	0	5.94781	0	1	NA	0.962587	5.94781	0.161839	0.871433	NA
ENSG00000088930	2447.47	XRN2	5'-3' exoribonuclease 2 [Source:HGNC Symbol;Acc:HGNC:12836]	-0.0776367	0.0373451	-2.0789	0.0376265	0.110636	0.0657294	0.0370818	1.77255	0.0763027	0.16497
ENSG00000088970	205.612	KIZ	kizuna centrosomal protein [Source:HGNC Symbol;Acc:HGNC:15865]	-0.192534	0.100674	-1.91244	0.0558193	0.14957	-0.34652	0.102478	-3.3814	0.000721176	0.00264214
ENSG00000088986	3026.54	DYNLL1	dynein light chain LC8-type 1 [Source:HGNC Symbol;Acc:HGNC:15476]	0.110656	0.0288941	3.82972	0.000128288	0.00102912	0.445302	0.0282494	15.7632	5.57158e-56	4.74506e-54
ENSG00000088992	44.6442	TESC	tescalcin [Source:HGNC Symbol;Acc:HGNC:26065]	0.145846	0.219315	0.665005	0.506047	0.688237	-0.626926	0.23564	-2.66053	0.00780184	0.0231371
ENSG00000089006	1902.5	SNX5	sorting nexin 5 [Source:HGNC Symbol;Acc:HGNC:14969]	-0.0860228	0.0351792	-2.44527	0.0144743	0.0532532	-0.166241	0.0354593	-4.68822	2.75596e-06	1.43796e-05
ENSG00000089009	26692.4	RPL6	ribosomal protein L6 [Source:HGNC Symbol;Acc:HGNC:10362]	-0.114236	0.0223655	-5.1077	3.26098e-07	4.90041e-06	0.120172	0.0222971	5.38956	7.06286e-08	4.47703e-07
ENSG00000089012	0	SIRPG	signal regulatory protein gamma [Source:HGNC Symbol;Acc:HGNC:15757]	NA	NA	NA	NA	NA	NA	NA	NA	NA	NA
ENSG00000089022	835.763	MAPKAPK5	MAPK activated protein kinase 5 [Source:HGNC Symbol;Acc:HGNC:6889]	-0.0662997	0.0553742	-1.1973	0.231188	0.415419	-0.129211	0.0557078	-2.31943	0.0203715	0.0537028
ENSG00000089041	17.0762	P2RX7	purinergic receptor P2X 7 [Source:HGNC Symbol;Acc:HGNC:8537]	0.124329	0.367513	0.338299	0.735138	NA	0.731938	0.346141	2.11456	0.0344671	0.0848065
ENSG00000089048	917.728	ESF1	ESF1 nucleolar pre-rRNA processing protein homolog [Source:HGNC Symbol;Acc:HGNC:15898]	0.252956	0.0491622	5.14532	2.67061e-07	4.10699e-06	0.158854	0.0495665	3.20487	0.00135126	0.00471968
ENSG00000089050	907.397	RBBP9	RB binding protein 9, serine hydrolase [Source:HGNC Symbol;Acc:HGNC:9892]	0.099187	0.0534147	1.85692	0.0633224	0.164018	-0.0427307	0.0540289	-0.790887	0.42901	0.599677
ENSG00000089053	4229.69	ANAPC5	anaphase promoting complex subunit 5 [Source:HGNC Symbol;Acc:HGNC:15713]	-0.0382769	0.0297661	-1.28593	0.198469	0.372862	-0.231239	0.030096	-7.68338	1.54947e-14	1.75665e-13
ENSG00000089057	466.14	SLC23A2	solute carrier family 23 member 2 [Source:HGNC Symbol;Acc:HGNC:10973]	0.128395	0.0616277	2.0834	0.0372147	0.109743	0.00588592	0.0624577	0.0942385	0.92492	0.95827
ENSG00000089060	303.323	SLC8B1	solute carrier family 8 member B1 [Source:HGNC Symbol;Acc:HGNC:26175]	-0.0576857	0.077823	-0.741242	0.458547	0.648508	-0.647031	0.083273	-7.77001	7.84824e-15	9.06302e-14
ENSG00000089063	2995.03	TMEM230	transmembrane protein 230 [Source:HGNC Symbol;Acc:HGNC:15876]	-0.0599156	0.0339083	-1.76699	0.0772304	0.190886	0.0535416	0.0337258	1.58756	0.112387	0.225532
ENSG00000089091	45.2605	DZANK1	double zinc ribbon and ankyrin repeat domains 1 [Source:HGNC Symbol;Acc:HGNC:15858]	-0.0145526	0.184713	-0.0787846	0.937204	0.969789	-0.363129	0.193635	-1.87533	0.0607475	0.136448
ENSG00000089094	579.709	KDM2B	lysine demethylase 2B [Source:HGNC Symbol;Acc:HGNC:13610]	0.106608	0.0545474	1.95441	0.0506533	0.13941	-0.19854	0.0564569	-3.51666	0.000437011	0.00166207
ENSG00000089101	10.4021	CFAP61	cilia and flagella associated protein 61 [Source:HGNC Symbol;Acc:HGNC:15872]	-0.515932	0.393493	-1.31116	0.189805	NA	-0.851561	0.41278	-2.06299	0.0391135	0.0945537
ENSG00000089116	0.268076	LHX5	LIM homeobox 5 [Source:HGNC Symbol;Acc:HGNC:14216]	-0.496414	2.95146	-0.168193	0.866432	NA	0.958973	2.95086	0.32498	0.745196	NA
ENSG00000089123	274.947	TASP1	taspase 1 [Source:HGNC Symbol;Acc:HGNC:15859]	-0.0387975	0.0782213	-0.495996	0.619897	0.773849	-0.208876	0.0798829	-2.61478	0.00892852	0.0261262
ENSG00000089127	22.6867	OAS1	2'-5'-oligoadenylate synthetase 1 [Source:HGNC Symbol;Acc:HGNC:8086]	-0.075562	0.269292	-0.280595	0.779021	NA	-0.0525157	0.269108	-0.195147	0.845278	0.911091
ENSG00000089154	6532.01	GCN1	GCN1 activator of EIF2AK4 [Source:HGNC Symbol;Acc:HGNC:4199]	0.0619632	0.0383539	1.61556	0.106189	0.240267	0.0505647	0.0383729	1.31772	0.187598	0.334989
ENSG00000089157	49612.9	RPLP0	ribosomal protein lateral stalk subunit P0 [Source:HGNC Symbol;Acc:HGNC:10371]	-0.120582	0.0229847	-5.24616	1.55305e-07	2.52088e-06	0.0744395	0.0229548	3.24288	0.0011833	0.00417514
ENSG00000089159	789.778	PXN	paxillin [Source:HGNC Symbol;Acc:HGNC:9718]	-0.065115	0.0533259	-1.22108	0.222057	0.403863	-0.0143837	0.0531602	-0.270573	0.786719	0.87685
ENSG00000089163	12.0249	SIRT4	sirtuin 4 [Source:HGNC Symbol;Acc:HGNC:14932]	0.219267	0.468064	0.468456	0.639459	NA	0.240544	0.467885	0.514109	0.607175	0.753387
ENSG00000089169	0.38789	RPH3A	rabphilin 3A [Source:HGNC Symbol;Acc:HGNC:17056]	-1.08696	2.53149	-0.429376	0.66765	NA	-1.07056	2.53149	-0.422896	0.672371	NA
ENSG00000089177	239.622	KIF16B	kinesin family member 16B [Source:HGNC Symbol;Acc:HGNC:15869]	0.130655	0.084813	1.54051	0.123436	0.268093	-0.302558	0.0893928	-3.38459	0.000712843	0.00261479
ENSG00000089195	466.774	TRMT6	tRNA methyltransferase 6 [Source:HGNC Symbol;Acc:HGNC:20900]	0.208083	0.0696224	2.98874	0.00280133	0.0139737	0.234978	0.0695692	3.37761	0.000731178	0.00267739
ENSG00000089199	0.293319	CHGB	chromogranin B [Source:HGNC Symbol;Acc:HGNC:1930]	0.946229	3.46119	0.273383	0.784559	NA	0	3.46119	0	1	NA
ENSG00000089220	8378.31	PEBP1	phosphatidylethanolamine binding protein 1 [Source:HGNC Symbol;Acc:HGNC:8630]	-0.0871014	0.0247582	-3.51808	0.000434687	0.00297877	-0.0649341	0.024752	-2.62338	0.00870612	0.0255356
ENSG00000089225	0.64847	TBX5	T-box transcription factor 5 [Source:HGNC Symbol;Acc:HGNC:11604]	-0.380738	1.78895	-0.212828	0.831461	NA	0.244355	1.69388	0.144258	0.885297	NA
ENSG00000089234	546.054	BRAP	BRCA1 associated protein [Source:HGNC Symbol;Acc:HGNC:1099]	0.0717803	0.0659838	1.08785	0.276663	0.466323	-0.0596762	0.0667462	-0.894077	0.371281	0.544425
ENSG00000089248	2650.23	ERP29	endoplasmic reticulum protein 29 [Source:HGNC Symbol;Acc:HGNC:13799]	-0.167282	0.0351932	-4.75325	2.00176e-06	2.57335e-05	-0.104672	0.0350895	-2.98299	0.0028545	0.00938072
ENSG00000089250	0.575464	NOS1	nitric oxide synthase 1 [Source:HGNC Symbol;Acc:HGNC:7872]	-1.04164	2.29351	-0.454168	0.649708	NA	-1.74658	2.29351	-0.761532	0.44634	NA
ENSG00000089280	3800.27	FUS	FUS RNA binding protein [Source:HGNC Symbol;Acc:HGNC:4010]	-0.00966859	0.0535831	-0.180441	0.856806	0.924887	-0.190311	0.053756	-3.54028	0.000399696	0.00153018
ENSG00000089289	639.927	IGBP1	immunoglobulin binding protein 1 [Source:HGNC Symbol;Acc:HGNC:5461]	-0.014226	0.0564778	-0.251886	0.801129	0.894019	0.404397	0.0544364	7.4288	1.09585e-13	1.16315e-12
ENSG00000089327	3.44991	FXYD5	FXYD domain containing ion transport regulator 5 [Source:HGNC Symbol;Acc:HGNC:4029]	0.310425	0.704028	0.440927	0.659266	NA	-0.9902	0.83888	-1.18038	0.237848	0.397561
ENSG00000089335	586.135	ZNF302	zinc finger protein 302 [Source:HGNC Symbol;Acc:HGNC:13848]	-0.0151991	0.0591718	-0.256864	0.797284	0.891514	-0.422989	0.0615998	-6.86673	6.56894e-12	6.01399e-11
ENSG00000089351	1101.24	GRAMD1A	GRAM domain containing 1A [Source:HGNC Symbol;Acc:HGNC:29305]	-0.270724	0.0524986	-5.15679	2.51221e-07	3.8861e-06	-0.251852	0.0524877	-4.79829	1.60022e-06	8.56521e-06
ENSG00000089356	8.81164	FXYD3	FXYD domain containing ion transport regulator 3 [Source:HGNC Symbol;Acc:HGNC:4027]	-0.779425	0.4593	-1.69699	0.0896992	NA	-0.85512	0.464291	-1.84178	0.0655079	0.14532
ENSG00000089472	28.5159	HEPH	hephaestin [Source:HGNC Symbol;Acc:HGNC:4866]	-0.28207	0.289129	-0.975588	0.329269	0.52385	0.304761	0.273957	1.11244	0.265948	0.430892
ENSG00000089486	1107.54	CDIP1	cell death inducing p53 target 1 [Source:HGNC Symbol;Acc:HGNC:13234]	-0.0746787	0.0426325	-1.75168	0.0798283	0.195691	-0.000255473	0.0423913	-0.00602654	0.995192	0.997033
ENSG00000089505	28.8689	CMTM1	CKLF like MARVEL transmembrane domain containing 1 [Source:HGNC Symbol;Acc:HGNC:19172]	0.0269601	0.255281	0.105609	0.915892	0.959625	0.626729	0.241832	2.59159	0.00955343	0.0276749
ENSG00000089558	4.64265	KCNH4	potassium voltage-gated channel subfamily H member 4 [Source:HGNC Symbol;Acc:HGNC:6253]	-0.28824	0.552006	-0.522169	0.601553	NA	-0.938936	0.596696	-1.57356	0.11559	0.230561
ENSG00000089597	12748.8	GANAB	glucosidase II alpha subunit [Source:HGNC Symbol;Acc:HGNC:4138]	-0.0326675	0.0241019	-1.35539	0.175294	0.342542	0.370462	0.0238812	15.5127	2.84567e-54	2.31167e-52
ENSG00000089639	421.612	GMIP	GEM interacting protein [Source:HGNC Symbol;Acc:HGNC:24852]	0.0723359	0.078193	0.925094	0.354917	0.550115	-0.177936	0.0799547	-2.22546	0.0260501	0.0666672
ENSG00000089682	452.645	RBM41	RNA binding motif protein 41 [Source:HGNC Symbol;Acc:HGNC:25617]	0.0717926	0.0834591	0.860213	0.389672	0.585308	0.304106	0.0824448	3.68861	0.000225487	0.000897062
ENSG00000089685	2777.56	BIRC5	baculoviral IAP repeat containing 5 [Source:HGNC Symbol;Acc:HGNC:593]	0.192145	0.0485043	3.9614	7.451e-05	0.000635677	0.78276	0.0478503	16.3585	3.7818e-60	3.71513e-58
ENSG00000089692	3.67599	LAG3	lymphocyte activating 3 [Source:HGNC Symbol;Acc:HGNC:6476]	-1.03486	0.853675	-1.21224	0.22542	NA	-1.18778	0.872726	-1.361	0.173515	0.316256
ENSG00000089693	7344.61	MLF2	myeloid leukemia factor 2 [Source:HGNC Symbol;Acc:HGNC:7126]	-0.0418395	0.019452	-2.15091	0.0314832	0.0969903	0.0655366	0.0193288	3.39062	0.000697336	0.00256325
ENSG00000089723	147.294	OTUB2	OTU deubiquitinase, ubiquitin aldehyde binding 2 [Source:HGNC Symbol;Acc:HGNC:20351]	-0.141234	0.114053	-1.23832	0.215596	0.395776	-0.464406	0.118382	-3.92294	8.74759e-05	0.000372605
ENSG00000089737	4944.69	DDX24	DEAD-box helicase 24 [Source:HGNC Symbol;Acc:HGNC:13266]	0.135595	0.0253052	5.35839	8.39671e-08	1.42258e-06	0.282648	0.0251227	11.2507	2.29836e-29	6.07556e-28
ENSG00000089775	454.185	ZBTB25	zinc finger and BTB domain containing 25 [Source:HGNC Symbol;Acc:HGNC:13112]	0.0235532	0.082436	0.285715	0.775096	0.878238	0.142705	0.0819529	1.7413	0.0816309	0.174383
ENSG00000089818	1737.7	NECAP1	NECAP endocytosis associated 1 [Source:HGNC Symbol;Acc:HGNC:24539]	0.0446359	0.0338485	1.3187	0.187271	0.358515	0.104475	0.0337153	3.09875	0.00194342	0.00660344
ENSG00000089820	69.7368	ARHGAP4	Rho GTPase activating protein 4 [Source:HGNC Symbol;Acc:HGNC:674]	-0.0915025	0.200352	-0.456708	0.647881	0.794181	-0.0560097	0.200073	-0.279947	0.779518	0.872531
ENSG00000089847	107.171	ANKRD24	ankyrin repeat domain 24 [Source:HGNC Symbol;Acc:HGNC:29424]	-0.303506	0.1282	-2.36744	0.0179118	0.0628699	-0.428174	0.130275	-3.28669	0.00101374	0.00362225
ENSG00000089876	1049.21	DHX32	DEAH-box helicase 32 (putative) [Source:HGNC Symbol;Acc:HGNC:16717]	-0.0863782	0.0467389	-1.8481	0.0645878	0.166778	-0.136481	0.0470026	-2.90369	0.0036879	0.0118251
ENSG00000089902	1702.17	RCOR1	REST corepressor 1 [Source:HGNC Symbol;Acc:HGNC:17441]	0.430483	0.0444769	9.67881	3.71012e-22	3.75692e-20	0.47795	0.0444106	10.7621	5.19897e-27	1.21334e-25
ENSG00000089916	891.299	GPATCH2L	G-patch domain containing 2 like [Source:HGNC Symbol;Acc:HGNC:20210]	0.0298944	0.0521734	0.572981	0.566657	0.735939	0.431012	0.0507554	8.49193	2.03227e-17	2.83325e-16
ENSG00000090006	815.921	LTBP4	latent transforming growth factor beta binding protein 4 [Source:HGNC Symbol;Acc:HGNC:6717]	0.0679869	0.061776	1.10054	0.271097	0.460539	-0.318108	0.0633878	-5.01845	5.20911e-07	2.97919e-06
ENSG00000090013	3121.95	BLVRB	biliverdin reductase B [Source:HGNC Symbol;Acc:HGNC:1063]	-0.138487	0.0479854	-2.88603	0.00390141	0.0184211	-0.270398	0.0481896	-5.61113	2.01012e-08	1.34057e-07
ENSG00000090020	1483.7	SLC9A1	solute carrier family 9 member A1 [Source:HGNC Symbol;Acc:HGNC:11071]	-0.0362535	0.041573	-0.872045	0.383184	0.578799	-0.336894	0.0426329	-7.90219	2.74044e-15	3.28122e-14
ENSG00000090054	1416.05	SPTLC1	serine palmitoyltransferase long chain base subunit 1 [Source:HGNC Symbol;Acc:HGNC:11277]	-0.0525238	0.0489756	-1.07245	0.283519	0.473482	0.244347	0.0482278	5.06652	4.05145e-07	2.34762e-06
ENSG00000090060	5361.28	PAPOLA	poly(A) polymerase alpha [Source:HGNC Symbol;Acc:HGNC:14981]	-0.0387766	0.0309477	-1.25297	0.210216	0.388882	0.289053	0.0306101	9.44308	3.61992e-21	6.34493e-20
ENSG00000090061	314.582	CCNK	cyclin K [Source:HGNC Symbol;Acc:HGNC:1596]	-0.0235607	0.0787462	-0.299198	0.764789	0.871435	0.225802	0.0770605	2.93019	0.00338757	0.0109435
ENSG00000090097	485.533	PCBP4	poly(rC) binding protein 4 [Source:HGNC Symbol;Acc:HGNC:8652]	-0.0609617	0.0777751	-0.783821	0.433145	0.624663	-0.246731	0.0789049	-3.12694	0.00176633	0.00603864
ENSG00000090104	0.38782	RGS1	regulator of G protein signaling 1 [Source:HGNC Symbol;Acc:HGNC:9991]	0.946253	2.55278	0.370675	0.71088	NA	2.25665	2.48511	0.908068	0.363842	NA
ENSG00000090238	269.361	YPEL3	yippee like 3 [Source:HGNC Symbol;Acc:HGNC:18327]	-0.244042	0.118521	-2.05907	0.0394879	0.114911	0.0641772	0.11653	0.550737	0.581814	0.733029
ENSG00000090263	1718.24	MRPS33	mitochondrial ribosomal protein S33 [Source:HGNC Symbol;Acc:HGNC:16634]	-0.0142978	0.0416793	-0.343043	0.731566	0.850711	0.0674187	0.0415129	1.62404	0.104367	0.212384
ENSG00000090266	602.808	NDUFB2	NADH:ubiquinone oxidoreductase subunit B2 [Source:HGNC Symbol;Acc:HGNC:7697]	-0.0936953	0.0608942	-1.53866	0.123888	0.26872	-0.133483	0.0611967	-2.18122	0.0291672	0.0736363
ENSG00000090273	3303.83	NUDC	nuclear distribution C, dynein complex regulator [Source:HGNC Symbol;Acc:HGNC:8045]	0.0233366	0.0363872	0.641341	0.521301	0.699805	-0.00133895	0.0364487	-0.0367352	0.970696	0.983391
ENSG00000090316	2053.33	MAEA	macrophage erythroblast attacher [Source:HGNC Symbol;Acc:HGNC:13731]	0.00642692	0.035999	0.178531	0.858306	0.925823	0.109176	0.0357839	3.05099	0.00228091	0.00765292
ENSG00000090339	0.511897	ICAM1	intercellular adhesion molecule 1 [Source:HGNC Symbol;Acc:HGNC:5344]	-1.11079	2.17578	-0.510523	0.609685	NA	-1.09438	2.17578	-0.502983	0.614976	NA
ENSG00000090372	1331.73	STRN4	striatin 4 [Source:HGNC Symbol;Acc:HGNC:15721]	-0.0596214	0.0427258	-1.39544	0.162882	0.325666	0.0697698	0.0423496	1.64747	0.0994611	0.203993
ENSG00000090376	0.654544	IRAK3	interleukin 1 receptor associated kinase 3 [Source:HGNC Symbol;Acc:HGNC:17020]	-0.802967	1.94234	-0.413402	0.679312	NA	-0.78098	1.94704	-0.40111	0.688339	NA
ENSG00000090382	0.43666	LYZ	lysozyme [Source:HGNC Symbol;Acc:HGNC:6740]	1.54602	2.51407	0.614945	0.538591	NA	0.241331	2.58342	0.093415	0.925574	NA
ENSG00000090402	47.7884	SI	sucrase-isomaltase [Source:HGNC Symbol;Acc:HGNC:10856]	-0.00371517	0.236379	-0.015717	0.98746	0.993421	0.101867	0.234198	0.43496	0.663591	0.792328
ENSG00000090432	611.02	MUL1	mitochondrial E3 ubiquitin protein ligase 1 [Source:HGNC Symbol;Acc:HGNC:25762]	0.187521	0.0620224	3.02344	0.00249915	0.0127275	-0.0632432	0.0633921	-0.997651	0.318449	0.49048
ENSG00000090447	496.456	TFAP4	transcription factor AP-4 [Source:HGNC Symbol;Acc:HGNC:11745]	0.403592	0.0696765	5.79236	6.9403e-09	1.48075e-07	0.19656	0.0707246	2.77923	0.00544872	0.0168077
ENSG00000090470	511.365	PDCD7	programmed cell death 7 [Source:HGNC Symbol;Acc:HGNC:8767]	-0.0944163	0.0596613	-1.58254	0.113526	0.252485	-0.198747	0.0604257	-3.28911	0.00100505	0.00359304
ENSG00000090487	2292.45	SPG21	SPG21 abhydrolase domain containing, maspardin [Source:HGNC Symbol;Acc:HGNC:20373]	-0.00203725	0.0352991	-0.0577138	0.953977	0.977973	0.0158325	0.0352947	0.448579	0.653736	0.785992
ENSG00000090512	0.186747	FETUB	fetuin B [Source:HGNC Symbol;Acc:HGNC:3658]	0	5.94781	0	1	NA	0	5.94781	0	1	NA
ENSG00000090520	981.841	DNAJB11	DnaJ heat shock protein family (Hsp40) member B11 [Source:HGNC Symbol;Acc:HGNC:14889]	-0.0836775	0.0563586	-1.48473	0.137614	0.289571	0.109879	0.0557959	1.9693	0.0489189	0.113866
ENSG00000090530	80.8286	P3H2	prolyl 3-hydroxylase 2 [Source:HGNC Symbol;Acc:HGNC:19317]	0.0919724	0.165831	0.554615	0.579158	0.745336	1.33935	0.14831	9.03073	1.70524e-19	2.72233e-18
ENSG00000090534	5.07471	THPO	thrombopoietin [Source:HGNC Symbol;Acc:HGNC:11795]	-0.112763	0.698111	-0.161526	0.87168	NA	-0.239574	0.712119	-0.336425	0.736551	0.843489
ENSG00000090539	19.5502	CHRD	chordin [Source:HGNC Symbol;Acc:HGNC:1949]	0.0262059	0.348358	0.0752269	0.940034	NA	-0.412536	0.368007	-1.121	0.262287	0.426661
ENSG00000090554	0.119748	FLT3LG	fms related tyrosine kinase 3 ligand [Source:HGNC Symbol;Acc:HGNC:3766]	-0.496396	5.94781	-0.0834586	0.933487	NA	-0.479991	5.94781	-0.0807005	0.93568	NA
ENSG00000090565	1219.17	RAB11FIP3	RAB11 family interacting protein 3 [Source:HGNC Symbol;Acc:HGNC:17224]	0.183164	0.0435106	4.20964	2.5578e-05	0.000249045	0.0726034	0.043939	1.65237	0.0984593	0.20241
ENSG00000090581	442.243	GNPTG	N-acetylglucosamine-1-phosphate transferase subunit gamma [Source:HGNC Symbol;Acc:HGNC:23026]	-0.0529936	0.0744193	-0.712096	0.476405	0.664105	-0.0634328	0.0745868	-0.850456	0.395072	0.567244
ENSG00000090612	635.787	ZNF268	zinc finger protein 268 [Source:HGNC Symbol;Acc:HGNC:13061]	-0.0808997	0.0659134	-1.22736	0.219686	0.400547	-0.233108	0.0666652	-3.4967	0.000471048	0.00178426
ENSG00000090615	3529.55	GOLGA3	golgin A3 [Source:HGNC Symbol;Acc:HGNC:4426]	0.0276522	0.037315	0.741048	0.458664	0.648534	-0.0395842	0.0374266	-1.05765	0.290216	0.458836
ENSG00000090621	3276.47	PABPC4	poly(A) binding protein cytoplasmic 4 [Source:HGNC Symbol;Acc:HGNC:8557]	0.0361149	0.040414	0.893622	0.371524	0.566648	0.149147	0.0402815	3.70261	0.000213397	0.000852659
ENSG00000090659	0.271054	CD209	CD209 molecule [Source:HGNC Symbol;Acc:HGNC:1641]	0.993446	3.22165	0.308365	0.757804	NA	-0.480013	3.22799	-0.148703	0.881788	NA
ENSG00000090661	1187.16	CERS4	ceramide synthase 4 [Source:HGNC Symbol;Acc:HGNC:23747]	-0.105718	0.0519982	-2.03311	0.0420418	0.12097	-0.331899	0.0529148	-6.27232	3.55699e-10	2.79803e-09
ENSG00000090674	420.779	MCOLN1	mucolipin 1 [Source:HGNC Symbol;Acc:HGNC:13356]	-0.0809825	0.0787609	-1.02821	0.303853	0.496761	0.0196172	0.0782924	0.250563	0.802152	0.88624
ENSG00000090686	768.823	USP48	ubiquitin specific peptidase 48 [Source:HGNC Symbol;Acc:HGNC:18533]	-0.0679743	0.0514255	-1.3218	0.186234	0.357218	0.0658357	0.0508858	1.29379	0.195737	0.345752
ENSG00000090776	199.699	EFNB1	ephrin B1 [Source:HGNC Symbol;Acc:HGNC:3226]	0.0264857	0.0975472	0.271516	0.785994	0.885076	-0.316951	0.10111	-3.13471	0.00172022	0.00590009
ENSG00000090857	245.196	PDPR	pyruvate dehydrogenase phosphatase regulatory subunit [Source:HGNC Symbol;Acc:HGNC:30264]	-0.119352	0.10295	-1.15932	0.246327	0.432123	0.0959115	0.101445	0.945457	0.344426	0.516905
ENSG00000090861	8323.17	AARS1	alanyl-tRNA synthetase 1 [Source:HGNC Symbol;Acc:HGNC:20]	-0.41731	0.031441	-13.2728	3.32891e-40	1.15348e-37	-0.465974	0.0314939	-14.7957	1.56179e-49	1.05726e-47
ENSG00000090863	3362.21	GLG1	golgi glycoprotein 1 [Source:HGNC Symbol;Acc:HGNC:4316]	-0.0592843	0.0258483	-2.29354	0.0218167	0.0734477	0.147715	0.0254035	5.81477	6.07162e-09	4.259e-08
ENSG00000090889	1138.65	KIF4A	kinesin family member 4A [Source:HGNC Symbol;Acc:HGNC:13339]	0.113687	0.0480412	2.36645	0.0179596	0.0629616	0.644352	0.0465678	13.8368	1.52771e-43	7.86992e-42
ENSG00000090905	1973.04	TNRC6A	trinucleotide repeat containing adaptor 6A [Source:HGNC Symbol;Acc:HGNC:11969]	0.110231	0.0386204	2.85421	0.00431441	0.0199631	0.0652567	0.038762	1.68352	0.0922741	0.192277
ENSG00000090924	153.424	PLEKHG2	pleckstrin homology and RhoGEF domain containing G2 [Source:HGNC Symbol;Acc:HGNC:29515]	-0.0584613	0.107249	-0.545098	0.585686	0.749778	-0.40917	0.111593	-3.66661	0.000245785	0.00097305
ENSG00000090932	112.297	DLL3	delta like canonical Notch ligand 3 [Source:HGNC Symbol;Acc:HGNC:2909]	0.164593	0.160111	1.02799	0.303955	0.496866	-0.0850973	0.162946	-0.522241	0.601503	0.748635
ENSG00000090971	385.799	NAT14	N-acetyltransferase 14 (putative) [Source:HGNC Symbol;Acc:HGNC:28918]	-0.0479768	0.0751054	-0.638793	0.522958	0.70104	-0.492602	0.0783898	-6.284	3.29967e-10	2.6024e-09
ENSG00000090975	186.656	PITPNM2	phosphatidylinositol transfer protein membrane associated 2 [Source:HGNC Symbol;Acc:HGNC:21044]	-0.0784518	0.110337	-0.71102	0.477072	0.664553	-0.420818	0.113838	-3.69663	0.000218478	0.000871972
ENSG00000090989	450.765	EXOC1	exocyst complex component 1 [Source:HGNC Symbol;Acc:HGNC:30380]	-0.076609	0.0636986	-1.20268	0.2291	0.413021	-0.149824	0.0643251	-2.32917	0.0198499	0.052498
ENSG00000091009	317.607	RBM27	RNA binding motif protein 27 [Source:HGNC Symbol;Acc:HGNC:29243]	0.0667565	0.0910943	0.732828	0.463663	0.653291	0.0490668	0.0913089	0.537371	0.591011	0.740447
ENSG00000091010	0.422659	POU4F3	POU class 4 homeobox 3 [Source:HGNC Symbol;Acc:HGNC:9220]	-0.515097	2.22423	-0.231584	0.816861	NA	-1.22004	2.22423	-0.548521	0.583335	NA
ENSG00000091039	5027.6	OSBPL8	oxysterol binding protein like 8 [Source:HGNC Symbol;Acc:HGNC:16396]	-0.175767	0.0408664	-4.30101	1.70022e-05	0.000172965	0.0570225	0.0407089	1.40074	0.161292	0.299144
ENSG00000091073	281.9	DTX2	deltex E3 ubiquitin ligase 2 [Source:HGNC Symbol;Acc:HGNC:15973]	-0.251089	0.0953948	-2.6321	0.00848589	0.0346597	-0.211506	0.0952294	-2.22101	0.02635	0.0673042
ENSG00000091106	5.16513	NLRC4	NLR family CARD domain containing 4 [Source:HGNC Symbol;Acc:HGNC:16412]	-0.637525	0.623826	-1.02196	0.3068	NA	-0.539107	0.618392	-0.871789	0.383324	0.556209
ENSG00000091127	676.452	PUS7	pseudouridine synthase 7 [Source:HGNC Symbol;Acc:HGNC:26033]	0.107189	0.0517604	2.07087	0.0383709	0.112422	0.0270443	0.0522479	0.517615	0.604727	0.75144
ENSG00000091128	17.0102	LAMB4	laminin subunit beta 4 [Source:HGNC Symbol;Acc:HGNC:6491]	-0.0716496	0.316418	-0.22644	0.820859	NA	0.790498	0.300008	2.63492	0.00841559	0.0247384
ENSG00000091129	3.37495	NRCAM	neuronal cell adhesion molecule [Source:HGNC Symbol;Acc:HGNC:7994]	0.608306	0.853869	0.712411	0.47621	NA	2.48381	0.750726	3.30854	0.000937828	0.00337385
ENSG00000091136	51.8406	LAMB1	laminin subunit beta 1 [Source:HGNC Symbol;Acc:HGNC:6486]	-0.0867932	0.18989	-0.457072	0.647619	0.794008	0.244338	0.184314	1.32567	0.18495	0.331691
ENSG00000091137	1.83631	SLC26A4	solute carrier family 26 member 4 [Source:HGNC Symbol;Acc:HGNC:8818]	0.541104	1.24353	0.435135	0.663464	NA	0.548696	1.24458	0.440868	0.659309	0.790058
ENSG00000091138	3.62283	SLC26A3	solute carrier family 26 member 3 [Source:HGNC Symbol;Acc:HGNC:3018]	-0.330998	0.62373	-0.530674	0.595645	NA	0.355729	0.586038	0.607006	0.543847	0.699804
ENSG00000091140	5142.82	DLD	dihydrolipoamide dehydrogenase [Source:HGNC Symbol;Acc:HGNC:2898]	-0.0629701	0.0280025	-2.24873	0.0245298	0.0803458	0.00468174	0.0279347	0.167596	0.866901	0.925439
ENSG00000091157	1507.62	WDR7	WD repeat domain 7 [Source:HGNC Symbol;Acc:HGNC:13490]	0.00237518	0.0448024	0.0530147	0.95772	0.980271	0.0403329	0.0447366	0.901563	0.367289	0.540593
ENSG00000091164	2219.67	TXNL1	thioredoxin like 1 [Source:HGNC Symbol;Acc:HGNC:12436]	-0.0428755	0.0396281	-1.08195	0.279277	0.468868	0.11794	0.0393145	2.99992	0.00270046	0.00891891
ENSG00000091181	1.87408	IL5RA	interleukin 5 receptor subunit alpha [Source:HGNC Symbol;Acc:HGNC:6017]	-0.772917	1.29025	-0.599046	0.549142	NA	0.465236	1.12701	0.412806	0.679749	0.803492
ENSG00000091262	34.7812	ABCC6	ATP binding cassette subfamily C member 6 [Source:HGNC Symbol;Acc:HGNC:57]	0.0486321	0.227483	0.213784	0.830716	0.910675	-0.359099	0.237574	-1.51152	0.130655	0.253963
ENSG00000091317	2021.93	CMTM6	CKLF like MARVEL transmembrane domain containing 6 [Source:HGNC Symbol;Acc:HGNC:19177]	-0.0573467	0.0478051	-1.19959	0.230297	0.41431	0.0529847	0.0476238	1.11257	0.265895	0.430892
ENSG00000091409	711.525	ITGA6	integrin subunit alpha 6 [Source:HGNC Symbol;Acc:HGNC:6142]	-0.103205	0.0594958	-1.73466	0.0828013	0.200958	-0.690768	0.062318	-11.0846	1.49071e-28	3.76167e-27
ENSG00000091428	6.01654	RAPGEF4	Rap guanine nucleotide exchange factor 4 [Source:HGNC Symbol;Acc:HGNC:16626]	0.14465	0.636548	0.227241	0.820237	NA	-0.417989	0.674066	-0.620101	0.535191	0.69276
ENSG00000091436	454.619	MAP3K20	mitogen-activated protein kinase kinase kinase 20 [Source:HGNC Symbol;Acc:HGNC:17797]	0.192764	0.0686769	2.80682	0.00500334	0.0225838	0.658387	0.0664236	9.91195	3.69371e-23	7.17707e-22
ENSG00000091482	0	SMPX	small muscle protein X-linked [Source:HGNC Symbol;Acc:HGNC:11122]	NA	NA	NA	NA	NA	NA	NA	NA	NA	NA
ENSG00000091483	3600.8	FH	fumarate hydratase [Source:HGNC Symbol;Acc:HGNC:3700]	-0.0483848	0.0314101	-1.54042	0.123457	0.268095	0.064596	0.0312508	2.06702	0.0387323	0.0936967
ENSG00000091490	3996.94	SEL1L3	SEL1L family member 3 [Source:HGNC Symbol;Acc:HGNC:29108]	-0.326131	0.0344041	-9.47941	2.55713e-21	2.49349e-19	-1.04285	0.0356864	-29.2226	1.00058e-187	1.50952e-184
ENSG00000091513	1.22605	TF	transferrin [Source:HGNC Symbol;Acc:HGNC:11740]	0.0463466	1.16985	0.0396175	0.968398	NA	-3.37577	1.46568	-2.30321	0.0212672	NA
ENSG00000091527	4314.99	CDV3	CDV3 homolog [Source:HGNC Symbol;Acc:HGNC:26928]	0.125602	0.030149	4.16604	3.09939e-05	0.000295013	0.104348	0.030197	3.45556	0.000549157	0.00205381
ENSG00000091536	6.47465	MYO15A	myosin XVA [Source:HGNC Symbol;Acc:HGNC:7594]	-0.225991	0.542204	-0.416801	0.676824	NA	-0.958711	0.598975	-1.60059	0.109468	0.220893
ENSG00000091542	2490.41	ALKBH5	alkB homolog 5, RNA demethylase [Source:HGNC Symbol;Acc:HGNC:25996]	-0.0457593	0.0331545	-1.38018	0.16753	0.33216	-0.232563	0.0336542	-6.91037	4.83408e-12	4.484e-11
ENSG00000091583	0.155016	APOH	apolipoprotein H [Source:HGNC Symbol;Acc:HGNC:616]	-0.496408	5.09522	-0.0974261	0.922388	NA	0.96546	5.09468	0.189504	0.849698	NA
ENSG00000091592	0.444726	NLRP1	NLR family pyrin domain containing 1 [Source:HGNC Symbol;Acc:HGNC:14374]	-0.411605	2.08257	-0.197643	0.843325	NA	-2.79018	2.19991	-1.26831	0.204686	NA
ENSG00000091622	60.4494	PITPNM3	PITPNM family member 3 [Source:HGNC Symbol;Acc:HGNC:21043]	-0.12512	0.16998	-0.736083	0.46168	0.651375	-1.02232	0.191765	-5.33109	9.76275e-08	6.0754e-07
ENSG00000091640	810.637	SPAG7	sperm associated antigen 7 [Source:HGNC Symbol;Acc:HGNC:11216]	-0.0601526	0.053281	-1.12897	0.25891	0.446814	0.320431	0.0516979	6.19814	5.71338e-10	4.4041e-09
ENSG00000091651	1021.2	ORC6	origin recognition complex subunit 6 [Source:HGNC Symbol;Acc:HGNC:17151]	0.321179	0.0507154	6.33296	2.40503e-10	6.89757e-09	0.750318	0.0495907	15.1302	1.02359e-51	7.58568e-50
ENSG00000091656	88.8511	ZFHX4	zinc finger homeobox 4 [Source:HGNC Symbol;Acc:HGNC:30939]	-0.0371885	0.141543	-0.262737	0.792753	0.889061	0.161381	0.138905	1.16181	0.245313	0.4065
ENSG00000091664	0.122517	SLC17A6	solute carrier family 17 member 6 [Source:HGNC Symbol;Acc:HGNC:16703]	-0.496398	5.47476	-0.0906702	0.927755	NA	0.241343	5.47476	0.0440829	0.964838	NA
ENSG00000091704	0.033796	CPA1	carboxypeptidase A1 [Source:HGNC Symbol;Acc:HGNC:2296]	0.946195	5.94781	0.159083	0.873603	NA	0	5.94781	0	1	NA
ENSG00000091732	409.328	ZC3HC1	zinc finger C3HC-type containing 1 [Source:HGNC Symbol;Acc:HGNC:29913]	0.254861	0.0701816	3.63145	0.000281829	0.00203622	0.619961	0.0681514	9.09682	9.30163e-20	1.50659e-18
ENSG00000091831	0.195759	ESR1	estrogen receptor 1 [Source:HGNC Symbol;Acc:HGNC:3467]	-0.496408	3.79357	-0.130855	0.89589	NA	-0.480003	3.79357	-0.126531	0.899312	NA
ENSG00000091844	179.581	RGS17	regulator of G protein signaling 17 [Source:HGNC Symbol;Acc:HGNC:14088]	0.0529917	0.127257	0.416414	0.677107	0.815055	-0.106928	0.129111	-0.828189	0.407563	0.578738
ENSG00000091879	67.8821	ANGPT2	angiopoietin 2 [Source:HGNC Symbol;Acc:HGNC:485]	0.0371632	0.185545	0.200293	0.841252	0.916364	0.687949	0.177356	3.87893	0.000104919	0.000440642
ENSG00000091947	347.184	TMEM101	transmembrane protein 101 [Source:HGNC Symbol;Acc:HGNC:28653]	0.0461542	0.0748889	0.616302	0.537695	0.712956	-0.29963	0.0775619	-3.86311	0.000111951	0.000467758
ENSG00000091972	10.4962	CD200	CD200 molecule [Source:HGNC Symbol;Acc:HGNC:7203]	-0.2202	0.442991	-0.497077	0.619135	NA	-1.00921	0.501946	-2.0106	0.0443678	0.104973
ENSG00000091986	50.4781	CCDC80	coiled-coil domain containing 80 [Source:HGNC Symbol;Acc:HGNC:30649]	-0.117272	0.232582	-0.504217	0.614109	0.770357	-0.0231083	0.230536	-0.100238	0.920156	0.955581
ENSG00000092009	1.06275	CMA1	chymase 1 [Source:HGNC Symbol;Acc:HGNC:2097]	-0.762238	1.42652	-0.534333	0.593111	NA	-1.31422	1.53939	-0.853725	0.393257	NA
ENSG00000092010	1721.81	PSME1	proteasome activator subunit 1 [Source:HGNC Symbol;Acc:HGNC:9568]	-0.161584	0.0434295	-3.72061	0.000198744	0.00150187	-0.108677	0.0433273	-2.50829	0.0121318	0.0341694
ENSG00000092020	229.185	PPP2R3C	protein phosphatase 2 regulatory subunit B''gamma [Source:HGNC Symbol;Acc:HGNC:17485]	0.0140433	0.0876206	0.160274	0.872665	0.934219	0.243101	0.0858113	2.83297	0.00461173	0.0145033
ENSG00000092036	126.019	HAUS4	HAUS augmin like complex subunit 4 [Source:HGNC Symbol;Acc:HGNC:20163]	-0.0325213	0.120597	-0.269669	0.787415	0.885723	0.316077	0.116608	2.7106	0.00671609	0.0202673
ENSG00000092051	1.03621	JPH4	junctophilin 4 [Source:HGNC Symbol;Acc:HGNC:20156]	-0.388644	1.24905	-0.31115	0.755686	NA	-1.33951	1.43671	-0.932346	0.351158	NA
ENSG00000092054	0.996272	MYH7	myosin heavy chain 7 [Source:HGNC Symbol;Acc:HGNC:7577]	-0.557632	1.35764	-0.410737	0.681265	NA	-2.9994	1.53918	-1.9487	0.0513313	NA
ENSG00000092067	0.0635995	CEBPE	CCAAT enhancer binding protein epsilon [Source:HGNC Symbol;Acc:HGNC:1836]	0.946182	5.94781	0.159081	0.873605	NA	0	5.94781	0	1	NA
ENSG00000092068	2994.48	SLC7A8	solute carrier family 7 member 8 [Source:HGNC Symbol;Acc:HGNC:11066]	-0.131556	0.0404437	-3.25283	0.00114261	0.00665548	-0.396695	0.0409237	-9.69353	3.21234e-22	5.96726e-21
ENSG00000092094	403.101	OSGEP	O-sialoglycoprotein endopeptidase [Source:HGNC Symbol;Acc:HGNC:18028]	-0.0155754	0.0677786	-0.229798	0.818249	0.904174	0.0505022	0.0674453	0.748788	0.453985	0.62187
ENSG00000092096	334.947	SLC22A17	solute carrier family 22 member 17 [Source:HGNC Symbol;Acc:HGNC:23095]	-0.154414	0.0973704	-1.58585	0.112774	0.251067	0.174038	0.0954905	1.82257	0.0683685	0.150606
ENSG00000092098	7.311	RNF31	ring finger protein 31 [Source:HGNC Symbol;Acc:HGNC:16031]	-1.04898	0.470413	-2.22991	0.0257534	NA	-0.972574	0.466515	-2.08477	0.0370906	0.0902419
ENSG00000092108	1939.57	SCFD1	sec1 family domain containing 1 [Source:HGNC Symbol;Acc:HGNC:20726]	-0.0281391	0.0401489	-0.700869	0.483385	0.669044	0.174075	0.0397026	4.38446	1.16273e-05	5.60558e-05
ENSG00000092140	1311.47	G2E3	G2/M-phase specific E3 ubiquitin protein ligase [Source:HGNC Symbol;Acc:HGNC:20338]	0.111458	0.0563242	1.97887	0.0478309	0.133371	0.222926	0.056109	3.97309	7.09476e-05	0.000306611
ENSG00000092148	5905.13	HECTD1	HECT domain E3 ubiquitin protein ligase 1 [Source:HGNC Symbol;Acc:HGNC:20157]	0.0635026	0.0355198	1.78781	0.0738067	0.184643	-0.035261	0.0356277	-0.989708	0.322317	0.494132
ENSG00000092199	10910.1	HNRNPC	heterogeneous nuclear ribonucleoprotein C [Source:HGNC Symbol;Acc:HGNC:5035]	-0.0556542	0.0228983	-2.4305	0.0150781	0.0548462	-0.100174	0.0229436	-4.36608	1.26494e-05	6.07064e-05
ENSG00000092200	16.0008	RPGRIP1	RPGR interacting protein 1 [Source:HGNC Symbol;Acc:HGNC:13436]	-0.0568895	0.329377	-0.172719	0.862873	NA	-0.160398	0.333859	-0.480435	0.630918	0.770974
ENSG00000092201	3919.1	SUPT16H	SPT16 homolog, facilitates chromatin remodeling subunit [Source:HGNC Symbol;Acc:HGNC:11465]	-0.0301681	0.0335958	-0.897972	0.3692	0.564478	-0.0528143	0.033649	-1.56957	0.116516	0.231995
ENSG00000092203	1810.89	TOX4	TOX high mobility group box family member 4 [Source:HGNC Symbol;Acc:HGNC:20161]	0.205062	0.0340037	6.03058	1.63372e-09	4.01051e-08	0.34076	0.0336661	10.1218	4.42398e-24	8.95867e-23
ENSG00000092208	361.85	GEMIN2	gem nuclear organelle associated protein 2 [Source:HGNC Symbol;Acc:HGNC:10884]	0.37739	0.0758179	4.97758	6.43825e-07	9.14274e-06	0.90774	0.0728911	12.4534	1.34055e-35	4.76662e-34
ENSG00000092295	60.3718	TGM1	transglutaminase 1 [Source:HGNC Symbol;Acc:HGNC:11777]	-0.550156	0.191995	-2.86546	0.004164	0.0193624	-0.361438	0.188754	-1.91486	0.0555104	0.126469
ENSG00000092330	938.687	TINF2	TERF1 interacting nuclear factor 2 [Source:HGNC Symbol;Acc:HGNC:11824]	-0.206967	0.0477723	-4.33236	1.47521e-05	0.000152311	-0.467153	0.0490755	-9.51906	1.74755e-21	3.12532e-20
ENSG00000092345	0	DAZL	deleted in azoospermia like [Source:HGNC Symbol;Acc:HGNC:2685]	NA	NA	NA	NA	NA	NA	NA	NA	NA	NA
ENSG00000092377	44.9796	TBL1Y	transducin beta like 1 Y-linked [Source:HGNC Symbol;Acc:HGNC:18502]	-0.41777	0.219029	-1.90737	0.056473	0.150916	-0.812266	0.228561	-3.55383	0.00037966	0.00145717
ENSG00000092421	1257.88	SEMA6A	semaphorin 6A [Source:HGNC Symbol;Acc:HGNC:10738]	0.0232704	0.0501773	0.463764	0.642817	0.790845	-0.615143	0.0531329	-11.5774	5.36229e-31	1.54091e-29
ENSG00000092439	1893.04	TRPM7	transient receptor potential cation channel subfamily M member 7 [Source:HGNC Symbol;Acc:HGNC:17994]	-0.104124	0.0469236	-2.21902	0.0264856	0.0850721	0.111418	0.046504	2.39589	0.0165803	0.0448048
ENSG00000092445	814.446	TYRO3	TYRO3 protein tyrosine kinase [Source:HGNC Symbol;Acc:HGNC:12446]	0.0385409	0.0504914	0.763316	0.445275	0.635817	-0.208835	0.0517652	-4.03427	5.47721e-05	0.000240758
ENSG00000092470	333.1	WDR76	WD repeat domain 76 [Source:HGNC Symbol;Acc:HGNC:25773]	0.55838	0.0756155	7.38446	1.5307e-13	6.92447e-12	0.80419	0.0743456	10.8169	2.86247e-27	6.78544e-26
ENSG00000092529	3.85034	CAPN3	calpain 3 [Source:HGNC Symbol;Acc:HGNC:1480]	0.226024	0.791449	0.285582	0.775198	NA	1.72107	0.691311	2.48958	0.0127895	0.0357765
ENSG00000092531	252.202	SNAP23	synaptosome associated protein 23 [Source:HGNC Symbol;Acc:HGNC:11131]	-0.0412275	0.0851945	-0.483923	0.628441	0.780049	0.0319164	0.084706	0.37679	0.70633	0.821226
ENSG00000092607	25.9739	TBX15	T-box transcription factor 15 [Source:HGNC Symbol;Acc:HGNC:11594]	0.0672417	0.24884	0.270221	0.78699	0.885691	0.525631	0.242284	2.16949	0.0300458	0.0754845
ENSG00000092621	8785.89	PHGDH	phosphoglycerate dehydrogenase [Source:HGNC Symbol;Acc:HGNC:8923]	-0.404966	0.0452452	-8.95047	3.53982e-19	2.85879e-17	-0.973417	0.0456099	-21.3422	4.60377e-101	1.27942e-98
ENSG00000092758	39.1036	COL9A3	collagen type IX alpha 3 chain [Source:HGNC Symbol;Acc:HGNC:2219]	-0.0744125	0.24499	-0.303737	0.761328	0.869447	-0.618791	0.261141	-2.36957	0.017809	0.0477279
ENSG00000092820	2789.5	EZR	ezrin [Source:HGNC Symbol;Acc:HGNC:12691]	0.0658243	0.0324135	2.03077	0.0422785	0.121545	0.251169	0.0320891	7.82724	4.98704e-15	5.85825e-14
ENSG00000092841	3605.52	MYL6	myosin light chain 6 [Source:HGNC Symbol;Acc:HGNC:7587]	-0.140758	0.0449414	-3.13204	0.00173595	0.00945079	0.120246	0.0446453	2.69337	0.00707347	0.0212154
ENSG00000092847	1875.56	AGO1	argonaute RISC component 1 [Source:HGNC Symbol;Acc:HGNC:3262]	-0.0846128	0.0440075	-1.92269	0.0545189	0.147037	-0.132777	0.0441624	-3.00657	0.00264217	0.00874692
ENSG00000092850	3.58961	TEKT2	tektin 2 [Source:HGNC Symbol;Acc:HGNC:11725]	-0.390712	0.663803	-0.588596	0.556133	NA	-0.951295	0.713703	-1.3329	0.182564	0.328697
ENSG00000092853	1059.68	CLSPN	claspin [Source:HGNC Symbol;Acc:HGNC:19715]	0.631604	0.0613504	10.295	7.42059e-25	9.76847e-23	1.17166	0.0602774	19.4378	3.69828e-84	7.43917e-82
ENSG00000092871	397.857	RFFL	ring finger and FYVE like domain containing E3 ubiquitin protein ligase [Source:HGNC Symbol;Acc:HGNC:24821]	0.159533	0.0701448	2.27433	0.0229459	0.0764321	-0.193056	0.0724995	-2.66286	0.0077479	0.0230062
ENSG00000092929	17.9155	UNC13D	unc-13 homolog D [Source:HGNC Symbol;Acc:HGNC:23147]	-0.369233	0.327788	-1.12644	0.259979	NA	-0.579679	0.337495	-1.71759	0.0858708	0.181513
ENSG00000092931	479.344	MFSD11	major facilitator superfamily domain containing 11 [Source:HGNC Symbol;Acc:HGNC:25458]	-0.210647	0.0656795	-3.2072	0.00134033	0.00759868	-0.156212	0.0654418	-2.38704	0.0169847	0.0457744
ENSG00000092964	338.038	DPYSL2	dihydropyrimidinase like 2 [Source:HGNC Symbol;Acc:HGNC:3014]	0.0570755	0.0845149	0.67533	0.499466	0.682688	0.354091	0.0827139	4.28091	1.86126e-05	8.72625e-05
ENSG00000092969	6.03225	TGFB2	transforming growth factor beta 2 [Source:HGNC Symbol;Acc:HGNC:11768]	0.421248	0.504377	0.835185	0.403614	NA	0.66676	0.496915	1.3418	0.179661	0.32466
ENSG00000092978	805.833	GPATCH2	G-patch domain containing 2 [Source:HGNC Symbol;Acc:HGNC:25499]	0.562242	0.0606349	9.27258	1.817e-20	1.66104e-18	0.659163	0.0603601	10.9205	9.19757e-28	2.23547e-26
ENSG00000093000	2235.78	NUP50	nucleoporin 50 [Source:HGNC Symbol;Acc:HGNC:8065]	0.17992	0.0432672	4.15835	3.2055e-05	0.000304015	0.445162	0.0428624	10.3858	2.87609e-25	6.17336e-24
ENSG00000093009	806.485	CDC45	cell division cycle 45 [Source:HGNC Symbol;Acc:HGNC:1739]	0.00836446	0.0589706	0.141841	0.887205	0.943611	0.574306	0.0571535	10.0485	9.32884e-24	1.8694e-22
ENSG00000093010	3277.93	COMT	catechol-O-methyltransferase [Source:HGNC Symbol;Acc:HGNC:2228]	0.0133761	0.0421296	0.317499	0.750865	0.862896	0.0585831	0.0420888	1.39189	0.163955	0.302972
ENSG00000093072	36.5597	ADA2	adenosine deaminase 2 [Source:HGNC Symbol;Acc:HGNC:1839]	-0.047517	0.263992	-0.179994	0.857157	0.92517	-0.0798103	0.264946	-0.301232	0.763238	0.861728
ENSG00000093100	0.651081	AC016026.1	novel transcript	-1.11986	1.67574	-0.668281	0.503954	NA	-0.503767	1.5752	-0.319812	0.749111	NA
ENSG00000093134	0	VNN3	vanin 3 [Source:HGNC Symbol;Acc:HGNC:16431]	NA	NA	NA	NA	NA	NA	NA	NA	NA	NA
ENSG00000093144	127.753	ECHDC1	ethylmalonyl-CoA decarboxylase 1 [Source:HGNC Symbol;Acc:HGNC:21489]	-0.0279572	0.112963	-0.247489	0.80453	0.896167	0.141652	0.111055	1.27551	0.202129	0.354284
[truncated: 58,685 more rows]

## Sheet: SLC Genes
Ensembl ID	Gene Name	BaseMean	GCN2iB - 6 hours					GCN2iB - 24 hours
			Log2 FC	SE	Wald Stat	p-val	p-adj	Log2 FC	SE	Wald Stat	p-val	p-adj
ENSG00000003989	SLC7A2	467.902	0.186018	0.0890851	2.08809	0.0367896	0.108831	0.306414	0.0886615	3.456	0.000548264	0.0020517
ENSG00000004809	SLC22A16	2.89712	-0.371368	0.893837	-0.415476	0.677794	NA	0.895589	0.805067	1.11244	0.265949	0.430892
ENSG00000004864	SLC25A13	1107.05	-0.0250172	0.0435522	-0.574419	0.565684	0.735474	-0.0161524	0.0435799	-0.370639	0.710906	0.824528
ENSG00000004939	SLC4A1	1.08822	-0.112911	1.31056	-0.0861546	0.931344	NA	-0.0759115	1.30775	-0.0580474	0.953711	NA
ENSG00000005022	SLC25A5	7981.77	-0.0785048	0.0262279	-2.99317	0.00276092	0.0138298	0.0686727	0.0261181	2.62931	0.00855581	0.0251331
ENSG00000007216	SLC13A2	0.0289253	0	5.94781	0	1	NA	0	5.94781	0	1	NA
ENSG00000010379	SLC6A13	0.707703	-0.452102	1.73009	-0.261317	0.793848	NA	-0.485311	1.73686	-0.279418	0.779924	NA
ENSG00000011083	SLC6A7	0.0989072	0	5.94781	0	1	NA	0	5.94781	0	1	NA
ENSG00000013293	SLC7A14	0.0377402	0	5.94781	0	1	NA	0	5.94781	0	1	NA
ENSG00000013306	SLC25A39	4272.22	-0.0747337	0.0327001	-2.28542	0.022288	0.0746752	-0.0856751	0.032737	-2.61707	0.0088688	0.0259695
ENSG00000014824	SLC30A9	3689.78	-0.0319798	0.0365841	-0.874143	0.38204	0.577602	0.28753	0.0361782	7.94761	1.90147e-15	2.31342e-14
ENSG00000017483	SLC38A5	1.8372	-1.06139	0.978454	-1.08476	0.278029	NA	-2.47694	1.1802	-2.09875	0.0358391	0.0876615
ENSG00000018280	SLC11A1	46.7399	-0.0623937	0.243563	-0.256171	0.797819	0.891628	-0.0400104	0.243445	-0.164351	0.869455	0.927041
ENSG00000021488	SLC7A9	1.62036	0.38934	1.03774	0.375182	0.707525	NA	0.0918942	1.062	0.0865291	0.931046	0.962254
ENSG00000022567	SLC45A4	348.198	0.0594407	0.0777916	0.764102	0.444806	0.635355	-0.299995	0.0804908	-3.72707	0.000193722	0.000779353
ENSG00000029364	SLC39A9	3730.6	0.0423842	0.034252	1.23742	0.21593	0.396067	0.212965	0.0340354	6.25717	3.92019e-10	3.06547e-09
ENSG00000033867	SLC4A7	1443.26	0.251505	0.0625939	4.01804	5.8684e-05	0.00051194	0.43204	0.0623118	6.93352	4.10493e-12	3.82783e-11
ENSG00000036565	SLC18A1	0.0575369	0	5.94781	0	1	NA	0	5.94781	0	1	NA
ENSG00000040487	SLC66A1	207.618	0.150664	0.0937224	1.60755	0.107933	0.243127	0.200874	0.0934176	2.15028	0.0315328	0.0785846
ENSG00000050438	SLC4A8	3.97862	-0.113815	0.728394	-0.156255	0.875832	NA	0.525417	0.681556	0.770909	0.440761	0.610013
ENSG00000059804	SLC2A3	6.32305	-0.264134	0.467469	-0.565029	0.572054	NA	0.970409	0.429435	2.25973	0.0238378	0.061731
ENSG00000063127	SLC6A16	3.55261	0.620471	0.804469	0.77128	0.440541	NA	-0.492579	0.913924	-0.538972	0.589906	0.739652
ENSG00000064651	SLC12A2	1310.81	0.163721	0.0443668	3.69017	0.000224105	0.00166485	0.548221	0.0432707	12.6696	8.71854e-37	3.28243e-35
ENSG00000065054	SLC9A3R2	1635.26	0.0552292	0.054896	1.00607	0.314382	0.508231	-0.465061	0.0560432	-8.29826	1.05651e-16	1.39903e-15
ENSG00000065923	SLC9A7	1564.23	-0.050566	0.0465319	-1.08669	0.277172	0.466943	0.116312	0.0460668	2.52485	0.0115746	0.0328091
ENSG00000066230	SLC9A3	23.1653	0.270503	0.271605	0.995941	0.319279	NA	-0.480228	0.297598	-1.61368	0.106597	0.216173
ENSG00000070214	SLC44A1	1824.86	0.037539	0.0385155	0.974646	0.329736	0.524232	0.46132	0.0373588	12.3484	4.97051e-35	1.72668e-33
ENSG00000070915	SLC12A3	4.78591	-1.35776	0.686954	-1.97649	0.0480994	NA	-4.23289	1.13203	-3.73919	0.000184614	0.000745835
ENSG00000072041	SLC6A15	0	NA	NA	NA	NA	NA	NA	NA	NA	NA	NA
ENSG00000074621	SLC24A1	265.432	-0.132265	0.0839895	-1.57478	0.115306	0.254723	-0.603551	0.0885433	-6.81645	9.33169e-12	8.44089e-11
ENSG00000074803	SLC12A1	0.59487	0.946259	2.05444	0.460593	0.645091	NA	2.2737	1.96763	1.15556	0.247863	NA
ENSG00000075303	SLC25A40	762.285	0.0982982	0.0569516	1.726	0.084348	0.203737	0.732324	0.0546455	13.4014	5.93727e-41	2.70845e-39
ENSG00000075415	SLC25A3	10136.2	-0.00858507	0.0216544	-0.396458	0.691767	0.823217	0.154673	0.0215321	7.18335	6.80223e-13	6.78328e-12
ENSG00000076351	SLC46A1	338.193	0.185755	0.0793502	2.34095	0.0192348	0.066354	-0.298024	0.0829249	-3.5939	0.000325768	0.00126574
ENSG00000077713	SLC25A43	0.732124	0.811301	1.87788	0.43203	0.66572	NA	0.847913	1.87525	0.45216	0.651154	NA
ENSG00000079215	SLC1A3	32.5782	0.18984	0.262507	0.72318	0.469569	0.658463	-0.406382	0.276001	-1.47239	0.140915	0.269491
ENSG00000080189	SLC35C2	1022.92	0.022259	0.0541688	0.41092	0.681131	0.817159	-0.0468619	0.0544581	-0.860513	0.389507	0.562015
ENSG00000080493	SLC4A4	2337.05	0.119759	0.0396161	3.02298	0.00250302	0.0127404	-0.305373	0.0404568	-7.54813	4.41544e-14	4.83706e-13
ENSG00000081800	SLC13A1	0.784971	-0.828077	1.57612	-0.525388	0.599313	NA	-0.363502	1.51501	-0.239933	0.810382	NA
ENSG00000083807	SLC27A5	396.971	-0.169814	0.0754613	-2.25035	0.0244268	0.0800882	-0.225921	0.0759488	-2.97465	0.00293324	0.00960959
ENSG00000084453	SLCO1A2	0.0283639	-0.496359	5.94781	-0.0834525	0.933492	NA	-0.479955	5.94781	-0.0806945	0.935685	NA
ENSG00000085491	SLC25A24	311.695	-0.0110578	0.0933684	-0.118432	0.905725	0.954629	0.13448	0.0925289	1.45339	0.146117	0.27718
ENSG00000088386	SLC15A1	0.173607	-1.18682	4.94008	-0.240244	0.810141	NA	-1.17042	4.94008	-0.236923	0.812716	NA
ENSG00000088836	SLC4A11	85.9205	-0.000383736	0.140508	-0.00273107	0.997821	0.998655	-0.685854	0.15399	-4.45389	8.43272e-06	4.13243e-05
ENSG00000089057	SLC23A2	466.14	0.128395	0.0616277	2.0834	0.0372147	0.109743	0.00588592	0.0624577	0.0942385	0.92492	0.95827
ENSG00000089060	SLC8B1	303.323	-0.0576857	0.077823	-0.741242	0.458547	0.648508	-0.647031	0.083273	-7.77001	7.84824e-15	9.06302e-14
ENSG00000090020	SLC9A1	1483.7	-0.0362535	0.041573	-0.872045	0.383184	0.578799	-0.336894	0.0426329	-7.90219	2.74044e-15	3.28122e-14
ENSG00000091137	SLC26A4	1.83631	0.541104	1.24353	0.435135	0.663464	NA	0.548696	1.24458	0.440868	0.659309	0.790058
ENSG00000091138	SLC26A3	3.62283	-0.330998	0.62373	-0.530674	0.595645	NA	0.355729	0.586038	0.607006	0.543847	0.699804
ENSG00000091664	SLC17A6	0.122517	-0.496398	5.47476	-0.0906702	0.927755	NA	0.241343	5.47476	0.0440829	0.964838	NA
ENSG00000092068	SLC7A8	2994.48	-0.131556	0.0404437	-3.25283	0.00114261	0.00665548	-0.396695	0.0409237	-9.69353	3.21234e-22	5.96726e-21
ENSG00000092096	SLC22A17	334.947	-0.154414	0.0973704	-1.58585	0.112774	0.251067	0.174038	0.0954905	1.82257	0.0683685	0.150606
ENSG00000099960	SLC7A4	0.180348	0	5.5251	0	1	NA	0	5.5251	0	1	NA
ENSG00000100036	SLC35E4	89.9006	0.358058	0.150134	2.38492	0.0170828	0.0606156	-0.151238	0.15804	-0.956961	0.338587	0.511662
ENSG00000100075	SLC25A1	2446.86	0.0801477	0.0441084	1.81706	0.0692079	0.175574	0.0106028	0.0442541	0.239589	0.810649	0.891199
ENSG00000100156	SLC16A8	13.1742	-0.338764	0.417504	-0.811404	0.417134	NA	-0.828083	0.44064	-1.87927	0.0602072	0.135453
ENSG00000100170	SLC5A1	25.3584	0.281649	0.36969	0.761852	0.446149	0.636644	-0.28122	0.397713	-0.707092	0.479509	0.645571
ENSG00000100191	SLC5A4	2.98721	0.204732	0.907141	0.22569	0.821443	NA	-0.685549	0.971823	-0.705425	0.480546	0.646554
ENSG00000100372	SLC25A17	1472.54	0.0149626	0.0433447	0.345201	0.729943	0.84977	0.1406	0.0429996	3.2698	0.00107623	0.00382678
ENSG00000100652	SLC10A1	1.219	0.215458	1.17509	0.183354	0.85452	NA	0.828376	1.12376	0.737149	0.461032	NA
ENSG00000100678	SLC8A3	0.78429	3.43748	1.65324	2.07924	0.0375951	NA	1.67861	1.86154	0.901736	0.367197	NA
ENSG00000101187	SLCO4A1	617.237	0.215197	0.0653552	3.29273	0.000992188	0.00594229	-0.0249253	0.0665285	-0.374656	0.707916	0.822469
ENSG00000101194	SLC17A9	0.333022	-1.08702	2.57142	-0.422734	0.672489	NA	-0.342441	2.57006	-0.133242	0.894002	NA
ENSG00000101276	SLC52A3	91.1745	0.151238	0.139132	1.08701	0.277032	0.466767	-0.593869	0.153112	-3.87865	0.000105036	0.000441048
ENSG00000101438	SLC32A1	0	NA	NA	NA	NA	NA	NA	NA	NA	NA	NA
ENSG00000102078	SLC25A14	226.679	0.0633815	0.0955466	0.663357	0.507102	0.689261	0.293587	0.093788	3.13033	0.00174613	0.00598022
ENSG00000102100	SLC35A2	1007.93	0.0733222	0.045079	1.62653	0.103837	0.236466	-0.302258	0.0466911	-6.47357	9.57163e-11	7.87727e-10
ENSG00000102743	SLC25A15	890.491	0.14682	0.0511701	2.86926	0.00411435	0.0191789	-0.0923566	0.0521552	-1.7708	0.0765932	0.165478
ENSG00000103042	SLC38A7	786.049	-0.0156579	0.0516068	-0.303407	0.76158	0.86966	0.0179534	0.0515258	0.348435	0.727514	0.836392
ENSG00000103061	SLC7A6OS	92.4039	0.076602	0.149099	0.513764	0.607417	0.765097	0.145078	0.148396	0.97764	0.328252	0.500791
ENSG00000103064	SLC7A6	284.547	0.140252	0.083491	1.67985	0.0929864	0.217923	0.268029	0.0826371	3.24345	0.00118092	0.00416745
ENSG00000103257	SLC7A5	285.018	-2.01824	0.0988399	-20.4193	1.12736e-92	1.64896e-89	-3.07213	0.120983	-25.3931	3.0091e-142	2.1185e-139
ENSG00000103546	SLC6A2	0.032027	0	5.94781	0	1	NA	0.9626	5.94781	0.161841	0.871431	NA
ENSG00000104154	SLC30A4	5519.74	-0.0584121	0.0477197	-1.22407	0.220927	0.402308	0.010841	0.0476755	0.227392	0.820119	0.896708
ENSG00000104635	SLC39A14	2580.53	-0.0867778	0.0292517	-2.96659	0.00301119	0.0148629	-0.182656	0.0295314	-6.18514	6.20476e-10	4.77069e-09
ENSG00000104888	SLC17A7	1.49563	0.909095	1.24059	0.732794	0.463684	NA	0.221957	1.30375	0.170245	0.864817	0.923903
ENSG00000105143	SLC1A6	0	NA	NA	NA	NA	NA	NA	NA	NA	NA	NA
ENSG00000105281	SLC1A5	2338.43	-0.621873	0.0632434	-9.83302	8.11472e-23	8.82828e-21	-1.85498	0.0658217	-28.1819	9.75806e-175	1.28812e-171
ENSG00000105641	SLC5A5	0.208509	0	4.19427	0	1	NA	0.962614	4.19427	0.229507	0.818475	NA
ENSG00000106688	SLC1A1	89.5157	-0.107139	0.135519	-0.790579	0.42919	0.620727	-0.171398	0.136867	-1.25229	0.210463	0.364389
ENSG00000108528	SLC25A11	4064.88	0.072548	0.0320271	2.26521	0.0234998	0.0778371	0.282015	0.0317662	8.87784	6.81698e-19	1.04486e-17
ENSG00000108576	SLC6A4	3.86107	-0.928399	1.04899	-0.885037	0.376137	NA	0.781317	0.861989	0.906412	0.364718	0.537858
ENSG00000108932	SLC16A6	675.785	0.160654	0.0579324	2.77312	0.00555212	0.0246503	-0.545177	0.0607327	-8.97667	2.79092e-19	4.40891e-18
ENSG00000109062	SLC9A3R1	2805.97	-0.0404476	0.036165	-1.11842	0.263389	0.452091	-0.409195	0.0369445	-11.0759	1.64152e-28	4.13235e-27
ENSG00000109667	SLC2A9	8.47322	-0.411206	0.509033	-0.807819	0.419195	NA	-0.184528	0.49891	-0.369862	0.711485	0.824861
ENSG00000110436	SLC1A2	8.70425	-0.179863	0.404698	-0.444437	0.656727	NA	0.556792	0.376448	1.47907	0.139122	0.266757
ENSG00000110446	SLC15A3	0.987246	-1.34923	1.515	-0.890581	0.373154	NA	0.257319	1.27443	0.20191	0.839987	NA
ENSG00000110628	SLC22A18	165.377	-0.140444	0.117164	-1.19869	0.230647	0.414777	-0.620917	0.122943	-5.05044	4.4079e-07	2.54509e-06
ENSG00000110660	SLC35F2	1077.01	0.18245	0.0451868	4.03768	5.39824e-05	0.000476609	-0.122379	0.0463369	-2.64108	0.00826432	0.0243514
ENSG00000110911	SLC11A2	2088.64	-0.116374	0.0414341	-2.80865	0.00497494	0.0224897	-0.485713	0.0423509	-11.4688	1.89313e-30	5.30303e-29
ENSG00000111181	SLC6A12	4.86582	0.0315522	0.653062	0.0483143	0.961466	NA	-1.04557	0.764654	-1.36738	0.171508	0.313683
ENSG00000111371	SLC38A1	4292.54	-0.443656	0.0345068	-12.8571	7.84977e-38	2.34851e-35	-0.334776	0.0343776	-9.73822	2.07145e-22	3.88553e-21
ENSG00000111700	SLCO1B3	0.0647712	1.67513	5.94551	0.281748	0.778137	NA	0	5.94781	0	1	NA
ENSG00000112053	SLC26A8	0.964715	-1.017	1.38806	-0.732676	0.463756	NA	-2.29326	1.50572	-1.52303	0.12775	NA
ENSG00000112337	SLC17A2	0.0650132	0	5.94781	0	1	NA	1.68676	5.94734	0.283615	0.776705	NA
ENSG00000112394	SLC16A10	180.559	0.266592	0.10604	2.51408	0.0119342	0.0455236	-0.253936	0.110912	-2.28953	0.0220486	0.0575422
ENSG00000112473	SLC39A7	4395.31	-0.00639596	0.026214	-0.24399	0.807238	0.897982	-0.186051	0.026524	-7.01444	2.30865e-12	2.19052e-11
ENSG00000112499	SLC22A2	203.713	0.168528	0.113911	1.47948	0.139013	0.291815	-0.107758	0.116575	-0.924362	0.355298	0.528381
ENSG00000112759	SLC29A1	811.233	0.212879	0.0626519	3.39781	0.000679286	0.00433873	-0.17874	0.0640478	-2.79072	0.00525903	0.0162844
ENSG00000113073	SLC4A9	2.59204	-0.217907	0.903635	-0.241144	0.809443	NA	-0.62646	0.951392	-0.658467	0.510238	0.671448
ENSG00000113396	SLC27A6	0.440912	-0.496415	2.2185	-0.223761	0.822943	NA	0.241336	2.2185	0.108783	0.913374	NA
ENSG00000113504	SLC12A7	2701.47	0.17913	0.0359113	4.98813	6.09653e-07	8.72796e-06	-0.0589601	0.0364053	-1.61955	0.105329	0.214054
ENSG00000114120	SLC25A36	1348.06	-0.512943	0.0455056	-11.2721	1.80263e-29	3.16397e-27	-0.39982	0.045162	-8.85301	8.51881e-19	1.2963e-17
ENSG00000114544	SLC41A3	597.832	-0.127863	0.0662227	-1.9308	0.053508	0.145024	-0.171969	0.0665344	-2.58467	0.00974735	0.0281517
ENSG00000114923	SLC4A3	190.508	-0.0805533	0.100144	-0.804371	0.421183	0.614003	-0.546227	0.10582	-5.16188	2.44486e-07	1.45582e-06
ENSG00000115084	SLC35F5	3249.89	-0.0357993	0.0384265	-0.931631	0.351527	0.54647	-0.191123	0.0386636	-4.94323	7.68405e-07	4.29692e-06
ENSG00000115194	SLC30A3	2.44036	-1.02353	0.953066	-1.07394	0.282852	NA	-1.01203	0.953918	-1.06092	0.288728	0.457059
ENSG00000115616	SLC9A2	1758.1	0.132222	0.0384988	3.43443	0.000593797	0.00387543	-0.116914	0.0391816	-2.9839	0.00284601	0.0093572
ENSG00000115665	SLC5A7	2.88491	-0.454979	0.853014	-0.533378	0.593772	NA	-0.430129	0.852303	-0.504666	0.613793	0.758036
ENSG00000115840	SLC25A12	327.934	0.165862	0.086935	1.90789	0.0564057	0.150766	-0.42429	0.0910107	-4.66198	3.13177e-06	1.62641e-05
ENSG00000115902	SLC1A4	305.997	-1.16758	0.0938896	-12.4357	1.67263e-35	4.15444e-33	-1.53538	0.0977428	-15.7084	1.32521e-55	1.10632e-53
ENSG00000116704	SLC35D1	2.57508	1.07526	0.904094	1.18932	0.234313	NA	0.979352	0.912683	1.07305	0.28325	0.450824
ENSG00000117394	SLC2A1	1479.1	0.113725	0.0415423	2.73758	0.00618933	0.0268479	-0.0189785	0.0419723	-0.452168	0.651148	0.784413
ENSG00000117479	SLC19A2	1032.59	0.0259347	0.0559679	0.463384	0.643089	0.791041	0.192593	0.0555792	3.4652	0.00052983	0.00198872
ENSG00000117620	SLC35A3	1035.75	0.0318084	0.0536676	0.592693	0.553386	0.726299	0.172027	0.0532631	3.22976	0.00123893	0.00435615
ENSG00000117834	SLC5A9	0.592398	1.14861	2.13863	0.537077	0.591215	NA	-1.22053	2.25228	-0.541909	0.587881	NA
ENSG00000118160	SLC8A2	4.68887	-1.1429	0.783621	-1.45848	0.144707	NA	-0.141897	0.697873	-0.203328	0.838879	0.906795
ENSG00000118596	SLC16A7	189.726	0.0206359	0.110018	0.187568	0.851215	0.921648	0.11386	0.109352	1.04122	0.297772	0.467263
ENSG00000119457	SLC46A2	0.0919645	0	5.94781	0	1	NA	0	5.94781	0	1	NA
ENSG00000119899	SLC17A5	664.198	-0.140236	0.0556486	-2.52003	0.0117345	0.0448656	0.0531923	0.0546965	0.9725	0.330802	0.503471
ENSG00000120329	SLC25A2	0.220192	0.946226	3.71052	0.255012	0.798714	NA	1.67992	3.71005	0.452802	0.650691	NA
ENSG00000120519	SLC10A7	503.781	0.137291	0.0694995	1.97542	0.0482201	0.134059	0.491615	0.0679711	7.23271	4.73451e-13	4.77772e-12
ENSG00000121073	SLC35B1	1312.47	-0.152556	0.0405571	-3.76151	0.000168891	0.00130169	0.0190943	0.0400096	0.477243	0.633189	0.772816
ENSG00000122490	SLC66A2	964.614	0.126811	0.048702	2.60382	0.00921924	0.036877	0.0607142	0.0490152	1.23868	0.215464	0.370708
ENSG00000122696	SLC25A51	193.467	-0.097009	0.0930242	-1.04284	0.297024	0.489342	0.180789	0.0902071	2.00415	0.0450535	0.10637
ENSG00000122912	SLC25A16	2051.32	0.0748989	0.0415334	1.80334	0.071335	0.179655	0.293296	0.0411322	7.13056	9.99602e-13	9.82438e-12
ENSG00000123643	SLC36A1	351.375	0.035758	0.076179	0.469394	0.638788	0.787581	0.131661	0.0757198	1.7388	0.0820704	0.175127
ENSG00000124067	SLC12A4	40.9458	0.162864	0.22896	0.711322	0.476885	0.664427	0.293964	0.226377	1.29856	0.194096	0.3434
ENSG00000124140	SLC12A5	0.393608	-0.521664	2.68084	-0.19459	0.845714	NA	-1.2266	2.68084	-0.457544	0.64728	NA
ENSG00000124564	SLC17A3	0.120159	-0.496398	5.94781	-0.083459	0.933487	NA	0.241341	5.94781	0.0405766	0.967633	NA
ENSG00000124568	SLC17A1	0	NA	NA	NA	NA	NA	NA	NA	NA	NA	NA
ENSG00000124786	SLC35B3	329.288	-0.164078	0.0716746	-2.28921	0.0220674	0.0741249	-0.075626	0.0711109	-1.06349	0.287558	0.455846
ENSG00000125255	SLC10A2	0	NA	NA	NA	NA	NA	NA	NA	NA	NA	NA
ENSG00000125434	SLC25A35	272.386	0.225864	0.0881543	2.56214	0.010403	0.0406413	0.220234	0.0883342	2.49319	0.0126602	0.0354638
ENSG00000125454	SLC25A19	263.949	0.549332	0.0843602	6.51175	7.42814e-11	2.32266e-09	0.414653	0.0853814	4.85648	1.19493e-06	6.51813e-06
ENSG00000125520	SLC2A4RG	2563.81	0.116093	0.045918	2.52827	0.0114625	0.0440305	-0.0455326	0.0462065	-0.985414	0.324421	0.496456
ENSG00000125648	SLC25A23	1920.59	0.0162405	0.0334581	0.485398	0.627394	0.779299	0.039919	0.0334365	1.19387	0.232528	0.391582
ENSG00000126903	SLC10A3	522.629	0.164562	0.0673715	2.4426	0.0145818	0.053544	-0.108815	0.0688405	-1.58069	0.113949	0.227974
ENSG00000127526	SLC35E1	2454.18	0.0516996	0.0358846	1.44072	0.149664	0.308226	-0.138103	0.0363357	-3.80075	0.000144261	0.000593946
ENSG00000129353	SLC44A2	3248.4	0.0615249	0.0280251	2.19535	0.0281382	0.0891056	0.283313	0.0276309	10.2535	1.1418e-24	2.37128e-23
ENSG00000130304	SLC27A1	273.438	0.113288	0.0976501	1.16014	0.245993	0.432042	-0.282299	0.100692	-2.80358	0.00505391	0.0157115
ENSG00000130821	SLC6A8	3376.44	0.187042	0.0278376	6.71904	1.82926e-11	6.22234e-10	0.0553603	0.0281169	1.96893	0.0489607	0.113925
ENSG00000130876	SLC7A10	0.362951	-0.496448	4.55769	-0.108925	0.913262	NA	-0.480043	4.55769	-0.105326	0.916117	NA
ENSG00000130958	SLC35D2	85.1329	-0.267853	0.142048	-1.88566	0.0593413	0.156282	-0.647147	0.149502	-4.32869	1.49999e-05	7.12899e-05
ENSG00000131183	SLC34A1	8.23525	-0.0492687	0.484948	-0.101596	0.919077	NA	-0.168546	0.491324	-0.343045	0.731565	0.839703
ENSG00000131389	SLC6A6	326.29	-0.0198264	0.103249	-0.192026	0.847722	0.919681	0.390979	0.101274	3.86059	0.000113113	0.00047224
ENSG00000132164	SLC6A11	501.958	-0.0491302	0.06352	-0.77346	0.43925	0.629947	-0.610859	0.0672973	-9.07702	1.11588e-19	1.79912e-18
ENSG00000132517	SLC52A1	0.215797	-0.496413	3.72437	-0.133288	0.893966	NA	-0.480009	3.72437	-0.128883	0.89745	NA
ENSG00000132874	SLC14A2	4.1504	-0.103166	0.856934	-0.12039	0.904174	NA	-0.0820817	0.856497	-0.0958342	0.923652	0.957376
ENSG00000133065	SLC41A1	1105.51	0.133127	0.0443517	3.00163	0.00268539	0.0135132	0.330921	0.0437559	7.56288	3.94239e-14	4.33457e-13
ENSG00000133195	SLC39A11	453.174	-0.0836925	0.0616829	-1.35682	0.174839	0.341988	-0.628164	0.0661377	-9.49783	2.1432e-21	3.80071e-20
ENSG00000133460	SLC2A11	191.419	-0.0835083	0.0999956	-0.83512	0.40365	0.597711	-0.553195	0.105414	-5.24785	1.53882e-07	9.36642e-07
ENSG00000134294	SLC38A2	5525.68	-0.652649	0.0527341	-12.3762	3.51423e-35	8.56691e-33	-0.177042	0.0524064	-3.37825	0.000729475	0.00267162
ENSG00000134538	SLCO1B1	0.352283	-1.75592	3.04224	-0.577178	0.563819	NA	-1.73951	3.04224	-0.571786	0.567467	NA
ENSG00000134802	SLC43A3	0.14573	0	5.19384	0	1	NA	0	5.19384	0	1	NA
ENSG00000134955	SLC37A2	32.9031	-0.152923	0.218939	-0.698471	0.484882	0.670319	-0.0105737	0.216092	-0.0489313	0.960974	0.978162
ENSG00000135502	SLC26A10	0.0999233	0.94617	5.94781	0.159079	0.873607	NA	0	5.94781	0	1	NA
ENSG00000135740	SLC9A5	38.693	-0.0193233	0.216242	-0.0893592	0.928796	0.966211	-0.698863	0.232824	-3.00168	0.00268495	0.00887185
ENSG00000135917	SLC19A3	0.193864	0.946211	4.25848	0.222194	0.824163	NA	0.962616	4.25848	0.226047	0.821165	NA
ENSG00000136052	SLC41A2	131.058	-0.155566	0.123592	-1.25871	0.208136	0.386011	0.143115	0.119657	1.19604	0.23168	0.39048
ENSG00000136856	SLC2A8	581.491	0.00132896	0.0632455	0.0210127	0.983235	0.99197	0.0113326	0.0632792	0.179089	0.857868	0.919654
ENSG00000136867	SLC31A2	12.0085	0.163686	0.41799	0.391602	0.695352	NA	0.118088	0.420311	0.280955	0.778745	0.872197
[truncated: 331 more rows]

## Sheet: AA Transporters
Ensembl ID	Gene Name	Common Name	BaseMean	GCN2iB - 6 hours					GCN2iB - 24 hours
[truncated: 62 more rows]

[truncated: 3 more sheets: tRNA Synthetases, Ser-Gly Biosynthesis, Figure 2C]
